# Supplementary material for: Contagious Ovine Digital Dermatitis: A Novel Bacterial Etiology and Lesion Pathogenesis
Source: Front Vet Sci. 2021 Sep 23;8:722461. doi: 10.3389/fvets.2021.722461 (PMC8496452; doi:10.3389/fvets.2021.722461)
Supplement: Supplementary file 1 [file Table_1.XLS]

## Sheet: Sheet1
complete	swabid	visitno	treat	examdate	examid	sheepid	footid	sheeptype	site	foot	hindfore	rightleft	binfoot	mean_fuso	mean_nod	mean_tmed	mean_tped	mean_tphag	pcrpos	bin_fuso2	bin_nod2	bin_tmed2	bin_tped2	bin_tphag2	bin_trep2	bcs	lame	lesion	disease	codd_other	bleed	daiflcodd	daifrcodd	daibrcodd	daiblcodd	coddgrade	grade5	binscald	binfootrot	bincodd	binother	ex2	log10fuso	log10nod	log10tmed	log10tped	log10tphag	log10trep	overall_disease
1	33-14-F3	33	pre-treatment	2016-05-16	33	14	14F3	expt sheep	F3	Back left	back foot	left	foot	23153.9	722.967	225297	50845.4	44123.7	1	1	1	1	1	1	1	2	3	fr&CODD	CODD	CODD & footrot	1				2	2	codd1-4	0	0	1	0	20590	4.36464	2.85972	5.35276	4.70626	4.64468	5.02839	codd
1	5-19-F2	5	pre-treatment	2016-02-08	5	19	19F2	expt sheep	F2	Front right	front foot	right	foot	0	0	0	0	0	0	0	0	0	0	0	0	2	0	0	no disease		1		0			0		0	0	0	0	20492	0	0	0	0	0		no disease
1	47-5-F4	47	post-treatment	2016-06-27	47	5	5F4	expt sheep	F4	Back right	back foot	right	foot	0	0	0	0	2.99801	0	0	0	0	0	0	0	2	0	CODD	CODD	CODD only	1			5		5	codd5	0	0	1	0	20632	0	0	0	0	0.601844	-0.000287815	codd
1	41-12-F3	41	pre-treatment	2016-06-06	41	12	12F3	expt sheep	F3	Back left	back foot	left	foot	339.115	118103	864.4	42.273	153.738	1	1	1	1	1	1	1	2	3	CODD	CODD	CODD only	0				5	5	codd5	0	0	1	0	20611	2.53163	5.07226	2.93722	1.63622	2.1896	2.54835	codd
1	43-5-F2	43	post-treatment	2016-06-13	43	5	5F2	expt sheep	F2	Front right	front foot	right	foot	2234.43	35872.3	2980.79	357.628	1196.89	1	1	1	1	1	1	1	1	3	fr&CODD	CODD	CODD & footrot	1		5			5	codd5	0	0	1	0	20618	3.34936	4.55477	3.47448	2.55464	3.07842	3.17948	codd
1	23-2-F2	23	pre-treatment	2016-04-11	23	2	2F2	expt sheep	F2	Front right	front foot	right	foot	4196.23	12115	0	0	0	1	1	1	0	0	0	0	3	0	scald	ID		0		0			0		1	0	0	0	20555	3.62296	4.08336	0	0	0		codd
1	47-23-F4	47	post-treatment	2016-06-27	47	23	23F4	expt sheep	F4	Back right	back foot	right	foot	0	0	0	0	0	0	0	0	0	0	0	0	2	1	CODD	CODD	CODD only	1			5		5	codd5	0	0	1	0	20632	0	0	0	0	0		codd
1	1-15-F2	1	pre-treatment	2016-01-26	1	15	15F2	expt sheep	F2	Front right	front foot	right	foot	10.268	0	0	0	15.328	0	0	0	0	0	1	1	2	0	0	no disease		1		0			0		0	0	0	0	20479	1.05185	0	0	0	1.21293	0.708363	codd
0	1-3-F3	1	pre-treatment	2016-01-26	1	3	3F3	expt sheep	F3	Back left	back foot	left	foot	0	0	0	0	13.9397	0	0	0	0	0	1	1	3	0	0	no disease		1				0	0		0	0	0	0	20479	0	0	0	0	1.17434	0.667132	no disease
1	15-5-F3	15	pre-treatment	2016-03-14	15	5	5F3	expt sheep	F3	Back left	back foot	left	foot	0	0	0	0	0	0	0	0	0	0	0	0	4	0	0	no disease		0				0	0		0	0	0	0	20527	0	0	0	0	0		codd
1	5-8-F3	5	pre-treatment	2016-02-08	5	8	8F3	expt sheep	F3	Back left	back foot	left	foot	0	0	0	0	0	0	0	0	0	0	0	0	3	0	0	no disease		1				0	0		0	0	0	0	20492	0	0	0	0	0		codd
1	33-19-F2	33	pre-treatment	2016-05-16	33	19	19F2	expt sheep	F2	Front right	front foot	right	foot	0	0	0	0	0	0	0	0	0	0	0	0	2	0	0	no disease		1		0			0		0	0	0	0	20590	0	0	0	0	0		no disease
1	38-21-F2	38	pre-treatment	2016-05-31	38	21	21F2	expt sheep	F2	Front right	front foot	right	foot	0	0	3.89945	0	0	0	0	0	0	0	0	0	3	0	0	no disease		1		0			0		0	0	0	0	20605	0	0	0.690147	0	0	0.113882	no disease
1	47-18-F2	47	post-treatment	2016-06-27	47	18	18F2	expt sheep	F2	Front right	front foot	right	foot	0	0	0	0	0	0	0	0	0	0	0	0	3	0	0	no disease		1		0			0		0	0	0	0	20632	0	0	0	0	0		no disease
1	9-28-F2	9	pre-treatment	2016-02-22	9	28	28F2	expt sheep	F2	Front right	front foot	right	foot	0	0	0	0	0	0	0	0	0	0	0	0	4	0	0	no disease		1		0			0		0	0	0	0	20506	0	0	0	0	0		footrot
1	25-8-F2	25	pre-treatment	2016-04-18	25	8	8F2	expt sheep	F2	Front right	front foot	right	foot	0	0	0	0	0	0	0	0	0	0	0	0	3	2	0	no disease		1		0			0		0	0	0	0	20562	0	0	0	0	0		no disease
1	23-14-F1	23	pre-treatment	2016-04-11	23	14	14F1	expt sheep	F1	Front left	front foot	left	foot	0	0	0	0	0	0	0	0	0	0	0	0	3	0	0	no disease		0	0				0		0	0	0	0	20555	0	0	0	0	0		scald
1	35-12-F1	35	pre-treatment	2016-05-23	35	12	12F1	expt sheep	F1	Front left	front foot	left	foot	0	0	0	0.77809	4.91103	0	0	0	0	0	0	0	2	3	0	no disease		0	0				0		0	0	0	0	20597	0	0	0	0.249954	0.771663	0.277923	no disease
1	33-46-F4	33	pre-treatment	2016-05-16	33	46	46F4	source sheep	F4	Back right	back foot	right	foot	83979.7	904.992	446705	29442.4	61759.8	1	1	1	1	1	1	1	2	3	fr&CODD	CODD	CODD & footrot	1			2		2	codd1-4	0	0	1	0	20590	4.92418	2.95712	5.65002	4.46899	4.79071	5.25359
1	1-13-F3	1	pre-treatment	2016-01-26	1	13	13F3	expt sheep	F3	Back left	back foot	left	foot	22.5257	0	0	0	5.81262	1	0	0	0	0	0	0	2	0	0	no disease		1				0	0		0	0	0	0	20479	1.37154	0	0	0	0.833314	0.287251	no disease
0	29-3-F1	29	pre-treatment	2016-05-03	29	3	3F1	expt sheep	F1	Front left	front foot	left	foot	1188.91	11800.1	40.6979	14.5365	0	1	1	1	1	0	0	1	2	2	footrot	FR		1	0				0		0	1	0	0	20577	3.07552	4.07192	1.62011	1.19135	0	1.26509	codd
1	1-7-F4	1	pre-treatment	2016-01-26	1	7	7F4	expt sheep	F4	Back right	back foot	right	foot	17.0663	0	0	0	0	0	0	0	0	0	0	0	3	0	0	no disease		1			0		0		0	0	0	0	20479	1.25687	0	0	0	0		scald
1	47-14-F3	47	post-treatment	2016-06-27	47	14	14F3	expt sheep	F3	Back left	back foot	left	foot	0	0	0	2.66888	7.71695	0	0	0	0	0	0	0	2	1	CODD	CODD	CODD only	1				5	5	codd5	0	0	1	0	20632	0	0	0	0.564534	0.940364	0.53932	codd
1	47-9-F2	47	post-treatment	2016-06-27	47	9	9F2	expt sheep	F2	Front right	front foot	right	foot	0	0	0	0	0	0	0	0	0	0	0	0	2	0	CODD	CODD	CODD only	1		5			5	codd5	0	0	1	0	20632	0	0	0	0	0		codd
1	43-26-F3	43	post-treatment	2016-06-13	43	26	26F3	expt sheep	F3	Back left	back foot	left	foot	0	0	0	0.914877	0	0	0	0	0	0	0	0	3	0	0	no disease		1				0	0		0	0	0	0	20618	0	0	0	0.282141	0	-0.515759	no disease
1	41-21-F2	41	pre-treatment	2016-06-06	41	21	21F2	expt sheep	F2	Front right	front foot	right	foot	29.1101	0	0	0	0	1	0	0	0	0	0	0	3	0	0	no disease		0		0			0		0	0	0	0	20611	1.47871	0	0	0	0		no disease
1	43-9-F1	43	post-treatment	2016-06-13	43	9	9F1	expt sheep	F1	Front left	front foot	left	foot	93.2872	82.7141	0	0	0	1	1	1	0	0	0	0	2	0	CODD	CODD	CODD only	1	5				5	codd5	0	0	1	0	20618	1.97445	1.9228	0	0	0		codd
1	17-22-F2	17	pre-treatment	2016-03-21	17	22	22F2	expt sheep	F2	Front right	front foot	right	foot	0	0	0	0	0	0	0	0	0	0	0	0	3	0	0	no disease		1		0			0		0	0	0	0	20534	0	0	0	0	0		no disease
1	38-2-F4	38	pre-treatment	2016-05-31	38	2	2F4	expt sheep	F4	Back right	back foot	right	foot	0	48327.4	0	0	0	1	0	1	0	0	0	0	3	3	0	no disease		1			0		0		0	0	0	0	20605	0	4.6842	0	0	0		footrot
0	29-5-F2	29	pre-treatment	2016-05-03	29	5	5F2	expt sheep	F2	Front right	front foot	right	foot	103565	18871.3	48927.1	26951.6	0	1	1	1	1	1	0	1	3	3	footrot	FR		1		0			0		0	1	0	0	20577	5.01522	4.27583	4.68956	4.4306	0	4.403	codd
1	15-7-F2	15	pre-treatment	2016-03-14	15	7	7F2	expt sheep	F2	Front right	front foot	right	foot	0	0	0	0	0	0	0	0	0	0	0	0	4	0	0	no disease		0		0			0		0	0	0	0	20527	0	0	0	0	0		codd
1	21-7-F3	21	pre-treatment	2016-04-04	21	7	7F3	expt sheep	F3	Back left	back foot	left	foot	0	0	0	0	0	0	0	0	0	0	0	0	3	1	0	no disease		1				0	0		0	0	0	0	20548	0	0	0	0	0		scald
1	23-14-F4	23	pre-treatment	2016-04-11	23	14	14F4	expt sheep	F4	Back right	back foot	right	foot	21444.6	3488.46	0	0	0	1	1	1	0	0	0	0	3	0	0	no disease		0			0		0		0	0	0	0	20555	4.33134	3.54276	0	0	0		codd
1	19-9-F4	19	pre-treatment	2016-03-28	19	9	9F4	expt sheep	F4	Back right	back foot	right	foot	0	0	0	0	0	0	0	0	0	0	0	0	3	0	0	no disease		0			0		0		0	0	0	0	20541	0	0	0	0	0		no disease
1	13-24-F1	13	pre-treatment	2016-03-07	13	24	24F1	expt sheep	F1	Front left	front foot	left	foot	0	0	0	0	0	0	0	0	0	0	0	0	3	0	0	no disease		1	0				0		0	0	0	0	20520	0	0	0	0	0		no disease
1	23-9-F4	23	pre-treatment	2016-04-11	23	9	9F4	expt sheep	F4	Back right	back foot	right	foot	0	0	0	0	0	0	0	0	0	0	0	0	3	0	0	no disease		0			0		0		0	0	0	0	20555	0	0	0	0	0		no disease
1	21-29-F2	21	pre-treatment	2016-04-04	21	29	29F2	expt sheep	F2	Front right	front foot	right	foot	0	0	0	0	0	0	0	0	0	0	0	0	4	0	0	no disease		1		0			0		0	0	0	0	20548	0	0	0	0	0		no disease
1	38-15-F3	38	pre-treatment	2016-05-31	38	15	15F3	expt sheep	F3	Back left	back foot	left	foot	799.642	309870	8882.98	27.7815	12883.4	1	1	1	1	1	1	1	2	3	scald	ID		1				0	0		1	0	0	0	20605	2.90344	5.49118	3.94861	1.45911	4.11006	3.86122	codd
1	35-27-F2	35	pre-treatment	2016-05-23	35	27	27F2	expt sheep	F2	Front right	front foot	right	foot	0	0	0	0	0	0	0	0	0	0	0	0	3	0	0	no disease		0		0			0		0	0	0	0	20597	0	0	0	0	0		no disease
1	41-3-F1	41	pre-treatment	2016-06-06	41	3	3F1	expt sheep	F1	Front left	front foot	left	foot	6958.98	26968.5	22495.1	2062.73	1406.24	1	1	1	1	1	1	1	2	3	fr&CODD	CODD	CODD & footrot	0	2				2	codd1-4	0	0	1	0	20611	3.84261	4.43087	4.35211	3.31465	3.14837	3.93725	codd
1	17-15-F2	17	pre-treatment	2016-03-21	17	15	15F2	expt sheep	F2	Front right	front foot	right	foot	118811	817583	15027.5	0	23818.1	1	1	1	1	0	1	1	3	2	fr&scald	FR		1		0			0		0	1	0	0	20534	5.07486	5.91253	4.17692	0	4.37693	4.11222	codd
1	47-21-F2	47	post-treatment	2016-06-27	47	21	21F2	expt sheep	F2	Front right	front foot	right	foot	0	0	0	0	3.38257	0	0	0	0	0	0	0	3	0	0	no disease		1		0			0		0	0	0	0	20632	0	0	0	0	0.641729	0.0521262	no disease
1	33-16-F1	33	pre-treatment	2016-05-16	33	16	16F1	expt sheep	F1	Front left	front foot	left	foot	29.0454	0	0	0	0	1	0	0	0	0	0	0	3	0	0	no disease		1	0				0		0	0	0	0	20590	1.47778	0	0	0	0		no disease
1	13-27-F2	13	pre-treatment	2016-03-07	13	27	27F2	expt sheep	F2	Front right	front foot	right	foot	14.6539	0	0	3.07873	9.4781	0	0	0	0	0	0	0	3	0	0	no disease		1		0			0		0	0	0	0	20520	1.19462	0	0	0.610525	1.02028	0.621759	no disease
1	47-9-F4	47	post-treatment	2016-06-27	47	9	9F4	expt sheep	F4	Back right	back foot	right	foot	0	0	0	0	0	0	0	0	0	0	0	0	2	0	0	no disease		1			0		0		0	0	0	0	20632	0	0	0	0	0		no disease
1	25-24-F4	25	pre-treatment	2016-04-18	25	24	24F4	expt sheep	F4	Back right	back foot	right	foot	34.2053	0	328.573	31.4382	7.90586	1	0	0	1	1	0	1	4	0	0	no disease		1			0		0		0	0	0	0	20562	1.54661	0	2.51795	1.51106	0.949676	2.08863	no disease
1	51-1-F4	51	post-treatment	2016-07-11	51	1	1F4	expt sheep	F4	Back right	back foot	right	foot	0	0	0	0	0	0	0	0	0	0	0	0	2	0	0	no disease		0			0		0		0	0	0	0	20646	0	0	0	0	0		no disease
1	21-5-F2	21	pre-treatment	2016-04-04	21	5	5F2	expt sheep	F2	Front right	front foot	right	foot	0	0	0	0	0	0	0	0	0	0	0	0	3	0	0	no disease		1		0			0		0	0	0	0	20548	0	0	0	0	0		codd
1	13-10-F3	13	pre-treatment	2016-03-07	13	10	10F3	expt sheep	F3	Back left	back foot	left	foot	142.729	0	0	0	14.2466	1	1	0	0	0	1	1	3	0	0	no disease		1				0	0		0	0	0	0	20520	2.15754	0	0	0	1.18317	0.676589	no disease
1	21-5-F4	21	pre-treatment	2016-04-04	21	5	5F4	expt sheep	F4	Back right	back foot	right	foot	0	0	18.9782	7.45472	28.7988	1	0	0	0	0	1	1	3	0	0	no disease		1			0		0		0	0	0	0	20548	0	0	1.30056	0.927099	1.4742	1.26507	codd
1	27-20-F3	27	pre-treatment	2016-04-25	27	20	20F3	expt sheep	F3	Back left	back foot	left	foot	10.5248	0	0	9.5431	0	0	0	0	0	0	0	0	3	0	0	no disease		0				0	0		0	0	0	0	20569	1.06163	0	0	1.02297	0	0.502568	no disease
1	41-23-F1	41	pre-treatment	2016-06-06	41	23	23F1	expt sheep	F1	Front left	front foot	left	foot	60.9966	0	0	3.31993	15.0376	1	1	0	0	0	1	1	2	2	0	no disease		0	0				0		0	0	0	0	20611	1.79237	0	0	0.635477	1.20514	0.786692	no disease
1	43-1-F4	43	post-treatment	2016-06-13	43	1	1F4	expt sheep	F4	Back right	back foot	right	foot	0	0	0	0	0	0	0	0	0	0	0	0	2	0	0	no disease		1			0		0		0	0	0	0	20618	0	0	0	0	0		no disease
1	11-6-F1	11	pre-treatment	2016-02-29	11	6	6F1	expt sheep	F1	Front left	front foot	left	foot	0	0	0	1.36481	4.01513	0	0	0	0	0	0	0	4	0	0	no disease		0	0				0		0	0	0	0	20513	0	0	0	0.373797	0.700282	0.253657	codd
1	7-20-F4	7	pre-treatment	2016-02-15		20	20F4	expt sheep	F4	Back right	back foot	right	foot	8.73739	0	0	0	7.78358	0	0	0	0	0	0	0			0	no disease					0		0		0	0	0	0	20499	0.988442	0	0	0	0.943672	0.414058	no disease
1	35-17-F2	35	pre-treatment	2016-05-23	35	17	17F2	expt sheep	F2	Front right	front foot	right	foot	0	0	58.3506	0	0	1	0	0	1	0	0	1	3	0	0	no disease		0		0			0		0	0	0	0	20597	0	0	1.77342	0	0	1.28892	codd
1	23-11-F1	23	pre-treatment	2016-04-11	23	11	11F1	expt sheep	F1	Front left	front foot	left	foot	0	0	0	0	0	0	0	0	0	0	0	0	3	0	0	no disease		0	0				0		0	0	0	0	20555	0	0	0	0	0		scald
1	38-23-F4	38	pre-treatment	2016-05-31	38	23	23F4	expt sheep	F4	Back right	back foot	right	foot	402.195	0	80321.6	10919.3	8172.04	1	1	0	1	1	1	1	2	3	CODD	CODD	CODD only	1			3		3	codd1-4	0	0	1	0	20605	2.60552	0	4.90484	4.03823	3.91238	4.52032	codd
1	15-10-F2	15	pre-treatment	2016-03-14	15	10	10F2	expt sheep	F2	Front right	front foot	right	foot	0	0	0	0	0	0	0	0	0	0	0	0	2	0	0	no disease		0		0			0		0	0	0	0	20527	0	0	0	0	0		footrot
1	43-16-F3	43	post-treatment	2016-06-13	43	16	16F3	expt sheep	F3	Back left	back foot	left	foot	0	0	0	13.4718	5.15168	0	0	0	0	0	0	0	3	0	0	no disease		1				0	0		0	0	0	0	20618	0	0	0	1.16052	0.788994	0.792941	no disease
1	11-15-F1	11	pre-treatment	2016-02-29	11	15	15F1	expt sheep	F1	Front left	front foot	left	foot	1583.35	0	31.7652	0	78.961	1	1	0	0	0	1	1	4	0	0	no disease		0	0				0		0	0	0	0	20513	3.19985	0	1.51541	0	1.90288	1.56713	codd
1	17-17-F2	17	pre-treatment	2016-03-21	17	17	17F2	expt sheep	F2	Front right	front foot	right	foot	10.0299	0	0	0	5.09511	0	0	0	0	0	0	0	4	0	0	no disease		1		0			0		0	0	0	0	20534	1.04257	0	0	0	0.784981	0.230032	codd
1	38-12-F2	38	pre-treatment	2016-05-31	38	12	12F2	expt sheep	F2	Front right	front foot	right	foot	633.526	74078.5	81647.2	5228.01	11882.2	1	1	1	1	1	1	1	2	3	CODD	CODD	CODD only	1		2			2	codd1-4	0	0	1	0	20605	2.80245	4.8697	4.91195	3.71842	4.07493	4.51745	codd
0	27-20-F1	27	pre-treatment	2016-04-25	27	20	20F1	expt sheep	F1	Front left	front foot	left	foot	0	0	39.6123	0	6.21295	1	0	0	1	0	0	1	3	0	0	no disease		0	0				0		0	0	0	0	20569	0	0	1.60866	0	0.858113	1.18398	no disease
1	7-28-F1	7	pre-treatment	2016-02-15	7	28	28F1	expt sheep	F1	Front left	front foot	left	foot	0	0	0	0	0	0	0	0	0	0	0	0	4	0	0	no disease		0	0				0		0	0	0	0	20499	0	0	0	0	0		no disease
1	43-12-F1	43	post-treatment	2016-06-13	43	12	12F1	expt sheep	F1	Front left	front foot	left	foot	0	0	0	0	0	0	0	0	0	0	0	0	2	3	0	no disease		1	0				0		0	0	0	0	20618	0	0	0	0	0		no disease
0	3-32-F3	3	pre-treatment	2016-02-02	3	32	32F3	source sheep	F3	Back left	back foot	left	foot	0	0	109025	1862.16	211242	1	0	0	1	1	1	1	2	3	CODD	CODD	CODD only	1				2	2	codd1-4	0	0	1	0	20486	0	0	5.03753	3.27025	5.32478	5.03091
1	47-13-F2	47	post-treatment	2016-06-27	47	13	13F2	expt sheep	F2	Front right	front foot	right	foot	0	0	0	0	0	0	0	0	0	0	0	0	3	0	0	no disease		1		0			0		0	0	0	0	20632	0	0	0	0	0		no disease
1	29-18-F1	29	pre-treatment	2016-05-03	29	18	18F1	expt sheep	F1	Front left	front foot	left	foot	0	0	0	0	0	0	0	0	0	0	0	0	3	0	0	no disease		1	0				0		0	0	0	0	20577	0	0	0	0	0		no disease
1	9-25-F2	9	pre-treatment	2016-02-22	9	25	25F2	expt sheep	F2	Front right	front foot	right	foot	0	0	0	0	0	0	0	0	0	0	0	0	3	0	0	no disease		1		0			0		0	0	0	0	20506	0	0	0	0	0		no disease
1	47-8-F3	47	post-treatment	2016-06-27	47	8	8F3	expt sheep	F3	Back left	back foot	left	foot	0	0	0	0	0	0	0	0	0	0	0	0	3	0	CODD	CODD	CODD only	1				5	5	codd5	0	0	1	0	20632	0	0	0	0	0		codd
1	25-20-F1	25	pre-treatment	2016-04-18	25	20	20F1	expt sheep	F1	Front left	front foot	left	foot	0	0	0	0	15.1073	0	0	0	0	0	1	1	3	0	0	no disease		1	0				0		0	0	0	0	20562	0	0	0	0	1.20702	0.702066	no disease
1	41-4-F4	41	pre-treatment	2016-06-06	41	4	4F4	expt sheep	F4	Back right	back foot	right	foot	23.4195	0	0	0.795416	72.9577	1	0	0	0	0	1	1	3	3	0	no disease		0			0		0		0	0	0	0	20611	1.38774	0	0	0.254165	1.86898	1.39066	no disease
1	15-11-F3	15	pre-treatment	2016-03-14	15	11	11F3	expt sheep	F3	Back left	back foot	left	foot	0	0	0	0	0	0	0	0	0	0	0	0	2	0	0	no disease		0				0	0		0	0	0	0	20527	0	0	0	0	0		scald
1	23-25-F2	23	pre-treatment	2016-04-11	23	25	25F2	expt sheep	F2	Front right	front foot	right	foot	31.0293	0	0	0	9.73748	1	0	0	0	0	0	0	4	0	0	no disease		0		0			0		0	0	0	0	20555	1.50555	0	0	0	1.0309	0.511325	no disease
1	21-25-F3	21	pre-treatment	2016-04-04	21	25	25F3	expt sheep	F3	Back left	back foot	left	foot	0	0	0	0	0	0	0	0	0	0	0	0	4	0	0	no disease		1				0	0		0	0	0	0	20548	0	0	0	0	0		no disease
1	31-11-F3	31	pre-treatment	2016-05-09	31	11	11F3	expt sheep	F3	Back left	back foot	left	foot	217.886	10954.2	0	0	206.253	1	1	1	0	0	1	1	3	0	0	no disease		0				0	0		0	0	0	0	20583	2.34022	4.03962	0	0	2.3165	1.83728	scald
0	35-23-F2	35	pre-treatment	2016-05-23	35	23	23F2	expt sheep	F2	Front right	front foot	right	foot	0	0	0	0	35.5635	1	0	0	0	0	1	1	2	3	0	no disease		0		0			0		0	0	0	0	20597	0	0	0	0	1.56305	1.07388	no disease
1	19-22-F2	19	pre-treatment	2016-03-28	19	22	22F2	expt sheep	F2	Front right	front foot	right	foot	0	0	0	0	0	0	0	0	0	0	0	0	4	0	0	no disease		0		0			0		0	0	0	0	20541	0	0	0	0	0		no disease
1	17-8-F4	17	pre-treatment	2016-03-21		8	8F4	expt sheep	F4	Back right	back foot	right	foot	0	0	0	0	0	0	0	0	0	0	0	0			0	no disease					0		0		0	0	0	0		0	0	0	0	0		scald
1	17-29-F2	17	pre-treatment	2016-03-21	17	29	29F2	expt sheep	F2	Front right	front foot	right	foot	40.9865	0	53.8836	4.43927	10.9692	1	0	0	1	0	1	1	4	0	0	no disease		1		0			0		0	0	0	0	20534	1.62311	0	1.73944	0.735541	1.07806	1.36356	no disease
1	43-4-F1	43	post-treatment	2016-06-13	43	4	4F1	expt sheep	F1	Front left	front foot	left	foot	23253.7	46045	72867.4	5289.32	13708.9	1	1	1	1	1	1	1	3	3	fr&CODD	CODD	CODD & footrot	1	2				2	codd1-4	0	0	1	0	20618	4.36651	4.66319	4.86254	3.72348	4.13703	4.48603	codd
1	41-6-F4	41	pre-treatment	2016-06-06	41	6	6F4	expt sheep	F4	Back right	back foot	right	foot	0	0	0	0	0	0	0	0	0	0	0	0	2	3	0	no disease		0			0		0		0	0	0	0	20611	0	0	0	0	0		no disease
1	9-16-F1	9	pre-treatment	2016-02-22	9	16	16F1	expt sheep	F1	Front left	front foot	left	foot	17.8576	0	37.5801	0	8.41201	1	0	0	1	0	0	1	4	0	0	no disease		1	0				0		0	0	0	0	20506	1.27549	0	1.58636	0	0.973682	1.18556	no disease
1	13-10-F1	13	pre-treatment	2016-03-07	13	10	10F1	expt sheep	F1	Front left	front foot	left	foot	0	0	0	0	0	0	0	0	0	0	0	0	3	0	0	no disease		1	0				0		0	0	0	0	20520	0	0	0	0	0		no disease
1	41-10-F4	41	pre-treatment	2016-06-06	41	10	10F4	expt sheep	F4	Back right	back foot	right	foot	51980.8	8635.21	420092	245404	58279.9	1	1	1	1	1	1	1	2	3	fr&CODD	CODD	CODD & footrot	0			2		2	codd1-4	0	0	1	0	20611	4.71585	3.93632	5.62335	5.38988	4.76553	5.38248	codd
1	29-17-F1	29	pre-treatment	2016-05-03	29	17	17F1	expt sheep	F1	Front left	front foot	left	foot	20.0705	0	25.7456	0	0	1	0	0	0	0	0	0	3	0	0	no disease		1	0				0		0	0	0	0	20577	1.32368	0	1.42725	0	0	0.933582	no disease
1	38-8-F1	38	pre-treatment	2016-05-31	38	8	8F1	expt sheep	F1	Front left	front foot	left	foot	0	0	0	0	0	0	0	0	0	0	0	0	2	3	0	no disease		1	0				0		0	0	0	0	20605	0	0	0	0	0		no disease
1	29-23-F4	29	pre-treatment	2016-05-03	29	23	23F4	expt sheep	F4	Back right	back foot	right	foot	7282.45	0	454302	20551.9	17737.8	1	1	0	1	1	1	1	2	3	footrot	FR		1			0		0		0	1	0	0	20577	3.86234	0	5.65735	4.31287	4.24893	5.21537	codd
0	35-4-F3	35	pre-treatment	2016-05-23	35	4	4F3	expt sheep	F3	Back left	back foot	left	foot	20.9693	116.412	0	17.5384	0	1	0	1	0	0	0	0	2	3	0	no disease		0				0	0		0	0	0	0	20597	1.34182	2.06971	0	1.26807	0	0.766868	no disease
1	38-19-F1	38	pre-treatment	2016-05-31	38	19	19F1	expt sheep	F1	Front left	front foot	left	foot	0	0	0	0	6.94232	0	0	0	0	0	0	0	2	0	0	no disease		1	0				0		0	0	0	0	20605	0	0	0	0	0.899948	0.364384	no disease
1	21-28-F4	21	pre-treatment	2016-04-04	21	28	28F4	expt sheep	F4	Back right	back foot	right	foot	0	55.5058	0	0	10.3696	1	0	0	0	0	1	1	4	0	overgrown	other		1			0		0		0	0	0	1	20548	0	1.75209	0	0	1.05574	0.53864	scald
1	43-15-F2	43	post-treatment	2016-06-13	43	15	15F2	expt sheep	F2	Front right	front foot	right	foot	12940.2	466309	72242.9	221.006	56176.1	1	1	1	1	1	1	1	2	3	fr&CODD	CODD	CODD & footrot	1		1			1	codd1-4	0	0	1	0	20618	4.11197	5.66867	4.8588	2.34637	4.74956	4.63226	codd
1	5-14-F4	5	pre-treatment	2016-02-08	5	14	14F4	expt sheep	F4	Back right	back foot	right	foot	0	0	0	0	0	0	0	0	0	0	0	0	3	0	0	no disease		1			0		0		0	0	0	0	20492	0	0	0	0	0		codd
1	11-13-F4	11	pre-treatment	2016-02-29	11	13	13F4	expt sheep	F4	Back right	back foot	right	foot	0	0	0	0	0	0	0	0	0	0	0	0	3	0	0	no disease		0			0		0		0	0	0	0	20513	0	0	0	0	0		no disease
1	38-8-F3	38	pre-treatment	2016-05-31	38	8	8F3	expt sheep	F3	Back left	back foot	left	foot	1803.72	33212.8	9739.34	3547.48	9825.76	1	1	1	1	1	1	1	2	3	CODD	CODD	CODD only	1				3	3	codd1-4	0	0	1	0	20605	3.25641	4.52132	3.98857	3.55004	3.99241	3.88673	codd
1	38-29-F4	38	pre-treatment	2016-05-31	38	29	29F4	expt sheep	F4	Back right	back foot	right	foot	0	0	25.6009	0	0	1	0	0	0	0	0	0	3	0	0	no disease		1			0		0		0	0	0	0	20605	0	0	1.4249	0	0	0.931134	scald
1	9-3-F2	9	pre-treatment	2016-02-22	9	3	3F2	expt sheep	F2	Front right	front foot	right	foot	0	0	0	0	0	0	0	0	0	0	0	0	4	0	0	no disease		1					0		0	0	0	0	20506	0	0	0	0	0		codd
1	35-12-F2	35	pre-treatment	2016-05-23	35	12	12F2	expt sheep	F2	Front right	front foot	right	foot	239.823	63440.2	5987.59	571.002	2162.28	1	1	1	1	1	1	1	2	3	fr&CODD	CODD	CODD & footrot	0		1			1	codd1-4	0	0	1	0	20597	2.3817	4.80237	3.77732	2.7574	3.33511	3.46344	codd
1	19-2-F4	19	pre-treatment	2016-03-28	19	2	2F4	expt sheep	F4	Back right	back foot	right	foot	34.1133	0	0	0	0	1	0	0	0	0	0	0	4	0	0	no disease		0			0		0		0	0	0	0	20541	1.54547	0	0	0	0		footrot
0	35-5-F1	35	pre-treatment	2016-05-23	35	5	5F1	expt sheep	F1	Front left	front foot	left	foot	106840	0	0	106851	0	1	1	0	0	1	0	1	2	3	fr&CODD	CODD	CODD & footrot	0	1				1	codd1-4	0	0	1	0	20597	5.02874	0	0	5.02878	0	4.55166	codd
1	25-10-F1	25	pre-treatment	2016-04-18	25	10	10F1	expt sheep	F1	Front left	front foot	left	foot	0	0	0	0	0	0	0	0	0	0	0	0	3	0	0	no disease		1	0				0		0	0	0	0	20562	0	0	0	0	0		no disease
1	38-16-F4	38	pre-treatment	2016-05-31	38	16	16F4	expt sheep	F4	Back right	back foot	right	foot	42.6467	0	0	54.9988	22.9978	1	0	0	0	1	1	1	3	0	0	no disease		1			0		0		0	0	0	0	20605	1.63995	0	0	1.74818	1.38017	1.41495	no disease
1	13-2-F4	13	pre-treatment	2016-03-07	13	2	2F4	expt sheep	F4	Back right	back foot	right	foot	0	0	0	0	0	0	0	0	0	0	0	0	3	0	0	no disease		1			0		0		0	0	0	0	20520	0	0	0	0	0		footrot
1	23-15-F2	23	pre-treatment	2016-04-11	23	15	15F2	expt sheep	F2	Front right	front foot	right	foot	18737.3	842870	96017.4	17684.9	40106.6	1	1	1	1	1	1	1	3	3	fr&CODD	CODD	CODD & footrot	0		1			1	codd1-4	0	0	1	0	20555	4.27273	5.92576	4.98235	4.24763	4.60323	4.70986	codd
1	51-28-F1	51	post-treatment	2016-07-11	51	28	28F1	expt sheep	F1	Front left	front foot	left	foot	0	0	0	0	9.60181	0	0	0	0	0	0	0	3	0	0	no disease		0	0				0		0	0	0	0	20646	0	0	0	0	1.02538	0.505232	no disease
0	13-6-F3	13	pre-treatment	2016-03-07	13	6	6F3	expt sheep	F3	Back left	back foot	left	foot	28.0153	0	8.07867	0	0	1	0	0	0	0	0	0	3	0	0	no disease		1				0	0		0	0	0	0	20520	1.46263	0	0.958022	0	0	0.430218	no disease
1	35-7-F1	35	pre-treatment	2016-05-23	35	7	7F1	expt sheep	F1	Front left	front foot	left	foot	0	4021.41	15.8716	4.4354	12.7366	1	0	1	0	0	1	1	2	3	0	no disease		0	0				0		0	0	0	0	20597	0	3.60449	1.22716	0.735231	1.13788	1.04197	codd
1	27-7-F2	27	pre-treatment	2016-04-25	27	7	7F2	expt sheep	F2	Front right	front foot	right	foot	66645.3	28555.4	153583	1008.68	45986.6	1	1	1	1	1	1	1	3	3	fr&CODD	CODD	CODD & footrot	0		1			1	codd1-4	0	0	1	0	20569	4.82378	4.4557	5.18635	3.00418	4.66264	4.82516	codd
1	43-6-F2	43	post-treatment	2016-06-13	43	6	6F2	expt sheep	F2	Front right	front foot	right	foot	0	0	0	0	0	0	0	0	0	0	0	0	2	3	0	no disease		1		0			0		0	0	0	0	20618	0	0	0	0	0		footrot
1	38-3-F2	38	pre-treatment	2016-05-31	38	3	3F2	expt sheep	F2	Front right	front foot	right	foot	2455.8	237.704	28025	18089.9	1458.5	1	1	1	1	1	1	1	3	3	footrot	FR		1		0			0		0	1	0	0	20605	3.39037	2.37786	4.44756	4.25746	3.16421	4.20024	codd
1	33-15-F2	33	pre-treatment	2016-05-16	33	15	15F2	expt sheep	F2	Front right	front foot	right	foot	3833.58	242658	3000.05	66281.9	10187.9	1	1	1	1	1	1	1	2	3	fr&CODD	CODD	CODD & footrot	1		1			1	codd1-4	0	0	1	0	20590	3.58372	5.385	3.47727	4.8214	4.00813	4.42308	codd
0	35-22-F4	35	pre-treatment	2016-05-23	35	22	22F4	expt sheep	F4	Back right	back foot	right	foot	0	0	35.0884	0	0	1	0	0	1	0	0	1	3	0	0	no disease		0			0		0		0	0	0	0	20597	0	0	1.55737	0	0	1.06804	no disease
1	13-4-F2	13	pre-treatment	2016-03-07	13	4	4F2	expt sheep	F2	Front right	front foot	right	foot	16.9404	1003.49	0	0	4.88491	1	0	1	0	0	0	0	3	0	0	no disease		1		0			0		0	0	0	0	20520	1.25383	3.00195	0	0	0.76974	0.211735	scald
1	11-3-F3	11	pre-treatment	2016-02-29	11	3	3F3	expt sheep	F3	Back left	back foot	left	foot	39.0848	0	0	42.7539	6.22629	1	0	0	0	1	0	1	4	0	0	no disease		0				0	0		0	0	0	0	20513	1.60298	0	0	1.64102	0.858916	1.2129	no disease
1	25-23-F4	25	pre-treatment	2016-04-18	25	23	23F4	expt sheep	F4	Back right	back foot	right	foot	179576	0	1.45767e+06	94369.3	97195	1	1	0	1	1	1	1	2	3	fr&CODD	CODD	CODD & footrot	1			1		1	codd1-4	0	0	1	0	20562	5.25425	0	6.16366	4.97484	4.98765	5.74016	codd
1	33-12-F3	33	pre-treatment	2016-05-16	33	12	12F3	expt sheep	F3	Back left	back foot	left	foot	1951.78	8499.28	68510.6	5241.47	7436.63	1	1	1	1	1	1	1	2	3	fr&CODD	CODD	CODD & footrot	1				1	1	codd1-4	0	0	1	0	20590	3.29065	3.92943	4.83576	3.71954	3.87143	4.43237	codd
1	51-17-F2	51	post-treatment	2016-07-11		17	17F2	expt sheep	F2	Front right	front foot	right	foot	0	8862.99	0	0	49475.1	1	0	1	0	0	1	1			CODD	CODD	CODD only			1			1	codd1-4	0	0	1	0		0	3.94763	0	0	4.6944	4.21727	codd
1	5-2-F2	5	pre-treatment	2016-02-08	5	2	2F2	expt sheep	F2	Front right	front foot	right	foot	0	0	0	0	0	0	0	0	0	0	0	0	3	0	0	no disease		1		0			0		0	0	0	0	20492	0	0	0	0	0		codd
1	19-9-F3	19	pre-treatment	2016-03-28	19	9	9F3	expt sheep	F3	Back left	back foot	left	foot	0	0	0	0	4.39306	0	0	0	0	0	0	0	3	0	0	no disease		0				0	0		0	0	0	0	20541	0	0	0	0	0.731835	0.165646	no disease
1	25-2-F1	25	pre-treatment	2016-04-18	25	2	2F1	expt sheep	F1	Front left	front foot	left	foot	0	0	23.8445	0	0	1	0	0	0	0	0	0	3	2	overgrown	other		1	0				0		0	0	0	1	20562	0	0	1.39523	0	0	0.900266	footrot
1	25-15-F1	25	pre-treatment	2016-04-18	25	15	15F1	expt sheep	F1	Front left	front foot	left	foot	756.63	478887	639.605	201.926	3136.56	1	1	1	1	1	1	1	2	3	fr&CODD	CODD	CODD & footrot	1	1				1	codd1-4	0	0	1	0	20562	2.87946	5.68023	2.80659	2.30734	3.49659	3.12255	codd
1	41-12-F1	41	pre-treatment	2016-06-06	41	12	12F1	expt sheep	F1	Front left	front foot	left	foot	0	0	0	0	4.12334	0	0	0	0	0	0	0	2	3	0	no disease		0	0				0		0	0	0	0	20611	0	0	0	0	0.709553	0.138128	no disease
1	33-5-F2	33	pre-treatment	2016-05-16	33	5	5F2	expt sheep	F2	Front right	front foot	right	foot	231137	33659.7	247414	4956.38	35420.8	1	1	1	1	1	1	1	2	3	CODD	CODD	CODD only	1		1			1	codd1-4	0	0	1	0	20590	5.36387	4.52712	5.39343	3.69525	4.54927	4.98196	codd
1	35-15-F2	35	pre-treatment	2016-05-23	35	15	15F2	expt sheep	F2	Front right	front foot	right	foot	1228.06	52034.9	4072.34	2166.43	14444.2	1	1	1	1	1	1	1	2	3	fr&CODD	CODD	CODD & footrot	0		1			1	codd1-4	0	0	1	0	20597	3.08957	4.7163	3.60995	3.33594	4.15972	3.83849	codd
0	3-40-F2	3	pre-treatment	2016-02-03	3	40	40F2	source sheep	F2	Front right	front foot	right	foot	0	0	0	0	0	0	0	0	0	0	0	0	1	3	0	no disease		1		0			0		0	0	0	0	20487	0	0	0	0	0
1	43-30-F3	43	post-treatment	2016-06-13	43	30	30F3	expt sheep	F3	Back left	back foot	left	foot	20.9623	0	0	4.05493	3.45218	1	0	0	0	0	0	0	2	1	0	no disease		1				0	0		0	0	0	0	20618	1.34168	0	0	0.703715	0.648573	0.398352	scald
1	41-25-F2	41	pre-treatment	2016-06-06	41	25	25F2	expt sheep	F2	Front right	front foot	right	foot	86.8903	0	28.9543	11.0372	0	1	1	0	0	0	0	0	3	0	0	no disease		0		0			0		0	0	0	0	20611	1.94394	0	1.47646	1.08053	0	1.12485	no disease
1	31-10-F2	31	pre-treatment	2016-05-09	31	10	10F2	expt sheep	F2	Front right	front foot	right	foot	45.8057	0	0	0	0	1	1	0	0	0	0	0	3	0	0	no disease		0		0			0		0	0	0	0	20583	1.6703	0	0	0	0		footrot
1	5-3-F4	5	pre-treatment	2016-02-08	5	3	3F4	expt sheep	F4	Back right	back foot	right	foot	0	0	0	0	10.2026	0	0	0	0	0	0	0	3	0	0	no disease		1			0		0		0	0	0	0	20492	0	0	0	0	1.04932	0.531589	no disease
1	38-6-F4	38	pre-treatment	2016-05-31	38	6	6F4	expt sheep	F4	Back right	back foot	right	foot	90.7855	0	64.0068	38.6008	12.0984	1	1	0	1	1	1	1	2	3	0	no disease		1			0		0		0	0	0	0	20605	1.96277	0	1.81296	1.5977	1.11722	1.58247	no disease
1	41-7-F2	41	pre-treatment	2016-06-06	41	7	7F2	expt sheep	F2	Front right	front foot	right	foot	4693.38	18105	339548	1502.57	72984.6	1	1	1	1	1	1	1	2	3	fr&CODD	CODD	CODD & footrot	0		1			1	codd1-4	0	0	1	0	20611	3.67158	4.25782	5.5309	3.17712	4.86324	5.13992	codd
1	15-13-F2	15	pre-treatment	2016-03-14	15	13	13F2	expt sheep	F2	Front right	front foot	right	foot	0	0	0	0	0	0	0	0	0	0	0	0	2	0	0	no disease		0		0			0		0	0	0	0	20527	0	0	0	0	0		no disease
1	15-11-F1	15	pre-treatment	2016-03-14	15	11	11F1	expt sheep	F1	Front left	front foot	left	foot	0	0	0	0	0	0	0	0	0	0	0	0	2	0	0	no disease		0	0				0		0	0	0	0	20527	0	0	0	0	0		scald
1	43-12-F2	43	post-treatment	2016-06-13	43	12	12F2	expt sheep	F2	Front right	front foot	right	foot	687.97	154378	48186	10946.5	7633.5	1	1	1	1	1	1	1	2	3	fr&CODD	CODD	CODD & footrot	1		2			2	codd1-4	0	0	1	0	20618	2.8382	5.18859	4.68293	4.03932	3.88278	4.34743	codd
1	23-23-F4	23	pre-treatment	2016-04-11	23	23	23F4	expt sheep	F4	Back right	back foot	right	foot	144767	0	280040	38122.9	58663.8	1	1	0	1	1	1	1	2	3	fr&scald	FR		0			0		0		0	1	0	0	20555	5.16067	0	5.44722	4.5812	4.76838	5.09902	codd
1	38-24-F1	38	pre-treatment	2016-05-31	38	24	24F1	expt sheep	F1	Front left	front foot	left	foot	0	0	0	5.60347	4.18778	0	0	0	0	0	0	0	3	0	0	no disease		1	0				0		0	0	0	0	20605	0	0	0	0.819772	0.714982	0.513717	no disease
1	51-7-F3	51	post-treatment	2016-07-11	51	7	7F3	expt sheep	F3	Back left	back foot	left	foot	0	0	0	0	0	0	0	0	0	0	0	0	2	0	0	no disease		0				0	0		0	0	0	0	20646	0	0	0	0	0		scald
1	5-25-F2	5	pre-treatment	2016-02-08	5	25	25F2	expt sheep	F2	Front right	front foot	right	foot	2.39372	0	0	0	0	0	0	0	0	0	0	0	3	0	0	no disease		1		0			0		0	0	0	0	20492	0.530676	0	0	0	0		no disease
1	47-6-F1	47	post-treatment	2016-06-27	47	6	6F1	expt sheep	F1	Front left	front foot	left	foot	3160.23	200806	31.8132	10.7942	533.268	1	1	1	0	0	1	1	2	3	footrot	FR		1	0				0		0	1	0	0	20632	3.49986	5.30278	1.51605	1.07167	2.72776	2.28321	codd
1	27-12-F2	27	pre-treatment	2016-04-25	27	12	12F2	expt sheep	F2	Front right	front foot	right	foot	256142	24626.9	861504	59671.2	39913.4	1	1	1	1	1	1	1	3	3	footrot	FR		0		0			0		0	1	0	0	20569	5.40848	4.39143	5.93526	4.77577	4.60113	5.50564	codd
1	47-5-F2	47	post-treatment	2016-06-27	47	5	5F2	expt sheep	F2	Front right	front foot	right	foot	0	0	0	0	0	0	0	0	0	0	0	0	2	0	CODD	CODD	CODD only	1		5			5	codd5	0	0	1	0	20632	0	0	0	0	0		codd
1	47-5-F3	47	post-treatment	2016-06-27	47	5	5F3	expt sheep	F3	Back left	back foot	left	foot	0	0	0	0	0	0	0	0	0	0	0	0	2	0	0	no disease		1				0	0		0	0	0	0	20632	0	0	0	0	0		codd
1	5-21-F1	5	pre-treatment	2016-02-08	5	21	21F1	expt sheep	F1	Front left	front foot	left	foot	0	0	0	0	0	0	0	0	0	0	0	0	3	0	0	no disease		1	0				0		0	0	0	0	20492	0	0	0	0	0		no disease
1	51-28-F3	51	post-treatment	2016-07-11	51	28	28F3	expt sheep	F3	Back left	back foot	left	foot	0	0	0	0	60.3752	1	0	0	0	0	1	1	3	0	0	no disease		0				0	0		0	0	0	0	20646	0	0	0	0	1.78799	1.30374	no disease
0	1-26-F3	1	pre-treatment	2016-01-26	1	26	26F3	expt sheep	F3	Back left	back foot	left	foot	0	0	0	0	0	0	0	0	0	0	0	0	3	0	0	no disease		1				0	0		0	0	0	0	20479	0	0	0	0	0		no disease
1	25-19-F1	25	pre-treatment	2016-04-18	25	19	19F1	expt sheep	F1	Front left	front foot	left	foot	0	0	0	0	0	0	0	0	0	0	0	0	2	0	0	no disease		1	0				0		0	0	0	0	20562	0	0	0	0	0		no disease
1	41-21-F4	41	pre-treatment	2016-06-06	41	21	21F4	expt sheep	F4	Back right	back foot	right	foot	0	0	0	0	0	0	0	0	0	0	0	0	3	0	0	no disease		0			0		0		0	0	0	0	20611	0	0	0	0	0		no disease
1	19-15-F2	19	pre-treatment	2016-03-28	19	15	15F2	expt sheep	F2	Front right	front foot	right	foot	16477.1	258651	1.34172e+06	59591.7	414239	1	1	1	1	1	1	1	3	3	fr&scald	FR		0		0			0		0	1	0	0	20541	4.21691	5.41272	6.12766	4.77519	5.61725	5.78189	codd
1	31-13-F1	31	pre-treatment	2016-05-09	31	13	13F1	expt sheep	F1	Front left	front foot	left	foot	0	61.9428	0	0	0	1	0	0	0	0	0	0	3	0	0	no disease		0	0				0		0	0	0	0	20583	0	1.79895	0	0	0		no disease
1	29-10-F3	29	pre-treatment	2016-05-03	29	10	10F3	expt sheep	F3	Back left	back foot	left	foot	0	0	0	0	0	0	0	0	0	0	0	0	3	0	0	no disease		1				0	0		0	0	0	0	20577	0	0	0	0	0		no disease
1	38-26-F3	38	pre-treatment	2016-05-31	38	26	26F3	expt sheep	F3	Back left	back foot	left	foot	0	0	0	1.891	0	0	0	0	0	0	0	0	3	0	0	no disease		1				0	0		0	0	0	0	20605	0	0	0	0.461048	0	-0.20043	no disease
1	33-17-F4	33	pre-treatment	2016-05-16	33	17	17F4	expt sheep	F4	Back right	back foot	right	foot	0	0	0	0	3.14064	0	0	0	0	0	0	0	3	0	0	no disease		1			0		0		0	0	0	0	20590	0	0	0	0	0.617068	0.0198974	scald
1	25-10-F2	25	pre-treatment	2016-04-18	25	10	10F2	expt sheep	F2	Front right	front foot	right	foot	15.3706	0	0	0	8.68224	0	0	0	0	0	0	0	3	0	0	no disease		1		0			0		0	0	0	0	20562	1.21407	0	0	0	0.985976	0.461511	footrot
0	29-4-F2	29	pre-treatment	2016-05-03	29	4	4F2	expt sheep	F2	Front right	front foot	right	foot	39.5169	55.2923	42.2629	0.958293	0	1	0	0	1	0	0	1	3	0	0	no disease		1		0			0		0	0	0	0	20577	1.60764	1.75045	1.63612	0.291878	0	1.15858	scald
1	29-15-F1	29	pre-treatment	2016-05-03	29	15	15F1	expt sheep	F1	Front left	front foot	left	foot	65.4461	255767	74.4506	21.5326	7238.46	1	1	1	1	0	1	1	2	3	footrot	FR		1	0				0		0	1	0	0	20577	1.82247	5.40785	1.87766	1.35281	3.85971	3.38825	codd
1	25-13-F4	25	pre-treatment	2016-04-18	25	13	13F4	expt sheep	F4	Back right	back foot	right	foot	0	0	0	0	0	0	0	0	0	0	0	0	3	0	0	no disease		1			0		0		0	0	0	0	20562	0	0	0	0	0		no disease
1	41-6-F1	41	pre-treatment	2016-06-06	41	6	6F1	expt sheep	F1	Front left	front foot	left	foot	35673	135892	1.02662e+06	55215.3	84914.5	1	1	1	1	1	1	1	2	3	fr&CODD	CODD	CODD & footrot	0	1				1	codd1-4	0	0	1	0	20611	4.55235	5.1332	6.01141	4.74207	4.92899	5.58986	codd
1	21-4-F3	21	pre-treatment	2016-04-04	21	4	4F3	expt sheep	F3	Back left	back foot	left	foot	0	0	0	0	0	0	0	0	0	0	0	0	3	0	0	no disease		1				0	0		0	0	0	0	20548	0	0	0	0	0		no disease
1	27-27-F2	27	pre-treatment	2016-04-25	27	27	27F2	expt sheep	F2	Front right	front foot	right	foot	0	0	0	0	8.20004	0	0	0	0	0	0	0	3	0	0	no disease		0		0			0		0	0	0	0	20569	0	0	0	0	0.96379	0.436695	no disease
1	47-13-F3	47	post-treatment	2016-06-27	47	13	13F3	expt sheep	F3	Back left	back foot	left	foot	0	0	0	0	0	0	0	0	0	0	0	0	3	0	0	no disease		1				0	0		0	0	0	0	20632	0	0	0	0	0		no disease
1	41-15-F2	41	pre-treatment	2016-06-06	41	15	15F2	expt sheep	F2	Front right	front foot	right	foot	450.896	464958	630.095	2172.39	6222.23	1	1	1	1	1	1	1	2	3	footrot	FR		0		0			0		0	1	0	0	20611	2.65504	5.66741	2.80009	3.33714	3.79402	3.47831	codd
1	21-30-F4	21	pre-treatment	2016-04-04	21	30	30F4	expt sheep	F4	Back right	back foot	right	foot	16.1209	0	0	0	9.35731	0	0	0	0	0	0	0	3	0	0	no disease		1			0		0		0	0	0	0	20548	1.23353	0	0	0	1.01525	0.49403	scald
1	51-2-F1	51	post-treatment	2016-07-11		2	2F1	expt sheep	F1	Front left	front foot	left	foot	0	0	0	0	0	0	0	0	0	0	0	0			0	no disease			0				0		0	0	0	0		0	0	0	0	0		footrot
1	41-9-F1	41	pre-treatment	2016-06-06	41	9	9F1	expt sheep	F1	Front left	front foot	left	foot	83.5673	947.442	35.8077	4.02877	24.98	1	1	1	1	0	1	1	3	0	CODD	CODD	CODD only	0	5				5	codd5	0	0	1	0	20611	1.9272	2.97701	1.56594	0.701462	1.41464	1.33456	codd
1	13-20-F2	13	pre-treatment	2016-03-07	13	20	20F2	expt sheep	F2	Front right	front foot	right	foot	13.127	0	0	8.00277	0	0	0	0	0	0	0	0	3	0	0	no disease		1		0			0		0	0	0	0	20520	1.15005	0	0	0.954376	0	0.426119	no disease
1	23-17-F3	23	pre-treatment	2016-04-11	23	17	17F3	expt sheep	F3	Back left	back foot	left	foot	0	0	0	0	0	0	0	0	0	0	0	0	3	0	0	no disease		0				0	0		0	0	0	0	20555	0	0	0	0	0		scald
1	31-28-F4	31	pre-treatment	2016-05-09	31	28	28F4	expt sheep	F4	Back right	back foot	right	foot	0	0	0	0	0	0	0	0	0	0	0	0	3	0	0	no disease		0			0		0		0	0	0	0	20583	0	0	0	0	0		scald
1	11-22-F2	11	pre-treatment	2016-02-29	11	22	22F2	expt sheep	F2	Front right	front foot	right	foot	0	0	0	0	0	0	0	0	0	0	0	0	4	0	0	no disease		0		0			0		0	0	0	0	20513	0	0	0	0	0		no disease
1	21-23-F4	21	pre-treatment	2016-04-04	21	23	23F4	expt sheep	F4	Back right	back foot	right	foot	796496	0	38261.2	1932.78	7950.93	1	1	0	1	1	1	1	2	3	fr&scald	FR		1			0		0		0	1	0	0	20548	5.90118	0	4.58277	3.28641	3.90047	4.20543	codd
1	41-15-F3	41	pre-treatment	2016-06-06	41	15	15F3	expt sheep	F3	Back left	back foot	left	foot	671.26	563970	252.261	0	1471.96	1	1	1	1	0	1	1	2	3	footrot	FR		0				0	0		0	1	0	0	20611	2.82754	5.75126	2.40357	0	3.16819	2.75947	codd
1	21-14-F4	21	pre-treatment	2016-04-04	21	14	14F4	expt sheep	F4	Back right	back foot	right	foot	21.2096	0	31.539	0	10.2947	1	0	0	0	0	0	0	3	0	0	no disease		1			0		0		0	0	0	0	20548	1.34654	0	1.5124	0	1.05288	1.14441	codd
1	23-25-F3	23	pre-treatment	2016-04-11	23	25	25F3	expt sheep	F3	Back left	back foot	left	foot	20.2152	0	0	0	8.3026	1	0	0	0	0	0	0	4	0	0	no disease		0				0	0		0	0	0	0	20555	1.32665	0	0	0	0.968604	0.442093	no disease
1	27-8-F3	27	pre-treatment	2016-04-25	27	8	8F3	expt sheep	F3	Back left	back foot	left	foot	15327.4	17634.2	953.052	43150.5	17488.9	1	1	1	1	1	1	1	3	3	scald	ID		0				0	0		1	0	0	0	20569	4.1855	4.24638	2.97957	4.635	4.24279	4.31241	codd
1	13-30-F4	13	pre-treatment	2016-03-07	13	30	30F4	expt sheep	F4	Back right	back foot	right	foot	11.1966	0	0	0	6.13626	0	0	0	0	0	0	0	3	0	0	no disease		1			0		0		0	0	0	0	20520	1.08624	0	0	0	0.853471	0.310782	scald
1	21-4-F1	21	pre-treatment	2016-04-04	21	4	4F1	expt sheep	F1	Front left	front foot	left	foot	0	0	0	0	2.52336	0	0	0	0	0	0	0	3	0	0	no disease		1	0				0		0	0	0	0	20548	0	0	0	0	0.546957	-0.0751414	codd
1	7-27-F3	7	pre-treatment	2016-02-15	7	27	27F3	expt sheep	F3	Back left	back foot	left	foot	25.3718	0	52.5867	1.622	10.2184	1	0	0	1	0	0	1	4	0	0	no disease		0					0		0	0	0	0	20499	1.42114	0	1.72906	0.418633	1.04993	1.33195	no disease
1	15-15-F2	15	pre-treatment	2016-03-14	15	15	15F2	expt sheep	F2	Front right	front foot	right	foot	27052.9	149013	0	0	2578.93	1	1	1	0	0	1	1	2	2	fr&scald	FR		0		0			0		0	1	0	0	20527	4.43223	5.17323	0	0	3.41161	2.93432	codd
1	27-5-F2	27	pre-treatment	2016-04-25	27	5	5F2	expt sheep	F2	Front right	front foot	right	foot	82766.4	26773.4	10951.6	13304.8	2933.07	1	1	1	1	1	1	1	3	1	scald	ID		0		0			0		1	0	0	0	20569	4.91786	4.42772	4.03952	4.12404	3.46747	3.95728	codd
1	9-12-F3	9	pre-treatment	2016-02-22	9	12	12F3	expt sheep	F3	Back left	back foot	left	foot	46.8406	0	57.6919	4.97798	10.6679	1	1	0	1	0	1	1	3	0	0	no disease		1					0		0	0	0	0	20506	1.6798	0	1.76858	0.776554	1.06699	1.38821	codd
1	41-2-F3	41	pre-treatment	2016-06-06	41	2	2F3	expt sheep	F3	Back left	back foot	left	foot	52.6031	27890.3	0	2.00393	23.5992	1	1	1	0	0	1	1	3	2	footrot	FR		0				0	0		0	1	0	0	20611	1.72919	4.44547	0	0.47769	1.39092	0.931171	footrot
1	47-9-F3	47	post-treatment	2016-06-27	47	9	9F3	expt sheep	F3	Back left	back foot	left	foot	0	0	0	0	0	0	0	0	0	0	0	0	2	0	0	no disease		1				0	0		0	0	0	0	20632	0	0	0	0	0		no disease
0	17-13-F3	17	pre-treatment	2016-03-21	17	13	13F3	expt sheep	F3	Back left	back foot	left	foot	0	0	0	0	0	0	0	0	0	0	0	0	3	0	0	no disease		1					0		0	0	0	0	20534	0	0	0	0	0		no disease
1	5-5-F1	5	pre-treatment	2016-02-08	5	5	5F1	expt sheep	F1	Front left	front foot	left	foot	0	0	345.616	0	24.2586	1	0	0	1	0	1	1	3	0	0	no disease		1	0				0		0	0	0	0	20492	0	0	2.53985	0	1.40241	2.09093	codd
0	1-14-F1	1	pre-treatment	2016-01-26	1	14	14F1	expt sheep	F1	Front left	front foot	left	foot	0	0	0	0	3.7531	0	0	0	0	0	0	0	2	0	0	no disease		1	0				0		0	0	0	0	20479	0	0	0	0	0.676977	0.0972683	scald
1	29-9-F1	29	pre-treatment	2016-05-03	29	9	9F1	expt sheep	F1	Front left	front foot	left	foot	4612.81	5112.49	101356	5047.21	20112.8	1	1	1	1	1	1	1	2	2	footrot	FR		1	0				0		0	1	0	0	20577	3.66406	3.70872	5.00585	3.70314	4.30349	4.62502	codd
1	19-20-F1	19	pre-treatment	2016-03-28	19	20	20F1	expt sheep	F1	Front left	front foot	left	foot	0	0	0	0	0	0	0	0	0	0	0	0	3	0	0	no disease		0	0				0		0	0	0	0	20541	0	0	0	0	0		no disease
1	7-28-F2	7	pre-treatment	2016-02-15	7	28	28F2	expt sheep	F2	Front right	front foot	right	foot	10.3362	0	0	0	0	0	0	0	0	0	0	0	4	0	0	no disease		0		0			0		0	0	0	0	20499	1.05447	0	0	0	0		footrot
1	35-17-F1	35	pre-treatment	2016-05-23	35	17	17F1	expt sheep	F1	Front left	front foot	left	foot	0	0	30.2249	2.57204	0	1	0	0	0	0	0	0	3	0	0	no disease		0	0				0		0	0	0	0	20597	0	0	1.4945	0.552916	0	1.03871	no disease
1	9-9-F1	9	pre-treatment	2016-02-22	9	9	9F1	expt sheep	F1	Front left	front foot	left	foot	0	0	0	0	0	0	0	0	0	0	0	0	3	0	0	no disease		1	0				0		0	0	0	0	20506	0	0	0	0	0		codd
1	5-4-F4	5	pre-treatment	2016-02-08	5	4	4F4	expt sheep	F4	Back right	back foot	right	foot	0	0	0	7.42585	8.14685	0	0	0	0	0	0	0	3	0	0	no disease		1			0		0		0	0	0	0	20492	0	0	0	0.925614	0.961272	0.715243	no disease
1	25-7-F4	25	pre-treatment	2016-04-18	25	7	7F4	expt sheep	F4	Back right	back foot	right	foot	0	0	0	0	0	0	0	0	0	0	0	0	3	3	0	no disease		1			0		0		0	0	0	0	20562	0	0	0	0	0		scald
1	21-15-F2	21	pre-treatment	2016-04-04	21	15	15F2	expt sheep	F2	Front right	front foot	right	foot	14652	261763	77410.9	41943.4	13477	1	1	1	1	1	1	1	3	3	footrot	FR		1		0			0		0	1	0	0	20548	4.16593	5.41791	4.88881	4.62267	4.12963	4.64618	codd
1	25-22-F1	25	pre-treatment	2016-04-18	25	22	22F1	expt sheep	F1	Front left	front foot	left	foot	0	0	0	0	0	0	0	0	0	0	0	0	4	0	0	no disease		1	0				0		0	0	0	0	20562	0	0	0	0	0		scald
0	1-11-F2	1	pre-treatment	2016-01-26	1	11	11F2	expt sheep	F2	Front right	front foot	right	foot	0	0	12.0662	0	14.5972	0	0	0	0	0	1	1	2	0	0	no disease		1		0			0		0	0	0	0	20479	0	0	1.11615	0	1.19305	0.948794	scald
1	21-23-F1	21	pre-treatment	2016-04-04	21	23	23F1	expt sheep	F1	Front left	front foot	left	foot	0	0	0	0	0	0	0	0	0	0	0	0	2	3	0	no disease		1	0				0		0	0	0	0	20548	0	0	0	0	0		no disease
1	27-2-F2	27	pre-treatment	2016-04-25	27	2	2F2	expt sheep	F2	Front right	front foot	right	foot	42885.1	13468.9	13982.3	15043.1	6944.05	1	1	1	1	1	1	1	3	3	footrot	FR		0		0			0		0	1	0	0	20569	4.63232	4.12937	4.14561	4.17737	3.84168	4.07881	codd
1	21-8-F4	21	pre-treatment	2016-04-04	21	8	8F4	expt sheep	F4	Back right	back foot	right	foot	0	0	0	0	0	0	0	0	0	0	0	0	3	0	overgrown	other		1			0		0		0	0	0	1	20548	0	0	0	0	0		scald
1	11-4-F1	11	pre-treatment	2016-02-29	11	4	4F1	expt sheep	F1	Front left	front foot	left	foot	0	0	0	0	6.5742	0	0	0	0	0	0	0	4	0	overgrown	other		0	0				0		0	0	0	1	20513	0	0	0	0	0.879337	0.340722	codd
1	21-16-F1	21	pre-treatment	2016-04-04	21	16	16F1	expt sheep	F1	Front left	front foot	left	foot	35.507	0	0	0	0	1	0	0	0	0	0	0	4	0	0	no disease		1	0				0		0	0	0	0	20548	1.56238	0	0	0	0		no disease
1	38-5-F2	38	pre-treatment	2016-05-31	38	5	5F2	expt sheep	F2	Front right	front foot	right	foot	3664.12	66.591	105998	6777.81	3637.62	1	1	1	1	1	1	1	2	3	CODD	CODD	CODD only	1		3			3	codd1-4	0	0	1	0	20605	3.56409	1.82989	5.0253	3.83115	3.56094	4.58888	codd
0	1-19-F3	1	pre-treatment	2016-01-26	1	19	19F3	expt sheep	F3	Back left	back foot	left	foot	0	0	0	0	0	0	0	0	0	0	0	0	2	0	WL	other		1				0	0		0	0	0	1	20479	0	0	0	0	0		no disease
1	35-2-F3	35	pre-treatment	2016-05-23	35	2	2F3	expt sheep	F3	Back left	back foot	left	foot	0	7236.78	40.8815	0	1.16108	1	0	1	1	0	0	1	2	3	scald	ID		0				0	0		1	0	0	0	20597	0	3.85961	1.62202	0	0.334671	1.14657	footrot
0	3-38-F1	3	pre-treatment	2016-02-02	3	38	38F1	source sheep	F1	Front left	front foot	left	foot	0	0	48.0443	0	4.22842	1	0	0	1	0	0	1	2	3	0	no disease		1	0				0		0	0	0	0	20486	0	0	1.69059	0	0.718371	1.24115
1	13-18-F3	13	pre-treatment	2016-03-07	13	18	18F3	expt sheep	F3	Back left	back foot	left	foot	77.2933	0	0	7.48634	0	1	1	0	0	0	0	0	3	0	0	no disease		1				0	0		0	0	0	0	20520	1.89372	0	0	0.928721	0	0.397148	no disease
1	33-5-F4	33	pre-treatment	2016-05-16	33	5	5F4	expt sheep	F4	Back right	back foot	right	foot	47140.8	12231.6	858980	40792.6	23530.3	1	1	1	1	1	1	1	2	3	scald	ID		1			0		0		1	0	0	0	20590	4.67341	4.08752	5.93398	4.61059	4.37165	5.48822	codd
1	7-17-F4	7	pre-treatment	2016-02-15		17	17F4	expt sheep	F4	Back right	back foot	right	foot	0	0	0	0	0	0	0	0	0	0	0	0			0	no disease					0		0		0	0	0	0		0	0	0	0	0		scald
1	33-2-F3	33	pre-treatment	2016-05-16	33	2	2F3	expt sheep	F3	Back left	back foot	left	foot	47.5856	18047.1	0	3.96117	0	1	1	1	0	0	0	0	3	3	scald	ID		1				0	0		1	0	0	0	20590	1.68651	4.25643	0	0.695584	0	0.120702	footrot
1	38-11-F2	38	pre-treatment	2016-05-31	38	11	11F2	expt sheep	F2	Front right	front foot	right	foot	1027.18	66845.1	0	30.44	289.437	1	1	1	0	1	1	1	3	0	scald	ID		1		0			0		1	0	0	0	20605	3.01207	4.82508	0	1.49748	2.46305	2.02786	scald
1	38-9-F4	38	pre-treatment	2016-05-31	38	9	9F4	expt sheep	F4	Back right	back foot	right	foot	0	0	0	0	0	0	0	0	0	0	0	0	3	1	0	no disease		1			0		0		0	0	0	0	20605	0	0	0	0	0		no disease
0	1-30-F3	1	pre-treatment	2016-01-26	1	30	30F3	expt sheep	F3	Back left	back foot	left	foot	0	0	0	0	0	0	0	0	0	0	0	0	2	0	0	no disease		1				0	0		0	0	0	0	20479	0	0	0	0	0		scald
1	43-12-F3	43	post-treatment	2016-06-13	43	12	12F3	expt sheep	F3	Back left	back foot	left	foot	0	46456.3	10855.5	17.1339	7894.41	1	0	1	1	0	1	1	2	3	fr&CODD	CODD	CODD & footrot	1				4	4	codd1-4	0	0	1	0	20618	0	4.66705	4.03569	1.25849	3.89737	3.79627	codd
0	35-22-F1	35	pre-treatment	2016-05-23	35	22	22F1	expt sheep	F1	Front left	front foot	left	foot	0	0	0	0	0	0	0	0	0	0	0	0	3	0	0	no disease		0	0				0		0	0	0	0	20597	0	0	0	0	0		scald
1	41-16-F3	41	pre-treatment	2016-06-06	41	16	16F3	expt sheep	F3	Back left	back foot	left	foot	0	90.9059	0	0	11.6333	1	0	1	0	0	1	1	3	0	0	no disease		0				0	0		0	0	0	0	20611	0	1.96334	0	0	1.10152	0.588581	no disease
1	43-28-F1	43	post-treatment	2016-06-13	43	28	28F1	expt sheep	F1	Front left	front foot	left	foot	0	0	41.9993	0	0	1	0	0	1	0	0	1	3	3	0	no disease		1	0				0		0	0	0	0	20618	0	0	1.63346	0	0	1.14612	no disease
1	35-11-F4	35	pre-treatment	2016-05-23	35	11	11F4	expt sheep	F4	Back right	back foot	right	foot	0	0	0	0	0	0	0	0	0	0	0	0	2	0	0	no disease		0			0		0		0	0	0	0	20597	0	0	0	0	0		no disease
0	3-40-F1	3	pre-treatment	2016-02-03	3	40	40F1	source sheep	F1	Front left	front foot	left	foot	0	0	0	0	7.6354	0	0	0	0	0	0	0	1	3	0	no disease		1	0				0		0	0	0	0	20487	0	0	0	0	0.936282	0.40571
1	47-12-F4	47	post-treatment	2016-06-27	47	12	12F4	expt sheep	F4	Back right	back foot	right	foot	0	0	0	0	0	0	0	0	0	0	0	0	2	1	0	no disease		1			0		0		0	0	0	0	20632	0	0	0	0	0		no disease
1	38-20-F1	38	pre-treatment	2016-05-31	38	20	20F1	expt sheep	F1	Front left	front foot	left	foot	58.5149	0	5.35002	0	16.0233	1	1	0	0	0	1	1	3	0	0	no disease		1	0				0		0	0	0	0	20605	1.77463	0	0.802775	0	1.23104	0.852751	no disease
1	7-15-F4	7	pre-treatment	2016-02-15		15	15F4	expt sheep	F4	Back right	back foot	right	foot	0	0	0	0	0	0	0	0	0	0	0	0			0	no disease					0		0		0	0	0	0		0	0	0	0	0		footrot
1	29-11-F1	29	pre-treatment	2016-05-03	29	11	11F1	expt sheep	F1	Front left	front foot	left	foot	0	0	0	0	0	0	0	0	0	0	0	0	2	0	0	no disease		1	0				0		0	0	0	0	20577	0	0	0	0	0		scald
1	38-3-F1	38	pre-treatment	2016-05-31	38	3	3F1	expt sheep	F1	Front left	front foot	left	foot	26992.1	652.96	443915	146961	6330.65	1	1	1	1	1	1	1	3	3	footrot	FR		1	0				0		0	1	0	0	20605	4.43125	2.81555	5.6473	5.1672	3.80152	5.299	codd
1	38-5-F1	38	pre-treatment	2016-05-31	38	5	5F1	expt sheep	F1	Front left	front foot	left	foot	23790.5	4718.76	144795	11455.5	2910.12	1	1	1	1	1	1	1	2	3	CODD	CODD	CODD only	1	2				2	codd1-4	0	0	1	0	20605	4.37642	3.67392	5.16076	4.05905	3.46406	4.72471	codd
1	38-10-F1	38	pre-treatment	2016-05-31	38	10	10F1	expt sheep	F1	Front left	front foot	left	foot	24.8098	0	0	0	0	1	0	0	0	0	0	0	2	3	0	no disease		1	0				0		0	0	0	0	20605	1.41179	0	0	0	0		no disease
1	13-29-F2	13	pre-treatment	2016-03-07	13	29	29F2	expt sheep	F2	Front right	front foot	right	foot	0	0	0	0	10.7189	0	0	0	0	0	1	1	3	0	0	no disease		1		0			0		0	0	0	0	20520	0	0	0	0	1.06889	0.553031	no disease
1	43-11-F4	43	post-treatment	2016-06-13	43	11	11F4	expt sheep	F4	Back right	back foot	right	foot	0	0	0	0	15.312	0	0	0	0	0	1	1	2	1	0	no disease		1			0		0		0	0	0	0	20618	0	0	0	0	1.21251	0.70791	no disease
1	19-24-F4	19	pre-treatment	2016-03-28	19	24	24F4	expt sheep	F4	Back right	back foot	right	foot	11.1979	0	88.7572	0	3.23275	1	0	0	1	0	0	1	4	0	0	no disease		0			0		0		0	0	0	0	20541	1.08629	0	1.95307	0	0.626623	1.48662	no disease
1	7-14-F1	7	pre-treatment	2016-02-15	7	14	14F1	expt sheep	F1	Front left	front foot	left	foot	0	0	0	0	0	0	0	0	0	0	0	0	3	0	scald	ID		0	0				0		1	0	0	0	20499	0	0	0	0	0		scald
1	25-12-F3	25	pre-treatment	2016-04-18	25	12	12F3	expt sheep	F3	Back left	back foot	left	foot	41851.4	46952.2	19220.2	19892.8	9739.84	1	1	1	1	1	1	1	3	1	scald	ID		1				0	0		1	0	0	0	20562	4.62172	4.67167	4.28378	4.29872	3.9886	4.21177	codd
1	43-17-F3	43	post-treatment	2016-06-13	43	17	17F3	expt sheep	F3	Back left	back foot	left	foot	29.7229	0	68.8686	44.6237	24.6285	1	0	0	1	1	1	1	3	3	0	no disease		1				0	0		0	0	0	0	20618	1.48746	0	1.84428	1.65919	1.40872	1.66314	scald
0	1-5-F3	1	pre-treatment	2016-01-26	1	5	5F3	expt sheep	F3	Back left	back foot	left	foot	0	0	0	0	0	0	0	0	0	0	0	0	3	0	0	no disease		1				0	0		0	0	0	0	20479	0	0	0	0	0		codd
0	29-7-F1	29	pre-treatment	2016-05-03	29	7	7F1	expt sheep	F1	Front left	front foot	left	foot	0	1918.34	0	0	0	1	0	1	0	0	0	0	3	3	0	no disease		1	0				0		0	0	0	0	20577	0	3.28315	0	0	0		codd
1	19-22-F3	19	pre-treatment	2016-03-28	19	22	22F3	expt sheep	F3	Back left	back foot	left	foot	0	0	0	0	0	0	0	0	0	0	0	0	4	0	0	no disease		0				0	0		0	0	0	0	20541	0	0	0	0	0		scald
1	19-2-F1	19	pre-treatment	2016-03-28	19	2	2F1	expt sheep	F1	Front left	front foot	left	foot	0	0	0	0	0	0	0	0	0	0	0	0	4	0	0	no disease		0	0				0		0	0	0	0	20541	0	0	0	0	0		footrot
1	5-13-F2	5	pre-treatment	2016-02-08	5	13	13F2	expt sheep	F2	Front right	front foot	right	foot	18.7308	0	57.3281	17.3221	28.2685	1	0	0	1	0	1	1	2	0	0	no disease		1		0			0		0	0	0	0	20492	1.29514	0	1.76588	1.26298	1.4664	1.53537	no disease
1	43-7-F4	43	post-treatment	2016-06-13	43	7	7F4	expt sheep	F4	Back right	back foot	right	foot	0	22651.5	87.2569	26.985	15.9801	1	0	1	1	1	1	1	3	3	scald	ID		1			0		0		1	0	0	0	20618	0	4.35512	1.94575	1.44692	1.22994	1.63756	scald
1	25-2-F2	25	pre-treatment	2016-04-18	25	2	2F2	expt sheep	F2	Front right	front foot	right	foot	14483.9	15458.9	25.1275	1990.77	220.923	1	1	1	0	1	1	1	3	2	scald	ID		1		0			0		1	0	0	0	20562	4.16092	4.18921	1.4171	3.29924	2.3462	2.87251	codd
1	19-25-F1	19	pre-treatment	2016-03-28	19	25	25F1	expt sheep	F1	Front left	front foot	left	foot	0	0	0	0	2.69461	0	0	0	0	0	0	0	4	0	0	no disease		0	0				0		0	0	0	0	20541	0	0	0	0	0.567569	-0.0466249	no disease
1	7-12-F3	7	pre-treatment	2016-02-15	7	12	12F3	expt sheep	F3	Back left	back foot	left	foot	11.4995	0	0	0	3.55047	0	0	0	0	0	0	0	4	0	0	no disease		0				0	0		0	0	0	0	20499	1.09689	0	0	0	0.658056	0.0731642	codd
1	23-20-F3	23	pre-treatment	2016-04-11	23	20	20F3	expt sheep	F3	Back left	back foot	left	foot	0	0	0	5.2407	8.76101	0	0	0	0	0	0	0	3	0	0	no disease		0				0	0		0	0	0	0	20555	0	0	0	0.795234	0.989495	0.66906	no disease
1	21-24-F4	21	pre-treatment	2016-04-04	21	24	24F4	expt sheep	F4	Back right	back foot	right	foot	38.3186	0	0	0	0	1	0	0	0	0	0	0	4	0	0	no disease		1			0		0		0	0	0	0	20548	1.5946	0	0	0	0		no disease
1	13-1-F4	13	pre-treatment	2016-03-07	13	1	1F4	expt sheep	F4	Back right	back foot	right	foot	0	0	0	0	0	0	0	0	0	0	0	0	3	0	0	no disease		1			0		0		0	0	0	0	20520	0	0	0	0	0		no disease
1	23-20-F2	23	pre-treatment	2016-04-11	23	20	20F2	expt sheep	F2	Front right	front foot	right	foot	0	0	0	0	0	0	0	0	0	0	0	0	3	0	0	no disease		0		0			0		0	0	0	0	20555	0	0	0	0	0		no disease
0	7-4-F2	7	pre-treatment	2016-02-15	7	4	4F2	expt sheep	F2	Front right	front foot	right	foot	0	0	0	6.15275	7.42281	0	0	0	0	0	0	0	4	0	scald	ID		0		0			0		1	0	0	0	20499	0	0	0	0.854473	0.925457	0.655636	scald
1	17-17-F3	17	pre-treatment	2016-03-21	17	17	17F3	expt sheep	F3	Back left	back foot	left	foot	0	0	0	2.69384	5.04496	0	0	0	0	0	0	0	4	0	0	no disease		1				0	0		0	0	0	0	20534	0	0	0	0.567478	0.781393	0.411552	scald
1	47-2-F1	47	post-treatment	2016-06-27	47	2	2F1	expt sheep	F1	Front left	front foot	left	foot	0	0	0	0	0	0	0	0	0	0	0	0	3	0	0	no disease		1	0				0		0	0	0	0	20632	0	0	0	0	0		footrot
1	31-15-F3	31	pre-treatment	2016-05-09	31	15	15F3	expt sheep	F3	Back left	back foot	left	foot	65820.6	25498.9	0	0	1886.28	1	1	1	0	0	1	1	2	3	scald	ID		0				0	0		1	0	0	0	20583	4.81837	4.40654	0	0	3.27584	2.79848	codd
1	23-17-F1	23	pre-treatment	2016-04-11	23	17	17F1	expt sheep	F1	Front left	front foot	left	foot	0	0	0	0	0	0	0	0	0	0	0	0	3	0	0	no disease		0	0				0		0	0	0	0	20555	0	0	0	0	0		no disease
1	35-11-F2	35	pre-treatment	2016-05-23	35	11	11F2	expt sheep	F2	Front right	front foot	right	foot	1368.71	9482.96	0	0	0	1	1	1	0	0	0	0	2	0	0	no disease		0		0			0		0	0	0	0	20597	3.13663	3.97699	0	0	0		scald
1	15-17-F3	15	pre-treatment	2016-03-14	15	17	17F3	expt sheep	F3	Back left	back foot	left	foot	0	0	0	0	0	0	0	0	0	0	0	0	3	0	0	no disease		0				0	0		0	0	0	0	20527	0	0	0	0	0		scald
1	33-19-F3	33	pre-treatment	2016-05-16	33	19	19F3	expt sheep	F3	Back left	back foot	left	foot	0	0	0	0	0	0	0	0	0	0	0	0	2	0	0	no disease		1				0	0		0	0	0	0	20590	0	0	0	0	0		no disease
1	41-29-F2	41	pre-treatment	2016-06-06	41	29	29F2	expt sheep	F2	Front right	front foot	right	foot	145.702	135.751	35.8095	53.5048	0	1	1	1	1	1	0	1	3	0	0	no disease		0		0			0		0	0	0	0	20611	2.16644	2.13593	1.56596	1.73643	0	1.4738	no disease
1	5-23-F1	5	pre-treatment	2016-02-08	5	23	23F1	expt sheep	F1	Front left	front foot	left	foot	0	0	0	0	0	0	0	0	0	0	0	0	3	0	0	no disease		1	0				0		0	0	0	0	20492	0	0	0	0	0		no disease
1	29-14-F1	29	pre-treatment	2016-05-03	29	14	14F1	expt sheep	F1	Front left	front foot	left	foot	0	0	24.5494	0	2.26806	1	0	0	0	0	0	0	2	3	0	no disease		1	0				0		0	0	0	0	20577	0	0	1.40738	0	0.51429	0.951296	scald
1	15-20-F3	15	pre-treatment	2016-03-14	15	20	20F3	expt sheep	F3	Back left	back foot	left	foot	0	0	145.142	7.89965	4.25189	1	0	0	1	0	0	1	3	0	0	no disease		0				0	0		0	0	0	0	20527	0	0	2.16478	0.949373	0.720315	1.71959	no disease
1	33-8-F4	33	pre-treatment	2016-05-16	33	8	8F4	expt sheep	F4	Back right	back foot	right	foot	21.2688	76180.3	0	0	1727.06	1	0	1	0	0	1	1	2	3	scald	ID		1			0		0		1	0	0	0	20590	1.3477	4.88185	0	0	3.23756	2.76019	scald
1	41-14-F1	41	pre-treatment	2016-06-06	41	14	14F1	expt sheep	F1	Front left	front foot	left	foot	0	98.347	0	0	0	1	0	1	0	0	0	0	2	3	0	no disease		0	0				0		0	0	0	0	20611	0	1.99715	0	0	0		scald
1	7-22-F1	7	pre-treatment	2016-02-15	7	22	22F1	expt sheep	F1	Front left	front foot	left	foot	0	0	0	0	7.40289	0	0	0	0	0	0	0	5	0	0	no disease		0	0				0		0	0	0	0	20499	0	0	0	0	0.924429	0.39228	scald
1	15-22-F2	15	pre-treatment	2016-03-14	15	22	22F2	expt sheep	F2	Front right	front foot	right	foot	0	0	0	0	0	0	0	0	0	0	0	0	4	0	0	no disease		0		0			0		0	0	0	0	20527	0	0	0	0	0		no disease
1	33-47-F1	33	pre-treatment	2016-05-16	33	47	47F1	source sheep	F1	Front left	front foot	left	foot	0	0	0	0	0	0	0	0	0	0	0	0	3	3	0	no disease		1	0				0		0	0	0	0	20590	0	0	0	0	0
1	21-27-F4	21	pre-treatment	2016-04-04	21	27	27F4	expt sheep	F4	Back right	back foot	right	foot	27.4277	0	0	0	12.5274	1	0	0	0	0	1	1	3	0	0	no disease		1			0		0		0	0	0	0	20548	1.45374	0	0	0	1.13121	0.620739	scald
1	21-7-F2	21	pre-treatment	2016-04-04	21	7	7F2	expt sheep	F2	Front right	front foot	right	foot	18994.7	24385.3	0	0	31.3043	1	1	1	0	0	1	1	3	1	scald	ID		1		0			0		1	0	0	0	20548	4.27866	4.38715	0	0	1.50926	1.01848	codd
1	17-7-F1	17	pre-treatment	2016-03-21	17	7	7F1	expt sheep	F1	Front left	front foot	left	foot	0	0	0	0	0	0	0	0	0	0	0	0	3	0	0	no disease		1	0				0		0	0	0	0	20534	0	0	0	0	0		codd
1	1-9-F2	1	pre-treatment	2016-01-26	1	9	9F2	expt sheep	F2	Front right	front foot	right	foot	17.1495	0	0	0	3.43091	0	0	0	0	0	0	0	3	0	0	no disease		1		0			0		0	0	0	0	20479	1.25886	0	0	0	0.646493	0.0582876	codd
1	41-29-F4	41	pre-treatment	2016-06-06	41	29	29F4	expt sheep	F4	Back right	back foot	right	foot	63.2364	0	0	24.6159	13.6216	1	1	0	0	0	1	1	3	0	scald	ID		0			0		0		1	0	0	0	20611	1.80778	0	0	1.40851	1.16499	1.10537	scald
1	33-28-F4	33	pre-treatment	2016-05-16	33	28	28F4	expt sheep	F4	Back right	back foot	right	foot	12.8657	0	0	0	0	0	0	0	0	0	0	0	3	0	0	no disease		1			0		0		0	0	0	0	20590	1.14194	0	0	0	0		scald
1	15-8-F4	15	pre-treatment	2016-03-14	15	8	8F4	expt sheep	F4	Back right	back foot	right	foot	0	0	0	0	0	0	0	0	0	0	0	0	3	0	0	no disease		0			0		0		0	0	0	0	20527	0	0	0	0	0		scald
1	21-7-F1	21	pre-treatment	2016-04-04	21	7	7F1	expt sheep	F1	Front left	front foot	left	foot	10.6531	137.06	0	0	7.07058	1	0	1	0	0	0	0	3	1	0	no disease		1	0				0		0	0	0	0	20548	1.06644	2.14007	0	0	0.906905	0.372334	codd
1	47-23-F2	47	post-treatment	2016-06-27	47	23	23F2	expt sheep	F2	Front right	front foot	right	foot	16.9318	0	0	0	0	0	0	0	0	0	0	0	2	1	0	no disease		1		0			0		0	0	0	0	20632	1.25362	0	0	0	0		no disease
1	38-7-F4	38	pre-treatment	2016-05-31	38	7	7F4	expt sheep	F4	Back right	back foot	right	foot	14809.6	7986.97	0	0	16.4993	1	1	1	0	0	1	1	2	3	scald	ID		1			0		0		1	0	0	0	20605	4.17057	3.90244	0	0	1.24302	0.740344	scald
1	38-10-F3	38	pre-treatment	2016-05-31	38	10	10F3	expt sheep	F3	Back left	back foot	left	foot	30.5402	0	0	10.5332	3.21157	1	0	0	0	0	0	0	2	3	0	no disease		1				0	0		0	0	0	0	20605	1.49887	0	0	1.06195	0.624444	0.661016	no disease
1	25-3-F3	25	pre-treatment	2016-04-18	25	3	3F3	expt sheep	F3	Back left	back foot	left	foot	0	10305.3	19.8095	0	0	1	0	1	0	0	0	0	3	1	0	no disease		1				0	0		0	0	0	0	20562	0	4.0131	1.31826	0	0	0.819752	no disease
1	33-4-F3	33	pre-treatment	2016-05-16	33	4	4F3	expt sheep	F3	Back left	back foot	left	foot	24.2464	0	213.447	0	22.5635	1	0	0	1	0	1	1	3	3	0	no disease		1				0	0		0	0	0	0	20590	1.4022	0	2.33132	0	1.37224	1.89581	no disease
1	21-21-F2	21	pre-treatment	2016-04-04	21	21	21F2	expt sheep	F2	Front right	front foot	right	foot	0	101.669	0	0	0	1	0	1	0	0	0	0	4	0	0	no disease		1		0			0		0	0	0	0	20548	0	2.01144	0	0	0		no disease
0	35-5-F2	35	pre-treatment	2016-05-23	35	5	5F2	expt sheep	F2	Front right	front foot	right	foot	215799	0	0	84750.9	0	1	1	0	0	1	0	1	2	3	fr&CODD	CODD	CODD & footrot	0		2			2	codd1-4	0	0	1	0	20597	5.33405	0	0	4.92815	0	4.45102	codd
0	1-16-F4	1	pre-treatment	2016-01-26	1	16	16F4	expt sheep	F4	Back right	back foot	right	foot	32.6065	0	0	0	15.1757	1	0	0	0	0	1	1	3	0	0	no disease		1			0		0		0	0	0	0	20479	1.52642	0	0	0	1.20886	0.704027	no disease
1	47-28-F2	47	post-treatment	2016-06-27	47	28	28F2	expt sheep	F2	Front right	front foot	right	foot	0	0	0	0	0	0	0	0	0	0	0	0	3	0	0	no disease		1		0			0		0	0	0	0	20632	0	0	0	0	0		footrot
1	25-24-F1	25	pre-treatment	2016-04-18	25	24	24F1	expt sheep	F1	Front left	front foot	left	foot	0	0	0	0	0	0	0	0	0	0	0	0	4	0	0	no disease		1	0				0		0	0	0	0	20562	0	0	0	0	0		no disease
1	7-14-F2	7	pre-treatment	2016-02-15	7	14	14F2	expt sheep	F2	Front right	front foot	right	foot	0	0	0	0	0	0	0	0	0	0	0	0	3	0	scald	ID		0		0			0		1	0	0	0	20499	0	0	0	0	0		scald
1	47-30-F2	47	post-treatment	2016-06-27	47	30	30F2	expt sheep	F2	Front right	front foot	right	foot	0	0	0	0	0	0	0	0	0	0	0	0	3	1	0	no disease		1		0			0		0	0	0	0	20632	0	0	0	0	0		scald
1	19-13-F3	19	pre-treatment	2016-03-28	19	13	13F3	expt sheep	F3	Back left	back foot	left	foot	13.2859	0	27.0458	5.36191	0	1	0	0	0	0	0	0	3	0	0	no disease		0				0	0		0	0	0	0	20541	1.15491	0	1.44787	0.803588	0	1.03353	no disease
0	33-30-F1	33	pre-treatment	2016-05-16	33	30	30F1	expt sheep	F1	Front left	front foot	left	foot	0	0	0	0	0	0	0	0	0	0	0	0	3	0	0	no disease		1	0				0		0	0	0	0	20590	0	0	0	0	0		footrot
1	33-26-F1	33	pre-treatment	2016-05-16	33	26	26F1	expt sheep	F1	Front left	front foot	left	foot	0	0	0	0	0	0	0	0	0	0	0	0	3	0	0	no disease		1	0				0		0	0	0	0	20590	0	0	0	0	0		codd
0	3-33-F3	3	pre-treatment	2016-02-02	3	33	33F3	source sheep	F3	Back left	back foot	left	foot	0	0	288178	13215	24377.7	1	0	0	1	1	1	1	2	3	CODD	CODD	CODD only	1				3	3	codd1-4	0	0	1	0	20486	0	0	5.45966	4.1211	4.38701	5.03579
0	1-23-F1	1	pre-treatment	2016-01-26	1	23	23F1	expt sheep	F1	Front left	front foot	left	foot	0	0	0	0	0	0	0	0	0	0	0	0	2	0	0	no disease		1	0				0		0	0	0	0	20479	0	0	0	0	0		no disease
1	27-22-F1	27	pre-treatment	2016-04-25	27	22	22F1	expt sheep	F1	Front left	front foot	left	foot	0	0	0	0	0	0	0	0	0	0	0	0	4	0	0	no disease		0	0				0		0	0	0	0	20569	0	0	0	0	0		scald
1	51-25-F1	51	post-treatment	2016-07-11	51	25	25F1	expt sheep	F1	Front left	front foot	left	foot	0	0	0	0	0	0	0	0	0	0	0	0	3	0	0	no disease		0	0				0		0	0	0	0	20646	0	0	0	0	0		no disease
1	43-6-F3	43	post-treatment	2016-06-13	43	6	6F3	expt sheep	F3	Back left	back foot	left	foot	0	0	0	0	0	0	0	0	0	0	0	0	2	3	0	no disease		1				0	0		0	0	0	0	20618	0	0	0	0	0		no disease
0	31-25-F4	31	pre-treatment	2016-05-09	31	25	25F4	expt sheep	F4	Back right	back foot	right	foot	0	0	0	0	5.65364	0	0	0	0	0	0	0	2	0	0	no disease		0			0		0		0	0	0	0	20583	0	0	0	0	0.823059	0.275207	no disease
1	47-20-F4	47	post-treatment	2016-06-27	47	20	20F4	expt sheep	F4	Back right	back foot	right	foot	20.8162	0	0	0	0	1	0	0	0	0	0	0	2	0	0	no disease		1			0		0		0	0	0	0	20632	1.33878	0	0	0	0		no disease
1	25-28-F3	25	pre-treatment	2016-04-18	25	28	28F3	expt sheep	F3	Back left	back foot	left	foot	0	0	0	5.08829	0	0	0	0	0	0	0	0	3	0	0	no disease		1				0	0		0	0	0	0	20562	0	0	0	0.784495	0	0.229451	no disease
1	27-27-F3	27	pre-treatment	2016-04-25	27	27	27F3	expt sheep	F3	Back left	back foot	left	foot	0	0	0	0	10.0274	0	0	0	0	0	0	0	3	0	0	no disease		0				0	0		0	0	0	0	20569	0	0	0	0	1.04247	0.524068	no disease
1	47-26-F3	47	post-treatment	2016-06-27	47	26	26F3	expt sheep	F3	Back left	back foot	left	foot	0	0	0	0	10.9797	0	0	0	0	0	1	1	3	0	0	no disease		1				0	0		0	0	0	0	20632	0	0	0	0	1.07845	0.563469	no disease
1	17-9-F4	17	pre-treatment	2016-03-21		9	9F4	expt sheep	F4	Back right	back foot	right	foot	0	0	0	0	0	0	0	0	0	0	0	0			0	no disease					0		0		0	0	0	0		0	0	0	0	0		no disease
1	43-26-F1	43	post-treatment	2016-06-13	43	26	26F1	expt sheep	F1	Front left	front foot	left	foot	3437.83	2906.86	787.376	130.32	259.918	1	1	1	1	1	1	1	3	0	scald	ID		1	0				0		1	0	0	0	20618	3.53641	3.46357	2.89673	2.11833	2.4165	2.59388	codd
1	19-24-F3	19	pre-treatment	2016-03-28	19	24	24F3	expt sheep	F3	Back left	back foot	left	foot	7.60653	0	0	0	4.69666	0	0	0	0	0	0	0	4	0	0	no disease		0				0	0		0	0	0	0	20541	0.934828	0	0	0	0.75562	0.194668	no disease
1	13-8-F4	13	pre-treatment	2016-03-07	13	8	8F4	expt sheep	F4	Back right	back foot	right	foot	0	0	0	0	6.20548	0	0	0	0	0	0	0	3	0	0	no disease		1			0		0		0	0	0	0	20520	0	0	0	0	0.857663	0.315654	scald
1	51-30-F4	51	post-treatment	2016-07-11	51	30	30F4	expt sheep	F4	Back right	back foot	right	foot	22.6126	0	0	1.74305	11.9458	1	0	0	0	0	1	1	3	3	0	no disease		0			0		0		0	0	0	0	20646	1.37314	0	0	0.438234	1.11213	0.659246	scald
1	19-14-F4	19	pre-treatment	2016-03-28	19	14	14F4	expt sheep	F4	Back right	back foot	right	foot	0	0	0	0	5.28706	0	0	0	0	0	0	0	3	0	0	no disease		0			0		0		0	0	0	0	20541	0	0	0	0	0.798447	0.246093	codd
1	41-25-F3	41	pre-treatment	2016-06-06	41	25	25F3	expt sheep	F3	Back left	back foot	left	foot	0	0	0	0	8.30994	0	0	0	0	0	0	0	3	0	0	no disease		0				0	0		0	0	0	0	20611	0	0	0	0	0.968947	0.442477	no disease
1	13-13-F1	13	pre-treatment	2016-03-07	13	13	13F1	expt sheep	F1	Front left	front foot	left	foot	0	0	0	0	0	0	0	0	0	0	0	0	3	0	0	no disease		1	0				0		0	0	0	0	20520	0	0	0	0	0		no disease
1	19-11-F3	19	pre-treatment	2016-03-28	19	11	11F3	expt sheep	F3	Back left	back foot	left	foot	0	0	0	0	0	0	0	0	0	0	0	0	3	0	0	no disease		0				0	0		0	0	0	0	20541	0	0	0	0	0		scald
1	47-14-F4	47	post-treatment	2016-06-27	47	14	14F4	expt sheep	F4	Back right	back foot	right	foot	0	0	0	0	0	0	0	0	0	0	0	0	2	1	footrot	FR		1			0		0		0	1	0	0	20632	0	0	0	0	0		codd
1	23-22-F3	23	pre-treatment	2016-04-11	23	22	22F3	expt sheep	F3	Back left	back foot	left	foot	0	0	0	0	0	0	0	0	0	0	0	0	4	0	0	no disease		0				0	0		0	0	0	0	20555	0	0	0	0	0		scald
1	35-11-F1	35	pre-treatment	2016-05-23	35	11	11F1	expt sheep	F1	Front left	front foot	left	foot	75.2629	0	15.5514	2.05188	0	1	1	0	0	0	0	0	2	0	0	no disease		0	0				0		0	0	0	0	20597	1.88231	0	1.21883	0.484568	0	0.768472	scald
1	47-6-F3	47	post-treatment	2016-06-27	47	6	6F3	expt sheep	F3	Back left	back foot	left	foot	26.6358	80.6814	0	0	0	1	0	1	0	0	0	0	2	3	0	no disease		1				0	0		0	0	0	0	20632	1.44147	1.91212	0	0	0		no disease
1	38-27-F3	38	pre-treatment	2016-05-31	38	27	27F3	expt sheep	F3	Back left	back foot	left	foot	0	0	18.7325	0	10.245	0	0	0	0	0	0	0	3	0	0	no disease		1				0	0		0	0	0	0	20605	0	0	1.29518	0	1.05096	0.98494	no disease
1	27-27-F1	27	pre-treatment	2016-04-25	27	27	27F1	expt sheep	F1	Front left	front foot	left	foot	0	0	0	0	0	0	0	0	0	0	0	0	3	0	0	no disease		0	0				0		0	0	0	0	20569	0	0	0	0	0		no disease
1	35-27-F4	35	pre-treatment	2016-05-23	35	27	27F4	expt sheep	F4	Back right	back foot	right	foot	0	0	0	12.8951	0	0	0	0	0	0	0	0	3	0	0	no disease		0			0		0		0	0	0	0	20597	0	0	0	1.14286	0	0.633305	scald
1	38-14-F4	38	pre-treatment	2016-05-31	38	14	14F4	expt sheep	F4	Back right	back foot	right	foot	1900.72	1896.24	1786.61	69.1749	133.371	1	1	1	1	1	1	1	2	3	scald	ID		1			0		0		1	0	0	0	20605	3.27915	3.27812	3.25227	1.84618	2.12831	2.82155	codd
0	1-23-F2	1	pre-treatment	2016-01-26	1	23	23F2	expt sheep	F2	Front right	front foot	right	foot	0	0	0	0	0	0	0	0	0	0	0	0	2	0	0	no disease		1		0			0		0	0	0	0	20479	0	0	0	0	0		no disease
0	1-2-F1	1	pre-treatment	2016-01-26	1	2	2F1	expt sheep	F1	Front left	front foot	left	foot	0	0	0	0	0	0	0	0	0	0	0	0	3	0	0	no disease		1	0				0		0	0	0	0	20479	0	0	0	0	0		footrot
1	21-25-F1	21	pre-treatment	2016-04-04	21	25	25F1	expt sheep	F1	Front left	front foot	left	foot	22.7997	0	0	0	9.06959	1	0	0	0	0	0	0	4	0	0	no disease		1	0				0		0	0	0	0	20548	1.37657	0	0	0	1.00301	0.480466	no disease
1	38-12-F3	38	pre-treatment	2016-05-31	38	12	12F3	expt sheep	F3	Back left	back foot	left	foot	142.144	36849.1	4744.98	3387.45	4712.52	1	1	1	1	1	1	1	2	3	CODD	CODD	CODD only	1				4	4	codd1-4	0	0	1	0	20605	2.15577	4.56644	3.67633	3.53	3.67335	3.63161	codd
1	25-22-F2	25	pre-treatment	2016-04-18	25	22	22F2	expt sheep	F2	Front right	front foot	right	foot	0	0	0	0	0	0	0	0	0	0	0	0	4	0	0	no disease		1		0			0		0	0	0	0	20562	0	0	0	0	0		no disease
1	11-11-F3	11	pre-treatment	2016-02-29	11	11	11F3	expt sheep	F3	Back left	back foot	left	foot	0	0	0	0	0	0	0	0	0	0	0	0	3	0	0	no disease		0				0	0		0	0	0	0	20513	0	0	0	0	0		scald
1	51-9-F1	51	post-treatment	2016-07-11	51	9	9F1	expt sheep	F1	Front left	front foot	left	foot	44.2504	0	0	0	0	1	1	0	0	0	0	0	3	0	CODD	CODD	CODD only	0	5				5	codd5	0	0	1	0	20646	1.65562	0	0	0	0		codd
1	17-15-F3	17	pre-treatment	2016-03-21	17	15	15F3	expt sheep	F3	Back left	back foot	left	foot	0	0	0	0	0	0	0	0	0	0	0	0	3	2	0	no disease		1				0	0		0	0	0	0	20534	0	0	0	0	0		codd
1	21-10-F3	21	pre-treatment	2016-04-04	21	10	10F3	expt sheep	F3	Back left	back foot	left	foot	36.9802	55.3134	179.717	3.78925	80.781	1	0	0	1	0	1	1	3	0	0	no disease		1				0	0		0	0	0	0	20548	1.57956	1.75061	2.257	0.680268	1.91265	1.94496	no disease
1	38-21-F1	38	pre-treatment	2016-05-31	38	21	21F1	expt sheep	F1	Front left	front foot	left	foot	0	0	0	3.39114	0	0	0	0	0	0	0	0	3	0	0	no disease		1	0				0		0	0	0	0	20605	0	0	0	0.642577	0	0.0532243	no disease
1	15-7-F1	15	pre-treatment	2016-03-14	15	7	7F1	expt sheep	F1	Front left	front foot	left	foot	0	0	0	0	0	0	0	0	0	0	0	0	4	0	0	no disease		0	0				0		0	0	0	0	20527	0	0	0	0	0		codd
1	9-30-F4	9	pre-treatment	2016-02-22		30	30F4	expt sheep	F4	Back right	back foot	right	foot	0	0	0	0	0	0	0	0	0	0	0	0			0	no disease					0		0		0	0	0	0		0	0	0	0	0		scald
1	43-8-F3	43	post-treatment	2016-06-13	43	8	8F3	expt sheep	F3	Back left	back foot	left	foot	2983.69	4898.64	2540.5	5276.88	5087	1	1	1	1	1	1	1	2	2	CODD	CODD	CODD only	1				4	4	codd1-4	0	0	1	0	20618	3.4749	3.69016	3.40509	3.72246	3.70655	3.63362	codd
1	47-12-F1	47	post-treatment	2016-06-27	47	12	12F1	expt sheep	F1	Front left	front foot	left	foot	0	0	0	0	0	0	0	0	0	0	0	0	2	1	0	no disease		1	0				0		0	0	0	0	20632	0	0	0	0	0		no disease
1	27-14-F1	27	pre-treatment	2016-04-25	27	14	14F1	expt sheep	F1	Front left	front foot	left	foot	47.6753	171.976	0	0	0	1	1	1	0	0	0	0	3	1	0	no disease		0	0				0		0	0	0	0	20569	1.68731	2.23799	0	0	0		scald
1	11-8-F1	11	pre-treatment	2016-02-29	11	8	8F1	expt sheep	F1	Front left	front foot	left	foot	0	0	0	0	0	0	0	0	0	0	0	0	3	0	0	no disease		0	0				0		0	0	0	0	20513	0	0	0	0	0		no disease
1	41-27-F4	41	pre-treatment	2016-06-06	41	27	27F4	expt sheep	F4	Back right	back foot	right	foot	0	0	0	15.5001	0	0	0	0	0	0	0	0	3	0	0	no disease		0			0		0		0	0	0	0	20611	0	0	0	1.21749	0	0.713213	scald
1	31-24-F3	31	pre-treatment	2016-05-09	31	24	24F3	expt sheep	F3	Back left	back foot	left	foot	0	0	0	0	0	0	0	0	0	0	0	0	3	0	0	no disease		0				0	0		0	0	0	0	20583	0	0	0	0	0		no disease
1	27-12-F3	27	pre-treatment	2016-04-25	27	12	12F3	expt sheep	F3	Back left	back foot	left	foot	461415	13085.6	395093	24678	63199.9	1	1	1	1	1	1	1	3	3	footrot	FR		0				0	0		0	1	0	0	20569	5.66409	4.11683	5.5967	4.39233	4.80072	5.2068	codd
1	51-22-F3	51	post-treatment	2016-07-11	51	22	22F3	expt sheep	F3	Back left	back foot	left	foot	0	0	0	0	0	0	0	0	0	0	0	0	3	0	0	no disease		0				0	0		0	0	0	0	20646	0	0	0	0	0		scald
1	17-6-F3	17	pre-treatment	2016-03-21	17	6	6F3	expt sheep	F3	Back left	back foot	left	foot	0	0	0	0	0	0	0	0	0	0	0	0	3	0	0	no disease		1				0	0		0	0	0	0	20534	0	0	0	0	0		no disease
1	27-1-F1	27	pre-treatment	2016-04-25	27	1	1F1	expt sheep	F1	Front left	front foot	left	foot	0	0	36.1168	12.8447	0	1	0	0	1	0	0	1	3	0	0	no disease		0	0				0		0	0	0	0	20569	0	0	1.56957	1.14128	0	1.21273	no disease
1	47-22-F4	47	post-treatment	2016-06-27	47	22	22F4	expt sheep	F4	Back right	back foot	right	foot	0	0	0	0	0	0	0	0	0	0	0	0	3	0	0	no disease		1			0		0		0	0	0	0	20632	0	0	0	0	0		no disease
1	3-36-F2	3	pre-treatment	2016-02-02	3	36	36F2	source sheep	F2	Front right	front foot	right	foot	7949.73	1777.35	125175	16845.7	20724.4	1	1	1	1	1	1	1	3	3	CODD	CODD	CODD only	1		1			1	codd1-4	0	0	1	0	20486	3.90041	3.25002	5.09752	4.22652	4.3165	4.73439
1	11-3-F1	11	pre-treatment	2016-02-29	11	3	3F1	expt sheep	F1	Front left	front foot	left	foot	0	0	0	10.9861	0	0	0	0	0	0	0	0	4	0	0	no disease		0	0				0		0	0	0	0	20513	0	0	0	1.07868	0	0.563721	codd
1	41-16-F4	41	pre-treatment	2016-06-06	41	16	16F4	expt sheep	F4	Back right	back foot	right	foot	272.653	0	0	0	0	1	1	0	0	0	0	0	3	0	0	no disease		0			0		0		0	0	0	0	20611	2.4372	0	0	0	0		no disease
1	11-12-F1	11	pre-treatment	2016-02-29	11	12	12F1	expt sheep	F1	Front left	front foot	left	foot	0	0	0	0	0	0	0	0	0	0	0	0	3	0	0	no disease		0	0				0		0	0	0	0	20513	0	0	0	0	0		no disease
1	19-10-F3	19	pre-treatment	2016-03-28	19	10	10F3	expt sheep	F3	Back left	back foot	left	foot	0	0	0	0	5.55825	0	0	0	0	0	0	0	3	0	0	no disease		0				0	0		0	0	0	0	20541	0	0	0	0	0.816788	0.267817	no disease
1	7-14-F4	7	pre-treatment	2016-02-15		14	14F4	expt sheep	F4	Back right	back foot	right	foot	11.5123	0	0	0	0	0	0	0	0	0	0	0			0	no disease					0		0		0	0	0	0		1.09734	0	0	0	0		codd
1	25-27-F3	25	pre-treatment	2016-04-18	25	27	27F3	expt sheep	F3	Back left	back foot	left	foot	0	0	0	0	7.10264	0	0	0	0	0	0	0	3	0	0	no disease		1				0	0		0	0	0	0	20562	0	0	0	0	0.908626	0.374298	no disease
1	13-27-F1	13	pre-treatment	2016-03-07	13	27	27F1	expt sheep	F1	Front left	front foot	left	foot	0	0	0	2.6143	0	0	0	0	0	0	0	0	3	0	0	no disease		1	0				0		0	0	0	0	20520	0	0	0	0.558025	0	-0.0597652	no disease
1	13-26-F4	13	pre-treatment	2016-03-07	13	26	26F4	expt sheep	F4	Back right	back foot	right	foot	22.3173	0	42.6367	0	0	1	0	0	1	0	0	1	3	0	0	no disease		1			0		0		0	0	0	0	20520	1.36768	0	1.63985	0	0	1.15266	no disease
1	47-24-F4	47	post-treatment	2016-06-27	47	24	24F4	expt sheep	F4	Back right	back foot	right	foot	0	0	0	0	0	0	0	0	0	0	0	0	3	0	0	no disease		1			0		0		0	0	0	0	20632	0	0	0	0	0		no disease
1	35-7-F3	35	pre-treatment	2016-05-23	35	7	7F3	expt sheep	F3	Back left	back foot	left	foot	0	0	30.6128	0.945881	6.33195	1	0	0	0	0	0	0	2	3	0	no disease		0				0	0		0	0	0	0	20597	0	0	1.49986	0.289116	0.86522	1.10141	scald
1	25-27-F2	25	pre-treatment	2016-04-18	25	27	27F2	expt sheep	F2	Front right	front foot	right	foot	0	0	0	0	0	0	0	0	0	0	0	0	3	0	0	no disease		1		0			0		0	0	0	0	20562	0	0	0	0	0		no disease
1	29-14-F3	29	pre-treatment	2016-05-03	29	14	14F3	expt sheep	F3	Back left	back foot	left	foot	94690.6	1094.36	523310	3246.03	10186.6	1	1	1	1	1	1	1	2	3	footrot	FR		1				0	0		0	1	0	0	20577	4.97631	3.03956	5.71876	3.51149	4.00807	5.25265	codd
0	1-13-F4	1	pre-treatment	2016-01-26	1	13	13F4	expt sheep	F4	Back right	back foot	right	foot	0	0	0	0	5.57034	0	0	0	0	0	0	0	2	0	0	no disease		1			0		0		0	0	0	0	20479	0	0	0	0	0.817588	0.268761	no disease
1	5-15-F3	5	pre-treatment	2016-02-08	5	15	15F3	expt sheep	F3	Back left	back foot	left	foot	0	0	0	0	0	0	0	0	0	0	0	0	3	0	0	no disease		1				0	0		0	0	0	0	20492	0	0	0	0	0		codd
1	9-13-F3	9	pre-treatment	2016-02-22	9	13	13F3	expt sheep	F3	Back left	back foot	left	foot	10.568	0	0	0	5.96825	0	0	0	0	0	0	0	3	0	0	no disease		1					0		0	0	0	0	20506	1.06326	0	0	0	0.843124	0.298726	no disease
1	31-23-F4	31	pre-treatment	2016-05-09	31	23	23F4	expt sheep	F4	Back right	back foot	right	foot	7769.58	0	364402	12155.8	12642	1	1	0	1	1	1	1	2	3	fr&CODD	CODD	CODD & footrot	0			1		1	codd1-4	0	0	1	0	20583	3.89045	0	5.56158	4.08482	4.10185	5.11305	codd
1	33-9-F1	33	pre-treatment	2016-05-16	33	9	9F1	expt sheep	F1	Front left	front foot	left	foot	88738.6	0	228052	5.31396	83.3271	1	1	0	1	0	1	1	3	2	fr&CODD	CODD	CODD & footrot	1	2				2	codd1-4	0	0	1	0	20590	4.94812	0	5.35804	0.800302	1.92597	4.88108	codd
1	5-7-F2	5	pre-treatment	2016-02-08	5	7	7F2	expt sheep	F2	Front right	front foot	right	foot	0	0	0	0	0	0	0	0	0	0	0	0	3	0	0	no disease		1		0			0		0	0	0	0	20492	0	0	0	0	0		codd
1	33-30-F4	33	pre-treatment	2016-05-16	33	30	30F4	expt sheep	F4	Back right	back foot	right	foot	15.2205	0	91.5058	6.92326	0	1	0	0	1	0	0	1	3	0	0	no disease		1			0		0		0	0	0	0	20590	1.21007	0	1.96617	0.898904	0	1.516	scald
1	5-26-F4	5	pre-treatment	2016-02-08	5	26	26F4	expt sheep	F4	Back right	back foot	right	foot	53.0513	0	0	0	11.1406	1	1	0	0	0	1	1	3	0	0	no disease		1			0		0		0	0	0	0	20492	1.73281	0	0	0	1.08424	0.569786	no disease
1	17-21-F1	17	pre-treatment	2016-03-21	17	21	21F1	expt sheep	F1	Front left	front foot	left	foot	0	0	0	0	0	0	0	0	0	0	0	0	3	0	0	no disease		1	0				0		0	0	0	0	20534	0	0	0	0	0		no disease
1	33-12-F4	33	pre-treatment	2016-05-16	33	12	12F4	expt sheep	F4	Back right	back foot	right	foot	0	0	0	0	0	0	0	0	0	0	0	0	2	3	0	no disease		1			0		0		0	0	0	0	20590	0	0	0	0	0		no disease
1	33-12-F1	33	pre-treatment	2016-05-16	33	12	12F1	expt sheep	F1	Front left	front foot	left	foot	0	0	0	0	0	0	0	0	0	0	0	0	2	3	0	no disease		1	0				0		0	0	0	0	20590	0	0	0	0	0		no disease
1	38-22-F1	38	pre-treatment	2016-05-31	38	22	22F1	expt sheep	F1	Front left	front foot	left	foot	0	0	0	0	8.80369	0	0	0	0	0	0	0	3	0	0	no disease		1	0				0		0	0	0	0	20605	0	0	0	0	0.991389	0.467543	scald
1	5-10-F4	5	pre-treatment	2016-02-08	5	10	10F4	expt sheep	F4	Back right	back foot	right	foot	0	0	17.0513	0	0	0	0	0	0	0	0	0	3	0	0	no disease		1			0		0		0	0	0	0	20492	0	0	1.25651	0	0	0.754636	codd
1	7-27-F2	7	pre-treatment	2016-02-15	7	27	27F2	expt sheep	F2	Front right	front foot	right	foot	10.1724	0	0	0	0	0	0	0	0	0	0	0	4	0	0	no disease		0		0			0		0	0	0	0	20499	1.04815	0	0	0	0		no disease
1	31-23-F2	31	pre-treatment	2016-05-09	31	23	23F2	expt sheep	F2	Front right	front foot	right	foot	11.2598	0	0	0	0	0	0	0	0	0	0	0	2	3	0	no disease		0		0			0		0	0	0	0	20583	1.08849	0	0	0	0		no disease
1	19-3-F1	19	pre-treatment	2016-03-28	19	3	3F1	expt sheep	F1	Front left	front foot	left	foot	0	0	0	0	0	0	0	0	0	0	0	0	4	0	0	no disease		0	0				0		0	0	0	0	20541	0	0	0	0	0		codd
1	51-13-F2	51	post-treatment	2016-07-11	51	13	13F2	expt sheep	F2	Front right	front foot	right	foot	21.8701	0	0	0	0	1	0	0	0	0	0	0	2	0	0	no disease		0		0			0		0	0	0	0	20646	1.35927	0	0	0	0		no disease
0	29-7-F4	29	pre-treatment	2016-05-03	29	7	7F4	expt sheep	F4	Back right	back foot	right	foot	51.7032	0	44.231	0	6.90186	1	1	0	1	0	0	1	3	3	0	no disease		1			0		0		0	0	0	0	20577	1.72184	0	1.65544	0	0.897729	1.23158	scald
0	1-12-F4	1	pre-treatment	2016-01-26	1	12	12F4	expt sheep	F4	Back right	back foot	right	foot	0	0	0	0	14.6283	0	0	0	0	0	1	1	2	0	0	no disease		1			0		0		0	0	0	0	20479	0	0	0	0	1.19391	0.688074	no disease
1	29-15-F2	29	pre-treatment	2016-05-03	29	15	15F2	expt sheep	F2	Front right	front foot	right	foot	3637.29	84787.6	45252.5	429.844	32549.7	1	1	1	1	1	1	1	2	3	footrot	FR		1		0			0		0	1	0	0	20577	3.5609	4.92834	4.65565	2.63432	4.51256	4.41626	codd
1	43-27-F1	43	post-treatment	2016-06-13	43	27	27F1	expt sheep	F1	Front left	front foot	left	foot	0	0	0	0	0	0	0	0	0	0	0	0	3	0	0	no disease		1	0				0		0	0	0	0	20618	0	0	0	0	0		no disease
1	17-9-F1	17	pre-treatment	2016-03-21	17	9	9F1	expt sheep	F1	Front left	front foot	left	foot	0	0	0	0	0	0	0	0	0	0	0	0	3	0	0	no disease		1	0				0		0	0	0	0	20534	0	0	0	0	0		codd
0	17-29-F4	17	pre-treatment	2016-03-21		29	29F4	expt sheep	F4	Back right	back foot	right	foot	0	0	0	0	0	0	0	0	0	0	0	0			0	no disease					0		0		0	0	0	0		0	0	0	0	0		scald
1	11-28-F2	11	pre-treatment	2016-02-29	11	28	28F2	expt sheep	F2	Front right	front foot	right	foot	60.9444	0	0	0	11.8205	1	1	0	0	0	1	1	3	0	0	no disease		0		0			0		0	0	0	0	20513	1.792	0	0	0	1.10791	0.595516	footrot
1	25-24-F3	25	pre-treatment	2016-04-18	25	24	24F3	expt sheep	F3	Back left	back foot	left	foot	31.549	0	0	0	0	1	0	0	0	0	0	0	4	0	0	no disease		1				0	0		0	0	0	0	20562	1.51254	0	0	0	0		no disease
1	33-14-F1	33	pre-treatment	2016-05-16	33	14	14F1	expt sheep	F1	Front left	front foot	left	foot	0	0	56.63	0	0	1	0	0	1	0	0	1	2	3	0	no disease		1	0				0		0	0	0	0	20590	0	0	1.76065	0	0	1.27593	scald
1	17-18-F1	17	pre-treatment	2016-03-21	17	18	18F1	expt sheep	F1	Front left	front foot	left	foot	0	0	0	0	0	0	0	0	0	0	0	0	3	0	0	no disease		1	0				0		0	0	0	0	20534	0	0	0	0	0		no disease
1	21-6-F1	21	pre-treatment	2016-04-04	21	6	6F1	expt sheep	F1	Front left	front foot	left	foot	0	0	0	0	0	0	0	0	0	0	0	0	3	0	0	no disease		1	0				0		0	0	0	0	20548	0	0	0	0	0		codd
1	35-7-F4	35	pre-treatment	2016-05-23	35	7	7F4	expt sheep	F4	Back right	back foot	right	foot	0	264.919	44.8582	0.593957	15.2322	1	0	1	1	0	1	1	2	3	0	no disease		0			0		0		0	0	0	0	20597	0	2.42475	1.66142	0.202477	1.21038	1.30596	scald
1	51-28-F2	51	post-treatment	2016-07-11	51	28	28F2	expt sheep	F2	Front right	front foot	right	foot	0	0	0	0	0	0	0	0	0	0	0	0	3	0	0	no disease		0		0			0		0	0	0	0	20646	0	0	0	0	0		footrot
1	33-25-F1	33	pre-treatment	2016-05-16	33	25	25F1	expt sheep	F1	Front left	front foot	left	foot	19.8375	0	0	0	0	0	0	0	0	0	0	0	3	0	0	no disease		1	0				0		0	0	0	0	20590	1.31884	0	0	0	0		no disease
1	3-37-F2	3	pre-treatment	2016-02-02	3	37	37F2	source sheep	F2	Front right	front foot	right	foot	20.8835	0	73.8413	2.30991	0	1	0	0	1	0	0	1	2	3	0	no disease		1		0			0		0	0	0	0	20486	1.34012	0	1.87414	0.519817	0	1.40456
1	33-11-F1	33	pre-treatment	2016-05-16	33	11	11F1	expt sheep	F1	Front left	front foot	left	foot	0	248.708	41.1341	0	0	1	0	1	1	0	0	1	2	1	0	no disease		1	0				0		0	0	0	0	20590	0	2.39743	1.62463	0	0	1.13708	scald
1	27-8-F1	27	pre-treatment	2016-04-25	27	8	8F1	expt sheep	F1	Front left	front foot	left	foot	0	4053.07	0	0	0	1	0	1	0	0	0	0	3	3	0	no disease		0	0				0		0	0	0	0	20569	0	3.60789	0	0	0		no disease
1	23-15-F1	23	pre-treatment	2016-04-11	23	15	15F1	expt sheep	F1	Front left	front foot	left	foot	378.785	260161	45.3651	2907.93	27850	1	1	1	1	1	1	1	3	3	fr&CODD	CODD	CODD & footrot	0	1				1	codd1-4	0	0	1	0	20555	2.57954	5.41524	1.66619	3.46373	4.44484	4.01148	codd
0	3-32-F1	3	pre-treatment	2016-02-02	3	32	32F1	source sheep	F1	Front left	front foot	left	foot	0	0	0	0	0	0	0	0	0	0	0	0	2	3	0	no disease		1	0				0		0	0	0	0	20486	0	0	0	0	0
1	21-17-F2	21	pre-treatment	2016-04-04	21	17	17F2	expt sheep	F2	Front right	front foot	right	foot	0	152.933	0	3.10407	0	1	0	1	0	0	0	0	4	0	0	no disease		1		0			0		0	0	0	0	20548	0	2.18733	0	0.613215	0	0.01481	codd
1	5-13-F4	5	pre-treatment	2016-02-08	5	13	13F4	expt sheep	F4	Back right	back foot	right	foot	0	0	0	0	0	0	0	0	0	0	0	0	2	0	0	no disease		1			0		0		0	0	0	0	20492	0	0	0	0	0		no disease
1	27-14-F2	27	pre-treatment	2016-04-25	27	14	14F2	expt sheep	F2	Front right	front foot	right	foot	20.7426	70.2948	70.1183	4.94531	4.47879	1	0	1	1	0	0	1	3	1	0	no disease		0		0			0		0	0	0	0	20569	1.33731	1.85306	1.85198	0.774174	0.738685	1.42348	scald
1	13-24-F4	13	pre-treatment	2016-03-07	13	24	24F4	expt sheep	F4	Back right	back foot	right	foot	0	0	0	0	0	0	0	0	0	0	0	0	3	0	0	no disease		1			0		0		0	0	0	0	20520	0	0	0	0	0		no disease
1	21-11-F4	21	pre-treatment	2016-04-04	21	11	11F4	expt sheep	F4	Back right	back foot	right	foot	0	0	0	0	0	0	0	0	0	0	0	0	3	0	0	no disease		1			0		0		0	0	0	0	20548	0	0	0	0	0		no disease
1	51-23-F4	51	post-treatment	2016-07-11	51	23	23F4	expt sheep	F4	Back right	back foot	right	foot	0	0	0	0	0	0	0	0	0	0	0	0	3	0	CODD	CODD	CODD only	0			5		5	codd5	0	0	1	0	20646	0	0	0	0	0		codd
1	35-14-F4	35	pre-treatment	2016-05-23	35	14	14F4	expt sheep	F4	Back right	back foot	right	foot	6075.38	33556.6	11394.4	929.121	879.214	1	1	1	1	1	1	1	1	3	scald	ID		0			0		0		1	0	0	0	20597	3.78365	4.52579	4.05673	2.96854	2.94459	3.64354	codd
1	5-11-F4	5	pre-treatment	2016-02-08	5	11	11F4	expt sheep	F4	Back right	back foot	right	foot	0	0	0	0	0	0	0	0	0	0	0	0	2	0	0	no disease		1			0		0		0	0	0	0	20492	0	0	0	0	0		no disease
1	35-1-F4	35	pre-treatment	2016-05-23	35	1	1F4	expt sheep	F4	Back right	back foot	right	foot	0	0	47.0749	3.39645	2.31781	1	0	0	1	0	0	1	3	0	0	no disease		0			0		0		0	0	0	0	20597	0	0	1.68192	0.643102	0.520851	1.24542	no disease
1	5-30-F4	5	pre-treatment	2016-02-08	5	30	30F4	expt sheep	F4	Back right	back foot	right	foot	34.9312	0	0	0	0	1	0	0	0	0	0	0	3	0	0	no disease		1			0		0		0	0	0	0	20492	1.55547	0	0	0	0		scald
1	19-3-F2	19	pre-treatment	2016-03-28	19	3	3F2	expt sheep	F2	Front right	front foot	right	foot	0	0	0	0	5.95348	0	0	0	0	0	0	0	4	0	0	no disease		0		0			0		0	0	0	0	20541	0	0	0	0	0.842202	0.297649	codd
1	33-18-F2	33	pre-treatment	2016-05-16	33	18	18F2	expt sheep	F2	Front right	front foot	right	foot	0	0	0	0	0	0	0	0	0	0	0	0	3	0	0	no disease		1		0			0		0	0	0	0	20590	0	0	0	0	0		no disease
1	41-17-F2	41	pre-treatment	2016-06-06	41	17	17F2	expt sheep	F2	Front right	front foot	right	foot	96171.3	3324.46	63100.3	16437.6	4066.82	1	1	1	1	1	1	1	3	1	scald	ID		0		0			0		1	0	0	0	20611	4.98305	3.52185	4.80004	4.21587	3.60936	4.44511	codd
1	13-8-F2	13	pre-treatment	2016-03-07	13	8	8F2	expt sheep	F2	Front right	front foot	right	foot	0	0	0	0	0	0	0	0	0	0	0	0	3	0	0	no disease		1		0			0		0	0	0	0	20520	0	0	0	0	0		no disease
0	3-39-F2	3	pre-treatment	2016-02-03	3	39	39F2	source sheep	F2	Front right	front foot	right	foot	0	0	63.4303	0	0	1	0	0	1	0	0	1	1	3	0	no disease		1		0			0		0	0	0	0	20487	0	0	1.80909	0	0	1.32518
1	38-12-F4	38	pre-treatment	2016-05-31	38	12	12F4	expt sheep	F4	Back right	back foot	right	foot	31.1368	50.536	83.8163	4.52537	23.3496	1	0	0	1	0	1	1	2	3	0	no disease		1			0		0		0	0	0	0	20605	1.507	1.71211	1.92848	0.742362	1.38649	1.5709	no disease
1	51-10-F4	51	post-treatment	2016-07-11	51	10	10F4	expt sheep	F4	Back right	back foot	right	foot	0	0	0	0	14.4176	0	0	0	0	0	1	1	2	0	CODD	CODD	CODD only	0			5		5	codd5	0	0	1	0	20646	0	0	0	0	1.18802	0.681772	codd
1	7-25-F2	7	pre-treatment	2016-02-15	7	25	25F2	expt sheep	F2	Front right	front foot	right	foot	0	0	0	0	0	0	0	0	0	0	0	0	5	0	0	no disease		0		0			0		0	0	0	0	20499	0	0	0	0	0		no disease
1	31-28-F1	31	pre-treatment	2016-05-09	31	28	28F1	expt sheep	F1	Front left	front foot	left	foot	0	0	0	0	0	0	0	0	0	0	0	0	3	0	0	no disease		0	0				0		0	0	0	0	20583	0	0	0	0	0		no disease
1	51-12-F1	51	post-treatment	2016-07-11	51	12	12F1	expt sheep	F1	Front left	front foot	left	foot	0	0	0	0	0	0	0	0	0	0	0	0	3	2	0	no disease		0	0				0		0	0	0	0	20646	0	0	0	0	0		no disease
1	7-10-F2	7	pre-treatment	2016-02-15	7	10	10F2	expt sheep	F2	Front right	front foot	right	foot	14.1876	0	0	3.32032	4.22633	0	0	0	0	0	0	0	3	1	footrot	FR		0		0			0		0	1	0	0	20499	1.18149	0	0	0.635516	0.718197	0.400633	footrot
1	51-8-F1	51	post-treatment	2016-07-11	51	8	8F1	expt sheep	F1	Front left	front foot	left	foot	15.8452	0	0	0	0	0	0	0	0	0	0	0	3	0	0	no disease		0	0				0		0	0	0	0	20646	1.22648	0	0	0	0		no disease
1	35-13-F3	35	pre-treatment	2016-05-23	35	13	13F3	expt sheep	F3	Back left	back foot	left	foot	0	0	0	0	0	0	0	0	0	0	0	0	3	0	0	no disease		0				0	0		0	0	0	0	20597	0	0	0	0	0		no disease
1	1-14-F2	1	pre-treatment	2016-01-26	1	14	14F2	expt sheep	F2	Front right	front foot	right	foot	41.1553	0	0	0	8.19346	1	0	0	0	0	0	0	2	0	0	no disease		1		0			0		0	0	0	0	20479	1.62485	0	0	0	0.963479	0.436346	scald
1	35-15-F4	35	pre-treatment	2016-05-23	35	15	15F4	expt sheep	F4	Back right	back foot	right	foot	0	0	0	0	0	0	0	0	0	0	0	0	2	3	0	no disease		0			0		0		0	0	0	0	20597	0	0	0	0	0		footrot
1	29-11-F4	29	pre-treatment	2016-05-03	29	11	11F4	expt sheep	F4	Back right	back foot	right	foot	0	0	0	0	0	0	0	0	0	0	0	0	2	0	0	no disease		1			0		0		0	0	0	0	20577	0	0	0	0	0		no disease
0	35-6-F1	35	pre-treatment	2016-05-23	35	6	6F1	expt sheep	F1	Front left	front foot	left	foot	111082	42019.6	0	13450.4	0	1	1	1	0	1	0	1	2	3	footrot	FR		0	0				0		0	1	0	0	20597	5.04565	4.62346	0	4.12877	0	3.65161	codd
1	23-14-F3	23	pre-treatment	2016-04-11	23	14	14F3	expt sheep	F3	Back left	back foot	left	foot	0	0	0	0	0	0	0	0	0	0	0	0	3	0	scald	ID		0				0	0		1	0	0	0	20555	0	0	0	0	0		codd
1	47-25-F1	47	post-treatment	2016-06-27	47	25	25F1	expt sheep	F1	Front left	front foot	left	foot	0	0	0	0	0	0	0	0	0	0	0	0	3	0	0	no disease		1	0				0		0	0	0	0	20632	0	0	0	0	0		no disease
0	3-39-F3	3	pre-treatment	2016-02-03	3	39	39F3	source sheep	F3	Back left	back foot	left	foot	0	0	254.502	0	0	1	0	0	1	0	0	1	1	3	0	no disease		1				0	0		0	0	0	0	20487	0	0	2.40739	0	0	1.92857
1	7-25-F3	7	pre-treatment	2016-02-15	7	25	25F3	expt sheep	F3	Back left	back foot	left	foot	11.5972	0	0	0	0	0	0	0	0	0	0	0	5	0	0	no disease		0				0	0		0	0	0	0	20499	1.10027	0	0	0	0		no disease
0	1-9-F4	1	pre-treatment	2016-01-26	1	9	9F4	expt sheep	F4	Back right	back foot	right	foot	0	0	12.3973	0	4.84153	0	0	0	0	0	0	0	3	0	0	no disease		1			0		0		0	0	0	0	20479	0	0	1.12702	0	0.766527	0.759387	no disease
1	51-26-F1	51	post-treatment	2016-07-11	51	26	26F1	expt sheep	F1	Front left	front foot	left	foot	236033	8154.25	0	0	151681	1	1	1	0	0	1	1	3	3	CODD	CODD	CODD only	0	1				1	codd1-4	0	0	1	0	20646	5.37297	3.91144	0	0	5.18093	4.70381	codd
1	9-27-F3	9	pre-treatment	2016-02-22	9	27	27F3	expt sheep	F3	Back left	back foot	left	foot	0	0	0	0	0	0	0	0	0	0	0	0	4	0	0	no disease		1					0		0	0	0	0	20506	0	0	0	0	0		no disease
1	15-11-F4	15	pre-treatment	2016-03-14	15	11	11F4	expt sheep	F4	Back right	back foot	right	foot	0	0	0	0	0	0	0	0	0	0	0	0	2	0	0	no disease		0			0		0		0	0	0	0	20527	0	0	0	0	0		no disease
0	1-29-F4	1	pre-treatment	2016-01-26	1	29	29F4	expt sheep	F4	Back right	back foot	right	foot	0	0	0	0	0	0	0	0	0	0	0	0	3	0	0	no disease		1			0		0		0	0	0	0	20479	0	0	0	0	0		scald
1	41-21-F1	41	pre-treatment	2016-06-06	41	21	21F1	expt sheep	F1	Front left	front foot	left	foot	0	0	0	0	0	0	0	0	0	0	0	0	3	0	0	no disease		0	0				0		0	0	0	0	20611	0	0	0	0	0		no disease
1	21-14-F2	21	pre-treatment	2016-04-04	21	14	14F2	expt sheep	F2	Front right	front foot	right	foot	0	0	0	0	11.0913	0	0	0	0	0	1	1	3	0	overgrown	other		1		0			0		0	0	0	1	20548	0	0	0	0	1.08247	0.567863	scald
1	11-4-F3	11	pre-treatment	2016-02-29	11	4	4F3	expt sheep	F3	Back left	back foot	left	foot	0	0	0	0	0	0	0	0	0	0	0	0	4	0	0	no disease		0				0	0		0	0	0	0	20513	0	0	0	0	0		no disease
1	27-9-F4	27	pre-treatment	2016-04-25	27	9	9F4	expt sheep	F4	Back right	back foot	right	foot	11.7793	0	27.6727	0	16.3802	1	0	0	0	0	1	1	3	3	0	no disease		0			0		0		0	0	0	0	20569	1.10651	0	1.45747	0	1.24005	1.16685	no disease
1	7-4-F4	7	pre-treatment	2016-02-15		4	4F4	expt sheep	F4	Back right	back foot	right	foot	0	0	0	0	0	0	0	0	0	0	0	0			0	no disease					0		0		0	0	0	0		0	0	0	0	0		no disease
0	3-39-F1	3	pre-treatment	2016-02-03	3	39	39F1	source sheep	F1	Front left	front foot	left	foot	0	0	1030507	0	2.55243	1	0	0	1	0	0	1	1	3	CODD	CODD	CODD only	1	2				2	codd1-4	0	0	1	0	20487	0	0	6.01305	0	0.550526	5.53593
0	1-22-F4	1	pre-treatment	2016-01-26	1	22	22F4	expt sheep	F4	Back right	back foot	right	foot	0	0	0	0	9.78904	0	0	0	0	0	0	0	3	0	0	no disease		1			0		0		0	0	0	0	20479	0	0	0	0	1.03298	0.513619	no disease
1	35-13-F1	35	pre-treatment	2016-05-23	35	13	13F1	expt sheep	F1	Front left	front foot	left	foot	0	0	0	2.39521	0	0	0	0	0	0	0	0	3	0	0	no disease		0	0				0		0	0	0	0	20597	0	0	0	0.530866	0	-0.0977784	no disease
1	9-2-F3	9	pre-treatment	2016-02-22	9	2	2F3	expt sheep	F3	Back left	back foot	left	foot	19.9429	0	0	0	0	0	0	0	0	0	0	0	4	0	0	no disease		1					0		0	0	0	0	20506	1.32104	0	0	0	0		footrot
1	7-11-F4	7	pre-treatment	2016-02-15		11	11F4	expt sheep	F4	Back right	back foot	right	foot	11.4471	0	18.6022	13.1149	11.737	0	0	0	0	0	1	1			0	no disease					0		0		0	0	0	0		1.09507	0	1.2923	1.14968	1.10507	1.16091	no disease
1	7-13-F1	7	pre-treatment	2016-02-15	7	13	13F1	expt sheep	F1	Front left	front foot	left	foot	0	0	0	0	0	0	0	0	0	0	0	0	4	0	0	no disease		0	0				0		0	0	0	0	20499	0	0	0	0	0		no disease
1	33-4-F1	33	pre-treatment	2016-05-16	33	4	4F1	expt sheep	F1	Front left	front foot	left	foot	36624	15237.9	79036.1	212.323	3607.58	1	1	1	1	1	1	1	3	3	footrot	FR		1	0				0		0	1	0	0	20590	4.56378	4.18295	4.89783	2.32904	3.55734	4.4412	codd
1	19-27-F1	19	pre-treatment	2016-03-28	19	27	27F1	expt sheep	F1	Front left	front foot	left	foot	0	0	0	0	0	0	0	0	0	0	0	0	4	0	0	no disease		0	0				0		0	0	0	0	20541	0	0	0	0	0		no disease
1	5-6-F1	5	pre-treatment	2016-02-08	5	6	6F1	expt sheep	F1	Front left	front foot	left	foot	13.2903	0	124.877	0	29.1678	1	0	0	1	0	1	1	3	0	0	no disease		1	0				0		0	0	0	0	20492	1.15504	0	2.09995	0	1.47954	1.71053	codd
1	27-15-F3	27	pre-treatment	2016-04-25	27	15	15F3	expt sheep	F3	Back left	back foot	left	foot	15891.5	18142.6	80.7417	4.80298	13.7372	1	1	1	1	0	1	1	3	3	0	no disease		0				0	0		0	0	0	0	20569	4.20119	4.25872	1.91244	0.763651	1.16842	1.51975	codd
1	25-9-F4	25	pre-treatment	2016-04-18	25	9	9F4	expt sheep	F4	Back right	back foot	right	foot	0	0	0	0	0	0	0	0	0	0	0	0	3	2	0	no disease		1			0		0		0	0	0	0	20562	0	0	0	0	0		no disease
0	3-31-F3	3	pre-treatment	2016-02-02	3	31	31F3	source sheep	F3	Back left	back foot	left	foot	0	0	0	0	0	0	0	0	0	0	0	0	2	3	0	no disease		1				0	0		0	0	0	0	20486	0	0	0	0	0
1	43-21-F4	43	post-treatment	2016-06-13	43	21	21F4	expt sheep	F4	Back right	back foot	right	foot	0	0	0	0.993278	0	0	0	0	0	0	0	0	3	0	0	no disease		1			0		0		0	0	0	0	20618	0	0	0	0.299568	0	-0.480051	no disease
0	1-4-F1	1	pre-treatment	2016-01-26	1	4	4F1	expt sheep	F1	Front left	front foot	left	foot	10.8796	0	0	0	6.23941	0	0	0	0	0	0	0	3	1	0	no disease		1	0				0		0	0	0	0	20479	1.0748	0	0	0	0.859703	0.318022	codd
1	38-4-F1	38	pre-treatment	2016-05-31	38	4	4F1	expt sheep	F1	Front left	front foot	left	foot	52270	74642.1	412766	64916.4	21636.7	1	1	1	1	1	1	1	2	3	fr&CODD	CODD	CODD & footrot	1	1				1	codd1-4	0	0	1	0	20605	4.71826	4.87299	5.61571	4.81236	4.33521	5.22126	codd
0	25-9-F1	25	pre-treatment	2016-04-18	25	9	9F1	expt sheep	F1	Front left	front foot	left	foot	78.6826	4164.41	0	0	0	1	1	1	0	0	0	0	3	2	scald	ID		1	0				0		1	0	0	0	20562	1.90136	3.61966	0	0	0		codd
1	27-20-F4	27	pre-treatment	2016-04-25	27	20	20F4	expt sheep	F4	Back right	back foot	right	foot	0	0	25.9635	0	12.3489	1	0	0	0	0	1	1	3	0	0	no disease		0			0		0		0	0	0	0	20569	0	0	1.43078	0	1.12545	1.10622	no disease
1	43-9-F3	43	post-treatment	2016-06-13	43	9	9F3	expt sheep	F3	Back left	back foot	left	foot	0	0	32.0264	11.8305	8.0234	1	0	0	0	0	0	0	2	0	0	no disease		1				0	0		0	0	0	0	20618	0	0	1.51886	1.10824	0.95537	1.23788	no disease
0	3-35-F4	3	pre-treatment	2016-02-02	3	35	35F4	source sheep	F4	Back right	back foot	right	foot	0	196.031	180.666	4.80559	55.344	1	0	1	1	0	1	1	2	3	0	no disease		1			0		0		0	0	0	0	20486	0	2.29454	2.25927	0.763846	1.75085	1.90456
1	43-28-F2	43	post-treatment	2016-06-13	43	28	28F2	expt sheep	F2	Front right	front foot	right	foot	58178	26909.9	539369	130216	62834.9	1	1	1	1	1	1	1	3	3	footrot	FR		1		0			0		0	1	0	0	20618	4.76477	4.42993	5.73189	5.11467	4.79821	5.38764	footrot
0	35-23-F3	35	pre-treatment	2016-05-23	35	23	23F3	expt sheep	F3	Back left	back foot	left	foot	0	0	81.7203	0	6.9702	1	0	0	1	0	0	1	2	3	0	no disease		0				0	0		0	0	0	0	20597	0	0	1.91761	0	0.901469	1.47076	codd
1	11-25-F2	11	pre-treatment	2016-02-29	11	25	25F2	expt sheep	F2	Front right	front foot	right	foot	0	0	0	0	0	0	0	0	0	0	0	0	3	0	0	no disease		0		0			0		0	0	0	0	20513	0	0	0	0	0		no disease
1	29-19-F4	29	pre-treatment	2016-05-03	29	19	19F4	expt sheep	F4	Back right	back foot	right	foot	38.6945	0	139.755	4.50781	5.35381	1	0	0	1	0	0	1	2	0	0	no disease		1			0		0		0	0	0	0	20577	1.59873	0	2.14846	0.740979	0.803034	1.69786	no disease
1	13-5-F3	13	pre-treatment	2016-03-07	13	5	5F3	expt sheep	F3	Back left	back foot	left	foot	34.3086	0	0	2.00619	12.7334	1	0	0	0	0	1	1	3	0	0	no disease		1				0	0		0	0	0	0	20520	1.54788	0	0	0.478016	1.13778	0.691364	codd
1	5-20-F1	5	pre-treatment	2016-02-08	5	20	20F1	expt sheep	F1	Front left	front foot	left	foot	0	0	0	0	0	0	0	0	0	0	0	0	3	0	0	no disease		1	0				0		0	0	0	0	20492	0	0	0	0	0		no disease
1	17-6-F1	17	pre-treatment	2016-03-21	17	6	6F1	expt sheep	F1	Front left	front foot	left	foot	0	0	0	0	0	0	0	0	0	0	0	0	3	0	0	no disease		1	0				0		0	0	0	0	20534	0	0	0	0	0		codd
0	1-27-F4	1	pre-treatment	2016-01-26	1	27	27F4	expt sheep	F4	Back right	back foot	right	foot	0	0	0	0	0	0	0	0	0	0	0	0	3	0	0	no disease		1			0		0		0	0	0	0	20479	0	0	0	0	0		scald
1	7-11-F2	7	pre-treatment	2016-02-15	7	11	11F2	expt sheep	F2	Front right	front foot	right	foot	0	0	0	0	0	0	0	0	0	0	0	0	4	0	0	no disease		0		0			0		0	0	0	0	20499	0	0	0	0	0		scald
1	35-9-F1	35	pre-treatment	2016-05-23	35	9	9F1	expt sheep	F1	Front left	front foot	left	foot	274.639	0	782.392	202.309	78.9026	1	1	0	1	1	1	1	2	2	CODD	CODD	CODD only	0	2				2	codd1-4	0	0	1	0	20597	2.44034	0	2.89398	2.30816	1.90256	2.54966	codd
1	13-7-F1	13	pre-treatment	2016-03-07	13	7	7F1	expt sheep	F1	Front left	front foot	left	foot	0	0	0	0	0	0	0	0	0	0	0	0	3	0	0	no disease		1	0				0		0	0	0	0	20520	0	0	0	0	0		codd
1	9-24-F3	9	pre-treatment	2016-02-22	9	24	24F3	expt sheep	F3	Back left	back foot	left	foot	0	0	0	0	0	0	0	0	0	0	0	0	4	0	0	no disease		1					0		0	0	0	0	20506	0	0	0	0	0		no disease
1	21-3-F2	21	pre-treatment	2016-04-04	21	3	3F2	expt sheep	F2	Front right	front foot	right	foot	0	0	0	0	0	0	0	0	0	0	0	0	4	0	0	no disease		1		0			0		0	0	0	0	20548	0	0	0	0	0		codd
1	38-28-F1	38	pre-treatment	2016-05-31	38	28	28F1	expt sheep	F1	Front left	front foot	left	foot	0	0	0	0	0	0	0	0	0	0	0	0	3	0	0	no disease		1	0				0		0	0	0	0	20605	0	0	0	0	0		no disease
0	7-4-F1	7	pre-treatment	2016-02-15	7	4	4F1	expt sheep	F1	Front left	front foot	left	foot	0	0	55.7767	0	16.4565	1	0	0	1	0	1	1	4	0	scald	ID		0	0				0		1	0	0	0	20499	0	0	1.75417	0	1.24196	1.38162	codd
1	35-3-F4	35	pre-treatment	2016-05-23	35	3	3F4	expt sheep	F4	Back right	back foot	right	foot	25.4871	87.7131	1031.81	508.491	237.164	1	0	1	1	1	1	1	2	3	0	no disease		0			0		0		0	0	0	0	20597	1.42303	1.94799	3.01402	2.70714	2.37688	2.77268	no disease
1	41-23-F4	41	pre-treatment	2016-06-06	41	23	23F4	expt sheep	F4	Back right	back foot	right	foot	385.265	0	39602.8	5998.89	3114.88	1	1	0	1	1	1	1	2	2	fr&CODD	CODD	CODD & footrot	0			5		5	codd5	0	0	1	0	20611	2.58688	0	4.59774	3.77814	3.49358	4.21056	codd
1	25-25-F4	25	pre-treatment	2016-04-18	25	25	25F4	expt sheep	F4	Back right	back foot	right	foot	515.79	0	43.2753	0	6.39539	1	1	0	1	0	0	1	3	0	0	no disease		1			0		0		0	0	0	0	20562	2.71331	0	1.64616	0	0.868961	1.21898	no disease
1	31-9-F1	31	pre-treatment	2016-05-09	31	9	9F1	expt sheep	F1	Front left	front foot	left	foot	3952.94	614.601	18947.3	675.014	6068.5	1	1	1	1	1	1	1	3	2	fr&CODD	CODD	CODD & footrot	0	1				1	codd1-4	0	0	1	0	20583	3.59703	2.7893	4.27757	2.82996	3.78315	3.93266	codd
1	23-20-F1	23	pre-treatment	2016-04-11	23	20	20F1	expt sheep	F1	Front left	front foot	left	foot	0	0	0	0	0	0	0	0	0	0	0	0	3	0	0	no disease		0	0				0		0	0	0	0	20555	0	0	0	0	0		no disease
1	27-23-F3	27	pre-treatment	2016-04-25	27	23	23F3	expt sheep	F3	Back left	back foot	left	foot	561.941	0	4174.11	76.0118	1295.46	1	1	0	1	1	1	1	2	3	0	no disease		0				0	0		0	0	0	0	20569	2.75046	0	3.62067	1.88656	3.11276	3.26683	codd
1	11-3-F4	11	pre-treatment	2016-02-29	11	3	3F4	expt sheep	F4	Back right	back foot	right	foot	0	0	0	60.0391	0	1	0	0	0	1	0	1	4	0	0	no disease		0			0		0		0	0	0	0	20513	0	0	0	1.78561	0	1.30131	no disease
1	33-23-F2	33	pre-treatment	2016-05-16	33	23	23F2	expt sheep	F2	Front right	front foot	right	foot	0	0	0	0	0	0	0	0	0	0	0	0	2	3	0	no disease		1		0			0		0	0	0	0	20590	0	0	0	0	0		no disease
1	5-9-F3	5	pre-treatment	2016-02-08	5	9	9F3	expt sheep	F3	Back left	back foot	left	foot	4.75958	0	0	0	0	0	0	0	0	0	0	0	3	0	0	no disease		1				0	0		0	0	0	0	20492	0.760391	0	0	0	0		no disease
1	38-19-F3	38	pre-treatment	2016-05-31	38	19	19F3	expt sheep	F3	Back left	back foot	left	foot	0	0	0	0	0	0	0	0	0	0	0	0	2	0	0	no disease		1				0	0		0	0	0	0	20605	0	0	0	0	0		no disease
1	1-8-F4	1	pre-treatment	2016-01-26	1	8	8F4	expt sheep	F4	Back right	back foot	right	foot	904.76	0	0	0	5.776	1	1	0	0	0	0	0	3	0	0	no disease		1			0		0		0	0	0	0	20479	2.95701	0	0	0	0.830973	0.284506	scald
1	17-27-F2	17	pre-treatment	2016-03-21	17	27	27F2	expt sheep	F2	Front right	front foot	right	foot	0	0	0	0	0	0	0	0	0	0	0	0	4	0	0	no disease		1		0			0		0	0	0	0	20534	0	0	0	0	0		no disease
1	25-1-F1	25	pre-treatment	2016-04-18	25	1	1F1	expt sheep	F1	Front left	front foot	left	foot	0	0	0	0	0	0	0	0	0	0	0	0	3	0	0	no disease		1	0				0		0	0	0	0	20562	0	0	0	0	0		no disease
1	17-21-F4	17	pre-treatment	2016-03-21		21	21F4	expt sheep	F4	Back right	back foot	right	foot	0	0	0	0	0	0	0	0	0	0	0	0			0	no disease					0		0		0	0	0	0		0	0	0	0	0		no disease
1	47-12-F3	47	post-treatment	2016-06-27	47	12	12F3	expt sheep	F3	Back left	back foot	left	foot	0	9877.39	0	0	0	1	0	1	0	0	0	0	2	1	CODD	CODD	CODD only	1				5	5	codd5	0	0	1	0	20632	0	3.99469	0	0	0		codd
1	25-18-F1	25	pre-treatment	2016-04-18	25	18	18F1	expt sheep	F1	Front left	front foot	left	foot	45.7683	0	0	0	0	1	1	0	0	0	0	0	3	0	0	no disease		1	0				0		0	0	0	0	20562	1.66995	0	0	0	0		no disease
1	17-19-F3	17	pre-treatment	2016-03-21	17	19	19F3	expt sheep	F3	Back left	back foot	left	foot	10.095	0	0	0	5.37935	0	0	0	0	0	0	0	3	0	0	no disease		1				0	0		0	0	0	0	20534	1.04513	0	0	0	0.804776	0.253609	no disease
1	17-24-F4	17	pre-treatment	2016-03-21		24	24F4	expt sheep	F4	Back right	back foot	right	foot	10.4387	0	0	0	0	0	0	0	0	0	0	0			0	no disease					0		0		0	0	0	0		1.05838	0	0	0	0		no disease
1	33-9-F2	33	pre-treatment	2016-05-16	33	9	9F2	expt sheep	F2	Front right	front foot	right	foot	459.493	203796	48902.3	1668.8	10479.8	1	1	1	1	1	1	1	3	2	fr&CODD	CODD	CODD & footrot	1		2			2	codd1-4	0	0	1	0	20590	2.66322	5.3092	4.68934	3.22267	4.02039	4.30857	codd
1	29-10-F1	29	pre-treatment	2016-05-03	29	10	10F1	expt sheep	F1	Front left	front foot	left	foot	0	0	0	0	0	0	0	0	0	0	0	0	3	0	0	no disease		1	0				0		0	0	0	0	20577	0	0	0	0	0		no disease
1	51-23-F3	51	post-treatment	2016-07-11	51	23	23F3	expt sheep	F3	Back left	back foot	left	foot	42.5423	0	0	0	0	1	0	0	0	0	0	0	3	0	0	no disease		0				0	0		0	0	0	0	20646	1.63891	0	0	0	0		codd
1	21-12-F4	21	pre-treatment	2016-04-04	21	12	12F4	expt sheep	F4	Back right	back foot	right	foot	22.6487	0	46.787	0	10.9661	1	0	0	1	0	1	1	3	0	0	no disease		1			0		0		0	0	0	0	20548	1.37381	0	1.67931	0	1.07795	1.28445	no disease
1	38-24-F4	38	pre-treatment	2016-05-31	38	24	24F4	expt sheep	F4	Back right	back foot	right	foot	0	0	2.76559	6.58034	5.61433	0	0	0	0	0	0	0	3	0	0	no disease		1			0		0		0	0	0	0	20605	0	0	0.575833	0.879689	0.820486	0.697818	no disease
1	35-26-F4	35	pre-treatment	2016-05-23	35	26	26F4	expt sheep	F4	Back right	back foot	right	foot	0	0	0	11.5312	0	0	0	0	0	0	0	0	3	0	0	no disease		0			0		0		0	0	0	0	20597	0	0	0	1.09799	0	0.584753	no disease
1	33-29-F3	33	pre-treatment	2016-05-16	33	29	29F3	expt sheep	F3	Back left	back foot	left	foot	16.2391	0	26.5349	0	3.06497	1	0	0	0	0	0	0	4	0	0	no disease		1				0	0		0	0	0	0	20590	1.23652	0	1.43988	0	0.609058	0.994168	no disease
1	23-22-F2	23	pre-treatment	2016-04-11	23	22	22F2	expt sheep	F2	Front right	front foot	right	foot	0	0	0	0	0	0	0	0	0	0	0	0	4	0	0	no disease		0		0			0		0	0	0	0	20555	0	0	0	0	0		no disease
1	38-11-F3	38	pre-treatment	2016-05-31	38	11	11F3	expt sheep	F3	Back left	back foot	left	foot	15.6511	26328.8	0	17.3156	496.015	1	0	1	0	0	1	1	3	0	scald	ID		1				0	0		1	0	0	0	20605	1.22144	4.42045	0	1.26282	2.69637	2.23328	scald
1	25-19-F3	25	pre-treatment	2016-04-18	25	19	19F3	expt sheep	F3	Back left	back foot	left	foot	0	0	0	0	0	0	0	0	0	0	0	0	2	0	0	no disease		1				0	0		0	0	0	0	20562	0	0	0	0	0		no disease
1	5-4-F1	5	pre-treatment	2016-02-08	5	4	4F1	expt sheep	F1	Front left	front foot	left	foot	0	0	0	0	0	0	0	0	0	0	0	0	3	0	0	no disease		1	0				0		0	0	0	0	20492	0	0	0	0	0		codd
1	51-13-F4	51	post-treatment	2016-07-11	51	13	13F4	expt sheep	F4	Back right	back foot	right	foot	7.66821	0	0	0	0	0	0	0	0	0	0	0	2	0	0	no disease		0			0		0		0	0	0	0	20646	0.937929	0	0	0	0		no disease
1	43-11-F2	43	post-treatment	2016-06-13	43	11	11F2	expt sheep	F2	Front right	front foot	right	foot	0	386.632	23.3468	34.1037	13.8486	1	0	1	0	1	1	1	2	1	0	no disease		1		0			0		0	0	0	0	20618	0	2.58842	1.38644	1.54535	1.17169	1.37596	scald
0	1-24-F3	1	pre-treatment	2016-01-26	1	24	24F3	expt sheep	F3	Back left	back foot	left	foot	0	0	0	0	0	0	0	0	0	0	0	0	3	0	0	no disease		1				0	0		0	0	0	0	20479	0	0	0	0	0		no disease
0	1-4-F2	1	pre-treatment	2016-01-26	1	4	4F2	expt sheep	F2	Front right	front foot	right	foot	238.232	0	0	0	5.08559	1	1	0	0	0	0	0	3	1	0	no disease		1		0			0		0	0	0	0	20479	2.37882	0	0	0	0.784303	0.229221	scald
0	3-36-F1	3	pre-treatment	2016-02-02	3	36	36F1	source sheep	F1	Front left	front foot	left	foot	0	95.6325	67.8784	4.83009	11.3262	1	0	1	1	0	1	1	3	3	0	no disease		1	0				0		0	0	0	0	20486	0	1.98512	1.83808	0.765675	1.09083	1.44734
1	17-27-F1	17	pre-treatment	2016-03-21	17	27	27F1	expt sheep	F1	Front left	front foot	left	foot	66.0398	0	0	0	0	1	1	0	0	0	0	0	4	0	0	no disease		1	0				0		0	0	0	0	20534	1.82633	0	0	0	0		no disease
1	31-20-F4	31	pre-treatment	2016-05-09	31	20	20F4	expt sheep	F4	Back right	back foot	right	foot	0	0	0	0	0	0	0	0	0	0	0	0	3	0	0	no disease		0			0		0		0	0	0	0	20583	0	0	0	0	0		no disease
1	41-15-F4	41	pre-treatment	2016-06-06	41	15	15F4	expt sheep	F4	Back right	back foot	right	foot	0	0	0	0	0	0	0	0	0	0	0	0	2	3	footrot	FR		0			0		0		0	1	0	0	20611	0	0	0	0	0		footrot
1	47-27-F4	47	post-treatment	2016-06-27	47	27	27F4	expt sheep	F4	Back right	back foot	right	foot	63.8694	88936.6	0	0	0	1	1	1	0	0	0	0	3	0	scald	ID		1			0		0		1	0	0	0	20632	1.81204	4.94909	0	0	0		scald
1	17-18-F2	17	pre-treatment	2016-03-21	17	18	18F2	expt sheep	F2	Front right	front foot	right	foot	0	0	0	0	0	0	0	0	0	0	0	0	3	0	0	no disease		1		0			0		0	0	0	0	20534	0	0	0	0	0		no disease
0	1-22-F3	1	pre-treatment	2016-01-26	1	22	22F3	expt sheep	F3	Back left	back foot	left	foot	0	0	0	0	0	0	0	0	0	0	0	0	3	0	0	no disease		1				0	0		0	0	0	0	20479	0	0	0	0	0		scald
1	11-15-F3	11	pre-treatment	2016-02-29	11	15	15F3	expt sheep	F3	Back left	back foot	left	foot	0	0	0	7.13053	12.0307	0	0	0	0	0	1	1	4	0	0	no disease		0				0	0		0	0	0	0	20513	0	0	0	0.910119	1.11497	0.805301	codd
1	9-17-F4	9	pre-treatment	2016-02-22		17	17F4	expt sheep	F4	Back right	back foot	right	foot	0	0	0	0	0	0	0	0	0	0	0	0			0	no disease					0		0		0	0	0	0		0	0	0	0	0		scald
0	33-44-F3	33	pre-treatment	2016-05-16	33	44	44F3	source sheep	F3	Back left	back foot	left	foot	0	0	0	25.4543	0	1	0	0	0	0	0	0	2	3	0	no disease		1				0	0		0	0	0	0	20590	0	0	0	1.4225	0	0.928639
1	5-8-F4	5	pre-treatment	2016-02-08	5	8	8F4	expt sheep	F4	Back right	back foot	right	foot	0	0	0	0	0	0	0	0	0	0	0	0	3	0	0	no disease		1			0		0		0	0	0	0	20492	0	0	0	0	0		scald
1	33-44-F2	33	pre-treatment	2016-05-16	33	44	44F2	source sheep	F2	Front right	front foot	right	foot	87813.9	0	37014.9	3620.97	18169.7	1	1	0	1	1	1	1	2	3	0	no disease		1		0			0		0	0	0	0	20590	4.94357	0	4.56839	3.55894	4.25937	4.2923
1	9-30-F2	9	pre-treatment	2016-02-22	9	30	30F2	expt sheep	F2	Front right	front foot	right	foot	0	0	0	0	0	0	0	0	0	0	0	0	3	0	0	no disease		1		0			0		0	0	0	0	20506	0	0	0	0	0		scald
1	17-30-F3	17	pre-treatment	2016-03-21	17	30	30F3	expt sheep	F3	Back left	back foot	left	foot	20.0543	0	0	0	4.00781	1	0	0	0	0	0	0	4	0	0	no disease		1					0		0	0	0	0	20534	1.32334	0	0	0	0.699648	0.125786	scald
1	33-22-F2	33	pre-treatment	2016-05-16	33	22	22F2	expt sheep	F2	Front right	front foot	right	foot	0	0	0	0	0	0	0	0	0	0	0	0	3	0	0	no disease		1		0			0		0	0	0	0	20590	0	0	0	0	0		no disease
1	35-10-F3	35	pre-treatment	2016-05-23	35	10	10F3	expt sheep	F3	Back left	back foot	left	foot	0	0	0	0.989723	0	0	0	0	0	0	0	0	3	2	0	no disease		0				0	0		0	0	0	0	20597	0	0	0	0.298793	0	-0.481607	no disease
1	31-14-F3	31	pre-treatment	2016-05-09	31	14	14F3	expt sheep	F3	Back left	back foot	left	foot	38899.8	2715.95	28154	33.8889	6432.24	1	1	1	1	1	1	1	2	3	fr&CODD	CODD	CODD & footrot	0				1	1	codd1-4	0	0	1	0	20583	4.58996	3.43408	4.44956	1.54269	3.80843	4.06221	codd
1	33-48-F2	33	pre-treatment	2016-05-16	33	48	48F2	source sheep	F2	Front right	front foot	right	foot	8562.5	0	389606	14830.5	34893.5	1	1	0	1	1	1	1	2	3	CODD	CODD	CODD only	1		4			4	codd1-4	0	0	1	0	20590	3.93265	0	5.59063	4.17118	4.54276	5.16567
1	31-7-F2	31	pre-treatment	2016-05-09	31	7	7F2	expt sheep	F2	Front right	front foot	right	foot	2721.4	46536.6	37241.6	354.748	5401.74	1	1	1	1	1	1	1	3	0	0	no disease		0		0			0		0	0	0	0	20583	3.43495	4.6678	4.57104	2.55114	3.73261	4.15633	codd
1	27-10-F4	27	pre-treatment	2016-04-25	27	10	10F4	expt sheep	F4	Back right	back foot	right	foot	6.70575	1869.74	0	0	0	1	0	1	0	0	0	0	3	0	0	no disease		0			0		0		0	0	0	0	20569	0.886815	3.27201	0	0	0		codd
1	15-26-F3	15	pre-treatment	2016-03-14	15	26	26F3	expt sheep	F3	Back left	back foot	left	foot	0	0	0	0	6.33233	0	0	0	0	0	0	0	3	0	0	no disease		0				0	0		0	0	0	0	20527	0	0	0	0	0.865242	0.324442	no disease
0	29-21-F2	29	pre-treatment	2016-05-03	29	21	21F2	expt sheep	F2	Front right	front foot	right	foot	0	0	22.8005	0	0	1	0	0	0	0	0	0	3	0	0	no disease		1		0			0		0	0	0	0	20577	0	0	1.37659	0	0	0.880824	no disease
1	13-13-F2	13	pre-treatment	2016-03-07	13	13	13F2	expt sheep	F2	Front right	front foot	right	foot	25.4256	0	0	0	5.58473	1	0	0	0	0	0	0	3	0	0	no disease		1		0			0		0	0	0	0	20520	1.42202	0	0	0	0.818538	0.269881	no disease
1	38-23-F3	38	pre-treatment	2016-05-31	38	23	23F3	expt sheep	F3	Back left	back foot	left	foot	0	0	0	0	0	0	0	0	0	0	0	0	2	3	0	no disease		1				0	0		0	0	0	0	20605	0	0	0	0	0		codd
1	7-20-F1	7	pre-treatment	2016-02-15	7	20	20F1	expt sheep	F1	Front left	front foot	left	foot	0	0	0	0	0	0	0	0	0	0	0	0	4	0	0	no disease		0	0				0		0	0	0	0	20499	0	0	0	0	0		no disease
1	27-4-F4	27	pre-treatment	2016-04-25	27	4	4F4	expt sheep	F4	Back right	back foot	right	foot	22.9817	0	0	10.2271	0	1	0	0	0	0	0	0	3	0	0	no disease		0			0		0		0	0	0	0	20569	1.37988	0	0	1.05027	0	0.532631	no disease
1	21-19-F3	21	pre-treatment	2016-04-04	21	19	19F3	expt sheep	F3	Back left	back foot	left	foot	0	122.371	0	0	4.07952	1	0	1	0	0	0	0	2	0	0	no disease		1				0	0		0	0	0	0	20548	0	2.09121	0	0	0.705823	0.133488	no disease
1	23-8-F3	23	pre-treatment	2016-04-11	23	8	8F3	expt sheep	F3	Back left	back foot	left	foot	6696.81	22977.5	0	5.62844	0	1	1	1	0	0	0	0	3	0	IDH	other		0				0	0		0	0	0	1	20555	3.82593	4.36132	0	0.821411	0	0.273267	codd
1	17-25-F2	17	pre-treatment	2016-03-21	17	25	25F2	expt sheep	F2	Front right	front foot	right	foot	0	0	0	0	0	0	0	0	0	0	0	0	4	0	0	no disease		1		0			0		0	0	0	0	20534	0	0	0	0	0		no disease
0	29-6-F4	29	pre-treatment	2016-05-03	29	6	6F4	expt sheep	F4	Back right	back foot	right	foot	0	0	0	0	0	0	0	0	0	0	0	0	3	0	0	no disease		1			0		0		0	0	0	0	20577	0	0	0	0	0		no disease
1	51-12-F3	51	post-treatment	2016-07-11	51	12	12F3	expt sheep	F3	Back left	back foot	left	foot	0	46260.2	0	0	0	1	0	1	0	0	0	0	3	2	footrot	FR		0				0	0		0	1	0	0	20646	0	4.66522	0	0	0		codd
1	7-9-F2	7	pre-treatment	2016-02-15	7	9	9F2	expt sheep	F2	Front right	front foot	right	foot	0	0	0	0	0	0	0	0	0	0	0	0	3	0	0	no disease		0		0			0		0	0	0	0	20499	0	0	0	0	0		codd
1	38-29-F3	38	pre-treatment	2016-05-31	38	29	29F3	expt sheep	F3	Back left	back foot	left	foot	0	110.551	0	0	0	1	0	1	0	0	0	0	3	0	0	no disease		1				0	0		0	0	0	0	20605	0	2.04747	0	0	0		no disease
1	25-27-F1	25	pre-treatment	2016-04-18	25	27	27F1	expt sheep	F1	Front left	front foot	left	foot	0	71.2849	40.0751	9.23573	4.56469	1	0	1	1	0	0	1	3	0	0	no disease		1	0				0		0	0	0	0	20562	0	1.85905	1.61358	1.01012	0.745441	1.25427	no disease
1	38-9-F1	38	pre-treatment	2016-05-31	38	9	9F1	expt sheep	F1	Front left	front foot	left	foot	0	817.159	0	7.61902	13.2054	1	0	1	0	0	1	1	3	1	CODD	CODD	CODD only	1	4				4	codd1-4	0	0	1	0	20605	0	2.91284	0	0.935458	1.15245	0.841452	codd
1	17-17-F4	17	pre-treatment	2016-03-21		17	17F4	expt sheep	F4	Back right	back foot	right	foot	0	0	0	0	0	0	0	0	0	0	0	0			0	no disease					0		0		0	0	0	0		0	0	0	0	0		scald
0	35-4-F2	35	pre-treatment	2016-05-23	35	4	4F2	expt sheep	F2	Front right	front foot	right	foot	0	0	0	9.73415	0	0	0	0	0	0	0	0	2	3	0	no disease		0		0			0		0	0	0	0	20597	0	0	0	1.03077	0	0.511177	scald
1	51-12-F2	51	post-treatment	2016-07-11	51	12	12F2	expt sheep	F2	Front right	front foot	right	foot	0	0	0	0	0	0	0	0	0	0	0	0	3	2	0	no disease		0		0			0		0	0	0	0	20646	0	0	0	0	0		codd
1	51-18-F4	51	post-treatment	2016-07-11	51	18	18F4	expt sheep	F4	Back right	back foot	right	foot	0	0	0	0	4.42538	0	0	0	0	0	0	0	3	0	0	no disease		0			0		0		0	0	0	0	20646	0	0	0	0	0.734431	0.16883	no disease
1	17-26-F4	17	pre-treatment	2016-03-21		26	26F4	expt sheep	F4	Back right	back foot	right	foot	10.8298	0	0	0	7.08139	0	0	0	0	0	0	0			0	no disease					0		0		0	0	0	0		1.07298	0	0	0	0.907486	0.372998	no disease
1	27-7-F1	27	pre-treatment	2016-04-25	27	7	7F1	expt sheep	F1	Front left	front foot	left	foot	1368.97	993.087	315.247	86.5601	38.5291	1	1	1	1	1	1	1	3	3	scald	ID		0	0				0		1	0	0	0	20569	3.13671	2.99742	2.50003	1.94231	1.59692	2.16666	codd
1	27-8-F2	27	pre-treatment	2016-04-25	27	8	8F2	expt sheep	F2	Front right	front foot	right	foot	0	0	0	0	10.3596	0	0	0	0	0	1	1	3	3	0	no disease		0		0			0		0	0	0	0	20569	0	0	0	0	1.05536	0.538223	no disease
1	43-29-F2	43	post-treatment	2016-06-13	43	29	29F2	expt sheep	F2	Front right	front foot	right	foot	0	213.308	89.0206	0.88667	12.0603	1	0	1	1	0	1	1	3	1	0	no disease		1		0			0		0	0	0	0	20618	0	2.33104	1.95434	0.275696	1.11595	1.53134	no disease
1	29-19-F3	29	pre-treatment	2016-05-03	29	19	19F3	expt sheep	F3	Back left	back foot	left	foot	31.5236	0	73.5738	2.70062	7.43613	1	0	0	1	0	0	1	2	0	0	no disease		1				0	0		0	0	0	0	20577	1.5122	0	1.87259	0.568274	0.926143	1.44566	no disease
1	38-24-F3	38	pre-treatment	2016-05-31	38	24	24F3	expt sheep	F3	Back left	back foot	left	foot	21.5842	0	0	0	0	1	0	0	0	0	0	0	3	0	0	no disease		1				0	0		0	0	0	0	20605	1.3538	0	0	0	0		no disease
1	33-8-F2	33	pre-treatment	2016-05-16	33	8	8F2	expt sheep	F2	Front right	front foot	right	foot	0	0	0	0	0	0	0	0	0	0	0	0	2	3	0	no disease		1		0			0		0	0	0	0	20590	0	0	0	0	0		no disease
1	41-13-F3	41	pre-treatment	2016-06-06	41	13	13F3	expt sheep	F3	Back left	back foot	left	foot	32.571	0	0	4.70483	8.74099	1	0	0	0	0	0	0	2	0	0	no disease		0				0	0		0	0	0	0	20611	1.52596	0	0	0.756242	0.988603	0.651466	no disease
1	5-7-F4	5	pre-treatment	2016-02-08	5	7	7F4	expt sheep	F4	Back right	back foot	right	foot	0	0	0	5.53833	0	0	0	0	0	0	0	0	3	0	0	no disease		1			0		0		0	0	0	0	20492	0	0	0	0.815467	0	0.266257	scald
0	17-12-F4	17	pre-treatment	2016-03-21		12	12F4	expt sheep	F4	Back right	back foot	right	foot	0	0	0	0	0	0	0	0	0	0	0	0			0	no disease					0		0		0	0	0	0		0	0	0	0	0		no disease
1	5-3-F1	5	pre-treatment	2016-02-08	5	3	3F1	expt sheep	F1	Front left	front foot	left	foot	0	0	0	0	0	0	0	0	0	0	0	0	3	0	0	no disease		1	0				0		0	0	0	0	20492	0	0	0	0	0		codd
1	27-11-F4	27	pre-treatment	2016-04-25	27	11	11F4	expt sheep	F4	Back right	back foot	right	foot	0	0	0	0	0	0	0	0	0	0	0	0	3	0	0	no disease		0			0		0		0	0	0	0	20569	0	0	0	0	0		no disease
1	21-27-F2	21	pre-treatment	2016-04-04	21	27	27F2	expt sheep	F2	Front right	front foot	right	foot	0	0	0	0	0	0	0	0	0	0	0	0	3	0	0	no disease		1		0			0		0	0	0	0	20548	0	0	0	0	0		no disease
1	9-7-F2	9	pre-treatment	2016-02-22	9	7	7F2	expt sheep	F2	Front right	front foot	right	foot	0	0	0	0	0	0	0	0	0	0	0	0	3	0	0	no disease		1					0		0	0	0	0	20506	0	0	0	0	0		codd
1	15-24-F3	15	pre-treatment	2016-03-14	15	24	24F3	expt sheep	F3	Back left	back foot	left	foot	12.3908	0	0	0	3.33164	0	0	0	0	0	0	0	4	0	0	no disease		0				0	0		0	0	0	0	20527	1.1268	0	0	0	0.636652	0.0455365	no disease
1	11-27-F4	11	pre-treatment	2016-02-29	11	27	27F4	expt sheep	F4	Back right	back foot	right	foot	0	0	0	0	0	0	0	0	0	0	0	0	3	0	0	no disease		0			0		0		0	0	0	0	20513	0	0	0	0	0		scald
1	47-7-F4	47	post-treatment	2016-06-27	47	7	7F4	expt sheep	F4	Back right	back foot	right	foot	0	6315.51	0	0	0	1	0	1	0	0	0	0	2	0	scald	ID		1			0		0		1	0	0	0	20632	0	3.80048	0	0	0		scald
1	11-6-F2	11	pre-treatment	2016-02-29	11	6	6F2	expt sheep	F2	Front right	front foot	right	foot	26.4371	0	0	2.9017	2.80543	1	0	0	0	0	0	0	4	0	0	no disease		0		0			0		0	0	0	0	20513	1.43834	0	0	0.591254	0.580403	0.279297	footrot
1	33-43-F1	33	pre-treatment	2016-05-16	33	43	43F1	source sheep	F1	Front left	front foot	left	foot	15026.8	236.028	46969.5	22.9189	1801.28	1	1	1	1	0	1	1	3	3	0	no disease		1	0				0		0	0	0	0	20590	4.1769	2.3748	4.67183	1.37874	3.25582	4.21124
0	27-2-F4	27	pre-treatment	2016-04-25	27	2	2F4	expt sheep	F4	Back right	back foot	right	foot	5089.81	45568	0	0	9.58552	1	1	1	0	0	0	0	3	3	0	no disease		0			0		0		0	0	0	0	20569	3.70679	4.65867	0	0	1.02471	0.504494	footrot
1	5-7-F3	5	pre-treatment	2016-02-08	5	7	7F3	expt sheep	F3	Back left	back foot	left	foot	0	0	0	0	0	0	0	0	0	0	0	0	3	0	0	no disease		1				0	0		0	0	0	0	20492	0	0	0	0	0		scald
1	1-13-F1	1	pre-treatment	2016-01-26	1	13	13F1	expt sheep	F1	Front left	front foot	left	foot	0	0	0	0	0	0	0	0	0	0	0	0	2	0	0	no disease		1	0				0		0	0	0	0	20479	0	0	0	0	0		no disease
1	47-7-F1	47	post-treatment	2016-06-27	47	7	7F1	expt sheep	F1	Front left	front foot	left	foot	0	55.6549	0	0	0	1	0	0	0	0	0	0	2	0	0	no disease		1	0				0		0	0	0	0	20632	0	1.75324	0	0	0		codd
1	51-26-F3	51	post-treatment	2016-07-11	51	26	26F3	expt sheep	F3	Back left	back foot	left	foot	157.808	0	0	0	66.4417	1	1	0	0	0	1	1	3	3	0	no disease		0				0	0		0	0	0	0	20646	2.20087	0	0	0	1.82893	1.34532	no disease
1	13-6-F1	13	pre-treatment	2016-03-07	13	6	6F1	expt sheep	F1	Front left	front foot	left	foot	276.792	0	0	0	0	1	1	0	0	0	0	0	3	0	0	no disease		1	0				0		0	0	0	0	20520	2.44372	0	0	0	0		codd
1	1-6-F4	1	pre-treatment	2016-01-26	1	6	6F4	expt sheep	F4	Back right	back foot	right	foot	33.3341	0	0	0	0	1	0	0	0	0	0	0	3	0	0	no disease		1			0		0		0	0	0	0	20479	1.53573	0	0	0	0		no disease
1	5-18-F3	5	pre-treatment	2016-02-08	5	18	18F3	expt sheep	F3	Back left	back foot	left	foot	0	0	0	0	0	0	0	0	0	0	0	0	3	0	0	no disease		1				0	0		0	0	0	0	20492	0	0	0	0	0		no disease
1	23-17-F4	23	pre-treatment	2016-04-11	23	17	17F4	expt sheep	F4	Back right	back foot	right	foot	0	0	0	0	0	0	0	0	0	0	0	0	3	0	0	no disease		0			0		0		0	0	0	0	20555	0	0	0	0	0		scald
0	17-11-F3	17	pre-treatment	2016-03-21	17	11	11F3	expt sheep	F3	Back left	back foot	left	foot	0	0	0	0	0	0	0	0	0	0	0	0	3	0	0	no disease		1					0		0	0	0	0	20534	0	0	0	0	0		scald
1	33-18-F3	33	pre-treatment	2016-05-16	33	18	18F3	expt sheep	F3	Back left	back foot	left	foot	0	0	44.9957	0	2.62593	1	0	0	1	0	0	1	3	0	0	no disease		1				0	0		0	0	0	0	20590	0	0	1.66272	0	0.559419	1.20068	no disease
1	9-30-F3	9	pre-treatment	2016-02-22	9	30	30F3	expt sheep	F3	Back left	back foot	left	foot	0	0	0	0	0	0	0	0	0	0	0	0	3	0	0	no disease		1					0		0	0	0	0	20506	0	0	0	0	0		scald
1	5-28-F2	5	pre-treatment	2016-02-08	5	28	28F2	expt sheep	F2	Front right	front foot	right	foot	0	0	0	0	2.84713	0	0	0	0	0	0	0	3	0	0	no disease		1		0			0		0	0	0	0	20492	0	0	0	0	0.585137	-0.0227142	footrot
1	47-2-F3	47	post-treatment	2016-06-27	47	2	2F3	expt sheep	F3	Back left	back foot	left	foot	0	3243.02	0	0	0	1	0	1	0	0	0	0	3	0	0	no disease		1				0	0		0	0	0	0	20632	0	3.51108	0	0	0		footrot
1	17-5-F2	17	pre-treatment	2016-03-21	17	5	5F2	expt sheep	F2	Front right	front foot	right	foot	33.7403	0	0	0	3.7927	1	0	0	0	0	0	0	3	0	0	no disease		1		0			0		0	0	0	0	20534	1.54083	0	0	0	0.68058	0.101827	codd
1	17-7-F2	17	pre-treatment	2016-03-21	17	7	7F2	expt sheep	F2	Front right	front foot	right	foot	0	0	0	0	0	0	0	0	0	0	0	0	3	0	0	no disease		1		0			0		0	0	0	0	20534	0	0	0	0	0		codd
1	51-4-F4	51	post-treatment	2016-07-11		4	4F4	expt sheep	F4	Back right	back foot	right	foot	24.8354	0	0	0.734119	0	1	0	0	0	0	0	0			0	no disease					0		0		0	0	0	0		1.41222	0	0	0.239079	0	-0.611355	no disease
1	19-12-F4	19	pre-treatment	2016-03-28	19	12	12F4	expt sheep	F4	Back right	back foot	right	foot	0	0	0	0	0	0	0	0	0	0	0	0	3	0	0	no disease		0			0		0		0	0	0	0	20541	0	0	0	0	0		no disease
1	33-8-F3	33	pre-treatment	2016-05-16	33	8	8F3	expt sheep	F3	Back left	back foot	left	foot	74052.1	37775.4	120566	2153.12	24178.6	1	1	1	1	1	1	1	2	3	fr&CODD	CODD	CODD & footrot	1				2	2	codd1-4	0	0	1	0	20590	4.86954	4.57722	5.08123	3.33327	4.38345	4.68989	codd
1	13-27-F4	13	pre-treatment	2016-03-07	13	27	27F4	expt sheep	F4	Back right	back foot	right	foot	28.773	0	147.441	2.43627	17.6235	1	0	0	1	0	1	1	3	0	0	no disease		1			0		0		0	0	0	0	20520	1.47382	0	2.17156	0.536087	1.27006	1.7469	scald
1	31-11-F2	31	pre-treatment	2016-05-09	31	11	11F2	expt sheep	F2	Front right	front foot	right	foot	0	823.288	0	0	0	1	0	1	0	0	0	0	3	0	0	no disease		0		0			0		0	0	0	0	20583	0	2.91608	0	0	0		scald
1	9-17-F2	9	pre-treatment	2016-02-22	9	17	17F2	expt sheep	F2	Front right	front foot	right	foot	0	0	0	0	5.27103	0	0	0	0	0	0	0	4	0	0	no disease		1					0		0	0	0	0	20506	0	0	0	0	0.797339	0.244774	codd
1	1-8-F1	1	pre-treatment	2016-01-26	1	8	8F1	expt sheep	F1	Front left	front foot	left	foot	10.197	0	0	0	0	0	0	0	0	0	0	0	3	0	0	no disease		1	0				0		0	0	0	0	20479	1.0491	0	0	0	0		no disease
1	21-2-F1	21	pre-treatment	2016-04-04	21	2	2F1	expt sheep	F1	Front left	front foot	left	foot	49.7675	0	33.3033	6.28629	2.89619	1	1	0	1	0	0	1	4	0	0	no disease		1	0				0		0	0	0	0	20548	1.70559	0	1.53534	0.862507	0.59064	1.15112	footrot
1	41-24-F4	41	pre-treatment	2016-06-06	41	24	24F4	expt sheep	F4	Back right	back foot	right	foot	58.5439	0	38.8501	6.22274	5.50566	1	1	0	1	0	0	1	3	0	0	no disease		0			0		0		0	0	0	0	20611	1.77484	0	1.60043	0.858702	0.813291	1.22684	no disease
1	19-20-F2	19	pre-treatment	2016-03-28	19	20	20F2	expt sheep	F2	Front right	front foot	right	foot	0	0	0	0	0	0	0	0	0	0	0	0	3	0	0	no disease		0		0			0		0	0	0	0	20541	0	0	0	0	0		no disease
1	43-21-F1	43	post-treatment	2016-06-13	43	21	21F1	expt sheep	F1	Front left	front foot	left	foot	0	0	0	0	0	0	0	0	0	0	0	0	3	0	0	no disease		1	0				0		0	0	0	0	20618	0	0	0	0	0		no disease
1	51-24-F1	51	post-treatment	2016-07-11	51	24	24F1	expt sheep	F1	Front left	front foot	left	foot	0	0	0	0	0	0	0	0	0	0	0	0	3	0	0	no disease		0	0				0		0	0	0	0	20646	0	0	0	0	0		no disease
1	11-22-F1	11	pre-treatment	2016-02-29	11	22	22F1	expt sheep	F1	Front left	front foot	left	foot	0	0	0	0	0	0	0	0	0	0	0	0	4	0	0	no disease		0	0				0		0	0	0	0	20513	0	0	0	0	0		scald
1	15-28-F4	15	pre-treatment	2016-03-14	15	28	28F4	expt sheep	F4	Back right	back foot	right	foot	19.8361	0	0	2.14295	8.87514	0	0	0	0	0	0	0	3	0	0	no disease		0			0		0		0	0	0	0	20527	1.31882	0	0	0.497337	0.994543	0.564985	scald
1	9-10-F3	9	pre-treatment	2016-02-22	9	10	10F3	expt sheep	F3	Back left	back foot	left	foot	0	0	0	0	0	0	0	0	0	0	0	0	3	0	0	no disease		1					0		0	0	0	0	20506	0	0	0	0	0		no disease
1	41-29-F1	41	pre-treatment	2016-06-06	41	29	29F1	expt sheep	F1	Front left	front foot	left	foot	1052.12	9473.77	86.6329	25.5007	60.5339	1	1	1	1	0	1	1	3	0	0	no disease		0	0				0		0	0	0	0	20611	3.02248	3.97657	1.94267	1.42326	1.78911	1.76009	footrot
1	25-15-F4	25	pre-treatment	2016-04-18	25	15	15F4	expt sheep	F4	Back right	back foot	right	foot	0	0	0	0	0	0	0	0	0	0	0	0	2	3	0	no disease		1			0		0		0	0	0	0	20562	0	0	0	0	0		footrot
1	9-28-F1	9	pre-treatment	2016-02-22	9	28	28F1	expt sheep	F1	Front left	front foot	left	foot	0	0	0	0	0	0	0	0	0	0	0	0	4	0	0	no disease		1	0				0		0	0	0	0	20506	0	0	0	0	0		no disease
1	9-6-F3	9	pre-treatment	2016-02-22	9	6	6F3	expt sheep	F3	Back left	back foot	left	foot	0	0	0	0.763034	3.18725	0	0	0	0	0	0	0	4	0	0	no disease		1					0		0	0	0	0	20506	0	0	0	0.246261	0.621928	0.119507	no disease
1	38-16-F3	38	pre-treatment	2016-05-31	38	16	16F3	expt sheep	F3	Back left	back foot	left	foot	0	0	0	0	3.86803	0	0	0	0	0	0	0	3	0	0	no disease		1				0	0		0	0	0	0	20605	0	0	0	0	0.687353	0.110368	no disease
1	1-12-F1	1	pre-treatment	2016-01-26	1	12	12F1	expt sheep	F1	Front left	front foot	left	foot	39.5029	0	34.8568	0	14.4074	1	0	0	1	0	1	1	2	0	0	no disease		1	0				0		0	0	0	0	20479	1.60749	0	1.55457	0	1.18773	1.21541	no disease
1	15-27-F3	15	pre-treatment	2016-03-14	15	27	27F3	expt sheep	F3	Back left	back foot	left	foot	909.662	0	0	3.41035	17.3543	1	1	0	0	0	1	1	4	0	0	no disease		0				0	0		0	0	0	0	20527	2.95936	0	0	0.644473	1.26374	0.840204	no disease
1	47-10-F1	47	post-treatment	2016-06-27	47	10	10F1	expt sheep	F1	Front left	front foot	left	foot	0	0	0	0	0	0	0	0	0	0	0	0	3	0	0	no disease		1	0				0		0	0	0	0	20632	0	0	0	0	0		no disease
1	13-24-F3	13	pre-treatment	2016-03-07	13	24	24F3	expt sheep	F3	Back left	back foot	left	foot	14.8159	0	0	3.42224	10.2327	0	0	0	0	0	0	0	3	0	0	no disease		1				0	0		0	0	0	0	20520	1.19909	0	0	0.645642	1.05049	0.658169	no disease
1	31-12-F2	31	pre-treatment	2016-05-09	31	12	12F2	expt sheep	F2	Front right	front foot	right	foot	2507.05	9340.48	4527.52	106.598	456.474	1	1	1	1	1	1	1	3	3	footrot	FR		0		0			0		0	1	0	0	20583	3.39934	3.97042	3.65596	2.0318	2.66037	3.22965	codd
0	35-25-F3	35	pre-treatment	2016-05-23	35	25	25F3	expt sheep	F3	Back left	back foot	left	foot	19.5744	0	96.6703	0	16.5575	1	0	0	1	0	1	1	3	0	0	no disease		0				0	0		0	0	0	0	20597	1.31333	0	1.98976	0	1.24446	1.57683	no disease
1	5-18-F1	5	pre-treatment	2016-02-08	5	18	18F1	expt sheep	F1	Front left	front foot	left	foot	0	0	0	0	0	0	0	0	0	0	0	0	3	0	0	no disease		1	0				0		0	0	0	0	20492	0	0	0	0	0		no disease
1	17-2-F3	17	pre-treatment	2016-03-21	17	2	2F3	expt sheep	F3	Back left	back foot	left	foot	0	0	0	0	6.04152	0	0	0	0	0	0	0	4	0	0	no disease		1					0		0	0	0	0	20534	0	0	0	0	0.847667	0.304025	footrot
1	23-27-F3	23	pre-treatment	2016-04-11	23	27	27F3	expt sheep	F3	Back left	back foot	left	foot	38.3482	0	29.453	0	5.6742	1	0	0	0	0	0	0	3	0	0	no disease		0				0	0		0	0	0	0	20555	1.59492	0	1.48363	0	0.824399	1.06852	no disease
1	33-1-F1	33	pre-treatment	2016-05-16	33	1	1F1	expt sheep	F1	Front left	front foot	left	foot	11.4769	0	0	0	0	0	0	0	0	0	0	0	3	0	0	no disease		1	0				0		0	0	0	0	20590	1.09611	0	0	0	0		no disease
0	35-20-F4	35	pre-treatment	2016-05-23	35	20	20F4	expt sheep	F4	Back right	back foot	right	foot	0	0	0	0	5.64799	0	0	0	0	0	0	0	2	0	0	no disease		0			0		0		0	0	0	0	20597	0	0	0	0	0.822691	0.274773	no disease
0	5-26-F3	5	pre-treatment	2016-02-08	5	26	26F3	expt sheep	F3	Back left	back foot	left	foot	0	0	0	0	13.3186	0	0	0	0	0	1	1	3	0	0	no disease		1				0	0		0	0	0	0	20492	0	0	0	0	1.1559	0.647339	no disease
1	15-7-F3	15	pre-treatment	2016-03-14	15	7	7F3	expt sheep	F3	Back left	back foot	left	foot	0	0	0	0	0	0	0	0	0	0	0	0	4	0	scald	ID		0				0	0		1	0	0	0	20527	0	0	0	0	0		scald
0	1-24-F4	1	pre-treatment	2016-01-26	1	24	24F4	expt sheep	F4	Back right	back foot	right	foot	0	0	0	0	8.19631	0	0	0	0	0	0	0	3	0	0	no disease		1			0		0		0	0	0	0	20479	0	0	0	0	0.963614	0.436497	no disease
1	47-20-F1	47	post-treatment	2016-06-27	47	20	20F1	expt sheep	F1	Front left	front foot	left	foot	0	0	0	0	0	0	0	0	0	0	0	0	2	0	0	no disease		1	0				0		0	0	0	0	20632	0	0	0	0	0		no disease
0	17-12-F2	17	pre-treatment	2016-03-21	17	12	12F2	expt sheep	F2	Front right	front foot	right	foot	0	0	0	0	0	0	0	0	0	0	0	0	2	0	0	no disease		1		0			0		0	0	0	0	20534	0	0	0	0	0		codd
1	33-24-F3	33	pre-treatment	2016-05-16	33	24	24F3	expt sheep	F3	Back left	back foot	left	foot	0	0	0	0	0	0	0	0	0	0	0	0	3	0	0	no disease		1				0	0		0	0	0	0	20590	0	0	0	0	0		no disease
1	21-23-F3	21	pre-treatment	2016-04-04	21	23	23F3	expt sheep	F3	Back left	back foot	left	foot	6012.19	0	0	0	0	1	1	0	0	0	0	0	2	3	scald	ID		1				0	0		1	0	0	0	20548	3.7791	0	0	0	0		codd
1	33-11-F4	33	pre-treatment	2016-05-16	33	11	11F4	expt sheep	F4	Back right	back foot	right	foot	12.9077	0	43.9207	1.75384	12.5919	1	0	0	1	0	1	1	2	1	0	no disease		1			0		0		0	0	0	0	20590	1.14326	0	1.65245	0.439938	1.13328	1.2883	no disease
1	31-17-F1	31	pre-treatment	2016-05-09	31	17	17F1	expt sheep	F1	Front left	front foot	left	foot	0	0	0	0	0	0	0	0	0	0	0	0	3	0	0	no disease		0	0				0		0	0	0	0	20583	0	0	0	0	0		no disease
0	11-20-F1	11	pre-treatment	2016-02-29	11	20	20F1	expt sheep	F1	Front left	front foot	left	foot	12.962	0	0	10.488	0	0	0	0	0	0	0	0	3	0	0	no disease		0	0				0		0	0	0	0	20513	1.14495	0	0	1.06024	0	0.543572	no disease
1	29-17-F4	29	pre-treatment	2016-05-03	29	17	17F4	expt sheep	F4	Back right	back foot	right	foot	0	0	0	0	2.43352	0	0	0	0	0	0	0	3	0	0	no disease		1			0		0		0	0	0	0	20577	0	0	0	0	0.53574	-0.0908855	scald
1	7-12-F2	7	pre-treatment	2016-02-15	7	12	12F2	expt sheep	F2	Front right	front foot	right	foot	10.5791	0	0	0	11.0247	0	0	0	0	0	1	1	4	0	0	no disease		0		0			0		0	0	0	0	20499	1.06368	0	0	0	1.08008	0.565247	codd
1	23-8-F4	23	pre-treatment	2016-04-11	23	8	8F4	expt sheep	F4	Back right	back foot	right	foot	0	0	0	0	0	0	0	0	0	0	0	0	3	0	0	no disease		0			0		0		0	0	0	0	20555	0	0	0	0	0		scald
1	30-41-F3	30	pre-treatment	2016-05-04	30	41	41F3	source sheep	F3	Back left	back foot	left	foot	19.4376	0	0	4.3398	0	0	0	0	0	0	0	0	2	3	0	no disease		1				0	0		0	0	0	0	20578	1.31043	0	0	0.727525	0	0.160348
1	15-22-F1	15	pre-treatment	2016-03-14	15	22	22F1	expt sheep	F1	Front left	front foot	left	foot	0	0	0	0	0	0	0	0	0	0	0	0	4	0	0	no disease		0	0				0		0	0	0	0	20527	0	0	0	0	0		scald
1	19-7-F3	19	pre-treatment	2016-03-28	19	7	7F3	expt sheep	F3	Back left	back foot	left	foot	0	0	0	0	0	0	0	0	0	0	0	0	3	0	0	no disease		0				0	0		0	0	0	0	20541	0	0	0	0	0		scald
1	25-8-F3	25	pre-treatment	2016-04-18	25	8	8F3	expt sheep	F3	Back left	back foot	left	foot	2283.54	129172	0	6097.73	6476	1	1	1	0	1	1	1	3	2	IDH	other		1				0	0		0	0	0	1	20562	3.3588	5.11117	0	3.78524	3.81137	3.62234	codd
1	13-4-F4	13	pre-treatment	2016-03-07	13	4	4F4	expt sheep	F4	Back right	back foot	right	foot	46.1234	0	0	0	0	1	1	0	0	0	0	0	3	0	0	no disease		1			0		0		0	0	0	0	20520	1.67324	0	0	0	0		no disease
1	51-7-F2	51	post-treatment	2016-07-11	51	7	7F2	expt sheep	F2	Front right	front foot	right	foot	0	0	0	0	0	0	0	0	0	0	0	0	2	0	0	no disease		0		0			0		0	0	0	0	20646	0	0	0	0	0		codd
1	19-28-F4	19	pre-treatment	2016-03-28	19	28	28F4	expt sheep	F4	Back right	back foot	right	foot	0	0	0	0	0	0	0	0	0	0	0	0	4	0	0	no disease		0			0		0		0	0	0	0	20541	0	0	0	0	0		scald
1	43-22-F2	43	post-treatment	2016-06-13	43	22	22F2	expt sheep	F2	Front right	front foot	right	foot	0	0	0	0	0	0	0	0	0	0	0	0	3	0	0	no disease		1		0			0		0	0	0	0	20618	0	0	0	0	0		no disease
1	30-41-F4	30	pre-treatment	2016-05-04	30	41	41F4	source sheep	F4	Back right	back foot	right	foot	5543.4	0	46257	45.7696	2725.56	1	1	0	1	1	1	1	2	3	CODD	CODD	CODD only	1			2		2	codd1-4	0	0	1	0	20578	3.74385	0	4.66519	1.66996	3.43562	4.21333
1	43-14-F3	43	post-treatment	2016-06-13	43	14	14F3	expt sheep	F3	Back left	back foot	left	foot	2630.46	18795.1	83058.5	32709	20983	1	1	1	1	1	1	1	1	3	CODD	CODD	CODD only	1				3	3	codd1-4	0	0	1	0	20618	3.4202	4.27407	4.91939	4.51468	4.32189	4.65881	codd
1	17-29-F3	17	pre-treatment	2016-03-21	17	29	29F3	expt sheep	F3	Back left	back foot	left	foot	32.5424	0	0	0	0	1	0	0	0	0	0	0	4	0	0	no disease		1				0	0		0	0	0	0	20534	1.52559	0	0	0	0		no disease
1	19-7-F4	19	pre-treatment	2016-03-28	19	7	7F4	expt sheep	F4	Back right	back foot	right	foot	0	0	0	0	0	0	0	0	0	0	0	0	3	0	0	no disease		0			0		0		0	0	0	0	20541	0	0	0	0	0		scald
1	17-28-F2	17	pre-treatment	2016-03-21	17	28	28F2	expt sheep	F2	Front right	front foot	right	foot	0	0	0	0	0	0	0	0	0	0	0	0	3	0	0	no disease		1		0			0		0	0	0	0	20534	0	0	0	0	0		footrot
1	11-9-F2	11	pre-treatment	2016-02-29	11	9	9F2	expt sheep	F2	Front right	front foot	right	foot	0	0	23.8027	2.57136	0	1	0	0	0	0	0	0	4	0	0	no disease		0		0			0		0	0	0	0	20513	0	0	1.3945	0.552833	0	0.944055	codd
1	38-2-F3	38	pre-treatment	2016-05-31	38	2	2F3	expt sheep	F3	Back left	back foot	left	foot	0	5481.48	0	0	0	1	0	1	0	0	0	0	3	3	0	no disease		1				0	0		0	0	0	0	20605	0	3.73898	0	0	0		footrot
1	11-9-F1	11	pre-treatment	2016-02-29	11	9	9F1	expt sheep	F1	Front left	front foot	left	foot	0	0	0	1.60732	3.83615	0	0	0	0	0	0	0	4	0	0	no disease		0	0				0		0	0	0	0	20513	0	0	0	0.416195	0.6845	0.258755	codd
1	1-15-F3	1	pre-treatment	2016-01-26	1	15	15F3	expt sheep	F3	Back left	back foot	left	foot	4.37732	0	0	0	14.4078	0	0	0	0	0	1	1	2	0	0	no disease		1				0	0		0	0	0	0	20479	0.730566	0	0	0	1.18774	0.681478	codd
0	17-13-F4	17	pre-treatment	2016-03-21		13	13F4	expt sheep	F4	Back right	back foot	right	foot	0	0	0	0	0	0	0	0	0	0	0	0			0	no disease					0		0		0	0	0	0		0	0	0	0	0		no disease
1	51-27-F2	51	post-treatment	2016-07-11	51	27	27F2	expt sheep	F2	Front right	front foot	right	foot	0	0	0	0	3.72938	0	0	0	0	0	0	0	3	1	0	no disease		0		0			0		0	0	0	0	20646	0	0	0	0	0.674804	0.0945153	no disease
1	47-11-F3	47	post-treatment	2016-06-27	47	11	11F3	expt sheep	F3	Back left	back foot	left	foot	0	0	0	0	0	0	0	0	0	0	0	0	2	0	0	no disease		1				0	0		0	0	0	0	20632	0	0	0	0	0		scald
1	9-15-F4	9	pre-treatment	2016-02-22		15	15F4	expt sheep	F4	Back right	back foot	right	foot	16.61	0	0	0	0	0	0	0	0	0	0	0			0	no disease					0		0		0	0	0	0		1.24576	0	0	0	0		footrot
1	51-20-F4	51	post-treatment	2016-07-11	51	20	20F4	expt sheep	F4	Back right	back foot	right	foot	0	0	0	0	0	0	0	0	0	0	0	0	3	0	0	no disease		0			0		0		0	0	0	0	20646	0	0	0	0	0		no disease
1	33-2-F1	33	pre-treatment	2016-05-16	33	2	2F1	expt sheep	F1	Front left	front foot	left	foot	69170.8	136346	0	0	0	1	1	1	0	0	0	0	3	3	scald	ID		1	0				0		1	0	0	0	20590	4.83993	5.13464	0	0	0		footrot
1	27-22-F3	27	pre-treatment	2016-04-25	27	22	22F3	expt sheep	F3	Back left	back foot	left	foot	0	0	0	0	3.96827	0	0	0	0	0	0	0	4	0	0	no disease		0				0	0		0	0	0	0	20569	0	0	0	0	0.696205	0.12148	scald
1	33-23-F4	33	pre-treatment	2016-05-16	33	23	23F4	expt sheep	F4	Back right	back foot	right	foot	57916.7	0	503537	28451.4	24712.1	1	1	0	1	1	1	1	2	3	fr&CODD	CODD	CODD & footrot	1			2		2	codd1-4	0	0	1	0	20590	4.76281	0	5.70203	4.45412	4.39293	5.2685	codd
1	21-21-F1	21	pre-treatment	2016-04-04	21	21	21F1	expt sheep	F1	Front left	front foot	left	foot	0	173.123	0	0	0	1	0	1	0	0	0	0	4	0	0	no disease		1	0				0		0	0	0	0	20548	0	2.24086	0	0	0		no disease
1	13-27-F3	13	pre-treatment	2016-03-07	13	27	27F3	expt sheep	F3	Back left	back foot	left	foot	159.524	0	176.845	5.31329	23.8016	1	1	0	1	0	1	1	3	0	0	no disease		1				0	0		0	0	0	0	20520	2.20554	0	2.25004	0.800256	1.39448	1.83666	no disease
1	47-10-F2	47	post-treatment	2016-06-27	47	10	10F2	expt sheep	F2	Front right	front foot	right	foot	0	0	0	0	0	0	0	0	0	0	0	0	3	0	0	no disease		1		0			0		0	0	0	0	20632	0	0	0	0	0		footrot
1	43-30-F2	43	post-treatment	2016-06-13	43	30	30F2	expt sheep	F2	Front right	front foot	right	foot	13.9382	0	0	0	0	0	0	0	0	0	0	0	2	1	0	no disease		1		0			0		0	0	0	0	20618	1.1743	0	0	0	0		scald
1	38-13-F4	38	pre-treatment	2016-05-31	38	13	13F4	expt sheep	F4	Back right	back foot	right	foot	0	0	0	28.9581	0	1	0	0	0	1	0	1	3	0	0	no disease		1			0		0		0	0	0	0	20605	0	0	0	1.47651	0	0.984648	no disease
1	25-25-F3	25	pre-treatment	2016-04-18	25	25	25F3	expt sheep	F3	Back left	back foot	left	foot	0	0	0	9.08228	0	0	0	0	0	0	0	0	3	0	0	no disease		1				0	0		0	0	0	0	20562	0	0	0	1.00356	0	0.481074	no disease
1	15-8-F2	15	pre-treatment	2016-03-14	15	8	8F2	expt sheep	F2	Front right	front foot	right	foot	0	0	0	0	0	0	0	0	0	0	0	0	3	0	0	no disease		0		0			0		0	0	0	0	20527	0	0	0	0	0		no disease
1	27-4-F3	27	pre-treatment	2016-04-25	27	4	4F3	expt sheep	F3	Back left	back foot	left	foot	0	0	32.1302	14.2061	0	1	0	0	0	0	0	0	3	0	0	no disease		0				0	0		0	0	0	0	20569	0	0	1.52022	1.18202	0	1.1888	no disease
1	9-13-F4	9	pre-treatment	2016-02-22		13	13F4	expt sheep	F4	Back right	back foot	right	foot	14.4805	0	0	0	0	0	0	0	0	0	0	0			0	no disease					0		0		0	0	0	0		1.18979	0	0	0	0		no disease
1	21-17-F3	21	pre-treatment	2016-04-04	21	17	17F3	expt sheep	F3	Back left	back foot	left	foot	0	79.3282	14.6144	0	0	1	0	1	0	0	0	0	4	0	0	no disease		1				0	0		0	0	0	0	20548	0	1.90487	1.19352	0	0	0.687659	scald
1	23-23-F3	23	pre-treatment	2016-04-11	23	23	23F3	expt sheep	F3	Back left	back foot	left	foot	28650.3	0	3433.52	0	993.299	1	1	0	1	0	1	1	2	3	scald	ID		0				0	0		1	0	0	0	20555	4.45714	0	3.53587	0	2.99752	3.16897	codd
1	25-17-F1	25	pre-treatment	2016-04-18	25	17	17F1	expt sheep	F1	Front left	front foot	left	foot	0	0	0	0	0	0	0	0	0	0	0	0	3	0	0	no disease		1	0				0		0	0	0	0	20562	0	0	0	0	0		no disease
1	5-25-F3	5	pre-treatment	2016-02-08	5	25	25F3	expt sheep	F3	Back left	back foot	left	foot	10.5894	0	0	0	6.96601	0	0	0	0	0	0	0	3	0	0	no disease		1				0	0		0	0	0	0	20492	1.06406	0	0	0	0.901241	0.365863	no disease
1	17-4-F3	17	pre-treatment	2016-03-21	17	4	4F3	expt sheep	F3	Back left	back foot	left	foot	0	0	0	0	0	0	0	0	0	0	0	0	3	0	0	no disease		1				0	0		0	0	0	0	20534	0	0	0	0	0		no disease
0	35-4-F4	35	pre-treatment	2016-05-23	35	4	4F4	expt sheep	F4	Back right	back foot	right	foot	39.295	0	0	24.5942	0	1	0	0	0	0	0	0	2	3	0	no disease		0			0		0		0	0	0	0	20597	1.60525	0	0	1.40814	0	0.913711	no disease
1	25-21-F3	25	pre-treatment	2016-04-18	25	21	21F3	expt sheep	F3	Back left	back foot	left	foot	0	0	0	0	0	0	0	0	0	0	0	0	4	0	0	no disease		1				0	0		0	0	0	0	20562	0	0	0	0	0		no disease
1	38-25-F4	38	pre-treatment	2016-05-31	38	25	25F4	expt sheep	F4	Back right	back foot	right	foot	69.9905	0	0	3.27742	0	1	1	0	0	0	0	0	3	0	0	no disease		1			0		0		0	0	0	0	20605	1.8512	0	0	0.631182	0	0.0384109	no disease
1	33-9-F3	33	pre-treatment	2016-05-16	33	9	9F3	expt sheep	F3	Back left	back foot	left	foot	0	0	351.736	0	0	1	0	0	1	0	0	1	3	2	0	no disease		1				0	0		0	0	0	0	20590	0	0	2.54745	0	0	2.0691	no disease
1	43-10-F2	43	post-treatment	2016-06-13	43	10	10F2	expt sheep	F2	Front right	front foot	right	foot	0	0	0	0	5.61526	0	0	0	0	0	0	0	2	3	0	no disease		1		0			0		0	0	0	0	20618	0	0	0	0	0.820547	0.272249	footrot
1	33-6-F3	33	pre-treatment	2016-05-16	33	6	6F3	expt sheep	F3	Back left	back foot	left	foot	0	0	0	0	0	0	0	0	0	0	0	0	3	3	0	no disease		1				0	0		0	0	0	0	20590	0	0	0	0	0		no disease
1	25-22-F4	25	pre-treatment	2016-04-18	25	22	22F4	expt sheep	F4	Back right	back foot	right	foot	18.5357	0	22.396	0	23.6395	1	0	0	0	0	1	1	4	0	0	no disease		1			0		0		0	0	0	0	20562	1.29083	0	1.36914	0	1.39163	1.18597	no disease
1	17-3-F4	17	pre-treatment	2016-03-21		3	3F4	expt sheep	F4	Back right	back foot	right	foot	0	0	0	0	0	0	0	0	0	0	0	0			0	no disease					0		0		0	0	0	0		0	0	0	0	0		no disease
1	17-4-F1	17	pre-treatment	2016-03-21	17	4	4F1	expt sheep	F1	Front left	front foot	left	foot	49.2192	0	0	0	21.6482	1	1	0	0	0	1	1	3	0	0	no disease		1	0				0		0	0	0	0	20534	1.70087	0	0	0	1.35503	0.858301	codd
0	3-34-F1	3	pre-treatment	2016-02-02	3	34	34F1	source sheep	F1	Front left	front foot	left	foot	0	0	36.1714	0	16.0583	1	0	0	1	0	1	1	2	3	0	no disease		1	0				0		0	0	0	0	20486	0	0	1.57021	0	1.23194	1.2408
1	17-7-F3	17	pre-treatment	2016-03-21	17	7	7F3	expt sheep	F3	Back left	back foot	left	foot	0	0	0	0	0	0	0	0	0	0	0	0	3	0	0	no disease		1				0	0		0	0	0	0	20534	0	0	0	0	0		scald
1	38-12-F1	38	pre-treatment	2016-05-31	38	12	12F1	expt sheep	F1	Front left	front foot	left	foot	0	0	0	0	0	0	0	0	0	0	0	0	2	3	0	no disease		1	0				0		0	0	0	0	20605	0	0	0	0	0		no disease
1	31-22-F2	31	pre-treatment	2016-05-09	31	22	22F2	expt sheep	F2	Front right	front foot	right	foot	0	0	0	0	0	0	0	0	0	0	0	0	3	0	0	no disease		0		0			0		0	0	0	0	20583	0	0	0	0	0		no disease
1	19-20-F3	19	pre-treatment	2016-03-28	19	20	20F3	expt sheep	F3	Back left	back foot	left	foot	4.73865	0	0	0	0	0	0	0	0	0	0	0	3	0	0	no disease		0				0	0		0	0	0	0	20541	0.75881	0	0	0	0		no disease
1	11-22-F3	11	pre-treatment	2016-02-29	11	22	22F3	expt sheep	F3	Back left	back foot	left	foot	0	0	0	0	7.9604	0	0	0	0	0	0	0	4	0	0	no disease		0				0	0		0	0	0	0	20513	0	0	0	0	0.952328	0.423814	scald
1	25-8-F1	25	pre-treatment	2016-04-18	25	8	8F1	expt sheep	F1	Front left	front foot	left	foot	36.5988	1203.03	0	0	0	1	0	1	0	0	0	0	3	2	0	no disease		1	0				0		0	0	0	0	20562	1.57517	3.08064	0	0	0		no disease
1	19-25-F4	19	pre-treatment	2016-03-28	19	25	25F4	expt sheep	F4	Back right	back foot	right	foot	0	0	0	0	0	0	0	0	0	0	0	0	4	0	0	no disease		0			0		0		0	0	0	0	20541	0	0	0	0	0		no disease
1	11-3-F2	11	pre-treatment	2016-02-29	11	3	3F2	expt sheep	F2	Front right	front foot	right	foot	0	0	0	0	0	0	0	0	0	0	0	0	4	0	0	no disease		0		0			0		0	0	0	0	20513	0	0	0	0	0		codd
1	38-17-F1	38	pre-treatment	2016-05-31	38	17	17F1	expt sheep	F1	Front left	front foot	left	foot	40.762	0	0	3.14371	0	1	0	0	0	0	0	0	3	0	0	no disease		1	0				0		0	0	0	0	20605	1.62078	0	0	0.61739	0	0.0203218	no disease
1	25-13-F3	25	pre-treatment	2016-04-18	25	13	13F3	expt sheep	F3	Back left	back foot	left	foot	17.6169	0	15.9009	0	0	0	0	0	0	0	0	0	3	0	0	no disease		1				0	0		0	0	0	0	20562	1.26991	0	1.22791	0	0	0.724302	no disease
1	9-20-F3	9	pre-treatment	2016-02-22	9	20	20F3	expt sheep	F3	Back left	back foot	left	foot	15.2737	0	0	0	6.76861	0	0	0	0	0	0	0	3	0	0	no disease		1					0		0	0	0	0	20506	1.21149	0	0	0	0.890343	0.353378	no disease
1	21-9-F3	21	pre-treatment	2016-04-04	21	9	9F3	expt sheep	F3	Back left	back foot	left	foot	0	0	0	0	0	0	0	0	0	0	0	0	3	0	0	no disease		1				0	0		0	0	0	0	20548	0	0	0	0	0		no disease
1	9-21-F2	9	pre-treatment	2016-02-22	9	21	21F2	expt sheep	F2	Front right	front foot	right	foot	0	0	0	0	18.9452	0	0	0	0	0	1	1	4	0	0	no disease		1					0		0	0	0	0	20506	0	0	0	0	1.29984	0.800377	no disease
1	23-7-F4	23	pre-treatment	2016-04-11	23	7	7F4	expt sheep	F4	Back right	back foot	right	foot	0	0	0	0	0	0	0	0	0	0	0	0	3	2	0	no disease		0			0		0		0	0	0	0	20555	0	0	0	0	0		scald
1	41-4-F3	41	pre-treatment	2016-06-06	41	4	4F3	expt sheep	F3	Back left	back foot	left	foot	0	0	0	1.5261	4.57476	0	0	0	0	0	0	0	3	3	0	no disease		0				0	0		0	0	0	0	20611	0	0	0	0.40245	0.746226	0.308269	no disease
1	31-13-F4	31	pre-treatment	2016-05-09	31	13	13F4	expt sheep	F4	Back right	back foot	right	foot	0	0	0	0	0	0	0	0	0	0	0	0	3	0	0	no disease		0			0		0		0	0	0	0	20583	0	0	0	0	0		no disease
0	29-4-F3	29	pre-treatment	2016-05-03	29	4	4F3	expt sheep	F3	Back left	back foot	left	foot	0	0	0	0	0	0	0	0	0	0	0	0	3	0	0	no disease		1				0	0		0	0	0	0	20577	0	0	0	0	0		no disease
1	5-25-F4	5	pre-treatment	2016-02-08	5	25	25F4	expt sheep	F4	Back right	back foot	right	foot	0	0	0	0	6.44602	0	0	0	0	0	0	0	3	0	0	no disease		1			0		0		0	0	0	0	20492	0	0	0	0	0.871924	0.33217	no disease
1	19-9-F1	19	pre-treatment	2016-03-28	19	9	9F1	expt sheep	F1	Front left	front foot	left	foot	0	0	0	0	0	0	0	0	0	0	0	0	3	0	0	no disease		0	0				0		0	0	0	0	20541	0	0	0	0	0		codd
1	7-27-F1	7	pre-treatment	2016-02-15	7	27	27F1	expt sheep	F1	Front left	front foot	left	foot	0	0	0	0	3.09084	0	0	0	0	0	0	0	4	0	0	no disease		0	0				0		0	0	0	0	20499	0	0	0	0	0.611812	0.0129552	no disease
0	1-29-F1	1	pre-treatment	2016-01-26	1	29	29F1	expt sheep	F1	Front left	front foot	left	foot	0	0	0	0	0	0	0	0	0	0	0	0	3	0	0	no disease		1	0				0		0	0	0	0	20479	0	0	0	0	0		footrot
1	33-28-F2	33	pre-treatment	2016-05-16	33	28	28F2	expt sheep	F2	Front right	front foot	right	foot	9.7132	0	0	0	0	0	0	0	0	0	0	0	3	0	0	no disease		1		0			0		0	0	0	0	20590	1.02992	0	0	0	0		footrot
1	33-22-F1	33	pre-treatment	2016-05-16	33	22	22F1	expt sheep	F1	Front left	front foot	left	foot	0	0	0	0	0	0	0	0	0	0	0	0	3	0	0	no disease		1	0				0		0	0	0	0	20590	0	0	0	0	0		scald
1	21-1-F1	21	pre-treatment	2016-04-04	21	1	1F1	expt sheep	F1	Front left	front foot	left	foot	0	0	0	0	3.71912	0	0	0	0	0	0	0	3	0	0	no disease		1	0				0		0	0	0	0	20548	0	0	0	0	0.673861	0.0933186	no disease
1	31-20-F3	31	pre-treatment	2016-05-09	31	20	20F3	expt sheep	F3	Back left	back foot	left	foot	0	0	0	0	0	0	0	0	0	0	0	0	3	0	0	no disease		0				0	0		0	0	0	0	20583	0	0	0	0	0		no disease
1	9-18-F4	9	pre-treatment	2016-02-22		18	18F4	expt sheep	F4	Back right	back foot	right	foot	10.2958	0	0	44.859	13.2954	1	0	0	0	1	1	1			0	no disease					0		0		0	0	0	0		1.05292	0	0	1.66142	1.1552	1.28746	no disease
1	25-15-F2	25	pre-treatment	2016-04-18	25	15	15F2	expt sheep	F2	Front right	front foot	right	foot	16495	363326	9509.42	0	16095.5	1	1	1	1	0	1	1	2	3	fr&CODD	CODD	CODD & footrot	1		1			1	codd1-4	0	0	1	0	20562	4.21738	5.5603	3.9782	0	4.20673	3.9312	codd
1	41-17-F1	41	pre-treatment	2016-06-06	41	17	17F1	expt sheep	F1	Front left	front foot	left	foot	0	0	0	0	0	0	0	0	0	0	0	0	3	1	0	no disease		0	0				0		0	0	0	0	20611	0	0	0	0	0		no disease
0	1-3-F1	1	pre-treatment	2016-01-26	1	3	3F1	expt sheep	F1	Front left	front foot	left	foot	0	0	0	0	0	0	0	0	0	0	0	0	3	0	0	no disease		1	0				0		0	0	0	0	20479	0	0	0	0	0		codd
1	41-28-F1	41	pre-treatment	2016-06-06	41	28	28F1	expt sheep	F1	Front left	front foot	left	foot	0	0	13.9781	5.00088	0	0	0	0	0	0	0	0	3	2	0	no disease		0	0				0		0	0	0	0	20611	0	0	1.17546	0.778215	0	0.801151	no disease
1	29-20-F1	29	pre-treatment	2016-05-03	29	20	20F1	expt sheep	F1	Front left	front foot	left	foot	0	0	21.9268	0	0	1	0	0	0	0	0	0	2	0	0	no disease		1	0				0		0	0	0	0	20577	0	0	1.36034	0	0	0.863855	no disease
1	27-5-F4	27	pre-treatment	2016-04-25	27	5	5F4	expt sheep	F4	Back right	back foot	right	foot	60.0664	3472.88	0	0	17.7225	1	1	1	0	0	1	1	3	1	0	no disease		0			0		0		0	0	0	0	20569	1.7858	3.54081	0	0	1.27236	0.771404	codd
1	23-28-F4	23	pre-treatment	2016-04-11	23	28	28F4	expt sheep	F4	Back right	back foot	right	foot	0	0	0	0	0	0	0	0	0	0	0	0	3	0	0	no disease		0			0		0		0	0	0	0	20555	0	0	0	0	0		scald
0	1-27-F2	1	pre-treatment	2016-01-26	1	27	27F2	expt sheep	F2	Front right	front foot	right	foot	0	0	0	0	3.43493	0	0	0	0	0	0	0	3	0	0	no disease		1		0			0		0	0	0	0	20479	0	0	0	0	0.646887	0.0587964	no disease
1	29-17-F3	29	pre-treatment	2016-05-03	29	17	17F3	expt sheep	F3	Back left	back foot	left	foot	35.8299	0	73.6228	5.34642	7.15109	1	0	0	1	0	0	1	3	0	0	no disease		1				0	0		0	0	0	0	20577	1.5662	0	1.87287	0.802529	0.911216	1.45798	scald
0	35-20-F2	35	pre-treatment	2016-05-23	35	20	20F2	expt sheep	F2	Front right	front foot	right	foot	0	0	0	0	0	0	0	0	0	0	0	0	2	0	0	no disease		0		0			0		0	0	0	0	20597	0	0	0	0	0		no disease
1	43-28-F3	43	post-treatment	2016-06-13	43	28	28F3	expt sheep	F3	Back left	back foot	left	foot	17.7549	0	60.139	5.28708	2.13557	1	0	0	1	0	0	1	3	3	0	no disease		1				0	0		0	0	0	0	20618	1.27311	0	1.78632	0.798449	0.496317	1.35258	no disease
1	7-7-F2	7	pre-treatment	2016-02-15	7	7	7F2	expt sheep	F2	Front right	front foot	right	foot	0	0	0	9.04412	15.6616	0	0	0	0	0	1	1	3	0	0	no disease		0		0			0		0	0	0	0	20499	0	0	0	1.00191	1.22172	0.915676	codd
1	23-6-F4	23	pre-treatment	2016-04-11	23	6	6F4	expt sheep	F4	Back right	back foot	right	foot	0	0	0	0	0	0	0	0	0	0	0	0	3	0	overgrown	other		0			0		0		0	0	0	1	20555	0	0	0	0	0		no disease
1	43-16-F4	43	post-treatment	2016-06-13	43	16	16F4	expt sheep	F4	Back right	back foot	right	foot	0	0	0	25.7751	8.20752	1	0	0	0	0	0	0	3	0	0	no disease		1			0		0		0	0	0	0	20618	0	0	0	1.42773	0.964142	1.05414	no disease
1	9-20-F4	9	pre-treatment	2016-02-22		20	20F4	expt sheep	F4	Back right	back foot	right	foot	0	0	0	13.0425	0	0	0	0	0	0	0	0			0	no disease					0		0		0	0	0	0		0	0	0	1.14744	0	0.638239	no disease
1	15-6-F1	15	pre-treatment	2016-03-14	15	6	6F1	expt sheep	F1	Front left	front foot	left	foot	71.148	0	0	0	0	1	1	0	0	0	0	0	3	0	0	no disease		0	0				0		0	0	0	0	20527	1.85822	0	0	0	0		codd
1	47-28-F1	47	post-treatment	2016-06-27	47	28	28F1	expt sheep	F1	Front left	front foot	left	foot	49.5275	0	0	0	0	1	1	0	0	0	0	0	3	0	0	no disease		1	0				0		0	0	0	0	20632	1.70353	0	0	0	0		no disease
1	7-7-F4	7	pre-treatment	2016-02-15		7	7F4	expt sheep	F4	Back right	back foot	right	foot	0	0	0	0	92.2411	1	0	0	0	0	1	1			0	no disease					0		0		0	0	0	0		0	0	0	0	1.96961	1.4878	scald
1	23-13-F4	23	pre-treatment	2016-04-11	23	13	13F4	expt sheep	F4	Back right	back foot	right	foot	0	0	0	0	0	0	0	0	0	0	0	0	3	0	0	no disease		0			0		0		0	0	0	0	20555	0	0	0	0	0		no disease
1	5-18-F4	5	pre-treatment	2016-02-08	5	18	18F4	expt sheep	F4	Back right	back foot	right	foot	0	0	0	0	0	0	0	0	0	0	0	0	3	0	0	no disease		1			0		0		0	0	0	0	20492	0	0	0	0	0		no disease
1	51-4-F2	51	post-treatment	2016-07-11		4	4F2	expt sheep	F2	Front right	front foot	right	foot	0	0	0	0	0	0	0	0	0	0	0	0			0	no disease				0			0		0	0	0	0		0	0	0	0	0		scald
1	38-8-F2	38	pre-treatment	2016-05-31	38	8	8F2	expt sheep	F2	Front right	front foot	right	foot	0	0	0	27.0399	0	1	0	0	0	1	0	1	2	3	0	no disease		1		0			0		0	0	0	0	20605	0	0	0	1.44778	0	0.954883	no disease
1	33-5-F3	33	pre-treatment	2016-05-16	33	5	5F3	expt sheep	F3	Back left	back foot	left	foot	0	0	0	0	0	0	0	0	0	0	0	0	2	3	0	no disease		1				0	0		0	0	0	0	20590	0	0	0	0	0		codd
1	43-24-F3	43	post-treatment	2016-06-13	43	24	24F3	expt sheep	F3	Back left	back foot	left	foot	0	0	0	0	0	0	0	0	0	0	0	0	3	0	0	no disease		1				0	0		0	0	0	0	20618	0	0	0	0	0		no disease
1	31-22-F1	31	pre-treatment	2016-05-09	31	22	22F1	expt sheep	F1	Front left	front foot	left	foot	0	0	0	0	0	0	0	0	0	0	0	0	3	0	0	no disease		0	0				0		0	0	0	0	20583	0	0	0	0	0		scald
0	1-7-F2	1	pre-treatment	2016-01-26	1	7	7F2	expt sheep	F2	Front right	front foot	right	foot	0	0	0	0	6.13953	0	0	0	0	0	0	0	3	0	0	no disease		1		0			0		0	0	0	0	20479	0	0	0	0	0.85367	0.311014	codd
1	51-20-F2	51	post-treatment	2016-07-11	51	20	20F2	expt sheep	F2	Front right	front foot	right	foot	0	0	0	0	7.42475	0	0	0	0	0	0	0	3	0	0	no disease		0		0			0		0	0	0	0	20646	0	0	0	0	0.925557	0.393561	no disease
1	9-16-F4	9	pre-treatment	2016-02-22		16	16F4	expt sheep	F4	Back right	back foot	right	foot	18.9963	0	0	13.3025	8.10167	0	0	0	0	0	0	0			0	no disease					0		0		0	0	0	0		1.30095	0	0	1.15541	0.959121	0.853377	no disease
1	19-25-F3	19	pre-treatment	2016-03-28	19	25	25F3	expt sheep	F3	Back left	back foot	left	foot	10.1933	0	23.3609	0	0	1	0	0	0	0	0	0	4	0	0	no disease		0				0	0		0	0	0	0	20541	1.04896	0	1.38669	0	0	0.891368	no disease
1	27-13-F3	27	pre-treatment	2016-04-25	27	13	13F3	expt sheep	F3	Back left	back foot	left	foot	22.7626	0	0	3.89416	3.76065	1	0	0	0	0	0	0	3	0	0	no disease		0				0	0		0	0	0	0	20569	1.37589	0	0	0.689678	0.677666	0.406813	no disease
0	29-5-F1	29	pre-treatment	2016-05-03	29	5	5F1	expt sheep	F1	Front left	front foot	left	foot	0	261.326	0	0	0	1	0	1	0	0	0	0	3	3	0	no disease		1	0				0		0	0	0	0	20577	0	2.41884	0	0	0		codd
1	33-46-F3	33	pre-treatment	2016-05-16	33	46	46F3	source sheep	F3	Back left	back foot	left	foot	0	164.024	0	0	0	1	0	1	0	0	0	0	2	3	0	no disease		1				0	0		0	0	0	0	20590	0	2.21755	0	0	0
1	38-25-F3	38	pre-treatment	2016-05-31	38	25	25F3	expt sheep	F3	Back left	back foot	left	foot	6.30255	0	14.0277	1.6153	12.9452	0	0	0	0	0	1	1	3	0	0	no disease		1				0	0		0	0	0	0	20605	0.863474	0	1.17689	0.417522	1.14443	0.979066	no disease
1	19-26-F1	19	pre-treatment	2016-03-28	19	26	26F1	expt sheep	F1	Front left	front foot	left	foot	0	0	0	0	8.30208	0	0	0	0	0	0	0	4	0	0	no disease		0	0				0		0	0	0	0	20541	0	0	0	0	0.96858	0.442066	codd
1	35-14-F2	35	pre-treatment	2016-05-23	35	14	14F2	expt sheep	F2	Front right	front foot	right	foot	0	0	0	0	0	0	0	0	0	0	0	0	1	3	0	no disease		0		0			0		0	0	0	0	20597	0	0	0	0	0		scald
1	43-15-F4	43	post-treatment	2016-06-13	43	15	15F4	expt sheep	F4	Back right	back foot	right	foot	24.9876	55.4793	38.998	14.9306	15.7606	1	0	0	1	0	1	1	2	3	0	no disease		1			0		0		0	0	0	0	20618	1.41477	1.75189	1.60204	1.20223	1.22429	1.36604	footrot
1	33-22-F3	33	pre-treatment	2016-05-16	33	22	22F3	expt sheep	F3	Back left	back foot	left	foot	0	0	0	0	0	0	0	0	0	0	0	0	3	0	0	no disease		1				0	0		0	0	0	0	20590	0	0	0	0	0		scald
0	17-12-F3	17	pre-treatment	2016-03-21	17	12	12F3	expt sheep	F3	Back left	back foot	left	foot	0	0	0	0	0	0	0	0	0	0	0	0	2	0	0	no disease		1				0	0		0	0	0	0	20534	0	0	0	0	0		codd
1	47-17-F3	47	post-treatment	2016-06-27	47	17	17F3	expt sheep	F3	Back left	back foot	left	foot	109.333	0	0	0	4.30318	1	1	0	0	0	0	0	2	2	0	no disease		1				0	0		0	0	0	0	20632	2.04271	0	0	0	0.724536	0.156668	scald
1	1-1-F1	1	pre-treatment	2016-01-26	1	1	1F1	expt sheep	F1	Front left	front foot	left	foot	48.9097	684.511	0	0	8.60383	1	1	1	0	0	0	0	2	0	0	no disease		1	0				0		0	0	0	0	20479	1.69818	2.83601	0	0	0.982444	0.45757	no disease
1	31-10-F1	31	pre-treatment	2016-05-09	31	10	10F1	expt sheep	F1	Front left	front foot	left	foot	17.9409	0	0	2.48811	0	0	0	0	0	0	0	0	3	0	0	no disease		0	0				0		0	0	0	0	20583	1.2774	0	0	0.54259	0	-0.0812517	no disease
1	23-10-F1	23	pre-treatment	2016-04-11	23	10	10F1	expt sheep	F1	Front left	front foot	left	foot	0	0	0	0	0	0	0	0	0	0	0	0	3	0	0	no disease		0	0				0		0	0	0	0	20555	0	0	0	0	0		no disease
1	35-12-F3	35	pre-treatment	2016-05-23	35	12	12F3	expt sheep	F3	Back left	back foot	left	foot	1950.4	10646.7	5858.71	2382.36	570.701	1	1	1	1	1	1	1	2	3	fr&CODD	CODD	CODD & footrot	0				1	1	codd1-4	0	0	1	0	20597	3.29035	4.02726	3.76788	3.37719	2.75717	3.46794	codd
1	1-2-F4	1	pre-treatment	2016-01-26	1	2	2F4	expt sheep	F4	Back right	back foot	right	foot	5.90233	22.5393	0	0	0	1	0	0	0	0	0	0	3	0	0	no disease		1			0		0		0	0	0	0	20479	0.838996	1.37179	0	0	0		footrot
1	13-12-F3	13	pre-treatment	2016-03-07	13	12	12F3	expt sheep	F3	Back left	back foot	left	foot	11.0182	0	0	0	4.59386	0	0	0	0	0	0	0	3	0	0	no disease		1				0	0		0	0	0	0	20520	1.07984	0	0	0	0.747712	0.185057	codd
1	19-14-F1	19	pre-treatment	2016-03-28	19	14	14F1	expt sheep	F1	Front left	front foot	left	foot	0	0	0	0	0	0	0	0	0	0	0	0	3	0	0	no disease		0	0				0		0	0	0	0	20541	0	0	0	0	0		scald
1	11-6-F4	11	pre-treatment	2016-02-29	11	6	6F4	expt sheep	F4	Back right	back foot	right	foot	19.6345	0	0	1.66253	3.13384	0	0	0	0	0	0	0	4	0	0	no disease		0			0		0		0	0	0	0	20513	1.31459	0	0	0.425295	0.616354	0.203792	no disease
1	27-25-F4	27	pre-treatment	2016-04-25	27	25	25F4	expt sheep	F4	Back right	back foot	right	foot	128.479	0	48.0945	0.770635	9.96135	1	1	0	1	0	0	1	3	0	0	no disease		0			0		0		0	0	0	0	20569	2.1122	0	1.69103	0.248129	1.03986	1.29245	no disease
1	51-8-F3	51	post-treatment	2016-07-11	51	8	8F3	expt sheep	F3	Back left	back foot	left	foot	0	2906.46	0	0	122.498	1	0	1	0	0	1	1	3	0	CODD	CODD	CODD only	0				5	5	codd5	0	0	1	0	20646	0	3.46351	0	0	2.09166	1.61101	codd
1	25-20-F4	25	pre-treatment	2016-04-18	25	20	20F4	expt sheep	F4	Back right	back foot	right	foot	0	0	0	0	0	0	0	0	0	0	0	0	3	0	0	no disease		1			0		0		0	0	0	0	20562	0	0	0	0	0		no disease
0	17-13-F1	17	pre-treatment	2016-03-21	17	13	13F1	expt sheep	F1	Front left	front foot	left	foot	0	0	0	0	0	0	0	0	0	0	0	0	3	0	0	no disease		1	0				0		0	0	0	0	20534	0	0	0	0	0		no disease
1	1-9-F1	1	pre-treatment	2016-01-26	1	9	9F1	expt sheep	F1	Front left	front foot	left	foot	6.03471	0	23.6943	0	0	1	0	0	0	0	0	0	3	0	0	no disease		1	0				0		0	0	0	0	20479	0.847246	0	1.3926	0	0	0.897522	codd
1	51-25-F2	51	post-treatment	2016-07-11	51	25	25F2	expt sheep	F2	Front right	front foot	right	foot	0	0	0	0	23.6	1	0	0	0	0	1	1	3	0	0	no disease		0		0			0		0	0	0	0	20646	0	0	0	0	1.39093	0.89579	no disease
1	13-16-F1	13	pre-treatment	2016-03-07	13	16	16F1	expt sheep	F1	Front left	front foot	left	foot	18.5677	0	0	0	5.66458	0	0	0	0	0	0	0	3	0	0	no disease		1	0				0		0	0	0	0	20520	1.29154	0	0	0	0.823773	0.276046	no disease
1	17-25-F1	17	pre-treatment	2016-03-21	17	25	25F1	expt sheep	F1	Front left	front foot	left	foot	0	0	0	0	4.2756	0	0	0	0	0	0	0	4	0	0	no disease		1	0				0		0	0	0	0	20534	0	0	0	0	0.722272	0.153875	no disease
1	11-13-F3	11	pre-treatment	2016-02-29	11	13	13F3	expt sheep	F3	Back left	back foot	left	foot	19.0098	0	18.9141	0	0	0	0	0	0	0	0	0	3	0	0	no disease		0				0	0		0	0	0	0	20513	1.30124	0	1.29916	0	0	0.799665	no disease
1	33-8-F1	33	pre-treatment	2016-05-16	33	8	8F1	expt sheep	F1	Front left	front foot	left	foot	0	0	0	0	0	0	0	0	0	0	0	0	2	3	0	no disease		1	0				0		0	0	0	0	20590	0	0	0	0	0		no disease
0	3-32-F4	3	pre-treatment	2016-02-02	3	32	32F4	source sheep	F4	Back right	back foot	right	foot	0	0	0	0	6.33022	0	0	0	0	0	0	0	2	3	0	no disease		1			0		0		0	0	0	0	20486	0	0	0	0	0.865117	0.324298
1	38-17-F2	38	pre-treatment	2016-05-31	38	17	17F2	expt sheep	F2	Front right	front foot	right	foot	11031	0	5949.7	2432.01	859.449	1	1	0	1	1	1	1	3	0	0	no disease		1		0			0		0	0	0	0	20605	4.04266	0	3.77457	3.38614	2.93473	3.48861	codd
1	19-28-F2	19	pre-treatment	2016-03-28	19	28	28F2	expt sheep	F2	Front right	front foot	right	foot	0	0	0	0	2.17489	0	0	0	0	0	0	0	4	0	0	no disease		0		0			0		0	0	0	0	20541	0	0	0	0	0.501729	-0.139684	footrot
1	7-5-F4	7	pre-treatment	2016-02-15		5	5F4	expt sheep	F4	Back right	back foot	right	foot	0	0	0	0	0	0	0	0	0	0	0	0			0	no disease					0		0		0	0	0	0		0	0	0	0	0		codd
1	11-25-F1	11	pre-treatment	2016-02-29	11	25	25F1	expt sheep	F1	Front left	front foot	left	foot	0	0	0	0	0	0	0	0	0	0	0	0	3	0	0	no disease		0	0				0		0	0	0	0	20513	0	0	0	0	0		no disease
1	41-24-F3	41	pre-treatment	2016-06-06	41	24	24F3	expt sheep	F3	Back left	back foot	left	foot	0	0	0	0	0	0	0	0	0	0	0	0	3	0	0	no disease		0				0	0		0	0	0	0	20611	0	0	0	0	0		no disease
0	1-21-F2	1	pre-treatment	2016-01-26	1	21	21F2	expt sheep	F2	Front right	front foot	right	foot	0	0	0	0	0	0	0	0	0	0	0	0	3	0	0	no disease		1		0			0		0	0	0	0	20479	0	0	0	0	0		no disease
1	27-24-F1	27	pre-treatment	2016-04-25	27	24	24F1	expt sheep	F1	Front left	front foot	left	foot	0	0	0	0	0	0	0	0	0	0	0	0	4	0	0	no disease		0	0				0		0	0	0	0	20569	0	0	0	0	0		no disease
1	33-10-F3	33	pre-treatment	2016-05-16	33	10	10F3	expt sheep	F3	Back left	back foot	left	foot	0	0	0	0	6.8706	0	0	0	0	0	0	0	3	0	0	no disease		1				0	0		0	0	0	0	20590	0	0	0	0	0.896008	0.359873	no disease
0	1-30-F2	1	pre-treatment	2016-01-26	1	30	30F2	expt sheep	F2	Front right	front foot	right	foot	0	0	0	0	0	0	0	0	0	0	0	0	2	0	0	no disease		1		0			0		0	0	0	0	20479	0	0	0	0	0		scald
1	38-22-F2	38	pre-treatment	2016-05-31	38	22	22F2	expt sheep	F2	Front right	front foot	right	foot	0	0	0	0	0	0	0	0	0	0	0	0	3	0	0	no disease		1		0			0		0	0	0	0	20605	0	0	0	0	0		no disease
1	21-12-F1	21	pre-treatment	2016-04-04	21	12	12F1	expt sheep	F1	Front left	front foot	left	foot	0	107.478	0	0	24.7848	1	0	1	0	0	1	1	3	0	overgrown	other		1	0				0		0	0	0	1	20548	0	2.03534	0	0	1.41136	0.917065	no disease
1	19-10-F1	19	pre-treatment	2016-03-28	19	10	10F1	expt sheep	F1	Front left	front foot	left	foot	0	0	0	0	0	0	0	0	0	0	0	0	3	0	0	no disease		0	0				0		0	0	0	0	20541	0	0	0	0	0		no disease
1	21-14-F1	21	pre-treatment	2016-04-04	21	14	14F1	expt sheep	F1	Front left	front foot	left	foot	0	0	0	0	0	0	0	0	0	0	0	0	3	0	overgrown	other		1	0				0		0	0	0	1	20548	0	0	0	0	0		scald
1	33-3-F1	33	pre-treatment	2016-05-16	33	3	3F1	expt sheep	F1	Front left	front foot	left	foot	9826.12	1563.35	72916.4	604.851	20689.9	1	1	1	1	1	1	1	3	3	footrot	FR		1	0				0		0	1	0	0	20590	3.99243	3.19433	4.86283	2.78237	4.31578	4.49698	codd
1	23-8-F1	23	pre-treatment	2016-04-11	23	8	8F1	expt sheep	F1	Front left	front foot	left	foot	18.8489	0	0	1.14594	2.81836	0	0	0	0	0	0	0	3	0	0	no disease		0	0				0		0	0	0	0	20555	1.29774	0	0	0.331617	0.581877	0.121045	no disease
1	35-12-F4	35	pre-treatment	2016-05-23	35	12	12F4	expt sheep	F4	Back right	back foot	right	foot	23.7236	181.838	248.741	16.3563	31.024	1	0	1	1	0	1	1	2	3	0	no disease		0			0		0		0	0	0	0	20597	1.39311	2.26207	2.39749	1.23946	1.50548	1.99435	no disease
1	29-23-F2	29	pre-treatment	2016-05-03	29	23	23F2	expt sheep	F2	Front right	front foot	right	foot	0	0	0	0	0	0	0	0	0	0	0	0	2	3	0	no disease		1		0			0		0	0	0	0	20577	0	0	0	0	0		no disease
1	25-3-F2	25	pre-treatment	2016-04-18	25	3	3F2	expt sheep	F2	Front right	front foot	right	foot	0	1945.94	0	0	4.50485	1	0	1	0	0	0	0	3	1	0	no disease		1		0			0		0	0	0	0	20562	0	3.28935	0	0	0.740745	0.176559	codd
1	7-20-F2	7	pre-treatment	2016-02-15	7	20	20F2	expt sheep	F2	Front right	front foot	right	foot	0	0	0	0	0	0	0	0	0	0	0	0	4	0	0	no disease		0		0			0		0	0	0	0	20499	0	0	0	0	0		no disease
1	43-9-F4	43	post-treatment	2016-06-13	43	9	9F4	expt sheep	F4	Back right	back foot	right	foot	0	0	26.8253	16.3715	0	1	0	0	0	0	0	0	2	0	0	no disease		1			0		0		0	0	0	0	20618	0	0	1.44444	1.23984	0	1.15833	no disease
0	1-27-F1	1	pre-treatment	2016-01-26	1	27	27F1	expt sheep	F1	Front left	front foot	left	foot	0	0	0	0	0	0	0	0	0	0	0	0	3	0	0	no disease		1	0				0		0	0	0	0	20479	0	0	0	0	0		no disease
1	47-11-F4	47	post-treatment	2016-06-27	47	11	11F4	expt sheep	F4	Back right	back foot	right	foot	0	0	0	0	0	0	0	0	0	0	0	0	2	0	0	no disease		1			0		0		0	0	0	0	20632	0	0	0	0	0		no disease
1	51-10-F2	51	post-treatment	2016-07-11	51	10	10F2	expt sheep	F2	Front right	front foot	right	foot	0	0	0	0	0	0	0	0	0	0	0	0	2	0	0	no disease		0		0			0		0	0	0	0	20646	0	0	0	0	0		footrot
1	35-2-F4	35	pre-treatment	2016-05-23	35	2	2F4	expt sheep	F4	Back right	back foot	right	foot	84.653	17350.7	97.4792	2.7638	113.474	1	1	1	1	0	1	1	2	3	0	no disease		0			0		0		0	0	0	0	20597	1.93274	4.23934	1.99334	0.575626	2.05871	1.85272	footrot
1	27-25-F2	27	pre-treatment	2016-04-25	27	25	25F2	expt sheep	F2	Front right	front foot	right	foot	93.0536	0	0	0	7.24404	1	1	0	0	0	0	0	3	0	0	no disease		0		0			0		0	0	0	0	20569	1.97338	0	0	0	0.91614	0.382859	no disease
1	25-21-F1	25	pre-treatment	2016-04-18	25	21	21F1	expt sheep	F1	Front left	front foot	left	foot	0	0	0	0	4.0373	0	0	0	0	0	0	0	4	0	0	no disease		1	0				0		0	0	0	0	20562	0	0	0	0	0.702198	0.128969	no disease
1	38-17-F3	38	pre-treatment	2016-05-31	38	17	17F3	expt sheep	F3	Back left	back foot	left	foot	57.6648	53.5846	42.9169	4.88722	6.47632	1	1	0	1	0	0	1	3	0	0	no disease		1				0	0		0	0	0	0	20605	1.76838	1.73707	1.64263	0.76991	0.873688	1.25752	scald
1	51-17-F4	51	post-treatment	2016-07-11		17	17F4	expt sheep	F4	Back right	back foot	right	foot	23.3679	0	0	0	34.22	1	0	0	0	0	1	1			0	no disease					0		0		0	0	0	0		1.38682	0	0	0	1.54679	1.05716	scald
1	31-15-F1	31	pre-treatment	2016-05-09	31	15	15F1	expt sheep	F1	Front left	front foot	left	foot	184.317	503417	0	0	822.101	1	1	1	0	0	1	1	2	3	footrot	FR		0	0				0		0	1	0	0	20583	2.26792	5.70193	0	0	2.91545	2.4378	codd
1	41-6-F2	41	pre-treatment	2016-06-06	41	6	6F2	expt sheep	F2	Front right	front foot	right	foot	0	0	0	0	0	0	0	0	0	0	0	0	2	3	0	no disease		0		0			0		0	0	0	0	20611	0	0	0	0	0		footrot
1	5-5-F2	5	pre-treatment	2016-02-08	5	5	5F2	expt sheep	F2	Front right	front foot	right	foot	0	0	0	0	8.2483	0	0	0	0	0	0	0	3	0	0	no disease		1		0			0		0	0	0	0	20492	0	0	0	0	0.966062	0.439243	codd
1	17-6-F4	17	pre-treatment	2016-03-21		6	6F4	expt sheep	F4	Back right	back foot	right	foot	0	0	0	0	0	0	0	0	0	0	0	0			0	no disease					0		0		0	0	0	0		0	0	0	0	0		no disease
0	1-9-F3	1	pre-treatment	2016-01-26	1	9	9F3	expt sheep	F3	Back left	back foot	left	foot	0	0	0	0	0	0	0	0	0	0	0	0	3	0	0	no disease		1				0	0		0	0	0	0	20479	0	0	0	0	0		no disease
1	51-5-F3	51	post-treatment	2016-07-11	51	5	5F3	expt sheep	F3	Back left	back foot	left	foot	0	0	0	0	0	0	0	0	0	0	0	0	3	0	0	no disease		0				0	0		0	0	0	0	20646	0	0	0	0	0		codd
1	13-11-F1	13	pre-treatment	2016-03-07	13	11	11F1	expt sheep	F1	Front left	front foot	left	foot	0	0	0	0	0	0	0	0	0	0	0	0	3	0	0	no disease		1	0				0		0	0	0	0	20520	0	0	0	0	0		scald
1	41-27-F3	41	pre-treatment	2016-06-06	41	27	27F3	expt sheep	F3	Back left	back foot	left	foot	0	0	0	0	5.40535	0	0	0	0	0	0	0	3	0	0	no disease		0				0	0		0	0	0	0	20611	0	0	0	0	0.806543	0.255703	no disease
1	25-23-F1	25	pre-treatment	2016-04-18	25	23	23F1	expt sheep	F1	Front left	front foot	left	foot	0	0	0	0	0	0	0	0	0	0	0	0	2	3	0	no disease		1	0				0		0	0	0	0	20562	0	0	0	0	0		no disease
0	1-25-F4	1	pre-treatment	2016-01-26	1	25	25F4	expt sheep	F4	Back right	back foot	right	foot	0	0	0	0	0	0	0	0	0	0	0	0	2	0	0	no disease		1			0		0		0	0	0	0	20479	0	0	0	0	0		no disease
1	43-24-F1	43	post-treatment	2016-06-13	43	24	24F1	expt sheep	F1	Front left	front foot	left	foot	0	0	0	2.72567	0	0	0	0	0	0	0	0	3	0	0	no disease		1	0				0		0	0	0	0	20618	0	0	0	0.571204	0	-0.0416481	no disease
1	5-29-F3	5	pre-treatment	2016-02-08	5	29	29F3	expt sheep	F3	Back left	back foot	left	foot	0	0	0	0	0	0	0	0	0	0	0	0	3	0	0	no disease		1				0	0		0	0	0	0	20492	0	0	0	0	0		no disease
1	27-5-F1	27	pre-treatment	2016-04-25	27	5	5F1	expt sheep	F1	Front left	front foot	left	foot	951.399	28546.4	0	0	5.72061	1	1	1	0	0	0	0	3	1	0	no disease		0	0				0		0	0	0	0	20569	2.97882	4.45557	0	0	0.827409	0.280321	codd
1	38-26-F1	38	pre-treatment	2016-05-31	38	26	26F1	expt sheep	F1	Front left	front foot	left	foot	0	0	21.992	0.993927	0	1	0	0	0	0	0	0	3	0	0	no disease		1	0				0		0	0	0	0	20605	0	0	1.36158	0.299709	0	0.88434	codd
1	19-17-F4	19	pre-treatment	2016-03-28	19	17	17F4	expt sheep	F4	Back right	back foot	right	foot	0	0	34.237	2.65994	13.6024	1	0	0	1	0	1	1	4	0	0	no disease		0			0		0		0	0	0	0	20541	0	0	1.547	0.563474	1.16442	1.22616	scald
1	23-15-F3	23	pre-treatment	2016-04-11	23	15	15F3	expt sheep	F3	Back left	back foot	left	foot	0	8163.66	0	2.45462	0	1	0	1	0	0	0	0	3	3	0	no disease		0				0	0		0	0	0	0	20555	0	3.91194	0	0.5384	0	-0.0871369	codd
1	41-11-F4	41	pre-treatment	2016-06-06	41	11	11F4	expt sheep	F4	Back right	back foot	right	foot	0	0	142.872	18.5464	7.64576	1	0	0	1	0	0	1	3	0	0	no disease		0			0		0		0	0	0	0	20611	0	0	2.15798	1.29107	0.936803	1.75093	no disease
1	41-22-F1	41	pre-treatment	2016-06-06	41	22	22F1	expt sheep	F1	Front left	front foot	left	foot	30.7461	0	0	0	0	1	0	0	0	0	0	0	3	0	0	no disease		0	0				0		0	0	0	0	20611	1.50169	0	0	0	0		scald
1	5-7-F1	5	pre-treatment	2016-02-08	5	7	7F1	expt sheep	F1	Front left	front foot	left	foot	0	0	0	0	0	0	0	0	0	0	0	0	3	0	0	no disease		1	0				0		0	0	0	0	20492	0	0	0	0	0		codd
1	21-11-F3	21	pre-treatment	2016-04-04	21	11	11F3	expt sheep	F3	Back left	back foot	left	foot	0	0	0	0	0	0	0	0	0	0	0	0	3	0	0	no disease		1				0	0		0	0	0	0	20548	0	0	0	0	0		scald
1	33-21-F1	33	pre-treatment	2016-05-16	33	21	21F1	expt sheep	F1	Front left	front foot	left	foot	0	0	0	0	0	0	0	0	0	0	0	0	4	0	0	no disease		1	0				0		0	0	0	0	20590	0	0	0	0	0		no disease
1	29-1-F1	29	pre-treatment	2016-05-03	29	1	1F1	expt sheep	F1	Front left	front foot	left	foot	0	0	0	0	0	0	0	0	0	0	0	0	3	0	0	no disease		1	0				0		0	0	0	0	20577	0	0	0	0	0		no disease
1	7-12-F4	7	pre-treatment	2016-02-15		12	12F4	expt sheep	F4	Back right	back foot	right	foot	0	0	0	0	4.80153	0	0	0	0	0	0	0			0	no disease					0		0		0	0	0	0	20499	0	0	0	0	0.763542	0.204258	no disease
1	15-15-F4	15	pre-treatment	2016-03-14	15	15	15F4	expt sheep	F4	Back right	back foot	right	foot	0	0	0	0	0	0	0	0	0	0	0	0	2	2	0	no disease		0			0		0		0	0	0	0	20527	0	0	0	0	0		footrot
1	25-2-F4	25	pre-treatment	2016-04-18	25	2	2F4	expt sheep	F4	Back right	back foot	right	foot	0	123.312	0	0	0	1	0	1	0	0	0	0	3	2	0	no disease		1			0		0		0	0	0	0	20562	0	2.09451	0	0	0		footrot
1	43-26-F4	43	post-treatment	2016-06-13	43	26	26F4	expt sheep	F4	Back right	back foot	right	foot	14.6689	0	0	0	0	0	0	0	0	0	0	0	3	0	0	no disease		1			0		0		0	0	0	0	20618	1.19504	0	0	0	0		no disease
1	27-3-F2	27	pre-treatment	2016-04-25	27	3	3F2	expt sheep	F2	Front right	front foot	right	foot	846.641	52194	0	0	0	1	1	1	0	0	0	0	4	2	0	no disease		0		0			0		0	0	0	0	20569	2.92821	4.71763	0	0	0		codd
1	19-15-F3	19	pre-treatment	2016-03-28	19	15	15F3	expt sheep	F3	Back left	back foot	left	foot	0	0	0	0	4.19198	0	0	0	0	0	0	0	3	3	0	no disease		0				0	0		0	0	0	0	20541	0	0	0	0	0.715333	0.145298	codd
1	1-19-F4	1	pre-treatment	2016-01-26	1	19	19F4	expt sheep	F4	Back right	back foot	right	foot	0	0	0	0	0	0	0	0	0	0	0	0	2	0	WL	other		1			0		0		0	0	0	1	20479	0	0	0	0	0		no disease
1	25-14-F3	25	pre-treatment	2016-04-18	25	14	14F3	expt sheep	F3	Back left	back foot	left	foot	4184.16	12114.5	0	491.745	0	1	1	1	0	1	0	1	3	0	scald	ID		1				0	0		1	0	0	0	20562	3.62171	4.08334	0	2.69262	0	2.21462	codd
1	25-27-F4	25	pre-treatment	2016-04-18	25	27	27F4	expt sheep	F4	Back right	back foot	right	foot	0	0	0	0	15.9558	0	0	0	0	0	1	1	3	0	0	no disease		1			0		0		0	0	0	0	20562	0	0	0	0	1.22932	0.725798	scald
1	33-15-F1	33	pre-treatment	2016-05-16	33	15	15F1	expt sheep	F1	Front left	front foot	left	foot	23.8431	251802	0	0	1159.6	1	0	1	0	0	1	1	2	3	fr&CODD	CODD	CODD & footrot	1	1				1	codd1-4	0	0	1	0	20590	1.39521	5.40106	0	0	3.06468	2.58719	codd
1	38-7-F3	38	pre-treatment	2016-05-31	38	7	7F3	expt sheep	F3	Back left	back foot	left	foot	0	0	0	0	0	0	0	0	0	0	0	0	2	3	0	no disease		1				0	0		0	0	0	0	20605	0	0	0	0	0		scald
1	43-4-F4	43	post-treatment	2016-06-13	43	4	4F4	expt sheep	F4	Back right	back foot	right	foot	0	0	0	0	7.97585	0	0	0	0	0	0	0	3	3	0	no disease		1			0		0		0	0	0	0	20618	0	0	0	0	0.953076	0.424656	no disease
1	33-21-F2	33	pre-treatment	2016-05-16	33	21	21F2	expt sheep	F2	Front right	front foot	right	foot	86.0346	0	0	0	0	1	1	0	0	0	0	0	4	0	0	no disease		1		0			0		0	0	0	0	20590	1.93969	0	0	0	0		no disease
1	27-13-F1	27	pre-treatment	2016-04-25	27	13	13F1	expt sheep	F1	Front left	front foot	left	foot	99.7381	142.3	82.0049	5.47153	14.0183	1	1	1	1	0	1	1	3	0	0	no disease		0	0				0		0	0	0	0	20569	2.00319	2.15625	1.9191	0.811007	1.17662	1.52932	no disease
1	11-15-F2	11	pre-treatment	2016-02-29	11	15	15F2	expt sheep	F2	Front right	front foot	right	foot	0	0	0	0	0	0	0	0	0	0	0	0	4	0	0	no disease		0		0			0		0	0	0	0	20513	0	0	0	0	0		codd
1	33-19-F4	33	pre-treatment	2016-05-16	33	19	19F4	expt sheep	F4	Back right	back foot	right	foot	0	0	0	0	0	0	0	0	0	0	0	0	2	0	0	no disease		1			0		0		0	0	0	0	20590	0	0	0	0	0		no disease
1	30-42-F3	30	pre-treatment	2016-05-04	30	42	42F3	source sheep	F3	Back left	back foot	left	foot	282.873	0	312.783	38.2945	59.5686	1	1	0	1	1	1	1	2	3	0	no disease		1				0	0		0	0	0	0	20578	2.45312	0	2.49663	1.59433	1.78225	2.13635
1	31-8-F4	31	pre-treatment	2016-05-09	31	8	8F4	expt sheep	F4	Back right	back foot	right	foot	18.7583	31149.5	1332.73	423.185	543.676	1	0	1	1	1	1	1	2	3	scald	ID		0			0		0		1	0	0	0	20583	1.29575	4.49346	3.12507	2.62756	2.73614	2.88453	scald
1	5-16-F3	5	pre-treatment	2016-02-08	5	16	16F3	expt sheep	F3	Back left	back foot	left	foot	10.8236	0	0	0	0	0	0	0	0	0	0	0	3	0	0	no disease		1				0	0		0	0	0	0	20492	1.07275	0	0	0	0		no disease
1	25-12-F2	25	pre-treatment	2016-04-18	25	12	12F2	expt sheep	F2	Front right	front foot	right	foot	47584.2	43453.5	5608.77	2945.09	288.448	1	1	1	1	1	1	1	3	1	scald	ID		1		0			0		1	0	0	0	20562	4.67747	4.63803	3.74895	3.46925	2.46157	3.46944	codd
1	23-2-F1	23	pre-treatment	2016-04-11	23	2	2F1	expt sheep	F1	Front left	front foot	left	foot	0	0	9.56305	0.777541	0	0	0	0	0	0	0	0	3	0	overgrown	other		0	0				0		0	0	0	1	20555	0	0	1.02379	0.24982	0	0.537424	footrot
1	7-6-F3	7	pre-treatment	2016-02-15	7	6	6F3	expt sheep	F3	Back left	back foot	left	foot	2.89527	0	0	0	143.37	1	0	0	0	0	1	1	2	0	0	no disease		0				0	0		0	0	0	0	20499	0.590538	0	0	0	2.15948	1.67934	no disease
1	21-9-F2	21	pre-treatment	2016-04-04	21	9	9F2	expt sheep	F2	Front right	front foot	right	foot	11.5193	0	0	0	0	0	0	0	0	0	0	0	3	0	0	no disease		1		0			0		0	0	0	0	20548	1.09758	0	0	0	0		codd
1	7-15-F3	7	pre-treatment	2016-02-15	7	15	15F3	expt sheep	F3	Back left	back foot	left	foot	0	0	0	0	0	0	0	0	0	0	0	0	4	0	0	no disease		0				0	0		0	0	0	0	20499	0	0	0	0	0		codd
1	17-19-F4	17	pre-treatment	2016-03-21		19	19F4	expt sheep	F4	Back right	back foot	right	foot	0	0	0	6.74297	0	0	0	0	0	0	0	0			0	no disease					0		0		0	0	0	0		0	0	0	0.888908	0	0.35173	no disease
1	9-28-F3	9	pre-treatment	2016-02-22	9	28	28F3	expt sheep	F3	Back left	back foot	left	foot	0	0	0	0	0	0	0	0	0	0	0	0	4	0	0	no disease		1					0		0	0	0	0	20506	0	0	0	0	0		no disease
1	11-5-F3	11	pre-treatment	2016-02-29	11	5	5F3	expt sheep	F3	Back left	back foot	left	foot	22.6162	0	0	0	3.11458	1	0	0	0	0	0	0	3	0	0	no disease		0				0	0		0	0	0	0	20513	1.37321	0	0	0	0.614326	0.0162785	codd
1	27-13-F2	27	pre-treatment	2016-04-25	27	13	13F2	expt sheep	F2	Front right	front foot	right	foot	35.3017	0	390.085	14.9931	19.3117	1	0	0	1	0	1	1	3	0	0	no disease		0		0			0		0	0	0	0	20569	1.55993	0	2.59227	1.20393	1.30775	2.15064	no disease
1	15-10-F4	15	pre-treatment	2016-03-14	15	10	10F4	expt sheep	F4	Back right	back foot	right	foot	0	0	0	0	0	0	0	0	0	0	0	0	2	0	0	no disease		0			0		0		0	0	0	0	20527	0	0	0	0	0		codd
1	7-22-F4	7	pre-treatment	2016-02-15		22	22F4	expt sheep	F4	Back right	back foot	right	foot	0	0	0	0	0	0	0	0	0	0	0	0			0	no disease					0		0		0	0	0	0	20499	0	0	0	0	0		no disease
0	1-29-F2	1	pre-treatment	2016-01-26	1	29	29F2	expt sheep	F2	Front right	front foot	right	foot	0	0	0	0	0	0	0	0	0	0	0	0	3	0	0	no disease		1		0			0		0	0	0	0	20479	0	0	0	0	0		no disease
1	47-2-F2	47	post-treatment	2016-06-27	47	2	2F2	expt sheep	F2	Front right	front foot	right	foot	0	0	0	3.25346	0	0	0	0	0	0	0	0	3	0	CODD	CODD	CODD only	1		5			5	codd5	0	0	1	0	20632	0	0	0	0.628743	0	0.0352247	codd
1	25-18-F3	25	pre-treatment	2016-04-18	25	18	18F3	expt sheep	F3	Back left	back foot	left	foot	0	0	22.7041	0	12.1718	1	0	0	0	0	1	1	3	0	0	no disease		1				0	0		0	0	0	0	20562	0	0	1.37482	0	1.11964	1.0654	no disease
1	7-7-F3	7	pre-treatment	2016-02-15	7	7	7F3	expt sheep	F3	Back left	back foot	left	foot	0	0	0	0	36.0027	1	0	0	0	0	1	1	3	0	0	no disease		0				0	0		0	0	0	0	20499	0	0	0	0	1.56823	1.07921	scald
1	41-20-F3	41	pre-treatment	2016-06-06	41	20	20F3	expt sheep	F3	Back left	back foot	left	foot	0	0	0	0	0	0	0	0	0	0	0	0	3	0	0	no disease		0				0	0		0	0	0	0	20611	0	0	0	0	0		no disease
1	33-10-F4	33	pre-treatment	2016-05-16	33	10	10F4	expt sheep	F4	Back right	back foot	right	foot	2600.25	6976.73	16414.1	11735	4058.75	1	1	1	1	1	1	1	3	0	scald	ID		1			0		0		1	0	0	0	20590	3.41518	3.84371	4.21524	4.06952	3.6085	4.03084	codd
1	15-24-F1	15	pre-treatment	2016-03-14	15	24	24F1	expt sheep	F1	Front left	front foot	left	foot	0	0	0	0	6.1797	0	0	0	0	0	0	0	4	0	0	no disease		0	0				0		0	0	0	0	20527	0	0	0	0	0.856106	0.313846	no disease
1	15-11-F2	15	pre-treatment	2016-03-14	15	11	11F2	expt sheep	F2	Front right	front foot	right	foot	0	0	0	0	0	0	0	0	0	0	0	0	2	0	0	no disease		0		0			0		0	0	0	0	20527	0	0	0	0	0		scald
1	13-22-F3	13	pre-treatment	2016-03-07	13	22	22F3	expt sheep	F3	Back left	back foot	left	foot	0	0	0	6.10167	0	0	0	0	0	0	0	0	3	0	0	no disease		1				0	0		0	0	0	0	20520	0	0	0	0.85136	0	0.308327	scald
1	19-5-F4	19	pre-treatment	2016-03-28	19	5	5F4	expt sheep	F4	Back right	back foot	right	foot	23.1084	0	0	1.97937	0	1	0	0	0	0	0	0	3	0	0	no disease		0			0		0		0	0	0	0	20541	1.38217	0	0	0.474124	0	-0.180595	codd
1	7-24-F3	7	pre-treatment	2016-02-15	7	24	24F3	expt sheep	F3	Back left	back foot	left	foot	7.51679	0	0	0	4.58582	0	0	0	0	0	0	0	4	0	0	no disease		0				0	0		0	0	0	0	20499	0.930276	0	0	0	0.747087	0.184296	no disease
1	43-22-F4	43	post-treatment	2016-06-13	43	22	22F4	expt sheep	F4	Back right	back foot	right	foot	0	0	0	0	0	0	0	0	0	0	0	0	3	0	0	no disease		1			0		0		0	0	0	0	20618	0	0	0	0	0		no disease
1	47-14-F2	47	post-treatment	2016-06-27	47	14	14F2	expt sheep	F2	Front right	front foot	right	foot	0	0	0	0	0	0	0	0	0	0	0	0	2	1	0	no disease		1		0			0		0	0	0	0	20632	0	0	0	0	0		scald
1	7-17-F3	7	pre-treatment	2016-02-15	7	17	17F3	expt sheep	F3	Back left	back foot	left	foot	0	0	0	0	0	0	0	0	0	0	0	0	4	0	0	no disease		0					0		0	0	0	0	20499	0	0	0	0	0		scald
1	43-25-F1	43	post-treatment	2016-06-13	43	25	25F1	expt sheep	F1	Front left	front foot	left	foot	124.85	0	63.4547	1.91035	0	1	1	0	1	0	0	1	3	0	0	no disease		1	0				0		0	0	0	0	20618	2.09985	0	1.80925	0.463945	0	1.33822	no disease
1	19-6-F2	19	pre-treatment	2016-03-28	19	6	6F2	expt sheep	F2	Front right	front foot	right	foot	0	0	0	0	0	0	0	0	0	0	0	0	3	0	overgrown	other		0		0			0		0	0	0	1	20541	0	0	0	0	0		footrot
1	51-25-F3	51	post-treatment	2016-07-11	51	25	25F3	expt sheep	F3	Back left	back foot	left	foot	0	0	0	0	0	0	0	0	0	0	0	0	3	0	0	no disease		0				0	0		0	0	0	0	20646	0	0	0	0	0		no disease
1	21-6-F2	21	pre-treatment	2016-04-04	21	6	6F2	expt sheep	F2	Front right	front foot	right	foot	0	0	0	0	0	0	0	0	0	0	0	0	3	0	0	no disease		1		0			0		0	0	0	0	20548	0	0	0	0	0		footrot
1	23-24-F4	23	pre-treatment	2016-04-11	23	24	24F4	expt sheep	F4	Back right	back foot	right	foot	24.5854	0	37.8342	5.50187	7.5425	1	0	0	1	0	0	1	3	0	0	no disease		0			0		0		0	0	0	0	20555	1.40799	0	1.58921	0.813038	0.931585	1.22941	no disease
1	43-2-F1	43	post-treatment	2016-06-13	43	2	2F1	expt sheep	F1	Front left	front foot	left	foot	79.174	1230.14	0	0	0	1	1	1	0	0	0	0	3	2	0	no disease		1	0				0		0	0	0	0	20618	1.90403	3.09031	0	0	0		footrot
1	17-16-F1	17	pre-treatment	2016-03-21	17	16	16F1	expt sheep	F1	Front left	front foot	left	foot	0	0	50.8629	0	0	1	0	0	1	0	0	1	3	0	0	no disease		1	0				0		0	0	0	0	20534	0	0	1.71486	0	0	1.22928	no disease
1	17-14-F3	17	pre-treatment	2016-03-21	17	14	14F3	expt sheep	F3	Back left	back foot	left	foot	0	0	0	0	0	0	0	0	0	0	0	0	3	0	0	no disease		1				0	0		0	0	0	0	20534	0	0	0	0	0		codd
1	38-27-F4	38	pre-treatment	2016-05-31	38	27	27F4	expt sheep	F4	Back right	back foot	right	foot	45.1977	0	15.4968	5.36278	9.60554	1	1	0	0	0	0	0	3	0	0	no disease		1			0		0		0	0	0	0	20605	1.66462	0	1.2174	0.803647	1.02553	1.00668	scald
1	9-22-F2	9	pre-treatment	2016-02-22	9	22	22F2	expt sheep	F2	Front right	front foot	right	foot	0	0	0	0	0	0	0	0	0	0	0	0	4	0	0	no disease		1					0		0	0	0	0	20506	0	0	0	0	0		no disease
1	9-5-F3	9	pre-treatment	2016-02-22	9	5	5F3	expt sheep	F3	Back left	back foot	left	foot	26.3089	0	0	0	6.36632	1	0	0	0	0	0	0	3	0	scald	ID		1					0		1	0	0	0	20506	1.4363	0	0	0	0.867251	0.326767	codd
1	11-17-F3	11	pre-treatment	2016-02-29	11	17	17F3	expt sheep	F3	Back left	back foot	left	foot	0	0	0	0	0	0	0	0	0	0	0	0	4	0	scald	ID		0				0	0		1	0	0	0	20513	0	0	0	0	0		scald
1	43-23-F4	43	post-treatment	2016-06-13	43	23	23F4	expt sheep	F4	Back right	back foot	right	foot	149.01	0	35939.4	5295.31	494.017	1	1	0	1	1	1	1	2	3	fr&CODD	CODD	CODD & footrot	1			4		4	codd1-4	0	0	1	0	20618	2.17612	0	4.55558	3.72397	2.69462	4.14331	codd
1	41-26-F4	41	pre-treatment	2016-06-06	41	26	26F4	expt sheep	F4	Back right	back foot	right	foot	0	0	0	0	0	0	0	0	0	0	0	0	3	0	0	no disease		0			0		0		0	0	0	0	20611	0	0	0	0	0		no disease
1	38-9-F3	38	pre-treatment	2016-05-31	38	9	9F3	expt sheep	F3	Back left	back foot	left	foot	0	0	0	2.96739	2.9525	0	0	0	0	0	0	0	3	1	0	no disease		1				0	0		0	0	0	0	20605	0	0	0	0.598505	0.596872	0.295193	no disease
1	41-13-F4	41	pre-treatment	2016-06-06	41	13	13F4	expt sheep	F4	Back right	back foot	right	foot	0	0	0	1.95217	0	0	0	0	0	0	0	0	2	0	0	no disease		0			0		0		0	0	0	0	20611	0	0	0	0.470141	0	-0.186604	no disease
1	51-2-F3	51	post-treatment	2016-07-11	51	2	2F3	expt sheep	F3	Back left	back foot	left	foot	0	0	0	0	0	0	0	0	0	0	0	0	2	1	scald	ID		0				0	0		1	0	0	0	20646	0	0	0	0	0		footrot
1	19-10-F2	19	pre-treatment	2016-03-28	19	10	10F2	expt sheep	F2	Front right	front foot	right	foot	0	0	0	0	0	0	0	0	0	0	0	0	3	0	overgrown	other		0		0			0		0	0	0	1	20541	0	0	0	0	0		footrot
1	31-7-F3	31	pre-treatment	2016-05-09	31	7	7F3	expt sheep	F3	Back left	back foot	left	foot	9.02579	0	0	0	0	0	0	0	0	0	0	0	3	0	0	no disease		0				0	0		0	0	0	0	20583	1.00112	0	0	0	0		scald
1	15-27-F1	15	pre-treatment	2016-03-14	15	27	27F1	expt sheep	F1	Front left	front foot	left	foot	0	0	0	0	0	0	0	0	0	0	0	0	4	0	0	no disease		0	0				0		0	0	0	0	20527	0	0	0	0	0		no disease
1	38-19-F2	38	pre-treatment	2016-05-31	38	19	19F2	expt sheep	F2	Front right	front foot	right	foot	0	0	0	0	0	0	0	0	0	0	0	0	2	0	0	no disease		1		0			0		0	0	0	0	20605	0	0	0	0	0		no disease
1	9-26-F1	9	pre-treatment	2016-02-22	9	26	26F1	expt sheep	F1	Front left	front foot	left	foot	0	0	0	0	5.77442	0	0	0	0	0	0	0	4	0	0	no disease		1	0				0		0	0	0	0	20506	0	0	0	0	0.830872	0.284387	codd
1	5-14-F2	5	pre-treatment	2016-02-08	5	14	14F2	expt sheep	F2	Front right	front foot	right	foot	0	0	0	0	0	0	0	0	0	0	0	0	3	0	0	no disease		1		0			0		0	0	0	0	20492	0	0	0	0	0		scald
1	21-3-F1	21	pre-treatment	2016-04-04	21	3	3F1	expt sheep	F1	Front left	front foot	left	foot	0	0	0	0	0	0	0	0	0	0	0	0	4	0	0	no disease		1	0				0		0	0	0	0	20548	0	0	0	0	0		codd
1	51-21-F4	51	post-treatment	2016-07-11	51	21	21F4	expt sheep	F4	Back right	back foot	right	foot	0	0	0	0	9.04933	0	0	0	0	0	0	0	3	0	0	no disease		0			0		0		0	0	0	0	20646	0	0	0	0	1.00214	0.479495	no disease
1	5-18-F2	5	pre-treatment	2016-02-08	5	18	18F2	expt sheep	F2	Front right	front foot	right	foot	0	0	0	0	7.02707	0	0	0	0	0	0	0	3	0	0	no disease		1		0			0		0	0	0	0	20492	0	0	0	0	0.904557	0.369653	no disease
1	9-15-F1	9	pre-treatment	2016-02-22	9	15	15F1	expt sheep	F1	Front left	front foot	left	foot	3372.72	0	0	0	0	1	1	0	0	0	0	0	3	0	0	no disease		1	0				0		0	0	0	0	20506	3.52811	0	0	0	0		codd
1	33-3-F2	33	pre-treatment	2016-05-16	33	3	3F2	expt sheep	F2	Front right	front foot	right	foot	676.382	10734	386125	18810.2	45860.8	1	1	1	1	1	1	1	3	3	footrot	FR		1		0			0		0	1	0	0	20590	2.83083	4.0308	5.58673	4.27442	4.66145	5.17686	codd
1	13-26-F1	13	pre-treatment	2016-03-07	13	26	26F1	expt sheep	F1	Front left	front foot	left	foot	0	0	0	1.87021	3.27735	0	0	0	0	0	0	0	3	0	0	no disease		1	0				0		0	0	0	0	20520	0	0	0	0.457914	0.631175	0.234481	codd
1	1-17-F3	1	pre-treatment	2016-01-26	1	17	17F3	expt sheep	F3	Back left	back foot	left	foot	0	0	0	0	0	0	0	0	0	0	0	0	3	0	0	no disease		1				0	0		0	0	0	0	20479	0	0	0	0	0		scald
1	13-18-F2	13	pre-treatment	2016-03-07	13	18	18F2	expt sheep	F2	Front right	front foot	right	foot	26.7332	0	0	16.1911	11.633	1	0	0	0	0	1	1	3	0	0	no disease		1		0			0		0	0	0	0	20520	1.443	0	0	1.2353	1.10151	0.9673	no disease
1	33-30-F3	33	pre-treatment	2016-05-16	33	30	30F3	expt sheep	F3	Back left	back foot	left	foot	0	0	26.7283	10.5252	0	1	0	0	0	0	0	0	3	0	0	no disease		1				0	0		0	0	0	0	20590	0	0	1.44292	1.06165	0	1.09405	scald
1	25-23-F2	25	pre-treatment	2016-04-18	25	23	23F2	expt sheep	F2	Front right	front foot	right	foot	0	0	0	0	0	0	0	0	0	0	0	0	2	3	0	no disease		1		0			0		0	0	0	0	20562	0	0	0	0	0		no disease
1	25-14-F4	25	pre-treatment	2016-04-18	25	14	14F4	expt sheep	F4	Back right	back foot	right	foot	0	165.688	35.575	0	3.76534	1	0	1	1	0	0	1	3	0	0	no disease		1			0		0		0	0	0	0	20562	0	2.2219	1.56318	0	0.678094	1.11772	codd
1	11-27-F3	11	pre-treatment	2016-02-29	11	27	27F3	expt sheep	F3	Back left	back foot	left	foot	22.2638	0	53.3889	5.90014	20.8862	1	0	0	1	0	1	1	3	0	0	no disease		0				0	0		0	0	0	0	20513	1.36668	0	1.73551	0.838858	1.34017	1.42692	no disease
1	27-14-F3	27	pre-treatment	2016-04-25	27	14	14F3	expt sheep	F3	Back left	back foot	left	foot	41712.1	16307.7	27710.7	48747.8	934.643	1	1	1	1	1	1	1	3	1	scald	ID		0				0	0		1	0	0	0	20569	4.62027	4.21242	4.44266	4.68796	2.97111	4.41158	codd
0	31-26-F3	31	pre-treatment	2016-05-09	31	26	26F3	expt sheep	F3	Back left	back foot	left	foot	0	0	0	0	0	0	0	0	0	0	0	0	3	0	0	no disease		0				0	0		0	0	0	0	20583	0	0	0	0	0		no disease
1	31-29-F4	31	pre-treatment	2016-05-09	31	29	29F4	expt sheep	F4	Back right	back foot	right	foot	0	0	0	0	0	0	0	0	0	0	0	0	3	0	0	no disease		0			0		0		0	0	0	0	20583	0	0	0	0	0		scald
1	15-1-F4	15	pre-treatment	2016-03-14	15	1	1F4	expt sheep	F4	Back right	back foot	right	foot	0	0	0	0	0	0	0	0	0	0	0	0	3	0	0	no disease		0			0		0		0	0	0	0	20527	0	0	0	0	0		no disease
1	41-20-F4	41	pre-treatment	2016-06-06	41	20	20F4	expt sheep	F4	Back right	back foot	right	foot	0	0	0	0	0	0	0	0	0	0	0	0	3	0	0	no disease		0			0		0		0	0	0	0	20611	0	0	0	0	0		no disease
1	31-22-F3	31	pre-treatment	2016-05-09	31	22	22F3	expt sheep	F3	Back left	back foot	left	foot	20.9723	0	0	4.09836	6.59838	1	0	0	0	0	0	0	3	0	0	no disease		0				0	0		0	0	0	0	20583	1.34188	0	0	0.707431	0.880721	0.55213	scald
1	23-3-F2	23	pre-treatment	2016-04-11	23	3	3F2	expt sheep	F2	Front right	front foot	right	foot	11.819	0	0	0	0	0	0	0	0	0	0	0	4	0	0	no disease		0		0			0		0	0	0	0	20555	1.10785	0	0	0	0		codd
1	9-8-F4	9	pre-treatment	2016-02-22		8	8F4	expt sheep	F4	Back right	back foot	right	foot	18.7492	0	0	0	0	0	0	0	0	0	0	0			0	no disease					0		0		0	0	0	0		1.29555	0	0	0	0		scald
1	21-28-F1	21	pre-treatment	2016-04-04	21	28	28F1	expt sheep	F1	Front left	front foot	left	foot	0	0	0	0	0	0	0	0	0	0	0	0	4	0	overgrown	other		1	0				0		0	0	0	1	20548	0	0	0	0	0		no disease
0	29-5-F3	29	pre-treatment	2016-05-03	29	5	5F3	expt sheep	F3	Back left	back foot	left	foot	0	0	0	0	0	0	0	0	0	0	0	0	3	3	0	no disease		1				0	0		0	0	0	0	20577	0	0	0	0	0		codd
1	5-3-F3	5	pre-treatment	2016-02-08	5	3	3F3	expt sheep	F3	Back left	back foot	left	foot	0	0	0	0	0	0	0	0	0	0	0	0	3	0	0	no disease		1				0	0		0	0	0	0	20492	0	0	0	0	0		no disease
1	41-23-F3	41	pre-treatment	2016-06-06	41	23	23F3	expt sheep	F3	Back left	back foot	left	foot	92.2244	0	0	6.5739	9.64963	1	1	0	0	0	0	0	2	2	0	no disease		0				0	0		0	0	0	0	20611	1.96953	0	0	0.87932	1.02733	0.733024	codd
1	38-18-F3	38	pre-treatment	2016-05-31	38	18	18F3	expt sheep	F3	Back left	back foot	left	foot	0	0	0	4.26096	8.17465	0	0	0	0	0	0	0	3	0	0	no disease		1				0	0		0	0	0	0	20605	0	0	0	0.721065	0.962589	0.617546	no disease
1	21-4-F4	21	pre-treatment	2016-04-04	21	4	4F4	expt sheep	F4	Back right	back foot	right	foot	0	0	0	0	11.1625	0	0	0	0	0	1	1	3	0	0	no disease		1			0		0		0	0	0	0	20548	0	0	0	0	1.08502	0.570641	no disease
1	51-22-F2	51	post-treatment	2016-07-11	51	22	22F2	expt sheep	F2	Front right	front foot	right	foot	0	0	0	0	0	0	0	0	0	0	0	0	3	0	0	no disease		0		0			0		0	0	0	0	20646	0	0	0	0	0		no disease
1	21-7-F4	21	pre-treatment	2016-04-04	21	7	7F4	expt sheep	F4	Back right	back foot	right	foot	0	0	0	0	9.35156	0	0	0	0	0	0	0	3	1	0	no disease		1			0		0		0	0	0	0	20548	0	0	0	0	1.01501	0.493763	scald
1	9-8-F1	9	pre-treatment	2016-02-22	9	8	8F1	expt sheep	F1	Front left	front foot	left	foot	17.9308	0	0	0	0	0	0	0	0	0	0	0	3	0	0	no disease		1	0				0		0	0	0	0	20506	1.27717	0	0	0	0		no disease
1	13-21-F2	13	pre-treatment	2016-03-07	13	21	21F2	expt sheep	F2	Front right	front foot	right	foot	50.5583	0	0	0	0	1	1	0	0	0	0	0	3	0	0	no disease		1		0			0		0	0	0	0	20520	1.7123	0	0	0	0		no disease
1	33-27-F3	33	pre-treatment	2016-05-16	33	27	27F3	expt sheep	F3	Back left	back foot	left	foot	0	0	0	12.8513	0	0	0	0	0	0	0	0	3	0	0	no disease		1				0	0		0	0	0	0	20590	0	0	0	1.14149	0	0.631827	no disease
1	25-6-F4	25	pre-treatment	2016-04-18	25	6	6F4	expt sheep	F4	Back right	back foot	right	foot	0	0	0	0	7.07267	0	0	0	0	0	0	0	3	0	0	no disease		1			0		0		0	0	0	0	20562	0	0	0	0	0.907017	0.372462	no disease
0	33-48-F3	33	pre-treatment	2016-05-16	33	48	48F3	source sheep	F3	Back left	back foot	left	foot	0	0	0	0	0	0	0	0	0	0	0	0	2	3	0	no disease		1				0	0		0	0	0	0	20590	0	0	0	0	0
1	38-27-F1	38	pre-treatment	2016-05-31	38	27	27F1	expt sheep	F1	Front left	front foot	left	foot	0	0	0	0	8.96114	0	0	0	0	0	0	0	3	0	0	no disease		1	0				0		0	0	0	0	20605	0	0	0	0	0.998309	0.475242	no disease
1	47-16-F4	47	post-treatment	2016-06-27	47	16	16F4	expt sheep	F4	Back right	back foot	right	foot	8.50809	0	0	0	0	0	0	0	0	0	0	0	3	0	0	no disease		1			0		0		0	0	0	0	20632	0.978093	0	0	0	0		no disease
1	23-2-F3	23	pre-treatment	2016-04-11	23	2	2F3	expt sheep	F3	Back left	back foot	left	foot	0	0	0	0.398164	0	0	0	0	0	0	0	0	3	0	0	no disease		0				0	0		0	0	0	0	20555	0	0	0	0.145558	0	-0.87706	footrot
1	30-42-F2	30	pre-treatment	2016-05-04	30	42	42F2	source sheep	F2	Front right	front foot	right	foot	514.66	0	0	26.7362	19.5894	1	1	0	0	1	1	1	2	3	0	no disease		1		0			0		0	0	0	0	20578	2.71236	0	0	1.44305	1.31364	1.1887
0	1-10-F4	1	pre-treatment	2016-01-26	1	10	10F4	expt sheep	F4	Back right	back foot	right	foot	0	0	0	0	5.42164	0	0	0	0	0	0	0	3	0	0	no disease		1			0		0		0	0	0	0	20479	0	0	0	0	0.807646	0.257009	codd
1	19-13-F1	19	pre-treatment	2016-03-28	19	13	13F1	expt sheep	F1	Front left	front foot	left	foot	0	0	0	0	0	0	0	0	0	0	0	0	3	0	0	no disease		0	0				0		0	0	0	0	20541	0	0	0	0	0		no disease
1	21-9-F4	21	pre-treatment	2016-04-04	21	9	9F4	expt sheep	F4	Back right	back foot	right	foot	0	0	0	0	0	0	0	0	0	0	0	0	3	0	0	no disease		1			0		0		0	0	0	0	20548	0	0	0	0	0		no disease
1	25-7-F1	25	pre-treatment	2016-04-18	25	7	7F1	expt sheep	F1	Front left	front foot	left	foot	59693.2	47209.7	0	64.9791	0	1	1	1	0	1	0	1	3	3	0	no disease		1	0				0		0	0	0	0	20562	4.77593	4.67404	0	1.81941	0	1.33565	codd
1	5-6-F4	5	pre-treatment	2016-02-08	5	6	6F4	expt sheep	F4	Back right	back foot	right	foot	0	0	0	0	8.76304	0	0	0	0	0	0	0	3	0	0	no disease		1			0		0		0	0	0	0	20492	0	0	0	0	0.989585	0.465534	no disease
1	27-3-F1	27	pre-treatment	2016-04-25	27	3	3F1	expt sheep	F1	Front left	front foot	left	foot	1757.23	29853.4	0	1315.13	190.094	1	1	1	0	1	1	1	4	2	footrot	FR		0	0				0		0	1	0	0	20569	3.24508	4.47501	0	3.1193	2.28125	2.70048	codd
1	23-4-F4	23	pre-treatment	2016-04-11	23	4	4F4	expt sheep	F4	Back right	back foot	right	foot	0	0	191.643	21.8295	16.3854	1	0	0	1	0	1	1	3	0	0	no disease		0			0		0		0	0	0	0	20555	0	0	2.28475	1.3585	1.24018	1.88434	no disease
0	3-33-F1	3	pre-treatment	2016-02-02	3	33	33F1	source sheep	F1	Front left	front foot	left	foot	0	0	0	0	0	0	0	0	0	0	0	0	2	3	0	no disease		1	0				0		0	0	0	0	20486	0	0	0	0	0
1	15-3-F4	15	pre-treatment	2016-03-14	15	3	3F4	expt sheep	F4	Back right	back foot	right	foot	0	0	0	0	0	0	0	0	0	0	0	0	4	0	0	no disease		0			0		0		0	0	0	0	20527	0	0	0	0	0		no disease
1	27-10-F1	27	pre-treatment	2016-04-25	27	10	10F1	expt sheep	F1	Front left	front foot	left	foot	0	299.34	0	0	0	1	0	1	0	0	0	0	3	0	0	no disease		0	0				0		0	0	0	0	20569	0	2.47761	0	0	0		no disease
1	47-1-F1	47	post-treatment	2016-06-27	47	1	1F1	expt sheep	F1	Front left	front foot	left	foot	40.5461	0	272.981	13.1366	8.43558	1	0	0	1	0	0	1	2	0	0	no disease		1	0				0		0	0	0	0	20632	1.61853	0	2.43772	1.15034	0.974768	1.99204	no disease
1	35-26-F1	35	pre-treatment	2016-05-23	35	26	26F1	expt sheep	F1	Front left	front foot	left	foot	0	0	34.2715	7.50836	0	1	0	0	1	0	0	1	3	0	0	no disease		0	0				0		0	0	0	0	20597	0	0	1.54742	0.929846	0	1.14385	codd
1	38-23-F1	38	pre-treatment	2016-05-31	38	23	23F1	expt sheep	F1	Front left	front foot	left	foot	0	0	6.62672	20.1046	24.7255	1	0	0	0	0	1	1	2	3	0	no disease		1	0				0		0	0	0	0	20605	0	0	0.882338	1.32438	1.41036	1.23432	no disease
1	41-25-F4	41	pre-treatment	2016-06-06	41	25	25F4	expt sheep	F4	Back right	back foot	right	foot	152.418	0	14.5892	11.3397	0	1	1	0	0	0	0	0	3	0	0	no disease		0			0		0		0	0	0	0	20611	2.18588	0	1.19282	1.09131	0	0.936662	no disease
1	23-9-F1	23	pre-treatment	2016-04-11	23	9	9F1	expt sheep	F1	Front left	front foot	left	foot	625.821	10736	0	0	5.09498	1	1	1	0	0	0	0	3	0	0	no disease		0	0				0		0	0	0	0	20555	2.79714	4.03088	0	0	0.784972	0.230021	codd
1	5-2-F4	5	pre-treatment	2016-02-08	5	2	2F4	expt sheep	F4	Back right	back foot	right	foot	0	0	0	0	0	0	0	0	0	0	0	0	3	0	0	no disease		1			0		0		0	0	0	0	20492	0	0	0	0	0		footrot
0	1-20-F1	1	pre-treatment	2016-01-26	1	20	20F1	expt sheep	F1	Front left	front foot	left	foot	0	0	0	0	0	0	0	0	0	0	0	0	2	0	0	no disease		1	0				0		0	0	0	0	20479	0	0	0	0	0		no disease
1	51-30-F2	51	post-treatment	2016-07-11	51	30	30F2	expt sheep	F2	Front right	front foot	right	foot	0	0	0	0	5.15769	0	0	0	0	0	0	0	3	3	0	no disease		0		0			0		0	0	0	0	20646	0	0	0	0	0.789418	0.235334	scald
1	27-7-F4	27	pre-treatment	2016-04-25	27	7	7F4	expt sheep	F4	Back right	back foot	right	foot	0	0	0	2.40816	0	0	0	0	0	0	0	0	3	3	0	no disease		0			0		0		0	0	0	0	20569	0	0	0	0.53252	0	-0.0954358	scald
1	31-23-F3	31	pre-treatment	2016-05-09	31	23	23F3	expt sheep	F3	Back left	back foot	left	foot	32.1271	0	0	0	0	1	0	0	0	0	0	0	2	3	0	no disease		0				0	0		0	0	0	0	20583	1.52018	0	0	0	0		codd
1	9-24-F1	9	pre-treatment	2016-02-22	9	24	24F1	expt sheep	F1	Front left	front foot	left	foot	0	0	0	0	21.4213	1	0	0	0	0	1	1	4	0	0	no disease		1	0				0		0	0	0	0	20506	0	0	0	0	1.35066	0.853724	no disease
1	13-20-F4	13	pre-treatment	2016-03-07	13	20	20F4	expt sheep	F4	Back right	back foot	right	foot	21.5783	0	0	0	2.73477	1	0	0	0	0	0	0	3	0	0	no disease		1			0		0		0	0	0	0	20520	1.35369	0	0	0	0.572264	-0.0401998	no disease
1	47-22-F3	47	post-treatment	2016-06-27	47	22	22F3	expt sheep	F3	Back left	back foot	left	foot	0	0	0	0	0	0	0	0	0	0	0	0	3	0	0	no disease		1				0	0		0	0	0	0	20632	0	0	0	0	0		scald
1	5-27-F4	5	pre-treatment	2016-02-08	5	27	27F4	expt sheep	F4	Back right	back foot	right	foot	0	0	0	0	3.81786	0	0	0	0	0	0	0	3	0	0	no disease		1			0		0		0	0	0	0	20492	0	0	0	0	0.682854	0.104698	scald
1	33-13-F4	33	pre-treatment	2016-05-16	33	13	13F4	expt sheep	F4	Back right	back foot	right	foot	0	0	0	1.05465	11.6663	0	0	0	0	0	1	1	2	0	0	no disease		1			0		0		0	0	0	0	20590	0	0	0	0.312737	1.10265	0.627399	no disease
1	27-11-F3	27	pre-treatment	2016-04-25	27	11	11F3	expt sheep	F3	Back left	back foot	left	foot	0	0	0	0	0	0	0	0	0	0	0	0	3	0	0	no disease		0				0	0		0	0	0	0	20569	0	0	0	0	0		scald
1	51-2-F2	51	post-treatment	2016-07-11		2	2F2	expt sheep	F2	Front right	front foot	right	foot	0	0	0	0	0	0	0	0	0	0	0	0			CODD	CODD	CODD only			5			5	codd5	0	0	1	0		0	0	0	0	0		codd
1	13-8-F3	13	pre-treatment	2016-03-07	13	8	8F3	expt sheep	F3	Back left	back foot	left	foot	21.6153	0	0	0	0	1	0	0	0	0	0	0	3	0	0	no disease		1				0	0		0	0	0	0	20520	1.3544	0	0	0	0		codd
1	51-26-F4	51	post-treatment	2016-07-11	51	26	26F4	expt sheep	F4	Back right	back foot	right	foot	0	0	0	1.37168	9.68015	0	0	0	0	0	0	0	3	3	0	no disease		0			0		0		0	0	0	0	20646	0	0	0	0.375056	1.02858	0.566313	no disease
1	29-21-F1	29	pre-treatment	2016-05-03	29	21	21F1	expt sheep	F1	Front left	front foot	left	foot	22.824	0	0	0	0	1	0	0	0	0	0	0	3	0	0	no disease		1	0				0		0	0	0	0	20577	1.37702	0	0	0	0		no disease
1	25-12-F4	25	pre-treatment	2016-04-18	25	12	12F4	expt sheep	F4	Back right	back foot	right	foot	0	0	0	0	0	0	0	0	0	0	0	0	3	1	0	no disease		1			0		0		0	0	0	0	20562	0	0	0	0	0		no disease
1	9-16-F3	9	pre-treatment	2016-02-22	9	16	16F3	expt sheep	F3	Back left	back foot	left	foot	0	0	0	0	5.82265	0	0	0	0	0	0	0	4	0	0	no disease		1					0		0	0	0	0	20506	0	0	0	0	0.833953	0.288	no disease
1	51-23-F2	51	post-treatment	2016-07-11	51	23	23F2	expt sheep	F2	Front right	front foot	right	foot	13.5097	0	0	0	0	0	0	0	0	0	0	0	3	0	0	no disease		0		0			0		0	0	0	0	20646	1.16166	0	0	0	0		no disease
0	29-6-F3	29	pre-treatment	2016-05-03	29	6	6F3	expt sheep	F3	Back left	back foot	left	foot	0	0	0	0	0	0	0	0	0	0	0	0	3	0	0	no disease		1				0	0		0	0	0	0	20577	0	0	0	0	0		no disease
1	43-21-F3	43	post-treatment	2016-06-13	43	21	21F3	expt sheep	F3	Back left	back foot	left	foot	0	0	0	0	0	0	0	0	0	0	0	0	3	0	0	no disease		1				0	0		0	0	0	0	20618	0	0	0	0	0		no disease
1	25-1-F4	25	pre-treatment	2016-04-18	25	1	1F4	expt sheep	F4	Back right	back foot	right	foot	0	0	0	0	0	0	0	0	0	0	0	0	3	0	0	no disease		1			0		0		0	0	0	0	20562	0	0	0	0	0		no disease
1	5-30-F3	5	pre-treatment	2016-02-08	5	30	30F3	expt sheep	F3	Back left	back foot	left	foot	23.8143	0	0	0	0	1	0	0	0	0	0	0	3	0	0	no disease		1				0	0		0	0	0	0	20492	1.3947	0	0	0	0		scald
1	51-27-F3	51	post-treatment	2016-07-11	51	27	27F3	expt sheep	F3	Back left	back foot	left	foot	197.779	0	0	0	12.0371	1	1	0	0	0	1	1	3	1	0	no disease		0				0	0		0	0	0	0	20646	2.29837	0	0	0	1.11518	0.603401	no disease
1	21-22-F1	21	pre-treatment	2016-04-04	21	22	22F1	expt sheep	F1	Front left	front foot	left	foot	0	0	0	0	0	0	0	0	0	0	0	0	3	0	0	no disease		1	0				0		0	0	0	0	20548	0	0	0	0	0		scald
1	9-20-F2	9	pre-treatment	2016-02-22	9	20	20F2	expt sheep	F2	Front right	front foot	right	foot	0	0	0	0	0	0	0	0	0	0	0	0	3	0	0	no disease		1					0		0	0	0	0	20506	0	0	0	0	0		no disease
1	29-8-F2	29	pre-treatment	2016-05-03	29	8	8F2	expt sheep	F2	Front right	front foot	right	foot	0	0	62.7647	0	14.3471	1	0	0	1	0	1	1	3	3	0	no disease		1		0			0		0	0	0	0	20577	0	0	1.80458	0	1.18603	1.41	no disease
1	21-15-F3	21	pre-treatment	2016-04-04	21	15	15F3	expt sheep	F3	Back left	back foot	left	foot	0	20834.6	0	0	4.40727	1	0	1	0	0	0	0	3	3	0	no disease		1				0	0		0	0	0	0	20548	0	4.31881	0	0	0.732978	0.167049	codd
1	9-3-F3	9	pre-treatment	2016-02-22	9	3	3F3	expt sheep	F3	Back left	back foot	left	foot	0	0	0	0	0	0	0	0	0	0	0	0	4	0	0	no disease		1					0		0	0	0	0	20506	0	0	0	0	0		no disease
1	33-1-F4	33	pre-treatment	2016-05-16	33	1	1F4	expt sheep	F4	Back right	back foot	right	foot	0	0	0	0	0	0	0	0	0	0	0	0	3	0	0	no disease		1			0		0		0	0	0	0	20590	0	0	0	0	0		no disease
1	51-29-F1	51	post-treatment	2016-07-11	51	29	29F1	expt sheep	F1	Front left	front foot	left	foot	0	23571	0	0	239.176	1	0	1	0	0	1	1	3	2	footrot	FR		0	0				0		0	1	0	0	20646	0	4.3724	0	0	2.38053	1.9016	footrot
1	25-26-F1	25	pre-treatment	2016-04-18	25	26	26F1	expt sheep	F1	Front left	front foot	left	foot	11.7082	0	199.091	0	35.1845	1	0	0	1	0	1	1	3	0	0	no disease		1	0				0		0	0	0	0	20562	1.10408	0	2.30123	0	1.55852	1.89261	codd
1	5-26-F1	5	pre-treatment	2016-02-08	5	26	26F1	expt sheep	F1	Front left	front foot	left	foot	4.33826	0	40.9643	0	25.0227	1	0	0	1	0	1	1	3	0	0	no disease		1	0				0		0	0	0	0	20492	0.727399	0	1.62288	0	1.41535	1.34234	codd
1	41-7-F4	41	pre-treatment	2016-06-06	41	7	7F4	expt sheep	F4	Back right	back foot	right	foot	21.3397	489.807	0	0	0	1	0	1	0	0	0	0	2	3	scald	ID		0			0		0		1	0	0	0	20611	1.34908	2.69091	0	0	0		scald
1	33-18-F1	33	pre-treatment	2016-05-16	33	18	18F1	expt sheep	F1	Front left	front foot	left	foot	0	49.9956	0	4.58081	0	1	0	0	0	0	0	0	3	0	0	no disease		1	0				0		0	0	0	0	20590	0	1.70753	0	0.746697	0	0.183821	no disease
1	29-15-F3	29	pre-treatment	2016-05-03	29	15	15F3	expt sheep	F3	Back left	back foot	left	foot	26252.1	28582.7	0	0	240.278	1	1	1	0	0	1	1	2	3	0	no disease		1				0	0		0	0	0	0	20577	4.41918	4.45612	0	0	2.38252	1.90359	codd
0	13-3-F1	13	pre-treatment	2016-03-07	13	3	3F1	expt sheep	F1	Front left	front foot	left	foot	35.5647	0	0	2.27924	0	1	0	0	0	0	0	0	3	0	0	no disease		1	0				0		0	0	0	0	20520	1.56306	0	0	0.515774	0	-0.119331	codd
1	41-5-F1	41	pre-treatment	2016-06-06	41	5	5F1	expt sheep	F1	Front left	front foot	left	foot	9270.01	4762.67	109451	3160.37	2604.47	1	1	1	1	1	1	1	2	3	fr&CODD	CODD	CODD & footrot	0	2				2	codd1-4	0	0	1	0	20611	3.96713	3.67794	5.03922	3.49988	3.41589	4.58439	codd
1	9-19-F1	9	pre-treatment	2016-02-22	9	19	19F1	expt sheep	F1	Front left	front foot	left	foot	0	0	0	0	0	0	0	0	0	0	0	0	2	0	0	no disease		1	0				0		0	0	0	0	20506	0	0	0	0	0		no disease
1	41-9-F4	41	pre-treatment	2016-06-06	41	9	9F4	expt sheep	F4	Back right	back foot	right	foot	215.004	0	0	0	8.39257	1	1	0	0	0	0	0	3	0	0	no disease		0			0		0		0	0	0	0	20611	2.33446	0	0	0	0.972784	0.446774	no disease
0	35-17-F4	35	pre-treatment	2016-05-23	35	17	17F4	expt sheep	F4	Back right	back foot	right	foot	0	0	0	0	0	0	0	0	0	0	0	0	3	0	0	no disease		0			0		0		0	0	0	0	20597	0	0	0	0	0		scald
1	19-20-F4	19	pre-treatment	2016-03-28	19	20	20F4	expt sheep	F4	Back right	back foot	right	foot	0	0	0	0	0	0	0	0	0	0	0	0	3	0	0	no disease		0			0		0		0	0	0	0	20541	0	0	0	0	0		no disease
1	41-12-F2	41	pre-treatment	2016-06-06	41	12	12F2	expt sheep	F2	Front right	front foot	right	foot	416.819	55726.4	93451.6	10528	11901.3	1	1	1	1	1	1	1	2	3	fr&CODD	CODD	CODD & footrot	0		1			1	codd1-4	0	0	1	0	20611	2.62099	4.74607	4.97059	4.02239	4.07563	4.58689	codd
1	17-23-F4	17	pre-treatment	2016-03-21		23	23F4	expt sheep	F4	Back right	back foot	right	foot	0	0	0	0	0	0	0	0	0	0	0	0			0	no disease					0		0		0	0	0	0		0	0	0	0	0		codd
0	29-4-F1	29	pre-treatment	2016-05-03	29	4	4F1	expt sheep	F1	Front left	front foot	left	foot	1754.1	2170.53	0	138.23	0	1	1	1	0	1	0	1	3	0	0	no disease		1	0				0		0	0	0	0	20577	3.2443	3.33677	0	2.14373	0	1.66348	codd
1	7-10-F4	7	pre-treatment	2016-02-15		10	10F4	expt sheep	F4	Back right	back foot	right	foot	0	0	0	0	0	0	0	0	0	0	0	0			0	no disease					0		0		0	0	0	0		0	0	0	0	0		codd
1	11-26-F1	11	pre-treatment	2016-02-29	11	26	26F1	expt sheep	F1	Front left	front foot	left	foot	0	0	0	0	0	0	0	0	0	0	0	0	4	0	0	no disease		0	0				0		0	0	0	0	20513	0	0	0	0	0		codd
1	27-2-F3	27	pre-treatment	2016-04-25	27	2	2F3	expt sheep	F3	Back left	back foot	left	foot	337.167	7258.32	0	641.04	131.855	1	1	1	0	1	1	1	3	3	scald	ID		0				0	0		1	0	0	0	20569	2.52913	3.8609	0	2.80756	2.12338	2.411	footrot
0	1-22-F2	1	pre-treatment	2016-01-26	1	22	22F2	expt sheep	F2	Front right	front foot	right	foot	0	0	0	0	0	0	0	0	0	0	0	0	3	0	0	no disease		1		0			0		0	0	0	0	20479	0	0	0	0	0		no disease
1	17-8-F3	17	pre-treatment	2016-03-21	17	8	8F3	expt sheep	F3	Back left	back foot	left	foot	0	0	0	0	0	0	0	0	0	0	0	0	3	0	0	no disease		1				0	0		0	0	0	0	20534	0	0	0	0	0		codd
1	25-3-F4	25	pre-treatment	2016-04-18	25	3	3F4	expt sheep	F4	Back right	back foot	right	foot	0	0	0	0	0	0	0	0	0	0	0	0	3	1	0	no disease		1			0		0		0	0	0	0	20562	0	0	0	0	0		no disease
0	9-27-F2	9	pre-treatment	2016-02-22	9	27	27F2	expt sheep	F2	Front right	front foot	right	foot	0	0	0	0	0	0	0	0	0	0	0	0	4	0	0	no disease		1		0			0		0	0	0	0	20506	0	0	0	0	0		no disease
1	33-6-F1	33	pre-treatment	2016-05-16	33	6	6F1	expt sheep	F1	Front left	front foot	left	foot	17800.8	49608	2639.07	1473.82	219.241	1	1	1	1	1	1	1	3	3	scald	ID		1	0				0		1	0	0	0	20590	4.25046	4.69556	3.42162	3.16874	2.3429	3.15958	codd
1	15-10-F1	15	pre-treatment	2016-03-14	15	10	10F1	expt sheep	F1	Front left	front foot	left	foot	0	0	0	0	0	0	0	0	0	0	0	0	2	0	0	no disease		0	0				0		0	0	0	0	20527	0	0	0	0	0		no disease
1	43-7-F3	43	post-treatment	2016-06-13	43	7	7F3	expt sheep	F3	Back left	back foot	left	foot	46.4443	0	0	6.41726	0	1	1	0	0	0	0	0	3	3	0	no disease		1				0	0		0	0	0	0	20618	1.67618	0	0	0.870244	0	0.330228	scald
1	13-5-F4	13	pre-treatment	2016-03-07	13	5	5F4	expt sheep	F4	Back right	back foot	right	foot	17.086	0	0	0	0	0	0	0	0	0	0	0	3	0	0	no disease		1			0		0		0	0	0	0	20520	1.25734	0	0	0	0		codd
1	25-28-F1	25	pre-treatment	2016-04-18	25	28	28F1	expt sheep	F1	Front left	front foot	left	foot	0	0	27.1391	0	0	1	0	0	0	0	0	0	3	0	0	no disease		1	0				0		0	0	0	0	20562	0	0	1.44931	0	0	0.956473	no disease
1	33-47-F3	33	pre-treatment	2016-05-16	33	47	47F3	source sheep	F3	Back left	back foot	left	foot	4984.52	0	7669.9	1113.89	574.284	1	1	0	1	1	1	1	3	3	CODD	CODD	CODD only	1				3	3	codd1-4	0	0	1	0	20590	3.69771	0	3.88485	3.04723	2.75988	3.49407
1	17-9-F3	17	pre-treatment	2016-03-21	17	9	9F3	expt sheep	F3	Back left	back foot	left	foot	0	0	0	0	7.20071	0	0	0	0	0	0	0	3	0	0	no disease		1					0		0	0	0	0	20534	0	0	0	0	0.913852	0.380254	no disease
1	9-13-F1	9	pre-treatment	2016-02-22	9	13	13F1	expt sheep	F1	Front left	front foot	left	foot	0	0	0	3.13011	0	0	0	0	0	0	0	0	3	0	0	no disease		1	0				0		0	0	0	0	20506	0	0	0	0.615961	0	0.018438	no disease
1	41-27-F2	41	pre-treatment	2016-06-06	41	27	27F2	expt sheep	F2	Front right	front foot	right	foot	0	0	0	0	0	0	0	0	0	0	0	0	3	0	0	no disease		0		0			0		0	0	0	0	20611	0	0	0	0	0		no disease
1	13-5-F2	13	pre-treatment	2016-03-07	13	5	5F2	expt sheep	F2	Front right	front foot	right	foot	59.4492	0	15.1543	0	26.1152	1	1	0	0	0	1	1	3	0	0	no disease		1		0			0		0	0	0	0	20520	1.78139	0	1.20829	0	1.43321	1.13851	codd
1	25-4-F3	25	pre-treatment	2016-04-18	25	4	4F3	expt sheep	F3	Back left	back foot	left	foot	0	0	0	0	0	0	0	0	0	0	0	0	3	0	0	no disease		1				0	0		0	0	0	0	20562	0	0	0	0	0		no disease
0	1-2-F3	1	pre-treatment	2016-01-26	1	2	2F3	expt sheep	F3	Back left	back foot	left	foot	0	0	0	0	0	0	0	0	0	0	0	0	3	0	0	no disease		1				0	0		0	0	0	0	20479	0	0	0	0	0		footrot
1	41-14-F2	41	pre-treatment	2016-06-06	41	14	14F2	expt sheep	F2	Front right	front foot	right	foot	17.6036	0	23.9262	0	0	1	0	0	0	0	0	0	2	3	0	no disease		0		0			0		0	0	0	0	20611	1.2696	0	1.39666	0	0	0.901752	scald
1	43-17-F4	43	post-treatment	2016-06-13	43	17	17F4	expt sheep	F4	Back right	back foot	right	foot	326.839	0	482.545	32.2656	70.544	1	1	0	1	1	1	1	3	3	0	no disease		1			0		0		0	0	0	0	20618	2.51566	0	2.68444	1.52199	1.85457	2.2903	scald
1	9-21-F4	9	pre-treatment	2016-02-22		21	21F4	expt sheep	F4	Back right	back foot	right	foot	33.0395	0	0	0	11.0499	1	0	0	0	0	1	1			0	no disease					0		0		0	0	0	0		1.53198	0	0	0	1.08098	0.566238	no disease
1	23-10-F3	23	pre-treatment	2016-04-11	23	10	10F3	expt sheep	F3	Back left	back foot	left	foot	0	0	0	0	0	0	0	0	0	0	0	0	3	0	0	no disease		0				0	0		0	0	0	0	20555	0	0	0	0	0		no disease
1	33-3-F3	33	pre-treatment	2016-05-16	33	3	3F3	expt sheep	F3	Back left	back foot	left	foot	0	0	53.5743	0	8.05077	1	0	0	1	0	0	1	3	3	0	no disease		1				0	0		0	0	0	0	20590	0	0	1.73699	0	0.956685	1.31264	no disease
1	9-21-F1	9	pre-treatment	2016-02-22	9	21	21F1	expt sheep	F1	Front left	front foot	left	foot	0	0	0	0	6.01898	0	0	0	0	0	0	0	4	0	0	no disease		1	0				0		0	0	0	0	20506	0	0	0	0	0.846274	0.302402	no disease
1	38-3-F4	38	pre-treatment	2016-05-31	38	3	3F4	expt sheep	F4	Back right	back foot	right	foot	45.1295	0	0	23.0002	8.55196	1	1	0	0	0	0	0	3	3	0	no disease		1			0		0		0	0	0	0	20605	1.66398	0	0	1.38021	0.980092	1.02191	no disease
1	35-27-F1	35	pre-treatment	2016-05-23	35	27	27F1	expt sheep	F1	Front left	front foot	left	foot	0	0	0	15.0796	7.67487	0	0	0	0	0	0	0	3	0	0	no disease		0	0				0		0	0	0	0	20597	0	0	0	1.20628	0.938263	0.879945	no disease
1	15-12-F1	15	pre-treatment	2016-03-14	15	12	12F1	expt sheep	F1	Front left	front foot	left	foot	0	0	0	0	17.4583	0	0	0	0	0	1	1	3	0	0	no disease		0	0				0		0	0	0	0	20527	0	0	0	0	1.26619	0.764882	no disease
1	11-5-F1	11	pre-treatment	2016-02-29	11	5	5F1	expt sheep	F1	Front left	front foot	left	foot	23.8736	0	0	0	5.31302	1	0	0	0	0	0	0	3	0	0	no disease		0	0				0		0	0	0	0	20513	1.39574	0	0	0	0.800237	0.24822	codd
1	25-6-F1	25	pre-treatment	2016-04-18	25	6	6F1	expt sheep	F1	Front left	front foot	left	foot	0	44.0622	0	0	10.233	1	0	0	0	0	0	0	3	0	0	no disease		1	0				0		0	0	0	0	20562	0	1.65381	0	0	1.05049	0.532881	codd
1	38-6-F2	38	pre-treatment	2016-05-31	38	6	6F2	expt sheep	F2	Front right	front foot	right	foot	0	0	0	0	8.82877	0	0	0	0	0	0	0	2	3	0	no disease		1		0			0		0	0	0	0	20605	0	0	0	0	0.992499	0.468779	footrot
1	38-18-F1	38	pre-treatment	2016-05-31	38	18	18F1	expt sheep	F1	Front left	front foot	left	foot	43.2004	0	0	0	16.1045	1	0	0	0	0	1	1	3	0	0	no disease		1	0				0		0	0	0	0	20605	1.64543	0	0	0	1.23311	0.729826	no disease
1	21-28-F2	21	pre-treatment	2016-04-04	21	28	28F2	expt sheep	F2	Front right	front foot	right	foot	0	0	0	0	0	0	0	0	0	0	0	0	4	0	overgrown	other		1		0			0		0	0	0	1	20548	0	0	0	0	0		footrot
1	19-17-F2	19	pre-treatment	2016-03-28	19	17	17F2	expt sheep	F2	Front right	front foot	right	foot	0	0	80.3924	3.83995	4.69777	1	0	0	1	0	0	1	4	0	0	no disease		0		0			0		0	0	0	0	20541	0	0	1.91058	0.684841	0.755705	1.47193	codd
1	38-22-F3	38	pre-treatment	2016-05-31	38	22	22F3	expt sheep	F3	Back left	back foot	left	foot	0	0	0	0	0	0	0	0	0	0	0	0	3	0	0	no disease		1				0	0		0	0	0	0	20605	0	0	0	0	0		scald
1	31-5-F4	31	pre-treatment	2016-05-09	31	5	5F4	expt sheep	F4	Back right	back foot	right	foot	77.3532	2319.76	222.901	5.6115	8.94121	1	1	1	1	0	0	1	3	3	scald	ID		0			0		0		1	0	0	0	20583	1.89406	3.36563	2.35006	0.8203	0.997439	1.89846	codd
1	25-17-F3	25	pre-treatment	2016-04-18	25	17	17F3	expt sheep	F3	Back left	back foot	left	foot	0	0	0	0	0	0	0	0	0	0	0	0	3	0	0	no disease		1				0	0		0	0	0	0	20562	0	0	0	0	0		scald
1	38-3-F3	38	pre-treatment	2016-05-31	38	3	3F3	expt sheep	F3	Back left	back foot	left	foot	781.202	0	0	9.00647	0	1	1	0	0	0	0	0	3	3	0	no disease		1				0	0		0	0	0	0	20605	2.89332	0	0	1.00028	0	0.477434	no disease
0	9-7-F1	9	pre-treatment	2016-02-22	9	7	7F1	expt sheep	F1	Front left	front foot	left	foot	0	0	0	0	0	0	0	0	0	0	0	0	3	0	0	no disease		1	0				0		0	0	0	0	20506	0	0	0	0	0		codd
1	41-9-F3	41	pre-treatment	2016-06-06	41	9	9F3	expt sheep	F3	Back left	back foot	left	foot	67.6096	0	58.3832	11.809	87.5222	1	1	0	1	0	1	1	3	0	0	no disease		0				0	0		0	0	0	0	20611	1.83638	0	1.77366	1.10751	1.94705	1.72075	no disease
1	9-5-F2	9	pre-treatment	2016-02-22	9	5	5F2	expt sheep	F2	Front right	front foot	right	foot	0	0	0	0	0	0	0	0	0	0	0	0	3	0	0	no disease		1					0		0	0	0	0	20506	0	0	0	0	0		codd
1	9-27-F4	9	pre-treatment	2016-02-22		27	27F4	expt sheep	F4	Back right	back foot	right	foot	0	0	0	0	0	0	0	0	0	0	0	0			0	no disease					0		0		0	0	0	0		0	0	0	0	0		scald
1	41-14-F4	41	pre-treatment	2016-06-06	41	14	14F4	expt sheep	F4	Back right	back foot	right	foot	8081.68	9019.56	0	632.028	235.263	1	1	1	0	1	1	1	2	3	CODD	CODD	CODD only	0			0		0	codd1-4	0	0	1	0	20611	3.90756	3.95523	0	2.80142	2.3734	2.46104	codd
1	33-15-F3	33	pre-treatment	2016-05-16	33	15	15F3	expt sheep	F3	Back left	back foot	left	foot	870.842	18368.5	117.314	1503.68	6430.71	1	1	1	1	1	1	1	2	3	fr&CODD	CODD	CODD & footrot	1				1	1	codd1-4	0	0	1	0	20590	2.94044	4.2641	2.07304	3.17744	3.80833	3.42877	codd
1	38-18-F4	38	pre-treatment	2016-05-31	38	18	18F4	expt sheep	F4	Back right	back foot	right	foot	43.7817	0	0	24.4989	9.74101	1	1	0	0	0	0	0	3	0	0	no disease		1			0		0		0	0	0	0	20605	1.6511	0	0	1.40652	1.03105	1.05741	no disease
1	17-1-F1	17	pre-treatment	2016-03-21	17	1	1F1	expt sheep	F1	Front left	front foot	left	foot	27.9573	0	0	0	17.0253	1	0	0	0	0	1	1	3	0	0	no disease		1	0				0		0	0	0	0	20534	1.46176	0	0	0	1.25588	0.753974	no disease
1	27-20-F2	27	pre-treatment	2016-04-25	27	20	20F2	expt sheep	F2	Front right	front foot	right	foot	18.8255	0	0	0	0	0	0	0	0	0	0	0	3	0	0	no disease		0		0			0		0	0	0	0	20569	1.29722	0	0	0	0		no disease
1	43-2-F3	43	post-treatment	2016-06-13	43	2	2F3	expt sheep	F3	Back left	back foot	left	foot	0	2881.24	0	38.5822	0	1	0	1	0	1	0	1	3	2	footrot	FR		1				0	0		0	1	0	0	20618	0	3.45973	0	1.5975	0	1.10927	footrot
1	47-27-F3	47	post-treatment	2016-06-27	47	27	27F3	expt sheep	F3	Back left	back foot	left	foot	0	0	0	0	0	0	0	0	0	0	0	0	3	0	0	no disease		1				0	0		0	0	0	0	20632	0	0	0	0	0		no disease
1	13-21-F4	13	pre-treatment	2016-03-07	13	21	21F4	expt sheep	F4	Back right	back foot	right	foot	53.0867	0	0	0	0	1	1	0	0	0	0	0	3	0	0	no disease		1			0		0		0	0	0	0	20520	1.73309	0	0	0	0		no disease
1	23-13-F3	23	pre-treatment	2016-04-11	23	13	13F3	expt sheep	F3	Back left	back foot	left	foot	9.90573	0	0	1.96984	0	0	0	0	0	0	0	0	3	0	0	no disease		0				0	0		0	0	0	0	20555	1.03765	0	0	0.472733	0	-0.18269	no disease
1	43-11-F1	43	post-treatment	2016-06-13	43	11	11F1	expt sheep	F1	Front left	front foot	left	foot	0	3928.19	0	0	9.12463	1	0	1	0	0	0	0	2	1	scald	ID		1	0				0		1	0	0	0	20618	0	3.5943	0	0	1.00538	0.483094	scald
1	19-14-F3	19	pre-treatment	2016-03-28	19	14	14F3	expt sheep	F3	Back left	back foot	left	foot	0	0	0	0	6.38029	0	0	0	0	0	0	0	3	0	0	no disease		0				0	0		0	0	0	0	20541	0	0	0	0	0.868073	0.327719	codd
0	3-38-F3	3	pre-treatment	2016-02-02	3	38	38F3	source sheep	F3	Back left	back foot	left	foot	0	0	124.893	2.73468	8.03125	1	0	0	1	0	0	1	2	3	0	no disease		1				0	0		0	0	0	0	20486	0	0	2.1	0.572253	0.955748	1.65533
1	11-8-F2	11	pre-treatment	2016-02-29	11	8	8F2	expt sheep	F2	Front right	front foot	right	foot	0	0	0	0	0	0	0	0	0	0	0	0	3	0	0	no disease		0		0			0		0	0	0	0	20513	0	0	0	0	0		no disease
1	43-4-F3	43	post-treatment	2016-06-13	43	4	4F3	expt sheep	F3	Back left	back foot	left	foot	0	0	0	0	0	0	0	0	0	0	0	0	3	3	0	no disease		1				0	0		0	0	0	0	20618	0	0	0	0	0		no disease
1	51-2-F4	51	post-treatment	2016-07-11	51	2	2F4	expt sheep	F4	Back right	back foot	right	foot	0	14473.2	0	0	0	1	0	1	0	0	0	0	2	1	scald	ID		0			0		0		1	0	0	0	20646	0	4.16059	0	0	0		footrot
1	23-7-F3	23	pre-treatment	2016-04-11	23	7	7F3	expt sheep	F3	Back left	back foot	left	foot	0	0	0	0	0	0	0	0	0	0	0	0	3	2	0	no disease		0				0	0		0	0	0	0	20555	0	0	0	0	0		scald
1	27-7-F3	27	pre-treatment	2016-04-25	27	7	7F3	expt sheep	F3	Back left	back foot	left	foot	0	97.2504	0	0	0	1	0	1	0	0	0	0	3	3	0	no disease		0				0	0		0	0	0	0	20569	0	1.99233	0	0	0		scald
1	47-4-F2	47	post-treatment	2016-06-27	47	4	4F2	expt sheep	F2	Front right	front foot	right	foot	0	0	0	0	0	0	0	0	0	0	0	0	3	1	0	no disease		1		0			0		0	0	0	0	20632	0	0	0	0	0		scald
1	5-21-F4	5	pre-treatment	2016-02-08	5	21	21F4	expt sheep	F4	Back right	back foot	right	foot	0	0	0	0	0	0	0	0	0	0	0	0	3	0	0	no disease		1			0		0		0	0	0	0	20492	0	0	0	0	0		no disease
1	51-10-F3	51	post-treatment	2016-07-11	51	10	10F3	expt sheep	F3	Back left	back foot	left	foot	2.13686	0	0	0	0	0	0	0	0	0	0	0	2	0	0	no disease		0				0	0		0	0	0	0	20646	0.496495	0	0	0	0		no disease
1	11-20-F2	11	pre-treatment	2016-02-29	11	20	20F2	expt sheep	F2	Front right	front foot	right	foot	0	0	0	0	15.465	0	0	0	0	0	1	1	3	0	0	no disease		0		0			0		0	0	0	0	20513	0	0	0	0	1.21656	0.712228	no disease
1	23-11-F2	23	pre-treatment	2016-04-11	23	11	11F2	expt sheep	F2	Front right	front foot	right	foot	0	0	0	0	0	0	0	0	0	0	0	0	3	0	0	no disease		0		0			0		0	0	0	0	20555	0	0	0	0	0		scald
1	43-25-F2	43	post-treatment	2016-06-13	43	25	25F2	expt sheep	F2	Front right	front foot	right	foot	21.3234	0	0	0	4.36421	1	0	0	0	0	0	0	3	0	0	no disease		1		0			0		0	0	0	0	20618	1.34876	0	0	0	0.729506	0.162785	no disease
1	7-3-F3	7	pre-treatment	2016-02-15	7	3	3F3	expt sheep	F3	Back left	back foot	left	foot	72.1955	0	0	4.42279	0	1	1	0	0	0	0	0	2	0	0	no disease		0					0		0	0	0	0	20499	1.86448	0	0	0.734223	0	0.168575	no disease
1	27-3-F4	27	pre-treatment	2016-04-25	27	3	3F4	expt sheep	F4	Back right	back foot	right	foot	0	0	0	0	0	0	0	0	0	0	0	0	4	2	0	no disease		0			0		0		0	0	0	0	20569	0	0	0	0	0		no disease
1	47-30-F4	47	post-treatment	2016-06-27	47	30	30F4	expt sheep	F4	Back right	back foot	right	foot	0	0	0	0	0	0	0	0	0	0	0	0	3	1	0	no disease		1			0		0		0	0	0	0	20632	0	0	0	0	0		scald
1	9-9-F2	9	pre-treatment	2016-02-22	9	9	9F2	expt sheep	F2	Front right	front foot	right	foot	0	0	0	0	0	0	0	0	0	0	0	0	3	0	0	no disease		1		0			0		0	0	0	0	20506	0	0	0	0	0		codd
0	3-40-F3	3	pre-treatment	2016-02-03	3	40	40F3	source sheep	F3	Back left	back foot	left	foot	0	0	0	0	564.066	1	0	0	0	0	1	1	1	3	CODD	CODD	CODD only	1				2	2	codd1-4	0	0	1	0	20487	0	0	0	0	2.7521	2.27421
1	27-14-F4	27	pre-treatment	2016-04-25	27	14	14F4	expt sheep	F4	Back right	back foot	right	foot	4069.23	10854.3	0	33.4091	3.97894	1	1	1	0	1	0	1	3	1	scald	ID		0			0		0		1	0	0	0	20569	3.60962	4.03564	0	1.53667	0.697137	1.09561	codd
1	23-22-F4	23	pre-treatment	2016-04-11	23	22	22F4	expt sheep	F4	Back right	back foot	right	foot	0	0	0	0	4.06131	0	0	0	0	0	0	0	4	0	0	no disease		0			0		0		0	0	0	0	20555	0	0	0	0	0.704263	0.131545	no disease
1	43-15-F1	43	post-treatment	2016-06-13	43	15	15F1	expt sheep	F1	Front left	front foot	left	foot	0	243633	8246.87	3073.46	26631.1	1	0	1	1	1	1	1	2	3	fr&CODD	CODD	CODD & footrot	1	1				1	codd1-4	0	0	1	0	20618	0	5.38674	3.91634	3.48777	4.42541	4.10211	codd
1	13-16-F4	13	pre-treatment	2016-03-07	13	16	16F4	expt sheep	F4	Back right	back foot	right	foot	37.8577	0	0	0	0	1	0	0	0	0	0	0	3	0	0	no disease		1			0		0		0	0	0	0	20520	1.58948	0	0	0	0		no disease
1	25-16-F1	25	pre-treatment	2016-04-18	25	16	16F1	expt sheep	F1	Front left	front foot	left	foot	0	0	0	0	0	0	0	0	0	0	0	0	3	0	0	no disease		1	0				0		0	0	0	0	20562	0	0	0	0	0		no disease
1	7-3-F1	7	pre-treatment	2016-02-15	7	3	3F1	expt sheep	F1	Front left	front foot	left	foot	0	0	0	0	0	0	0	0	0	0	0	0	2	0	0	no disease		0	0				0		0	0	0	0	20499	0	0	0	0	0		codd
1	47-27-F1	47	post-treatment	2016-06-27	47	27	27F1	expt sheep	F1	Front left	front foot	left	foot	0	0	0	0	0	0	0	0	0	0	0	0	3	0	0	no disease		1	0				0		0	0	0	0	20632	0	0	0	0	0		no disease
1	41-22-F3	41	pre-treatment	2016-06-06	41	22	22F3	expt sheep	F3	Back left	back foot	left	foot	23.8644	0	0	5.19469	0	1	0	0	0	0	0	0	3	0	scald	ID		0				0	0		1	0	0	0	20611	1.39558	0	0	0.792019	0	0.238438	scald
1	51-8-F4	51	post-treatment	2016-07-11	51	8	8F4	expt sheep	F4	Back right	back foot	right	foot	0	0	0	0	0	0	0	0	0	0	0	0	3	0	0	no disease		0			0		0		0	0	0	0	20646	0	0	0	0	0		scald
1	38-13-F3	38	pre-treatment	2016-05-31	38	13	13F3	expt sheep	F3	Back left	back foot	left	foot	25.3372	0	19.7655	51.0513	5.06228	1	0	0	0	1	0	1	3	0	0	no disease		1				0	0		0	0	0	0	20605	1.42057	0	1.31734	1.71643	0.782636	1.403	no disease
1	31-12-F3	31	pre-treatment	2016-05-09	31	12	12F3	expt sheep	F3	Back left	back foot	left	foot	8129.18	2404.33	28386.9	953.38	259.749	1	1	1	1	1	1	1	3	3	footrot	FR		0				0	0		0	1	0	0	20583	3.9101	3.38117	4.45313	2.97972	2.41622	3.99417	codd
1	13-11-F2	13	pre-treatment	2016-03-07	13	11	11F2	expt sheep	F2	Front right	front foot	right	foot	16.7767	0	7.19321	0	0	0	0	0	0	0	0	0	3	0	0	no disease		1		0			0		0	0	0	0	20520	1.24985	0	0.913454	0	0	0.379802	scald
1	19-27-F3	19	pre-treatment	2016-03-28	19	27	27F3	expt sheep	F3	Back left	back foot	left	foot	44.5463	0	0	0	0	1	1	0	0	0	0	0	4	0	0	no disease		0				0	0		0	0	0	0	20541	1.65845	0	0	0	0		no disease
1	21-20-F4	21	pre-treatment	2016-04-04	21	20	20F4	expt sheep	F4	Back right	back foot	right	foot	0	64.9835	0	0	4.06458	1	0	1	0	0	0	0	3	0	0	no disease		1			0		0		0	0	0	0	20548	0	1.81944	0	0	0.704543	0.131894	no disease
1	17-20-F1	17	pre-treatment	2016-03-21	17	20	20F1	expt sheep	F1	Front left	front foot	left	foot	0	0	0	0	0	0	0	0	0	0	0	0	4	0	0	no disease		1	0				0		0	0	0	0	20534	0	0	0	0	0		no disease
1	33-6-F4	33	pre-treatment	2016-05-16	33	6	6F4	expt sheep	F4	Back right	back foot	right	foot	11.3454	0	50.7977	0	0	1	0	0	1	0	0	1	3	3	0	no disease		1			0		0		0	0	0	0	20590	1.09151	0	1.71431	0	0	1.22872	no disease
1	38-23-F2	38	pre-treatment	2016-05-31	38	23	23F2	expt sheep	F2	Front right	front foot	right	foot	0	0	0	0	0	0	0	0	0	0	0	0	2	3	0	no disease		1		0			0		0	0	0	0	20605	0	0	0	0	0		no disease
1	41-30-F4	41	pre-treatment	2016-06-06	41	30	30F4	expt sheep	F4	Back right	back foot	right	foot	102.248	0	39.9668	47.8446	0	1	1	0	1	1	0	1	3	0	scald	ID		0			0		0		1	0	0	0	20611	2.01388	0	1.61243	1.68882	0	1.46643	scald
1	43-15-F3	43	post-treatment	2016-06-13	43	15	15F3	expt sheep	F3	Back left	back foot	left	foot	28.5113	102068	117.426	4.96021	1261.02	1	0	1	1	0	1	1	2	3	footrot	FR		1				0	0		0	1	0	0	20618	1.46999	5.00889	2.07345	0.775261	3.10107	2.66383	codd
1	17-27-F3	17	pre-treatment	2016-03-21	17	27	27F3	expt sheep	F3	Back left	back foot	left	foot	92.7974	0	14.4192	4.56524	8.81867	1	1	0	0	0	0	0	4	0	0	no disease		1				0	0		0	0	0	0	20534	1.97219	0	1.18806	0.745484	0.992053	0.966973	no disease
0	25-4-F2	25	pre-treatment	2016-04-18	25	4	4F2	expt sheep	F2	Front right	front foot	right	foot	0	199.193	0	0	0	1	0	1	0	0	0	0	3	0	0	no disease		1		0			0		0	0	0	0	20562	0	2.30145	0	0	0		scald
1	47-26-F4	47	post-treatment	2016-06-27	47	26	26F4	expt sheep	F4	Back right	back foot	right	foot	0	0	0	0	0	0	0	0	0	0	0	0	3	0	0	no disease		1			0		0		0	0	0	0	20632	0	0	0	0	0		no disease
1	21-19-F1	21	pre-treatment	2016-04-04	21	19	19F1	expt sheep	F1	Front left	front foot	left	foot	0	89.3972	0	0	0	1	0	1	0	0	0	0	2	0	0	no disease		1	0				0		0	0	0	0	20548	0	1.95615	0	0	0		no disease
1	47-8-F1	47	post-treatment	2016-06-27	47	8	8F1	expt sheep	F1	Front left	front foot	left	foot	0	0	0	0	0	0	0	0	0	0	0	0	3	0	0	no disease		1	0				0		0	0	0	0	20632	0	0	0	0	0		no disease
0	35-22-F2	35	pre-treatment	2016-05-23	35	22	22F2	expt sheep	F2	Front right	front foot	right	foot	0	0	0	0	0	0	0	0	0	0	0	0	3	0	0	no disease		0		0			0		0	0	0	0	20597	0	0	0	0	0		no disease
1	13-23-F3	13	pre-treatment	2016-03-07	13	23	23F3	expt sheep	F3	Back left	back foot	left	foot	21.8907	0	0	0	0	1	0	0	0	0	0	0	3	0	0	no disease		1				0	0		0	0	0	0	20520	1.35966	0	0	0	0		codd
1	13-16-F3	13	pre-treatment	2016-03-07	13	16	16F3	expt sheep	F3	Back left	back foot	left	foot	12.1003	0	0	0	0	0	0	0	0	0	0	0	3	0	0	no disease		1				0	0		0	0	0	0	20520	1.11728	0	0	0	0		no disease
1	13-9-F4	13	pre-treatment	2016-03-07	13	9	9F4	expt sheep	F4	Back right	back foot	right	foot	14.4025	0	0	6.03077	0	0	0	0	0	0	0	0	3	0	0	no disease		1			0		0		0	0	0	0	20520	1.18759	0	0	0.847003	0	0.303252	no disease
1	41-3-F3	41	pre-treatment	2016-06-06	41	3	3F3	expt sheep	F3	Back left	back foot	left	foot	187441	0	29.7911	1.49445	4.17918	1	1	0	0	0	0	0	2	3	0	no disease		0				0	0		0	0	0	0	20611	5.27287	0	1.48842	0.396974	0.714261	1.07267	no disease
1	38-13-F1	38	pre-treatment	2016-05-31	38	13	13F1	expt sheep	F1	Front left	front foot	left	foot	0	0	48.1668	7.14672	5.91277	1	0	0	1	0	0	1	3	0	0	no disease		1	0				0		0	0	0	0	20605	0	0	1.69167	0.910983	0.839652	1.30982	no disease
1	7-13-F4	7	pre-treatment	2016-02-15		13	13F4	expt sheep	F4	Back right	back foot	right	foot	0	0	0	0	0	0	0	0	0	0	0	0			0	no disease					0		0		0	0	0	0	20499	0	0	0	0	0		no disease
1	21-26-F1	21	pre-treatment	2016-04-04	21	26	26F1	expt sheep	F1	Front left	front foot	left	foot	0	0	0	0	9.54409	0	0	0	0	0	0	0	4	0	0	no disease		1	0				0		0	0	0	0	20548	0	0	0	0	1.02301	0.502613	codd
1	31-8-F1	31	pre-treatment	2016-05-09	31	8	8F1	expt sheep	F1	Front left	front foot	left	foot	0	0	0	0	0	0	0	0	0	0	0	0	2	3	0	no disease		0	0				0		0	0	0	0	20583	0	0	0	0	0		no disease
1	23-7-F2	23	pre-treatment	2016-04-11	23	7	7F2	expt sheep	F2	Front right	front foot	right	foot	7371.6	10651.3	822.744	963.428	1118.15	1	1	1	1	1	1	1	3	2	scald	ID		0		0			0		1	0	0	0	20555	3.86762	4.02744	2.91579	2.98427	3.04889	2.98592	codd
1	21-10-F2	21	pre-treatment	2016-04-04	21	10	10F2	expt sheep	F2	Front right	front foot	right	foot	0	0	0	0	0	0	0	0	0	0	0	0	3	0	0	no disease		1		0			0		0	0	0	0	20548	0	0	0	0	0		footrot
1	31-25-F1	31	pre-treatment	2016-05-09	31	25	25F1	expt sheep	F1	Front left	front foot	left	foot	0	0	0	0	0	0	0	0	0	0	0	0	2	0	0	no disease		0	0				0		0	0	0	0	20583	0	0	0	0	0		no disease
1	47-6-F4	47	post-treatment	2016-06-27	47	6	6F4	expt sheep	F4	Back right	back foot	right	foot	77.9493	0	0	0	0	1	1	0	0	0	0	0	2	3	0	no disease		1			0		0		0	0	0	0	20632	1.89735	0	0	0	0		no disease
1	31-29-F3	31	pre-treatment	2016-05-09	31	29	29F3	expt sheep	F3	Back left	back foot	left	foot	14.4413	0	0	0	0	0	0	0	0	0	0	0	3	0	0	no disease		0				0	0		0	0	0	0	20583	1.18868	0	0	0	0		no disease
0	15-25-F4	15	pre-treatment	2016-03-14	15	25	25F4	expt sheep	F4	Back right	back foot	right	foot	0	0	0	0	4.64545	0	0	0	0	0	0	0	4	0	0	no disease		0			0		0		0	0	0	0	20527	0	0	0	0	0.751698	0.189906	no disease
0	17-13-F2	17	pre-treatment	2016-03-21	17	13	13F2	expt sheep	F2	Front right	front foot	right	foot	0	0	0	0	0	0	0	0	0	0	0	0	3	0	0	no disease		1		0			0		0	0	0	0	20534	0	0	0	0	0		no disease
1	5-20-F4	5	pre-treatment	2016-02-08	5	20	20F4	expt sheep	F4	Back right	back foot	right	foot	0	0	0	0	0	0	0	0	0	0	0	0	3	0	0	no disease		1			0		0		0	0	0	0	20492	0	0	0	0	0		no disease
1	17-15-F1	17	pre-treatment	2016-03-21	17	15	15F1	expt sheep	F1	Front left	front foot	left	foot	21.7284	12239.3	0	0	165.588	1	0	1	0	0	1	1	3	2	scald	ID		1	0				0		1	0	0	0	20534	1.35657	4.08779	0	0	2.22164	1.74191	codd
1	9-8-F3	9	pre-treatment	2016-02-22	9	8	8F3	expt sheep	F3	Back left	back foot	left	foot	0	0	0	0.744283	0	0	0	0	0	0	0	0	3	0	0	no disease		1					0		0	0	0	0	20506	0	0	0	0.241617	0	-0.605383	codd
1	21-16-F4	21	pre-treatment	2016-04-04	21	16	16F4	expt sheep	F4	Back right	back foot	right	foot	42.8886	0	0	2.45247	14.7072	1	0	0	0	0	1	1	4	0	0	no disease		1			0		0		0	0	0	0	20548	1.64235	0	0	0.53813	1.1961	0.757387	no disease
1	13-22-F2	13	pre-treatment	2016-03-07	13	22	22F2	expt sheep	F2	Front right	front foot	right	foot	0	0	0	0	0	0	0	0	0	0	0	0	3	0	0	no disease		1		0			0		0	0	0	0	20520	0	0	0	0	0		no disease
1	25-20-F3	25	pre-treatment	2016-04-18	25	20	20F3	expt sheep	F3	Back left	back foot	left	foot	0	0	0	0	0	0	0	0	0	0	0	0	3	0	0	no disease		1				0	0		0	0	0	0	20562	0	0	0	0	0		no disease
0	1-21-F1	1	pre-treatment	2016-01-26	1	21	21F1	expt sheep	F1	Front left	front foot	left	foot	0	0	0	0	0	0	0	0	0	0	0	0	3	0	0	no disease		1	0				0		0	0	0	0	20479	0	0	0	0	0		no disease
1	51-30-F3	51	post-treatment	2016-07-11	51	30	30F3	expt sheep	F3	Back left	back foot	left	foot	71.0516	0	0	9.59545	101.798	1	1	0	0	0	1	1	3	3	0	no disease		0				0	0		0	0	0	0	20646	1.85764	0	0	1.02512	2.01198	1.56974	scald
1	29-8-F4	29	pre-treatment	2016-05-03	29	8	8F4	expt sheep	F4	Back right	back foot	right	foot	4189.8	2239.51	1146.52	3387.24	76.1114	1	1	1	1	1	1	1	3	3	scald	ID		1			0		0		1	0	0	0	20577	3.6223	3.35035	3.05976	3.52997	1.88712	3.18657	scald
1	15-8-F3	15	pre-treatment	2016-03-14	15	8	8F3	expt sheep	F3	Back left	back foot	left	foot	0	0	0	0	0	0	0	0	0	0	0	0	3	0	0	no disease		0				0	0		0	0	0	0	20527	0	0	0	0	0		codd
1	43-11-F3	43	post-treatment	2016-06-13	43	11	11F3	expt sheep	F3	Back left	back foot	left	foot	34.8515	15424.5	0	0	0	1	0	1	0	0	0	0	2	1	0	no disease		1				0	0		0	0	0	0	20618	1.55451	4.18824	0	0	0		scald
1	9-19-F3	9	pre-treatment	2016-02-22	9	19	19F3	expt sheep	F3	Back left	back foot	left	foot	0	0	0	0	5.15387	0	0	0	0	0	0	0	2	0	0	no disease		1					0		0	0	0	0	20506	0	0	0	0	0.789148	0.235012	no disease
1	47-17-F1	47	post-treatment	2016-06-27	47	17	17F1	expt sheep	F1	Front left	front foot	left	foot	0	0	0	0	0	0	0	0	0	0	0	0	2	2	0	no disease		1	0				0		0	0	0	0	20632	0	0	0	0	0		no disease
1	9-29-F3	9	pre-treatment	2016-02-22	9	29	29F3	expt sheep	F3	Back left	back foot	left	foot	0	0	0	0	0	0	0	0	0	0	0	0	4	0	0	no disease		1					0		0	0	0	0	20506	0	0	0	0	0		no disease
1	11-14-F1	11	pre-treatment	2016-02-29	11	14	14F1	expt sheep	F1	Front left	front foot	left	foot	9.88952	0	0	0	0	0	0	0	0	0	0	0	3	0	0	no disease		0	0				0		0	0	0	0	20513	1.03701	0	0	0	0		scald
1	9-4-F2	9	pre-treatment	2016-02-22	9	4	4F2	expt sheep	F2	Front right	front foot	right	foot	0	0	0	0	0	0	0	0	0	0	0	0	3	0	0	no disease		1		0			0		0	0	0	0	20506	0	0	0	0	0		scald
0	3-32-F2	3	pre-treatment	2016-02-02	3	32	32F2	source sheep	F2	Front right	front foot	right	foot	0	0	43.1979	0	0	1	0	0	1	0	0	1	2	3	0	no disease		1		0			0		0	0	0	0	20486	0	0	1.6454	0	0	1.15834
1	13-1-F1	13	pre-treatment	2016-03-07	13	1	1F1	expt sheep	F1	Front left	front foot	left	foot	0	0	0	0	0	0	0	0	0	0	0	0	3	0	0	no disease		1	0				0		0	0	0	0	20520	0	0	0	0	0		no disease
1	51-9-F2	51	post-treatment	2016-07-11	51	9	9F2	expt sheep	F2	Front right	front foot	right	foot	86.762	0	0	0	0	1	1	0	0	0	0	0	3	0	0	no disease		0		0			0		0	0	0	0	20646	1.94331	0	0	0	0		codd
1	15-1-F1	15	pre-treatment	2016-03-14	15	1	1F1	expt sheep	F1	Front left	front foot	left	foot	0	0	0	0	5.9089	0	0	0	0	0	0	0	3	0	0	no disease		0	0				0		0	0	0	0	20527	0	0	0	0	0.839409	0.294386	no disease
1	21-25-F2	21	pre-treatment	2016-04-04	21	25	25F2	expt sheep	F2	Front right	front foot	right	foot	0	0	0	0	5.89295	0	0	0	0	0	0	0	4	0	0	no disease		1		0			0		0	0	0	0	20548	0	0	0	0	0.838405	0.293212	no disease
1	43-29-F3	43	post-treatment	2016-06-13	43	29	29F3	expt sheep	F3	Back left	back foot	left	foot	0	46.5684	0	0	0	1	0	0	0	0	0	0	3	1	0	no disease		1				0	0		0	0	0	0	20618	0	1.67732	0	0	0		no disease
1	7-7-F1	7	pre-treatment	2016-02-15	7	7	7F1	expt sheep	F1	Front left	front foot	left	foot	8.53681	0	75.2935	31.03	22.7989	1	0	0	1	1	1	1	3	0	0	no disease		0	0				0		0	0	0	0	20499	0.979403	0	1.88249	1.50556	1.37656	1.63388	codd
1	3-36-F3	3	pre-treatment	2016-02-02	3	36	36F3	source sheep	F3	Back left	back foot	left	foot	17.358	0	0	3.43673	5.73797	0	0	0	0	0	0	0	3	3	WL	other		1				0	0		0	0	0	1	20486	1.26382	0	0	0.647063	0.828529	0.485471
1	5-25-F1	5	pre-treatment	2016-02-08	5	25	25F1	expt sheep	F1	Front left	front foot	left	foot	0	0	0	0	0	0	0	0	0	0	0	0	3	0	0	no disease		1	0				0		0	0	0	0	20492	0	0	0	0	0		no disease
1	9-18-F2	9	pre-treatment	2016-02-22	9	18	18F2	expt sheep	F2	Front right	front foot	right	foot	0	0	0	0	0	0	0	0	0	0	0	0	3	0	0	no disease		1		0			0		0	0	0	0	20506	0	0	0	0	0		no disease
1	17-3-F1	17	pre-treatment	2016-03-21	17	3	3F1	expt sheep	F1	Front left	front foot	left	foot	0	0	0	0	2.97015	0	0	0	0	0	0	0	4	0	0	no disease		1	0				0		0	0	0	0	20534	0	0	0	0	0.598807	-0.00434262	codd
1	27-5-F3	27	pre-treatment	2016-04-25	27	5	5F3	expt sheep	F3	Back left	back foot	left	foot	0	0	0	0	0	0	0	0	0	0	0	0	3	1	0	no disease		0				0	0		0	0	0	0	20569	0	0	0	0	0		codd
1	33-2-F2	33	pre-treatment	2016-05-16	33	2	2F2	expt sheep	F2	Front right	front foot	right	foot	18364.6	2898.85	81452.3	6023.47	557.958	1	1	1	1	1	1	1	3	3	fr&CODD	CODD	CODD & footrot	1		2			2	codd1-4	0	0	1	0	20590	4.264	3.46238	4.91091	3.77992	2.74738	4.46753	codd
1	41-13-F1	41	pre-treatment	2016-06-06	41	13	13F1	expt sheep	F1	Front left	front foot	left	foot	0	0	0	0	10.4776	0	0	0	0	0	1	1	2	0	0	no disease		0	0				0		0	0	0	0	20611	0	0	0	0	1.05985	0.543139	no disease
1	51-13-F3	51	post-treatment	2016-07-11	51	13	13F3	expt sheep	F3	Back left	back foot	left	foot	0	0	0	0	0	0	0	0	0	0	0	0	2	0	0	no disease		0				0	0		0	0	0	0	20646	0	0	0	0	0		no disease
1	41-8-F2	41	pre-treatment	2016-06-06	41	8	8F2	expt sheep	F2	Front right	front foot	right	foot	0	0	0	0	4.83128	0	0	0	0	0	0	0	2	3	0	no disease		0		0			0		0	0	0	0	20611	0	0	0	0	0.765764	0.206941	no disease
1	27-26-F1	27	pre-treatment	2016-04-25	27	26	26F1	expt sheep	F1	Front left	front foot	left	foot	0	0	0	0	0	0	0	0	0	0	0	0	3	0	0	no disease		0	0				0		0	0	0	0	20569	0	0	0	0	0		codd
1	7-6-F2	7	pre-treatment	2016-02-15	7	6	6F2	expt sheep	F2	Front right	front foot	right	foot	6.18255	0	0	0	28.6971	1	0	0	0	0	1	1	2	0	fr&scald	FR		0		0			0		0	1	0	0	20499	0.856279	0	0	0	1.47271	0.980717	footrot
1	29-8-F3	29	pre-treatment	2016-05-03	29	8	8F3	expt sheep	F3	Back left	back foot	left	foot	260520	40921.9	1.59393e+06	63374.7	216324	1	1	1	1	1	1	1	3	3	footrot	FR		1				0	0		0	1	0	0	20577	5.41584	4.61197	6.20247	4.80192	5.33511	5.79556	codd
1	25-23-F3	25	pre-treatment	2016-04-18	25	23	23F3	expt sheep	F3	Back left	back foot	left	foot	11.6999	0	0	0	0	0	0	0	0	0	0	0	2	3	CODD	CODD	CODD only	1				5	5	codd5	0	0	1	0	20562	1.1038	0	0	0	0		codd
1	25-26-F4	25	pre-treatment	2016-04-18	25	26	26F4	expt sheep	F4	Back right	back foot	right	foot	0	0	0	9.01849	0	0	0	0	0	0	0	0	3	0	0	no disease		1			0		0		0	0	0	0	20562	0	0	0	1.0008	0	0.478012	no disease
1	47-14-F1	47	post-treatment	2016-06-27	47	14	14F1	expt sheep	F1	Front left	front foot	left	foot	0	0	0	0	4.92605	0	0	0	0	0	0	0	2	1	0	no disease		1	0				0		0	0	0	0	20632	0	0	0	0	0.772765	0.215377	scald
1	15-25-F2	15	pre-treatment	2016-03-14	15	25	25F2	expt sheep	F2	Front right	front foot	right	foot	0	0	0	0	15.7813	0	0	0	0	0	1	1	4	0	0	no disease		0		0			0		0	0	0	0	20527	0	0	0	0	1.22483	0.721022	no disease
1	19-1-F4	19	pre-treatment	2016-03-28	19	1	1F4	expt sheep	F4	Back right	back foot	right	foot	0	0	0	0	0	0	0	0	0	0	0	0	3	0	0	no disease		0			0		0		0	0	0	0	20541	0	0	0	0	0		no disease
1	41-24-F1	41	pre-treatment	2016-06-06	41	24	24F1	expt sheep	F1	Front left	front foot	left	foot	37.1374	0	0	0	0	1	0	0	0	0	0	0	3	0	0	no disease		0	0				0		0	0	0	0	20611	1.58135	0	0	0	0		no disease
1	7-8-F3	7	pre-treatment	2016-02-15	7	8	8F3	expt sheep	F3	Back left	back foot	left	foot	0	0	0	0	73.9276	1	0	0	0	0	1	1	4	0	0	no disease		0					0		0	0	0	0	20499	0	0	0	0	1.87464	1.39169	codd
1	38-10-F4	38	pre-treatment	2016-05-31	38	10	10F4	expt sheep	F4	Back right	back foot	right	foot	11063.5	425.752	172647	44.2916	34486.7	1	1	1	1	1	1	1	2	3	footrot	FR		1			0		0		0	1	0	0	20605	4.04393	2.63018	5.23716	1.65602	4.53766	4.83922	codd
1	51-24-F4	51	post-treatment	2016-07-11	51	24	24F4	expt sheep	F4	Back right	back foot	right	foot	0	0	0	0	0	0	0	0	0	0	0	0	3	0	0	no disease		0			0		0		0	0	0	0	20646	0	0	0	0	0		no disease
0	13-9-F2	13	pre-treatment	2016-03-07	13	9	9F2	expt sheep	F2	Front right	front foot	right	foot	17.4177	0	0	0	0	0	0	0	0	0	0	0	3	0	0	no disease		1		0			0		0	0	0	0	20520	1.26524	0	0	0	0		codd
1	9-29-F1	9	pre-treatment	2016-02-22	9	29	29F1	expt sheep	F1	Front left	front foot	left	foot	0	0	0	0	0	0	0	0	0	0	0	0	4	0	0	no disease		1	0				0		0	0	0	0	20506	0	0	0	0	0		footrot
1	13-7-F2	13	pre-treatment	2016-03-07	13	7	7F2	expt sheep	F2	Front right	front foot	right	foot	0	0	0	0	0	0	0	0	0	0	0	0	3	0	0	no disease		1		0			0		0	0	0	0	20520	0	0	0	0	0		codd
1	31-8-F2	31	pre-treatment	2016-05-09	31	8	8F2	expt sheep	F2	Front right	front foot	right	foot	0	0	0	0	0	0	0	0	0	0	0	0	2	3	0	no disease		0		0			0		0	0	0	0	20583	0	0	0	0	0		no disease
1	13-23-F1	13	pre-treatment	2016-03-07	13	23	23F1	expt sheep	F1	Front left	front foot	left	foot	14.0976	0	0	0	0	0	0	0	0	0	0	0	3	0	0	no disease		1	0				0		0	0	0	0	20520	1.17891	0	0	0	0		no disease
1	27-26-F3	27	pre-treatment	2016-04-25	27	26	26F3	expt sheep	F3	Back left	back foot	left	foot	0	0	0	0	0	0	0	0	0	0	0	0	3	0	0	no disease		0				0	0		0	0	0	0	20569	0	0	0	0	0		no disease
1	23-28-F1	23	pre-treatment	2016-04-11	23	28	28F1	expt sheep	F1	Front left	front foot	left	foot	0	0	0	0	5.7224	0	0	0	0	0	0	0	3	0	0	no disease		0	0				0		0	0	0	0	20555	0	0	0	0	0.827524	0.280457	no disease
1	29-16-F1	29	pre-treatment	2016-05-03	29	16	16F1	expt sheep	F1	Front left	front foot	left	foot	0	0	0	0	0	0	0	0	0	0	0	0	3	0	0	no disease		1	0				0		0	0	0	0	20577	0	0	0	0	0		no disease
1	31-29-F2	31	pre-treatment	2016-05-09	31	29	29F2	expt sheep	F2	Front right	front foot	right	foot	0	0	0	0	0	0	0	0	0	0	0	0	3	0	0	no disease		0		0			0		0	0	0	0	20583	0	0	0	0	0		no disease
0	1-30-F1	1	pre-treatment	2016-01-26	1	30	30F1	expt sheep	F1	Front left	front foot	left	foot	0	0	0	0	0	0	0	0	0	0	0	0	2	0	0	no disease		1	0				0		0	0	0	0	20479	0	0	0	0	0		footrot
1	29-9-F2	29	pre-treatment	2016-05-03	29	9	9F2	expt sheep	F2	Front right	front foot	right	foot	17607.7	32639.6	212366	27865.8	8996.27	1	1	1	1	1	1	1	2	2	footrot	FR		1		0			0		0	1	0	0	20577	4.24573	4.51376	5.32709	4.44509	3.95411	4.91948	codd
0	1-20-F2	1	pre-treatment	2016-01-26	1	20	20F2	expt sheep	F2	Front right	front foot	right	foot	0	0	0	0	0	0	0	0	0	0	0	0	2	0	0	no disease		1		0			0		0	0	0	0	20479	0	0	0	0	0		no disease
1	5-20-F3	5	pre-treatment	2016-02-08	5	20	20F3	expt sheep	F3	Back left	back foot	left	foot	0	0	0	0	0	0	0	0	0	0	0	0	3	0	0	no disease		1				0	0		0	0	0	0	20492	0	0	0	0	0		no disease
1	11-24-F3	11	pre-treatment	2016-02-29	11	24	24F3	expt sheep	F3	Back left	back foot	left	foot	0	0	0	0	0	0	0	0	0	0	0	0	4	0	0	no disease		0				0	0		0	0	0	0	20513	0	0	0	0	0		no disease
1	11-5-F2	11	pre-treatment	2016-02-29	11	5	5F2	expt sheep	F2	Front right	front foot	right	foot	0	0	0	0	0	0	0	0	0	0	0	0	3	0	0	no disease		0		0			0		0	0	0	0	20513	0	0	0	0	0		codd
1	30-42-F1	30	pre-treatment	2016-05-04	30	42	42F1	source sheep	F1	Front left	front foot	left	foot	8809.12	774.63	263128	1996.84	32537.4	1	1	1	1	1	1	1	2	3	CODD	CODD	CODD only	1	1				1	codd1-4	0	0	1	0	20578	3.94498	2.88965	5.42017	3.30056	4.5124	4.9966
1	33-7-F3	33	pre-treatment	2016-05-16	33	7	7F3	expt sheep	F3	Back left	back foot	left	foot	0	0	0	0	0	0	0	0	0	0	0	0	3	3	0	no disease		1				0	0		0	0	0	0	20590	0	0	0	0	0		scald
1	9-2-F1	9	pre-treatment	2016-02-22	9	2	2F1	expt sheep	F1	Front left	front foot	left	foot	9.17819	0	0	0	0	0	0	0	0	0	0	0	4	0	0	no disease		1	0				0		0	0	0	0	20506	1.00767	0	0	0	0		footrot
1	15-26-F1	15	pre-treatment	2016-03-14	15	26	26F1	expt sheep	F1	Front left	front foot	left	foot	0	0	0	0	37.8906	1	0	0	0	0	1	1	3	0	0	no disease		0	0				0		0	0	0	0	20527	0	0	0	0	1.58984	1.10141	codd
1	33-19-F1	33	pre-treatment	2016-05-16	33	19	19F1	expt sheep	F1	Front left	front foot	left	foot	0	0	0	0	0	0	0	0	0	0	0	0	2	0	0	no disease		1	0				0		0	0	0	0	20590	0	0	0	0	0		no disease
1	29-20-F2	29	pre-treatment	2016-05-03	29	20	20F2	expt sheep	F2	Front right	front foot	right	foot	0	0	0	0	0	0	0	0	0	0	0	0	2	0	0	no disease		1		0			0		0	0	0	0	20577	0	0	0	0	0		no disease
1	25-6-F3	25	pre-treatment	2016-04-18	25	6	6F3	expt sheep	F3	Back left	back foot	left	foot	0	0	27.1148	0	15.2349	1	0	0	0	0	1	1	3	0	0	no disease		1				0	0		0	0	0	0	20562	0	0	1.44893	0	1.21045	1.14973	no disease
1	47-10-F3	47	post-treatment	2016-06-27	47	10	10F3	expt sheep	F3	Back left	back foot	left	foot	0	0	0	0	0	0	0	0	0	0	0	0	3	0	0	no disease		1				0	0		0	0	0	0	20632	0	0	0	0	0		no disease
1	15-9-F3	15	pre-treatment	2016-03-14	15	9	9F3	expt sheep	F3	Back left	back foot	left	foot	0	0	0	0	0	0	0	0	0	0	0	0	3	0	0	no disease		0				0	0		0	0	0	0	20527	0	0	0	0	0		no disease
1	19-15-F1	19	pre-treatment	2016-03-28	19	15	15F1	expt sheep	F1	Front left	front foot	left	foot	4954.24	211988	0	3.35177	1925.93	1	1	1	0	0	1	1	3	3	fr&scald	FR		0	0				0		0	1	0	0	20541	3.69506	5.32631	0	0.638666	3.28487	2.80827	codd
1	11-4-F4	11	pre-treatment	2016-02-29	11	4	4F4	expt sheep	F4	Back right	back foot	right	foot	199.186	0	0	1.46304	26.6185	1	1	0	0	0	1	1	4	0	0	no disease		0			0		0		0	0	0	0	20513	2.30143	0	0	0.391472	1.4412	0.9713	no disease
1	27-6-F1	27	pre-treatment	2016-04-25	27	6	6F1	expt sheep	F1	Front left	front foot	left	foot	0	0	0	0	13.1358	0	0	0	0	0	1	1	3	0	0	no disease		0	0				0		0	0	0	0	20569	0	0	0	0	1.15032	0.641335	codd
1	19-10-F4	19	pre-treatment	2016-03-28	19	10	10F4	expt sheep	F4	Back right	back foot	right	foot	0	0	0	0	13.9161	0	0	0	0	0	1	1	3	0	0	no disease		0			0		0		0	0	0	0	20541	0	0	0	0	1.17366	0.666396	codd
1	43-18-F2	43	post-treatment	2016-06-13	43	18	18F2	expt sheep	F2	Front right	front foot	right	foot	26.9783	0	0	0	0	1	0	0	0	0	0	0	3	0	0	no disease		1		0			0		0	0	0	0	20618	1.44682	0	0	0	0		no disease
1	21-28-F3	21	pre-treatment	2016-04-04	21	28	28F3	expt sheep	F3	Back left	back foot	left	foot	0	0	0	0	10.8951	0	0	0	0	0	1	1	4	0	overgrown	other		1				0	0		0	0	0	1	20548	0	0	0	0	1.07537	0.560109	no disease
1	33-44-F1	33	pre-treatment	2016-05-16	33	44	44F1	source sheep	F1	Front left	front foot	left	foot	0	0	31.0408	5.86727	0	1	0	0	0	0	0	0	2	3	0	no disease		1	0				0		0	0	0	0	20590	0	0	1.5057	0.836784	0	1.09
1	11-20-F3	11	pre-treatment	2016-02-29	11	20	20F3	expt sheep	F3	Back left	back foot	left	foot	19.9818	0	0	0	9.83127	0	0	0	0	0	0	0	3	0	0	no disease		0				0	0		0	0	0	0	20513	1.32184	0	0	0	1.03468	0.515488	no disease
1	17-1-F4	17	pre-treatment	2016-03-21		1	1F4	expt sheep	F4	Back right	back foot	right	foot	0	0	0	0	7.59136	0	0	0	0	0	0	0			0	no disease					0		0		0	0	0	0		0	0	0	0	0.934062	0.403199	no disease
1	21-19-F4	21	pre-treatment	2016-04-04	21	19	19F4	expt sheep	F4	Back right	back foot	right	foot	0	809.999	0	0	0	1	0	1	0	0	0	0	2	0	0	no disease		1			0		0		0	0	0	0	20548	0	2.90902	0	0	0		no disease
1	23-1-F1	23	pre-treatment	2016-04-11	23	1	1F1	expt sheep	F1	Front left	front foot	left	foot	0	0	0	0	0	0	0	0	0	0	0	0	3	0	0	no disease		0	0				0		0	0	0	0	20555	0	0	0	0	0		no disease
1	15-28-F2	15	pre-treatment	2016-03-14	15	28	28F2	expt sheep	F2	Front right	front foot	right	foot	0	0	0	0	34.2165	1	0	0	0	0	1	1	3	0	0	no disease		0		0			0		0	0	0	0	20527	0	0	0	0	1.54675	1.05711	footrot
1	38-5-F3	38	pre-treatment	2016-05-31	38	5	5F3	expt sheep	F3	Back left	back foot	left	foot	95.431	0	436.269	23.7182	68.5376	1	1	0	1	0	1	1	2	3	0	no disease		1				0	0		0	0	0	0	20605	1.98422	0	2.64075	1.39302	1.84222	2.24594	codd
1	19-5-F1	19	pre-treatment	2016-03-28	19	5	5F1	expt sheep	F1	Front left	front foot	left	foot	22.7463	0	0	0	5.33798	1	0	0	0	0	0	0	3	0	scald	ID		0	0				0		1	0	0	0	20541	1.3756	0	0	0	0.801951	0.250256	codd
1	43-30-F1	43	post-treatment	2016-06-13	43	30	30F1	expt sheep	F1	Front left	front foot	left	foot	131510	0	62302.6	116507	7210.27	1	1	0	1	1	1	1	2	1	footrot	FR		1	0				0		0	1	0	0	20618	5.11896	0	4.79451	5.06636	3.85801	4.79244	footrot
1	38-14-F3	38	pre-treatment	2016-05-31	38	14	14F3	expt sheep	F3	Back left	back foot	left	foot	20207.4	226.131	463387	42130.4	38154.1	1	1	1	1	1	1	1	2	3	CODD	CODD	CODD only	1				3	3	codd1-4	0	0	1	0	20605	4.30553	2.35628	5.66595	4.62461	4.58155	5.25822	codd
1	31-12-F1	31	pre-treatment	2016-05-09	31	12	12F1	expt sheep	F1	Front left	front foot	left	foot	0	0	0	0	0	0	0	0	0	0	0	0	3	3	0	no disease		0	0				0		0	0	0	0	20583	0	0	0	0	0		no disease
1	41-30-F1	41	pre-treatment	2016-06-06	41	30	30F1	expt sheep	F1	Front left	front foot	left	foot	13290.1	0	0	13072.1	436.417	1	1	0	0	1	1	1	3	0	scald	ID		0	0				0		1	0	0	0	20611	4.12356	0	0	4.11638	2.6409	3.65349	footrot
0	1-20-F4	1	pre-treatment	2016-01-26	1	20	20F4	expt sheep	F4	Back right	back foot	right	foot	0	0	0	0	0	0	0	0	0	0	0	0	2	0	0	no disease		1			0		0		0	0	0	0	20479	0	0	0	0	0		no disease
1	27-1-F4	27	pre-treatment	2016-04-25	27	1	1F4	expt sheep	F4	Back right	back foot	right	foot	0	0	0	8.65371	13.5629	0	0	0	0	0	1	1	3	0	0	no disease		0			0		0		0	0	0	0	20569	0	0	0	0.984694	1.16325	0.869556	no disease
1	21-24-F3	21	pre-treatment	2016-04-04	21	24	24F3	expt sheep	F3	Back left	back foot	left	foot	26.6603	0	0	0	16.5493	1	0	0	0	0	1	1	4	0	0	no disease		1				0	0		0	0	0	0	20548	1.44186	0	0	0	1.24426	0.741659	no disease
1	38-30-F1	38	pre-treatment	2016-05-31	38	30	30F1	expt sheep	F1	Front left	front foot	left	foot	313.057	0	0	12.6081	7.19456	1	1	0	0	0	0	0	3	0	0	no disease		1	0				0		0	0	0	0	20605	2.49701	0	0	1.1338	0.913525	0.819603	footrot
1	15-17-F2	15	pre-treatment	2016-03-14	15	17	17F2	expt sheep	F2	Front right	front foot	right	foot	0	0	0	0	0	0	0	0	0	0	0	0	3	0	0	no disease		0		0			0		0	0	0	0	20527	0	0	0	0	0		codd
1	11-22-F4	11	pre-treatment	2016-02-29	11	22	22F4	expt sheep	F4	Back right	back foot	right	foot	12.6537	0	0	9.04377	0	0	0	0	0	0	0	0	4	0	0	no disease		0			0		0		0	0	0	0	20513	1.13525	0	0	1.0019	0	0.479228	no disease
1	17-23-F1	17	pre-treatment	2016-03-21	17	23	23F1	expt sheep	F1	Front left	front foot	left	foot	0	0	0	0	0	0	0	0	0	0	0	0	3	0	0	no disease		1	0				0		0	0	0	0	20534	0	0	0	0	0		no disease
1	17-29-F1	17	pre-treatment	2016-03-21	17	29	29F1	expt sheep	F1	Front left	front foot	left	foot	37.2049	0	28.3433	3.3325	7.17481	1	0	0	0	0	0	0	4	0	0	no disease		1	0				0		0	0	0	0	20534	1.58212	0	1.46751	0.636738	0.912477	1.11228	footrot
1	27-3-F3	27	pre-treatment	2016-04-25	27	3	3F3	expt sheep	F3	Back left	back foot	left	foot	0	811.393	0	0	0	1	0	1	0	0	0	0	4	2	0	no disease		0				0	0		0	0	0	0	20569	0	2.90977	0	0	0		no disease
1	17-3-F3	17	pre-treatment	2016-03-21	17	3	3F3	expt sheep	F3	Back left	back foot	left	foot	20.2901	0	0	0	0	1	0	0	0	0	0	0	4	0	0	no disease		1					0		0	0	0	0	20534	1.32818	0	0	0	0		no disease
1	5-19-F4	5	pre-treatment	2016-02-08	5	19	19F4	expt sheep	F4	Back right	back foot	right	foot	0	0	0	0	0	0	0	0	0	0	0	0	2	0	0	no disease		1			0		0		0	0	0	0	20492	0	0	0	0	0		no disease
1	5-28-F4	5	pre-treatment	2016-02-08	5	28	28F4	expt sheep	F4	Back right	back foot	right	foot	38.1361	0	27.7097	0	12.2681	1	0	0	0	0	1	1	3	0	scald	ID		1			0		0		1	0	0	0	20492	1.59258	0	1.45803	0	1.12281	1.1247	scald
1	43-17-F1	43	post-treatment	2016-06-13	43	17	17F1	expt sheep	F1	Front left	front foot	left	foot	0	0	0	26.6597	8.36361	1	0	0	0	1	0	1	3	3	0	no disease		1	0				0		0	0	0	0	20618	0	0	0	1.44185	0.971443	1.06724	no disease
1	43-20-F1	43	post-treatment	2016-06-13	43	20	20F1	expt sheep	F1	Front left	front foot	left	foot	46.1594	0	108.404	0	11.2891	1	1	0	1	0	1	1	3	0	0	no disease		1	0				0		0	0	0	0	20618	1.67357	0	2.03903	0	1.08952	1.60095	no disease
1	35-6-F2	35	pre-treatment	2016-05-23	35	6	6F2	expt sheep	F2	Front right	front foot	right	foot	0	0	0	6.70245	4.92942	0	0	0	0	0	0	0	2	3	0	no disease		0		0			0		0	0	0	0	20597	0	0	0	0.886629	0.773012	0.588528	footrot
1	13-2-F3	13	pre-treatment	2016-03-07	13	2	2F3	expt sheep	F3	Back left	back foot	left	foot	33.3897	0	0	0	6.2524	1	0	0	0	0	0	0	3	0	0	no disease		1				0	0		0	0	0	0	20520	1.53643	0	0	0	0.860482	0.318926	footrot
1	5-20-F2	5	pre-treatment	2016-02-08	5	20	20F2	expt sheep	F2	Front right	front foot	right	foot	0	0	0	0	0	0	0	0	0	0	0	0	3	0	0	no disease		1		0			0		0	0	0	0	20492	0	0	0	0	0		no disease
1	25-7-F3	25	pre-treatment	2016-04-18	25	7	7F3	expt sheep	F3	Back left	back foot	left	foot	0	120.669	0	0	0	1	0	1	0	0	0	0	3	3	0	no disease		1				0	0		0	0	0	0	20562	0	2.08518	0	0	0		scald
1	15-3-F1	15	pre-treatment	2016-03-14	15	3	3F1	expt sheep	F1	Front left	front foot	left	foot	0	0	0	0	2.8428	0	0	0	0	0	0	0	4	0	0	no disease		0	0				0		0	0	0	0	20527	0	0	0	0	0.584648	-0.0233746	codd
1	35-13-F4	35	pre-treatment	2016-05-23	35	13	13F4	expt sheep	F4	Back right	back foot	right	foot	0	0	0	0	0	0	0	0	0	0	0	0	3	0	0	no disease		0			0		0		0	0	0	0	20597	0	0	0	0	0		no disease
1	23-13-F2	23	pre-treatment	2016-04-11	23	13	13F2	expt sheep	F2	Front right	front foot	right	foot	22.6366	81.2654	0	0	0	1	0	1	0	0	0	0	3	0	0	no disease		0		0			0		0	0	0	0	20555	1.37359	1.91522	0	0	0		no disease
1	13-25-F1	13	pre-treatment	2016-03-07	13	25	25F1	expt sheep	F1	Front left	front foot	left	foot	47.6369	0	0	2.99916	10.7264	1	1	0	0	0	1	1	4	0	0	no disease		1	0				0		0	0	0	0	20520	1.68697	0	0	0.601969	1.06916	0.660407	no disease
1	11-4-F2	11	pre-treatment	2016-02-29	11	4	4F2	expt sheep	F2	Front right	front foot	right	foot	0	0	57.3299	4.51237	23.2798	1	0	0	1	0	1	1	4	0	0	no disease		0		0			0		0	0	0	0	20513	0	0	1.76589	0.741338	1.38524	1.45292	scald
1	13-11-F4	13	pre-treatment	2016-03-07	13	11	11F4	expt sheep	F4	Back right	back foot	right	foot	25.9465	0	0	0	2.68075	1	0	0	0	0	0	0	3	0	0	no disease		1			0		0		0	0	0	0	20520	1.4305	0	0	0	0.565936	-0.0488651	no disease
1	7-14-F3	7	pre-treatment	2016-02-15	7	14	14F3	expt sheep	F3	Back left	back foot	left	foot	0	0	0	0	0	0	0	0	0	0	0	0	3	0	0	no disease		0				0	0		0	0	0	0	20499	0	0	0	0	0		codd
1	13-30-F2	13	pre-treatment	2016-03-07	13	30	30F2	expt sheep	F2	Front right	front foot	right	foot	12.6718	0	0	0	0	0	0	0	0	0	0	0	3	0	0	no disease		1		0			0		0	0	0	0	20520	1.13583	0	0	0	0		scald
1	23-10-F4	23	pre-treatment	2016-04-11	23	10	10F4	expt sheep	F4	Back right	back foot	right	foot	0	0	0	0	0	0	0	0	0	0	0	0	3	0	0	no disease		0			0		0		0	0	0	0	20555	0	0	0	0	0		codd
1	41-8-F1	41	pre-treatment	2016-06-06	41	8	8F1	expt sheep	F1	Front left	front foot	left	foot	0	0	0	0	0	0	0	0	0	0	0	0	2	3	0	no disease		0	0				0		0	0	0	0	20611	0	0	0	0	0		no disease
1	19-6-F4	19	pre-treatment	2016-03-28	19	6	6F4	expt sheep	F4	Back right	back foot	right	foot	0	0	0	0	0	0	0	0	0	0	0	0	3	0	overgrown	other		0			0		0		0	0	0	1	20541	0	0	0	0	0		no disease
1	41-5-F2	41	pre-treatment	2016-06-06	41	5	5F2	expt sheep	F2	Front right	front foot	right	foot	3234.42	351.085	433504	25137.3	17132.7	1	1	1	1	1	1	1	2	3	CODD	CODD	CODD only	0		4			4	codd1-4	0	0	1	0	20611	3.50993	2.54665	5.63699	4.40034	4.23385	5.20028	codd
1	5-24-F3	5	pre-treatment	2016-02-08	5	24	24F3	expt sheep	F3	Back left	back foot	left	foot	0	0	0	0	0	0	0	0	0	0	0	0	3	0	0	no disease		1				0	0		0	0	0	0	20492	0	0	0	0	0		no disease
1	38-13-F2	38	pre-treatment	2016-05-31	38	13	13F2	expt sheep	F2	Front right	front foot	right	foot	0	71.5472	0	50.5175	11.5805	1	0	1	0	1	1	1	3	0	0	no disease		1		0			0		0	0	0	0	20605	0	1.86062	0	1.71195	1.0997	1.31596	no disease
1	23-5-F2	23	pre-treatment	2016-04-11	23	5	5F2	expt sheep	F2	Front right	front foot	right	foot	0	125.803	0	0	0	1	0	1	0	0	0	0	3	0	0	no disease		0		0			0		0	0	0	0	20555	0	2.10313	0	0	0		codd
1	13-17-F1	13	pre-treatment	2016-03-07	13	17	17F1	expt sheep	F1	Front left	front foot	left	foot	21.2123	0	0	3.45668	14.7273	1	0	0	0	0	1	1	3	0	0	no disease		1	0				0		0	0	0	0	20520	1.34659	0	0	0.649011	1.19665	0.782567	no disease
1	31-13-F3	31	pre-treatment	2016-05-09	31	13	13F3	expt sheep	F3	Back left	back foot	left	foot	22.5823	0	0	0	0	1	0	0	0	0	0	0	3	0	0	no disease		0				0	0		0	0	0	0	20583	1.37259	0	0	0	0		no disease
0	1-20-F3	1	pre-treatment	2016-01-26	1	20	20F3	expt sheep	F3	Back left	back foot	left	foot	0	0	0	0	0	0	0	0	0	0	0	0	2	0	0	no disease		1				0	0		0	0	0	0	20479	0	0	0	0	0		no disease
1	11-12-F3	11	pre-treatment	2016-02-29	11	12	12F3	expt sheep	F3	Back left	back foot	left	foot	15.4351	0	7.09413	0	0	0	0	0	0	0	0	0	3	0	0	no disease		0				0	0		0	0	0	0	20513	1.21577	0	0.90817	0	0	0.373778	codd
1	43-7-F2	43	post-treatment	2016-06-13	43	7	7F2	expt sheep	F2	Front right	front foot	right	foot	4825.98	28378.6	31801.8	8796.29	1693.71	1	1	1	1	1	1	1	3	3	fr&CODD	CODD	CODD & footrot	1		0			0	codd1-4	0	0	1	0	20618	3.68368	4.45301	4.50247	3.94435	3.2291	4.14913	codd
1	13-4-F3	13	pre-treatment	2016-03-07	13	4	4F3	expt sheep	F3	Back left	back foot	left	foot	27.2935	1567.27	0	0	0	1	0	1	0	0	0	0	3	0	0	no disease		1				0	0		0	0	0	0	20520	1.45169	3.19542	0	0	0		no disease
1	7-10-F3	7	pre-treatment	2016-02-15	7	10	10F3	expt sheep	F3	Back left	back foot	left	foot	0	0	0	0	0	0	0	0	0	0	0	0	3	1	0	no disease		0				0	0		0	0	0	0	20499	0	0	0	0	0		no disease
0	13-23-F2	13	pre-treatment	2016-03-07	13	23	23F2	expt sheep	F2	Front right	front foot	right	foot	0	0	0	0	0	0	0	0	0	0	0	0	3	0	0	no disease		1		0			0		0	0	0	0	20520	0	0	0	0	0		no disease
1	25-11-F1	25	pre-treatment	2016-04-18	25	11	11F1	expt sheep	F1	Front left	front foot	left	foot	9.79378	0	0	0	0	0	0	0	0	0	0	0	3	0	0	no disease		1	0				0		0	0	0	0	20562	1.03317	0	0	0	0		scald
1	33-23-F1	33	pre-treatment	2016-05-16	33	23	23F1	expt sheep	F1	Front left	front foot	left	foot	0	0	0	0	3.16003	0	0	0	0	0	0	0	2	3	0	no disease		1	0				0		0	0	0	0	20590	0	0	0	0	0.619097	0.0225703	no disease
1	9-10-F1	9	pre-treatment	2016-02-22	9	10	10F1	expt sheep	F1	Front left	front foot	left	foot	14.8483	0	0	0	0	0	0	0	0	0	0	0	3	0	0	no disease		1	0				0		0	0	0	0	20506	1.19998	0	0	0	0		no disease
1	13-12-F1	13	pre-treatment	2016-03-07	13	12	12F1	expt sheep	F1	Front left	front foot	left	foot	0	0	0	0	5.84754	0	0	0	0	0	0	0	3	0	0	no disease		1	0				0		0	0	0	0	20520	0	0	0	0	0.835535	0.289852	no disease
1	31-27-F3	31	pre-treatment	2016-05-09	31	27	27F3	expt sheep	F3	Back left	back foot	left	foot	16.4274	0	0	2.5512	11.26	0	0	0	0	0	1	1	3	0	0	no disease		0				0	0		0	0	0	0	20583	1.24123	0	0	0.550375	1.08849	0.663111	no disease
1	1-17-F2	1	pre-treatment	2016-01-26	1	17	17F2	expt sheep	F2	Front right	front foot	right	foot	0	0	0	0	0	0	0	0	0	0	0	0	3	0	0	no disease		1		0			0		0	0	0	0	20479	0	0	0	0	0		codd
0	17-11-F2	17	pre-treatment	2016-03-21	17	11	11F2	expt sheep	F2	Front right	front foot	right	foot	22.3008	0	0	0	5.0369	1	0	0	0	0	0	0	3	0	0	no disease		1		0			0		0	0	0	0	20534	1.36737	0	0	0	0.780814	0.225042	scald
1	11-8-F4	11	pre-treatment	2016-02-29	11	8	8F4	expt sheep	F4	Back right	back foot	right	foot	0	0	0	0	0	0	0	0	0	0	0	0	3	0	0	no disease		0			0		0		0	0	0	0	20513	0	0	0	0	0		scald
1	27-2-F1	27	pre-treatment	2016-04-25	27	2	2F1	expt sheep	F1	Front left	front foot	left	foot	0	7298.46	10.2754	5.57321	0	1	0	1	0	0	0	0	3	3	0	no disease		0	0				0		0	0	0	0	20569	0	3.86329	1.05213	0.817778	0	0.722871	footrot
1	47-8-F4	47	post-treatment	2016-06-27	47	8	8F4	expt sheep	F4	Back right	back foot	right	foot	0	0	0	0	0	0	0	0	0	0	0	0	3	0	0	no disease		1			0		0		0	0	0	0	20632	0	0	0	0	0		scald
1	19-23-F2	19	pre-treatment	2016-03-28	19	23	23F2	expt sheep	F2	Front right	front foot	right	foot	0	0	0	0	0	0	0	0	0	0	0	0	4	0	0	no disease		0		0			0		0	0	0	0	20541	0	0	0	0	0		no disease
1	33-25-F2	33	pre-treatment	2016-05-16	33	25	25F2	expt sheep	F2	Front right	front foot	right	foot	0	0	0	0	0	0	0	0	0	0	0	0	3	0	0	no disease		1		0			0		0	0	0	0	20590	0	0	0	0	0		no disease
1	31-17-F2	31	pre-treatment	2016-05-09	31	17	17F2	expt sheep	F2	Front right	front foot	right	foot	14.229	0	0	0	0	0	0	0	0	0	0	0	3	0	0	no disease		0		0			0		0	0	0	0	20583	1.18267	0	0	0	0		codd
1	47-25-F2	47	post-treatment	2016-06-27	47	25	25F2	expt sheep	F2	Front right	front foot	right	foot	0	0	0	0	0	0	0	0	0	0	0	0	3	0	0	no disease		1		0			0		0	0	0	0	20632	0	0	0	0	0		no disease
1	5-9-F4	5	pre-treatment	2016-02-08	5	9	9F4	expt sheep	F4	Back right	back foot	right	foot	3.80382	0	0	0	0	0	0	0	0	0	0	0	3	0	0	no disease		1			0		0		0	0	0	0	20492	0.681587	0	0	0	0		no disease
1	51-21-F1	51	post-treatment	2016-07-11	51	21	21F1	expt sheep	F1	Front left	front foot	left	foot	0	0	0	0	0	0	0	0	0	0	0	0	3	0	0	no disease		0	0				0		0	0	0	0	20646	0	0	0	0	0		no disease
1	29-13-F4	29	pre-treatment	2016-05-03	29	13	13F4	expt sheep	F4	Back right	back foot	right	foot	0	0	0	0	3.10248	0	0	0	0	0	0	0	3	0	0	no disease		1			0		0		0	0	0	0	20577	0	0	0	0	0.613047	0.0145883	no disease
1	23-2-F4	23	pre-treatment	2016-04-11	23	2	2F4	expt sheep	F4	Back right	back foot	right	foot	0	0	0	0	0	0	0	0	0	0	0	0	3	0	0	no disease		0			0		0		0	0	0	0	20555	0	0	0	0	0		footrot
1	23-6-F2	23	pre-treatment	2016-04-11	23	6	6F2	expt sheep	F2	Front right	front foot	right	foot	0	0	0	0	0	0	0	0	0	0	0	0	3	0	0	no disease		0		0			0		0	0	0	0	20555	0	0	0	0	0		footrot
1	13-14-F3	13	pre-treatment	2016-03-07	13	14	14F3	expt sheep	F3	Back left	back foot	left	foot	0	0	0	0	0	0	0	0	0	0	0	0	3	0	0	no disease		1				0	0		0	0	0	0	20520	0	0	0	0	0		codd
1	33-43-F3	33	pre-treatment	2016-05-16	33	43	43F3	source sheep	F3	Back left	back foot	left	foot	61.7463	0	0	0	0	1	1	0	0	0	0	0	3	3	0	no disease		1				0	0		0	0	0	0	20590	1.79759	0	0	0	0
1	38-25-F1	38	pre-treatment	2016-05-31	38	25	25F1	expt sheep	F1	Front left	front foot	left	foot	0	0	31.2965	0	0	1	0	0	0	0	0	0	3	0	0	no disease		1	0				0		0	0	0	0	20605	0	0	1.50916	0	0	1.01838	no disease
1	19-6-F1	19	pre-treatment	2016-03-28	19	6	6F1	expt sheep	F1	Front left	front foot	left	foot	0	280.358	0	0	0	1	0	1	0	0	0	0	3	0	overgrown	other		0	0				0		0	0	0	1	20541	0	2.44926	0	0	0		codd
1	21-30-F3	21	pre-treatment	2016-04-04	21	30	30F3	expt sheep	F3	Back left	back foot	left	foot	0	0	0	0	0	0	0	0	0	0	0	0	3	0	0	no disease		1				0	0		0	0	0	0	20548	0	0	0	0	0		scald
1	17-14-F4	17	pre-treatment	2016-03-21		14	14F4	expt sheep	F4	Back right	back foot	right	foot	0	0	0	0	0	0	0	0	0	0	0	0			0	no disease					0		0		0	0	0	0		0	0	0	0	0		codd
1	33-10-F2	33	pre-treatment	2016-05-16	33	10	10F2	expt sheep	F2	Front right	front foot	right	foot	0	0	0	0.420462	0	0	0	0	0	0	0	0	3	0	0	no disease		1		0			0		0	0	0	0	20590	0	0	0	0.152429	0	-0.853395	footrot
1	23-12-F1	23	pre-treatment	2016-04-11	23	12	12F1	expt sheep	F1	Front left	front foot	left	foot	0	0	0	0	11.3803	0	0	0	0	0	1	1	4	0	0	no disease		0	0				0		0	0	0	0	20555	0	0	0	0	1.09273	0.579032	no disease
1	43-5-F3	43	post-treatment	2016-06-13	43	5	5F3	expt sheep	F3	Back left	back foot	left	foot	60.3241	0	236.006	21.1294	7.53998	1	1	0	1	0	0	1	1	3	0	no disease		1				0	0		0	0	0	0	20618	1.78763	0	2.37476	1.34497	0.931457	1.94559	codd
1	33-25-F3	33	pre-treatment	2016-05-16	33	25	25F3	expt sheep	F3	Back left	back foot	left	foot	0	0	0	0	0	0	0	0	0	0	0	0	3	0	0	no disease		1				0	0		0	0	0	0	20590	0	0	0	0	0		no disease
1	31-7-F4	31	pre-treatment	2016-05-09	31	7	7F4	expt sheep	F4	Back right	back foot	right	foot	0	0	0	3.92276	0	0	0	0	0	0	0	0	3	0	0	no disease		0			0		0		0	0	0	0	20583	0	0	0	0.692209	0	0.11647	scald
1	19-8-F1	19	pre-treatment	2016-03-28	19	8	8F1	expt sheep	F1	Front left	front foot	left	foot	25.886	0	0	4.20933	0	1	0	0	0	0	0	0	3	0	overgrown	other		0	0				0		0	0	0	1	20541	1.42953	0	0	0.716782	0	0.147092	no disease
1	41-6-F3	41	pre-treatment	2016-06-06	41	6	6F3	expt sheep	F3	Back left	back foot	left	foot	21.1744	0	0	0	10.4375	1	0	0	0	0	1	1	2	3	0	no disease		0				0	0		0	0	0	0	20611	1.34585	0	0	0	1.05833	0.541474	no disease
1	47-17-F2	47	post-treatment	2016-06-27	47	17	17F2	expt sheep	F2	Front right	front foot	right	foot	0	9186.99	0	0	7317.12	1	0	1	0	0	1	1	2	2	footrot	FR		1		0			0		0	1	0	0	20632	0	3.96322	0	0	3.8644	3.38722	codd
1	29-8-F1	29	pre-treatment	2016-05-03	29	8	8F1	expt sheep	F1	Front left	front foot	left	foot	0	93.6893	21.0676	0	0	1	0	1	0	0	0	0	3	3	0	no disease		1	0				0		0	0	0	0	20577	0	1.9763	1.34375	0	0	0.846493	no disease
1	17-22-F3	17	pre-treatment	2016-03-21	17	22	22F3	expt sheep	F3	Back left	back foot	left	foot	0	0	0	7.11152	0	0	0	0	0	0	0	0	3	0	0	no disease		1				0	0		0	0	0	0	20534	0	0	0	0.909102	0	0.374841	scald
1	13-3-F4	13	pre-treatment	2016-03-07	13	3	3F4	expt sheep	F4	Back right	back foot	right	foot	22.5192	0	0	0	0	1	0	0	0	0	0	0	3	0	0	no disease		1			0		0		0	0	0	0	20520	1.37142	0	0	0	0		no disease
1	15-5-F2	15	pre-treatment	2016-03-14	15	5	5F2	expt sheep	F2	Front right	front foot	right	foot	9.14317	0	0	2.86026	0	0	0	0	0	0	0	0	4	0	0	no disease		0		0			0		0	0	0	0	20527	1.00617	0	0	0.586617	0	-0.0207156	codd
1	9-14-F1	9	pre-treatment	2016-02-22	9	14	14F1	expt sheep	F1	Front left	front foot	left	foot	0	0	0	0	5.61765	0	0	0	0	0	0	0	3	0	0	no disease		1	0				0		0	0	0	0	20506	0	0	0	0	0.820704	0.272433	scald
1	23-6-F1	23	pre-treatment	2016-04-11	23	6	6F1	expt sheep	F1	Front left	front foot	left	foot	0	153.481	34.1561	0	4.2168	1	0	1	1	0	0	1	3	0	0	no disease		0	0				0		0	0	0	0	20555	0	2.18887	1.546	0	0.717405	1.1069	codd
1	51-20-F1	51	post-treatment	2016-07-11	51	20	20F1	expt sheep	F1	Front left	front foot	left	foot	0	0	0	0	0	0	0	0	0	0	0	0	3	0	0	no disease		0	0				0		0	0	0	0	20646	0	0	0	0	0		no disease
1	23-20-F4	23	pre-treatment	2016-04-11	23	20	20F4	expt sheep	F4	Back right	back foot	right	foot	0	0	0	0	4.25043	0	0	0	0	0	0	0	3	0	0	no disease		0			0		0		0	0	0	0	20555	0	0	0	0	0.720194	0.151311	no disease
0	35-17-F3	35	pre-treatment	2016-05-23	35	17	17F3	expt sheep	F3	Back left	back foot	left	foot	0	0	0	0	0	0	0	0	0	0	0	0	3	0	0	no disease		0				0	0		0	0	0	0	20597	0	0	0	0	0		scald
1	51-11-F2	51	post-treatment	2016-07-11	51	11	11F2	expt sheep	F2	Front right	front foot	right	foot	0	0	0	0	8.4917	0	0	0	0	0	0	0	3	0	0	no disease		0		0			0		0	0	0	0	20646	0	0	0	0	0.977344	0.451873	scald
1	51-5-F4	51	post-treatment	2016-07-11	51	5	5F4	expt sheep	F4	Back right	back foot	right	foot	25.9818	0	0	0	0	1	0	0	0	0	0	0	3	0	CODD	CODD	CODD only	0			5		5	codd5	0	0	1	0	20646	1.43107	0	0	0	0		codd
1	31-14-F2	31	pre-treatment	2016-05-09	31	14	14F2	expt sheep	F2	Front right	front foot	right	foot	0	0	0	0	0	0	0	0	0	0	0	0	2	3	0	no disease		0		0			0		0	0	0	0	20583	0	0	0	0	0		scald
0	1-4-F3	1	pre-treatment	2016-01-26	1	4	4F3	expt sheep	F3	Back left	back foot	left	foot	3.64015	0	0	0	3.55754	0	0	0	0	0	0	0	3	1	0	no disease		1				0	0		0	0	0	0	20479	0.666532	0	0	0	0.658731	0.0740291	no disease
1	23-12-F2	23	pre-treatment	2016-04-11	23	12	12F2	expt sheep	F2	Front right	front foot	right	foot	109.701	278.516	0	0	5.34422	1	1	1	0	0	0	0	4	0	0	no disease		0		0			0		0	0	0	0	20555	2.04415	2.44641	0	0	0.802379	0.250763	codd
1	41-20-F1	41	pre-treatment	2016-06-06	41	20	20F1	expt sheep	F1	Front left	front foot	left	foot	0	0	0	0	0	0	0	0	0	0	0	0	3	0	0	no disease		0	0				0		0	0	0	0	20611	0	0	0	0	0		no disease
1	15-9-F2	15	pre-treatment	2016-03-14	15	9	9F2	expt sheep	F2	Front right	front foot	right	foot	0	0	0	0	0	0	0	0	0	0	0	0	3	0	0	no disease		0		0			0		0	0	0	0	20527	0	0	0	0	0		codd
1	29-19-F2	29	pre-treatment	2016-05-03	29	19	19F2	expt sheep	F2	Front right	front foot	right	foot	0	0	0	0	0	0	0	0	0	0	0	0	2	0	0	no disease		1		0			0		0	0	0	0	20577	0	0	0	0	0		no disease
0	21-22-F3	21	pre-treatment	2016-04-04	21	22	22F3	expt sheep	F3	Back left	back foot	left	foot	29.6483	0	27.2032	0	35.9223	1	0	0	0	0	1	1	3	0	0	no disease		1				0	0		0	0	0	0	20548	1.48641	0	1.4503	0	1.56729	1.32308	scald
1	21-22-F2	21	pre-treatment	2016-04-04	21	22	22F2	expt sheep	F2	Front right	front foot	right	foot	14.4138	0	0	0	0	0	0	0	0	0	0	0	3	0	0	no disease		1		0			0		0	0	0	0	20548	1.18791	0	0	0	0		no disease
1	13-9-F1	13	pre-treatment	2016-03-07	13	9	9F1	expt sheep	F1	Front left	front foot	left	foot	35.843	0	0	3.88435	0	1	0	0	0	0	0	0	3	0	0	no disease		1	0				0		0	0	0	0	20520	1.56635	0	0	0.688806	0	0.112197	codd
1	5-27-F3	5	pre-treatment	2016-02-08		27	27F3	expt sheep	F3	Back left	back foot	left	foot	0	0	0	0	6.51408	0	0	0	0	0	0	0			0	no disease						0	0		0	0	0	0		0	0	0	0	0.875876	0.336732	no disease
1	51-29-F2	51	post-treatment	2016-07-11	51	29	29F2	expt sheep	F2	Front right	front foot	right	foot	0	0	0	0	0	0	0	0	0	0	0	0	3	2	0	no disease		0		0			0		0	0	0	0	20646	0	0	0	0	0		no disease
1	27-4-F1	27	pre-treatment	2016-04-25	27	4	4F1	expt sheep	F1	Front left	front foot	left	foot	29.2134	346.571	0	4.03622	11.0852	1	0	1	0	0	1	1	3	0	0	no disease		0	0				0		0	0	0	0	20569	1.4802	2.54104	0	0.702105	1.08225	0.70247	codd
1	35-3-F1	35	pre-treatment	2016-05-23	35	3	3F1	expt sheep	F1	Front left	front foot	left	foot	89334.3	19361.1	161687	17044.6	17931.3	1	1	1	1	1	1	1	2	3	footrot	FR		0	0				0		0	1	0	0	20597	4.95102	4.28695	5.20868	4.23161	4.25364	4.8166	codd
1	51-18-F1	51	post-treatment	2016-07-11	51	18	18F1	expt sheep	F1	Front left	front foot	left	foot	0	0	0	0	8.64949	0	0	0	0	0	0	0	3	0	0	no disease		0	0				0		0	0	0	0	20646	0	0	0	0	0.984504	0.459869	no disease
1	51-4-F1	51	post-treatment	2016-07-11		4	4F1	expt sheep	F1	Front left	front foot	left	foot	13.7894	0	0	0	9.04655	0	0	0	0	0	0	0			CODD	CODD	CODD only		5				5	codd5	0	0	1	0		1.16995	0	0	0	1.00202	0.479362	codd
1	7-9-F4	7	pre-treatment	2016-02-15		9	9F4	expt sheep	F4	Back right	back foot	right	foot	0	0	0	0	0	0	0	0	0	0	0	0			0	no disease					0		0		0	0	0	0		0	0	0	0	0		no disease
1	41-14-F3	41	pre-treatment	2016-06-06	41	14	14F3	expt sheep	F3	Back left	back foot	left	foot	21142.2	62918.7	77444.8	8764.02	23944.4	1	1	1	1	1	1	1	2	3	CODD	CODD	CODD only	0				3	3	codd1-4	0	0	1	0	20611	4.32517	4.79879	4.889	3.94275	4.37922	4.56488	codd
1	29-23-F1	29	pre-treatment	2016-05-03	29	23	23F1	expt sheep	F1	Front left	front foot	left	foot	0	0	0	0	7.06655	0	0	0	0	0	0	0	2	3	0	no disease		1	0				0		0	0	0	0	20577	0	0	0	0	0.906688	0.372086	no disease
1	35-9-F4	35	pre-treatment	2016-05-23	35	9	9F4	expt sheep	F4	Back right	back foot	right	foot	0	0	0	0	0	0	0	0	0	0	0	0	2	2	0	no disease		0			0		0		0	0	0	0	20597	0	0	0	0	0		no disease
1	47-29-F4	47	post-treatment	2016-06-27	47	29	29F4	expt sheep	F4	Back right	back foot	right	foot	0	0	0	0	0	0	0	0	0	0	0	0	3	0	0	no disease		1			0		0		0	0	0	0	20632	0	0	0	0	0		scald
1	23-24-F3	23	pre-treatment	2016-04-11	23	24	24F3	expt sheep	F3	Back left	back foot	left	foot	0	0	0	0	0	0	0	0	0	0	0	0	3	0	0	no disease		0				0	0		0	0	0	0	20555	0	0	0	0	0		no disease
1	43-10-F4	43	post-treatment	2016-06-13	43	10	10F4	expt sheep	F4	Back right	back foot	right	foot	10881	1833.33	35080	5704.75	10447.5	1	1	1	1	1	1	1	2	3	fr&CODD	CODD	CODD & footrot	1			1		1	codd1-4	0	0	1	0	20618	4.03671	3.26348	4.54507	3.75631	4.01905	4.23242	codd
1	27-4-F2	27	pre-treatment	2016-04-25	27	4	4F2	expt sheep	F2	Front right	front foot	right	foot	0	176.925	0	0	13.4578	1	0	1	0	0	1	1	3	0	0	no disease		0		0			0		0	0	0	0	20569	0	2.25024	0	0	1.1601	0.651851	scald
1	21-3-F3	21	pre-treatment	2016-04-04	21	3	3F3	expt sheep	F3	Back left	back foot	left	foot	0	0	0	0	0	0	0	0	0	0	0	0	4	0	0	no disease		1				0	0		0	0	0	0	20548	0	0	0	0	0		no disease
1	9-4-F1	9	pre-treatment	2016-02-22	9	4	4F1	expt sheep	F1	Front left	front foot	left	foot	8.21651	0	0	0	0	0	0	0	0	0	0	0	3	0	0	no disease		1	0				0		0	0	0	0	20506	0.964567	0	0	0	0		codd
1	21-8-F1	21	pre-treatment	2016-04-04	21	8	8F1	expt sheep	F1	Front left	front foot	left	foot	0	0	0	0	0	0	0	0	0	0	0	0	3	0	0	no disease		1	0				0		0	0	0	0	20548	0	0	0	0	0		no disease
1	1-15-F4	1	pre-treatment	2016-01-26	1	15	15F4	expt sheep	F4	Back right	back foot	right	foot	10.1871	0	0	0	7.98802	0	0	0	0	0	0	0	2	0	0	no disease		1			0		0		0	0	0	0	20479	1.04872	0	0	0	0.953664	0.425318	footrot
0	1-26-F4	1	pre-treatment	2016-01-26	1	26	26F4	expt sheep	F4	Back right	back foot	right	foot	0	0	0	0	0	0	0	0	0	0	0	0	3	0	WL	other		1			0		0		0	0	0	1	20479	0	0	0	0	0		no disease
1	11-17-F2	11	pre-treatment	2016-02-29	11	17	17F2	expt sheep	F2	Front right	front foot	right	foot	0	0	0	0	0	0	0	0	0	0	0	0	4	0	0	no disease		0		0			0		0	0	0	0	20513	0	0	0	0	0		codd
1	13-14-F1	13	pre-treatment	2016-03-07	13	14	14F1	expt sheep	F1	Front left	front foot	left	foot	0	0	0	0	0	0	0	0	0	0	0	0	3	0	0	no disease		1	0				0		0	0	0	0	20520	0	0	0	0	0		scald
1	11-12-F4	11	pre-treatment	2016-02-29	11	12	12F4	expt sheep	F4	Back right	back foot	right	foot	20.1541	0	0	0	11.048	1	0	0	0	0	1	1	3	0	0	no disease		0			0		0		0	0	0	0	20513	1.32539	0	0	0	1.08091	0.566162	no disease
1	23-27-F4	23	pre-treatment	2016-04-11	23	27	27F4	expt sheep	F4	Back right	back foot	right	foot	77.185	0	0	0	0	1	1	0	0	0	0	0	3	0	0	no disease		0			0		0		0	0	0	0	20555	1.89312	0	0	0	0		scald
1	47-8-F2	47	post-treatment	2016-06-27	47	8	8F2	expt sheep	F2	Front right	front foot	right	foot	10.9197	0	0	0	0	0	0	0	0	0	0	0	3	0	0	no disease		1		0			0		0	0	0	0	20632	1.07627	0	0	0	0		no disease
1	35-1-F1	35	pre-treatment	2016-05-23	35	1	1F1	expt sheep	F1	Front left	front foot	left	foot	24.6379	0	121.804	6.61252	4.07381	1	0	0	1	0	0	1	3	0	0	no disease		0	0				0		0	0	0	0	20597	1.40888	0	2.08921	0.881528	0.705334	1.64506	no disease
1	41-4-F1	41	pre-treatment	2016-06-06	41	4	4F1	expt sheep	F1	Front left	front foot	left	foot	8471.6	49701.7	38348.9	3279.38	8752.42	1	1	1	1	1	1	1	3	3	fr&CODD	CODD	CODD & footrot	0	2				2	codd1-4	0	0	1	0	20611	3.92802	4.69638	4.58376	3.51592	3.94218	4.22514	codd
1	29-16-F4	29	pre-treatment	2016-05-03	29	16	16F4	expt sheep	F4	Back right	back foot	right	foot	27.2288	0	0	0	0	1	0	0	0	0	0	0	3	0	0	no disease		1			0		0		0	0	0	0	20577	1.45069	0	0	0	0		no disease
1	47-28-F4	47	post-treatment	2016-06-27	47	28	28F4	expt sheep	F4	Back right	back foot	right	foot	0	0	0	0	0	0	0	0	0	0	0	0	3	0	0	no disease		1			0		0		0	0	0	0	20632	0	0	0	0	0		scald
1	9-22-F1	9	pre-treatment	2016-02-22	9	22	22F1	expt sheep	F1	Front left	front foot	left	foot	0	0	0	0	0	0	0	0	0	0	0	0	4	0	0	no disease		1	0				0		0	0	0	0	20506	0	0	0	0	0		scald
1	23-14-F2	23	pre-treatment	2016-04-11	23	14	14F2	expt sheep	F2	Front right	front foot	right	foot	0	0	0	0	0	0	0	0	0	0	0	0	3	0	0	no disease		0		0			0		0	0	0	0	20555	0	0	0	0	0		scald
1	17-25-F4	17	pre-treatment	2016-03-21		25	25F4	expt sheep	F4	Back right	back foot	right	foot	21.8327	0	0	0	7.0766	1	0	0	0	0	0	0			0	no disease					0		0		0	0	0	0		1.35856	0	0	0	0.907228	0.372703	no disease
0	29-14-F4	29	pre-treatment	2016-05-03	29	14	14F4	expt sheep	F4	Back right	back foot	right	foot	476.541	1610.11	0	251.889	7.9838	1	1	1	0	1	0	1	2	3	scald	ID		1			0		0		1	0	0	0	20577	2.67901	3.20712	0	2.40293	0.95346	1.93764	codd
1	41-23-F2	41	pre-treatment	2016-06-06	41	23	23F2	expt sheep	F2	Front right	front foot	right	foot	72.8205	0	0	0	0	1	1	0	0	0	0	0	2	2	0	no disease		0		0			0		0	0	0	0	20611	1.86818	0	0	0	0		no disease
0	1-28-F3	1	pre-treatment	2016-01-26	1	28	28F3	expt sheep	F3	Back left	back foot	left	foot	0	0	0	0	0	0	0	0	0	0	0	0	3	0	0	no disease		1				0	0		0	0	0	0	20479	0	0	0	0	0		no disease
1	33-27-F2	33	pre-treatment	2016-05-16	33	27	27F2	expt sheep	F2	Front right	front foot	right	foot	75.6824	0	650.406	36.7114	11.7366	1	1	0	1	1	1	1	3	0	0	no disease		1		0			0		0	0	0	0	20590	1.8847	0	2.81385	1.57647	1.10505	2.36727	no disease
1	33-45-F3	33	pre-treatment	2016-05-16	33	45	45F3	source sheep	F3	Back left	back foot	left	foot	22.4798	0	0	16.8805	0	1	0	0	0	0	0	0	2	3	0	no disease		1				0	0		0	0	0	0	20590	1.37069	0	0	1.25238	0	0.750264
1	30-41-F1	30	pre-treatment	2016-05-04	30	41	41F1	source sheep	F1	Front left	front foot	left	foot	12.4139	0	0	0	7.35505	0	0	0	0	0	0	0	2	3	0	no disease		1	0				0		0	0	0	0	20578	1.12756	0	0	0	0.921949	0.389464
1	13-21-F3	13	pre-treatment	2016-03-07	13	21	21F3	expt sheep	F3	Back left	back foot	left	foot	0	0	0	0	0	0	0	0	0	0	0	0	3	0	0	no disease		1				0	0		0	0	0	0	20520	0	0	0	0	0		no disease
1	9-15-F2	9	pre-treatment	2016-02-22	9	15	15F2	expt sheep	F2	Front right	front foot	right	foot	11.0647	0	0	0	0	0	0	0	0	0	0	0	3	0	0	no disease		1		0			0		0	0	0	0	20506	1.08152	0	0	0	0		codd
1	33-29-F2	33	pre-treatment	2016-05-16	33	29	29F2	expt sheep	F2	Front right	front foot	right	foot	0	0	0	0	0	0	0	0	0	0	0	0	4	0	0	no disease		1		0			0		0	0	0	0	20590	0	0	0	0	0		no disease
1	25-11-F2	25	pre-treatment	2016-04-18	25	11	11F2	expt sheep	F2	Front right	front foot	right	foot	12.1712	0	0	0	0	0	0	0	0	0	0	0	3	0	0	no disease		1		0			0		0	0	0	0	20562	1.11962	0	0	0	0		scald
1	38-2-F1	38	pre-treatment	2016-05-31	38	2	2F1	expt sheep	F1	Front left	front foot	left	foot	0	19844.8	0	0	0	1	0	1	0	0	0	0	3	3	0	no disease		1	0				0		0	0	0	0	20605	0	4.29767	0	0	0		footrot
1	11-25-F3	11	pre-treatment	2016-02-29	11	25	25F3	expt sheep	F3	Back left	back foot	left	foot	22.0435	0	31.4186	6.80422	0	1	0	0	0	0	0	0	3	0	0	no disease		0				0	0		0	0	0	0	20513	1.36255	0	1.51079	0.892329	0	1.1052	no disease
1	5-4-F3	5	pre-treatment	2016-02-08	5	4	4F3	expt sheep	F3	Back left	back foot	left	foot	0	0	0	0	0	0	0	0	0	0	0	0	3	0	0	no disease		1				0	0		0	0	0	0	20492	0	0	0	0	0		no disease
1	29-9-F4	29	pre-treatment	2016-05-03	29	9	9F4	expt sheep	F4	Back right	back foot	right	foot	0	0	0	6.36746	4.55008	0	0	0	0	0	0	0	2	2	0	no disease		1			0		0		0	0	0	0	20577	0	0	0	0.867318	0.744299	0.561003	no disease
1	19-6-F3	19	pre-treatment	2016-03-28	19	6	6F3	expt sheep	F3	Back left	back foot	left	foot	0	0	0	0	0	0	0	0	0	0	0	0	3	0	overgrown	other		0				0	0		0	0	0	1	20541	0	0	0	0	0		no disease
1	27-28-F3	27	pre-treatment	2016-04-25	27	28	28F3	expt sheep	F3	Back left	back foot	left	foot	0	0	0	0	0	0	0	0	0	0	0	0	3	0	0	no disease		0				0	0		0	0	0	0	20569	0	0	0	0	0		no disease
1	23-5-F3	23	pre-treatment	2016-04-11	23	5	5F3	expt sheep	F3	Back left	back foot	left	foot	0	0	68.1701	0	12.6284	1	0	0	1	0	1	1	3	0	0	no disease		0				0	0		0	0	0	0	20555	0	0	1.83992	0	1.13445	1.43028	codd
1	35-28-F4	35	pre-treatment	2016-05-23	35	28	28F4	expt sheep	F4	Back right	back foot	right	foot	14.6147	0	0	0	0	0	0	0	0	0	0	0	3	0	0	no disease		0			0		0		0	0	0	0	20597	1.19353	0	0	0	0		scald
1	51-22-F1	51	post-treatment	2016-07-11	51	22	22F1	expt sheep	F1	Front left	front foot	left	foot	0	0	0	0	0	0	0	0	0	0	0	0	3	0	0	no disease		0	0				0		0	0	0	0	20646	0	0	0	0	0		scald
1	9-11-F4	9	pre-treatment	2016-02-22		11	11F4	expt sheep	F4	Back right	back foot	right	foot	0	0	0	0	2.86112	0	0	0	0	0	0	0			0	no disease					0		0		0	0	0	0		0	0	0	0	0.586714	-0.0205846	no disease
1	19-5-F2	19	pre-treatment	2016-03-28	19	5	5F2	expt sheep	F2	Front right	front foot	right	foot	0	0	0	0	0	0	0	0	0	0	0	0	3	0	scald	ID		0		0			0		1	0	0	0	20541	0	0	0	0	0		codd
1	23-9-F2	23	pre-treatment	2016-04-11	23	9	9F2	expt sheep	F2	Front right	front foot	right	foot	0	1007.17	0	0	5.67167	1	0	1	0	0	0	0	3	0	0	no disease		0		0			0		0	0	0	0	20555	0	3.00354	0	0	0.824234	0.276589	codd
1	41-21-F3	41	pre-treatment	2016-06-06	41	21	21F3	expt sheep	F3	Back left	back foot	left	foot	0	0	0	0	0	0	0	0	0	0	0	0	3	0	0	no disease		0				0	0		0	0	0	0	20611	0	0	0	0	0		no disease
0	11-10-F1	11	pre-treatment	2016-02-29	11	10	10F1	expt sheep	F1	Front left	front foot	left	foot	107.865	0	0	5.94084	13.2947	1	1	0	0	0	1	1	3	0	overgrown	other		0	0				0		0	0	0	1	20513	2.03689	0	0	0.841412	1.15518	0.806984	no disease
1	38-20-F3	38	pre-treatment	2016-05-31	38	20	20F3	expt sheep	F3	Back left	back foot	left	foot	0	0	0	0	0	0	0	0	0	0	0	0	3	0	0	no disease		1				0	0		0	0	0	0	20605	0	0	0	0	0		no disease
1	15-3-F2	15	pre-treatment	2016-03-14	15	3	3F2	expt sheep	F2	Front right	front foot	right	foot	0	0	0	0	0	0	0	0	0	0	0	0	4	0	0	no disease		0		0			0		0	0	0	0	20527	0	0	0	0	0		codd
1	47-4-F4	47	post-treatment	2016-06-27	47	4	4F4	expt sheep	F4	Back right	back foot	right	foot	0	0	0	0	0	0	0	0	0	0	0	0	3	1	0	no disease		1			0		0		0	0	0	0	20632	0	0	0	0	0		no disease
1	27-6-F3	27	pre-treatment	2016-04-25	27	6	6F3	expt sheep	F3	Back left	back foot	left	foot	0	0	0	3.17798	0	0	0	0	0	0	0	0	3	0	0	no disease		0				0	0		0	0	0	0	20569	0	0	0	0.620966	0	0.0250301	no disease
1	9-10-F4	9	pre-treatment	2016-02-22		10	10F4	expt sheep	F4	Back right	back foot	right	foot	0	0	0	0	0	0	0	0	0	0	0	0			0	no disease					0		0		0	0	0	0		0	0	0	0	0		codd
1	13-13-F4	13	pre-treatment	2016-03-07	13	13	13F4	expt sheep	F4	Back right	back foot	right	foot	21.515	0	0	0	0	1	0	0	0	0	0	0	3	0	0	no disease		1			0		0		0	0	0	0	20520	1.35247	0	0	0	0		no disease
1	51-5-F2	51	post-treatment	2016-07-11	51	5	5F2	expt sheep	F2	Front right	front foot	right	foot	0	0	0	0	0	0	0	0	0	0	0	0	3	0	CODD	CODD	CODD only	0		5			5	codd5	0	0	1	0	20646	0	0	0	0	0		codd
1	25-30-F4	25	pre-treatment	2016-04-18	25	30	30F4	expt sheep	F4	Back right	back foot	right	foot	34.6981	0	8.21794	0	0	1	0	0	0	0	0	0	3	0	0	no disease		1			0		0		0	0	0	0	20562	1.55265	0	0.964634	0	0	0.437642	scald
1	15-5-F1	15	pre-treatment	2016-03-14	15	5	5F1	expt sheep	F1	Front left	front foot	left	foot	1454.74	0	0	21.8501	11.2191	1	1	0	0	0	1	1	4	0	0	no disease		0	0				0		0	0	0	0	20527	3.16309	0	0	1.35889	1.08704	1.0423	codd
1	38-28-F2	38	pre-treatment	2016-05-31	38	28	28F2	expt sheep	F2	Front right	front foot	right	foot	10794.1	2044.88	3130.76	1518.02	174.328	1	1	1	1	1	1	1	3	0	0	no disease		1		0			0		0	0	0	0	20605	4.03322	3.31088	3.49579	3.18156	2.24385	3.20621	footrot
1	38-18-F2	38	pre-treatment	2016-05-31	38	18	18F2	expt sheep	F2	Front right	front foot	right	foot	0	0	0	19.458	13.227	0	0	0	0	0	1	1	3	0	0	no disease		1		0			0		0	0	0	0	20605	0	0	0	1.31086	1.15311	1.03723	no disease
1	41-10-F3	41	pre-treatment	2016-06-06	41	10	10F3	expt sheep	F3	Back left	back foot	left	foot	34.7781	0	0	0	6.80585	1	0	0	0	0	0	0	2	3	0	no disease		0				0	0		0	0	0	0	20611	1.55362	0	0	0	0.89242	0.355761	no disease
1	13-28-F1	13	pre-treatment	2016-03-07	13	28	28F1	expt sheep	F1	Front left	front foot	left	foot	0	0	0	0	0	0	0	0	0	0	0	0	3	0	0	no disease		1	0				0		0	0	0	0	20520	0	0	0	0	0		no disease
1	9-5-F4	9	pre-treatment	2016-02-22		5	5F4	expt sheep	F4	Back right	back foot	right	foot	0	0	0	0	0	0	0	0	0	0	0	0			0	no disease					0		0		0	0	0	0		0	0	0	0	0		codd
1	15-14-F4	15	pre-treatment	2016-03-14	15	14	14F4	expt sheep	F4	Back right	back foot	right	foot	25.9116	0	0	0	0	1	0	0	0	0	0	0	3	0	0	no disease		0			0		0		0	0	0	0	20527	1.42994	0	0	0	0		codd
1	25-17-F4	25	pre-treatment	2016-04-18	25	17	17F4	expt sheep	F4	Back right	back foot	right	foot	0	0	0	0	0	0	0	0	0	0	0	0	3	0	0	no disease		1			0		0		0	0	0	0	20562	0	0	0	0	0		scald
1	35-3-F2	35	pre-treatment	2016-05-23	35	3	3F2	expt sheep	F2	Front right	front foot	right	foot	1945.42	6478.7	49033.2	56425.7	9573.48	1	1	1	1	1	1	1	2	3	footrot	FR		0		0			0		0	1	0	0	20597	3.28924	3.81155	4.6905	4.75148	3.98112	4.5837	codd
1	41-10-F2	41	pre-treatment	2016-06-06	41	10	10F2	expt sheep	F2	Front right	front foot	right	foot	0	0	0	2.10265	0	0	0	0	0	0	0	0	2	3	0	no disease		0		0			0		0	0	0	0	20611	0	0	0	0.491733	0	-0.154355	footrot
1	5-27-F2	5	pre-treatment	2016-02-08	5	27	27F2	expt sheep	F2	Front right	front foot	right	foot	43.2396	0	0	0	8.75377	1	0	0	0	0	0	0	3	0	0	no disease		1		0			0		0	0	0	0	20492	1.64581	0	0	0	0.989172	0.465074	no disease
1	15-6-F3	15	pre-treatment	2016-03-14	15	6	6F3	expt sheep	F3	Back left	back foot	left	foot	0	0	0	0	0	0	0	0	0	0	0	0	3	0	0	no disease		0				0	0		0	0	0	0	20527	0	0	0	0	0		no disease
1	41-2-F4	41	pre-treatment	2016-06-06	41	2	2F4	expt sheep	F4	Back right	back foot	right	foot	0	115882	0	0.777439	6.69371	1	0	1	0	0	0	0	3	2	footrot	FR		0			0		0		0	1	0	0	20611	0	5.06402	0	0.249795	0.886136	0.396266	footrot
1	33-4-F4	33	pre-treatment	2016-05-16	33	4	4F4	expt sheep	F4	Back right	back foot	right	foot	0	0	0	0	26.3641	1	0	0	0	0	1	1	3	3	0	no disease		1			0		0		0	0	0	0	20590	0	0	0	0	1.43718	0.943892	no disease
1	19-14-F2	19	pre-treatment	2016-03-28	19	14	14F2	expt sheep	F2	Front right	front foot	right	foot	0	0	0	0	4.16874	0	0	0	0	0	0	0	3	0	0	no disease		0		0			0		0	0	0	0	20541	0	0	0	0	0.713385	0.142884	scald
1	19-17-F1	19	pre-treatment	2016-03-28	19	17	17F1	expt sheep	F1	Front left	front foot	left	foot	0	0	0	0	0	0	0	0	0	0	0	0	4	0	0	no disease		0	0				0		0	0	0	0	20541	0	0	0	0	0		no disease
1	5-13-F3	5	pre-treatment	2016-02-08	5	13	13F3	expt sheep	F3	Back left	back foot	left	foot	7.19145	0	0	0	10.723	0	0	0	0	0	1	1	2	0	0	no disease		1				0	0		0	0	0	0	20492	0.913361	0	0	0	1.06904	0.553195	no disease
1	9-29-F2	9	pre-treatment	2016-02-22	9	29	29F2	expt sheep	F2	Front right	front foot	right	foot	0	0	0	0	0	0	0	0	0	0	0	0	4	0	0	no disease		1					0		0	0	0	0	20506	0	0	0	0	0		no disease
1	41-26-F1	41	pre-treatment	2016-06-06	41	26	26F1	expt sheep	F1	Front left	front foot	left	foot	36.9325	17724.3	0	0	21.1818	1	0	1	0	0	1	1	3	0	0	no disease		0	0				0		0	0	0	0	20611	1.57901	4.24859	0	0	1.346	0.848842	codd
1	29-15-F4	29	pre-treatment	2016-05-03	29	15	15F4	expt sheep	F4	Back right	back foot	right	foot	1428.07	0	0	0	0	1	1	0	0	0	0	0	2	3	0	no disease		1			0		0		0	0	0	0	20577	3.15505	0	0	0	0		footrot
1	23-4-F2	23	pre-treatment	2016-04-11	23	4	4F2	expt sheep	F2	Front right	front foot	right	foot	0	0	0	0	0	0	0	0	0	0	0	0	3	0	0	no disease		0		0			0		0	0	0	0	20555	0	0	0	0	0		scald
1	13-8-F1	13	pre-treatment	2016-03-07	13	8	8F1	expt sheep	F1	Front left	front foot	left	foot	16.3371	0	0	0	0	0	0	0	0	0	0	0	3	0	0	no disease		1	0				0		0	0	0	0	20520	1.23898	0	0	0	0		no disease
1	43-8-F1	43	post-treatment	2016-06-13	43	8	8F1	expt sheep	F1	Front left	front foot	left	foot	0	176.832	0	23.198	0	1	0	1	0	0	0	0	2	2	0	no disease		1	0				0		0	0	0	0	20618	0	2.25001	0	1.38378	0	0.88833	no disease
1	11-7-F1	11	pre-treatment	2016-02-29	11	7	7F1	expt sheep	F1	Front left	front foot	left	foot	0	0	0	0	0	0	0	0	0	0	0	0	4	0	0	no disease		0	0				0		0	0	0	0	20513	0	0	0	0	0		codd
1	1-1-F4	1	pre-treatment	2016-01-26	1	1	1F4	expt sheep	F4	Back right	back foot	right	foot	0	0	0	0	0	0	0	0	0	0	0	0	2	0	0	no disease		1			0		0		0	0	0	0	20479	0	0	0	0	0		no disease
1	51-7-F1	51	post-treatment	2016-07-11	51	7	7F1	expt sheep	F1	Front left	front foot	left	foot	0	0	0	0	0	0	0	0	0	0	0	0	2	0	0	no disease		0	0				0		0	0	0	0	20646	0	0	0	0	0		codd
1	21-2-F2	21	pre-treatment	2016-04-04	21	2	2F2	expt sheep	F2	Front right	front foot	right	foot	420.324	0	0	0	0	1	1	0	0	0	0	0	4	0	0	no disease		1		0			0		0	0	0	0	20548	2.62462	0	0	0	0		codd
0	3-39-F4	3	pre-treatment	2016-02-03	3	39	39F4	source sheep	F4	Back right	back foot	right	foot	0	0	0	0	0	0	0	0	0	0	0	0	1	3	0	no disease		1			0		0		0	0	0	0	20487	0	0	0	0	0
1	31-27-F4	31	pre-treatment	2016-05-09	31	27	27F4	expt sheep	F4	Back right	back foot	right	foot	0	0	0	0	0	0	0	0	0	0	0	0	3	0	0	no disease		0			0		0		0	0	0	0	20583	0	0	0	0	0		scald
1	43-28-F4	43	post-treatment	2016-06-13	43	28	28F4	expt sheep	F4	Back right	back foot	right	foot	25.1865	0	164.653	6.15083	7.6982	1	0	0	1	0	0	1	3	3	0	no disease		1			0		0		0	0	0	0	20618	1.41808	0	2.2192	0.854357	0.939429	1.77452	scald
1	9-14-F3	9	pre-treatment	2016-02-22	9	14	14F3	expt sheep	F3	Back left	back foot	left	foot	25.5954	0	0	0	0	1	0	0	0	0	0	0	3	0	0	no disease		1					0		0	0	0	0	20506	1.42481	0	0	0	0		codd
1	43-18-F3	43	post-treatment	2016-06-13	43	18	18F3	expt sheep	F3	Back left	back foot	left	foot	20.5858	0	61.3521	0	0	1	0	0	1	0	0	1	3	0	0	no disease		1				0	0		0	0	0	0	20618	1.33417	0	1.79485	0	0	1.31071	no disease
0	35-20-F3	35	pre-treatment	2016-05-23	35	20	20F3	expt sheep	F3	Back left	back foot	left	foot	0	0	0	0	10.1318	0	0	0	0	0	0	0	2	0	0	no disease		0				0	0		0	0	0	0	20597	0	0	0	0	1.04657	0.528566	no disease
1	11-8-F3	11	pre-treatment	2016-02-29	11	8	8F3	expt sheep	F3	Back left	back foot	left	foot	0	0	0	0	0	0	0	0	0	0	0	0	3	0	0	no disease		0				0	0		0	0	0	0	20513	0	0	0	0	0		codd
1	38-14-F2	38	pre-treatment	2016-05-31	38	14	14F2	expt sheep	F2	Front right	front foot	right	foot	0	0	19.8552	29.6483	9.03699	1	0	0	0	1	0	1	2	3	0	no disease		1		0			0		0	0	0	0	20605	0	0	1.31921	1.48641	1.0016	1.29034	scald
1	17-26-F1	17	pre-treatment	2016-03-21	17	26	26F1	expt sheep	F1	Front left	front foot	left	foot	0	0	0	0	0	0	0	0	0	0	0	0	4	0	0	no disease		1	0				0		0	0	0	0	20534	0	0	0	0	0		codd
1	15-12-F3	15	pre-treatment	2016-03-14	15	12	12F3	expt sheep	F3	Back left	back foot	left	foot	49.5024	0	0	0	0	1	1	0	0	0	0	0	3	0	0	no disease		0				0	0		0	0	0	0	20527	1.70331	0	0	0	0		codd
1	15-4-F3	15	pre-treatment	2016-03-14	15	4	4F3	expt sheep	F3	Back left	back foot	left	foot	0	0	0	0	0	0	0	0	0	0	0	0	4	0	0	no disease		0				0	0		0	0	0	0	20527	0	0	0	0	0		no disease
1	51-28-F4	51	post-treatment	2016-07-11	51	28	28F4	expt sheep	F4	Back right	back foot	right	foot	0	0	0	0	0	0	0	0	0	0	0	0	3	0	0	no disease		0			0		0		0	0	0	0	20646	0	0	0	0	0		scald
1	7-12-F1	7	pre-treatment	2016-02-15	7	12	12F1	expt sheep	F1	Front left	front foot	left	foot	0	0	0	0	0	0	0	0	0	0	0	0	4	0	0	no disease		0	0				0		0	0	0	0	20499	0	0	0	0	0		no disease
1	19-27-F2	19	pre-treatment	2016-03-28	19	27	27F2	expt sheep	F2	Front right	front foot	right	foot	0	0	0	0	0	0	0	0	0	0	0	0	4	0	0	no disease		0		0			0		0	0	0	0	20541	0	0	0	0	0		no disease
1	19-15-F4	19	pre-treatment	2016-03-28	19	15	15F4	expt sheep	F4	Back right	back foot	right	foot	23.9526	128.209	1306.64	17.653	239.488	1	0	1	1	0	1	1	3	3	0	no disease		0			0		0		0	0	0	0	20541	1.39712	2.11129	3.11649	1.27075	2.38109	2.71705	footrot
1	35-8-F4	35	pre-treatment	2016-05-23	35	8	8F4	expt sheep	F4	Back right	back foot	right	foot	28575.7	86245.6	149315	59765.4	86450.8	1	1	1	1	1	1	1	2	3	scald	ID		0			0		0		1	0	0	0	20597	4.45601	4.93574	5.17411	4.77646	4.93677	4.99348	scald
0	29-3-F3	29	pre-treatment	2016-05-03	29	3	3F3	expt sheep	F3	Back left	back foot	left	foot	0	70.0807	706.603	1.2177	0	1	0	1	1	0	0	1	2	2	0	no disease		1				0	0		0	0	0	0	20577	0	1.85175	2.84979	0.345903	0	2.3728	no disease
1	41-30-F3	41	pre-treatment	2016-06-06	41	30	30F3	expt sheep	F3	Back left	back foot	left	foot	62.5628	0	54.6087	8.7273	8.97588	1	1	0	1	0	0	1	3	0	scald	ID		0				0	0		1	0	0	0	20611	1.8032	0	1.74514	0.987992	0.998951	1.38209	scald
1	33-23-F3	33	pre-treatment	2016-05-16	33	23	23F3	expt sheep	F3	Back left	back foot	left	foot	0	0	0	0	0	0	0	0	0	0	0	0	2	3	0	no disease		1				0	0		0	0	0	0	20590	0	0	0	0	0		codd
1	47-12-F2	47	post-treatment	2016-06-27	47	12	12F2	expt sheep	F2	Front right	front foot	right	foot	0	0	0	0	0	0	0	0	0	0	0	0	2	1	CODD	CODD	CODD only	1		5			5	codd5	0	0	1	0	20632	0	0	0	0	0		codd
1	5-8-F1	5	pre-treatment	2016-02-08	5	8	8F1	expt sheep	F1	Front left	front foot	left	foot	0	0	0	3.16454	4.29174	0	0	0	0	0	0	0	3	0	0	no disease		1	0				0		0	0	0	0	20492	0	0	0	0.619567	0.723598	0.395401	no disease
1	13-15-F1	13	pre-treatment	2016-03-07	13	15	15F1	expt sheep	F1	Front left	front foot	left	foot	116.297	0	0	0	0	1	1	0	0	0	0	0	3	0	0	no disease		1	0				0		0	0	0	0	20520	2.06929	0	0	0	0		codd
0	17-10-F1	17	pre-treatment	2016-03-21	17	10	10F1	expt sheep	F1	Front left	front foot	left	foot	0	0	0	0	0	0	0	0	0	0	0	0	3	0	0	no disease		1	0				0		0	0	0	0	20534	0	0	0	0	0		no disease
1	51-25-F4	51	post-treatment	2016-07-11	51	25	25F4	expt sheep	F4	Back right	back foot	right	foot	0	0	0	0	0	0	0	0	0	0	0	0	3	0	0	no disease		0			0		0		0	0	0	0	20646	0	0	0	0	0		no disease
1	13-7-F4	13	pre-treatment	2016-03-07	13	7	7F4	expt sheep	F4	Back right	back foot	right	foot	0	0	0	0	0	0	0	0	0	0	0	0	3	0	0	no disease		1			0		0		0	0	0	0	20520	0	0	0	0	0		scald
1	15-13-F1	15	pre-treatment	2016-03-14	15	13	13F1	expt sheep	F1	Front left	front foot	left	foot	0	0	0	0	0	0	0	0	0	0	0	0	2	0	0	no disease		0	0				0		0	0	0	0	20527	0	0	0	0	0		no disease
1	51-21-F2	51	post-treatment	2016-07-11	51	21	21F2	expt sheep	F2	Front right	front foot	right	foot	8.47072	0	0	0	5.80422	0	0	0	0	0	0	0	3	0	0	no disease		0		0			0		0	0	0	0	20646	0.976383	0	0	0	0.832779	0.286623	no disease
0	1-6-F3	1	pre-treatment	2016-01-26	1	6	6F3	expt sheep	F3	Back left	back foot	left	foot	0	0	0	0	0	0	0	0	0	0	0	0	3	0	0	no disease		1				0	0		0	0	0	0	20479	0	0	0	0	0		no disease
1	17-16-F4	17	pre-treatment	2016-03-21		16	16F4	expt sheep	F4	Back right	back foot	right	foot	0	0	23.417	0	7.58245	1	0	0	0	0	0	0			0	no disease					0		0		0	0	0	0		0	0	1.38769	0	0.933611	1.01423	no disease
1	38-17-F4	38	pre-treatment	2016-05-31	38	17	17F4	expt sheep	F4	Back right	back foot	right	foot	47.4425	0	0	18.6997	17.6266	1	1	0	0	0	1	1	3	0	0	no disease		1			0		0		0	0	0	0	20605	1.68523	0	0	1.29446	1.27013	1.0831	scald
1	35-14-F1	35	pre-treatment	2016-05-23	35	14	14F1	expt sheep	F1	Front left	front foot	left	foot	0	0	0	1.24826	0	0	0	0	0	0	0	0	1	3	0	no disease		0	0				0		0	0	0	0	20597	0	0	0	0.351847	0	-0.380815	scald
1	47-23-F3	47	post-treatment	2016-06-27	47	23	23F3	expt sheep	F3	Back left	back foot	left	foot	29.8899	0	0	0	0	1	0	0	0	0	0	0	2	1	0	no disease		1				0	0		0	0	0	0	20632	1.48982	0	0	0	0		codd
1	5-21-F3	5	pre-treatment	2016-02-08	5	21	21F3	expt sheep	F3	Back left	back foot	left	foot	0	0	0	0	0	0	0	0	0	0	0	0	3	0	0	no disease		1				0	0		0	0	0	0	20492	0	0	0	0	0		no disease
1	19-11-F4	19	pre-treatment	2016-03-28	19	11	11F4	expt sheep	F4	Back right	back foot	right	foot	0	0	0	0	0	0	0	0	0	0	0	0	3	0	0	no disease		0			0		0		0	0	0	0	20541	0	0	0	0	0		no disease
0	3-37-F4	3	pre-treatment	2016-02-02	3	37	37F4	source sheep	F4	Back right	back foot	right	foot	0	0	407.953	0	50.8331	1	0	0	1	0	1	1	2	3	0	no disease		1			0		0		0	0	0	0	20486	0	0	2.61167	0	1.71461	2.18449
1	33-27-F1	33	pre-treatment	2016-05-16	33	27	27F1	expt sheep	F1	Front left	front foot	left	foot	0	0	0	7.6954	2.58717	0	0	0	0	0	0	0	3	0	0	no disease		1	0				0		0	0	0	0	20590	0	0	0	0.93929	0.554752	0.53498	no disease
1	35-28-F2	35	pre-treatment	2016-05-23	35	28	28F2	expt sheep	F2	Front right	front foot	right	foot	957.923	0	17.5082	0	4.97946	1	1	0	0	0	0	0	3	0	0	no disease		0		0			0		0	0	0	0	20597	2.98178	0	1.26737	0	0.776662	0.874824	footrot
1	21-30-F1	21	pre-treatment	2016-04-04	21	30	30F1	expt sheep	F1	Front left	front foot	left	foot	0	0	0	0	8.3008	0	0	0	0	0	0	0	3	0	0	no disease		1	0				0		0	0	0	0	20548	0	0	0	0	0.96852	0.441999	footrot
1	17-18-F4	17	pre-treatment	2016-03-21		18	18F4	expt sheep	F4	Back right	back foot	right	foot	0	0	0	0	0	0	0	0	0	0	0	0			0	no disease					0		0		0	0	0	0		0	0	0	0	0		no disease
1	13-5-F1	13	pre-treatment	2016-03-07	13	5	5F1	expt sheep	F1	Front left	front foot	left	foot	1852.11	75.2516	0	0	7.96764	1	1	1	0	0	0	0	3	0	0	no disease		1	0				0		0	0	0	0	20520	3.2679	1.88225	0	0	0.952678	0.424208	codd
1	7-11-F3	7	pre-treatment	2016-02-15	7	11	11F3	expt sheep	F3	Back left	back foot	left	foot	0	0	0	0	0	0	0	0	0	0	0	0	4	0	0	no disease		0				0	0		0	0	0	0	20499	0	0	0	0	0		scald
1	13-14-F4	13	pre-treatment	2016-03-07	13	14	14F4	expt sheep	F4	Back right	back foot	right	foot	0	0	0	0	0	0	0	0	0	0	0	0	3	0	0	no disease		1			0		0		0	0	0	0	20520	0	0	0	0	0		codd
1	11-15-F4	11	pre-treatment	2016-02-29	11	15	15F4	expt sheep	F4	Back right	back foot	right	foot	0	0	0	0	0	0	0	0	0	0	0	0	4	0	0	no disease		0			0		0		0	0	0	0	20513	0	0	0	0	0		footrot
1	25-5-F1	25	pre-treatment	2016-04-18	25	5	5F1	expt sheep	F1	Front left	front foot	left	foot	3845.26	16416	0	0	71.3838	1	1	1	0	0	1	1	3	0	0	no disease		1	0				0		0	0	0	0	20562	3.58504	4.21529	0	0	1.85964	1.37648	codd
1	15-15-F1	15	pre-treatment	2016-03-14	15	15	15F1	expt sheep	F1	Front left	front foot	left	foot	837.949	495.059	0	0	0	1	1	1	0	0	0	0	2	2	0	no disease		0	0				0		0	0	0	0	20527	2.92374	2.69553	0	0	0		codd
1	15-4-F2	15	pre-treatment	2016-03-14	15	4	4F2	expt sheep	F2	Front right	front foot	right	foot	0	0	0	0	0	0	0	0	0	0	0	0	4	0	0	no disease		0		0			0		0	0	0	0	20527	0	0	0	0	0		scald
1	25-8-F4	25	pre-treatment	2016-04-18	25	8	8F4	expt sheep	F4	Back right	back foot	right	foot	0	0	0	0	0	0	0	0	0	0	0	0	3	2	0	no disease		1			0		0		0	0	0	0	20562	0	0	0	0	0		scald
1	5-12-F3	5	pre-treatment	2016-02-08	5	12	12F3	expt sheep	F3	Back left	back foot	left	foot	0	0	0	0	0	0	0	0	0	0	0	0	3	0	0	no disease		1				0	0		0	0	0	0	20492	0	0	0	0	0		codd
1	41-7-F3	41	pre-treatment	2016-06-06	41	7	7F3	expt sheep	F3	Back left	back foot	left	foot	25.4922	191.802	50.4164	0	5.59352	1	0	1	1	0	0	1	2	3	0	no disease		0				0	0		0	0	0	0	20611	1.42312	2.28511	1.7111	0	0.819117	1.27114	scald
1	5-9-F2	5	pre-treatment	2016-02-08	5	9	9F2	expt sheep	F2	Front right	front foot	right	foot	32.5926	0	59.0383	23.6881	30.2582	1	0	0	1	0	1	1	3	0	0	no disease		1		0			0		0	0	0	0	20492	1.52624	0	1.77843	1.39249	1.49496	1.5759	codd
1	47-4-F1	47	post-treatment	2016-06-27	47	4	4F1	expt sheep	F1	Front left	front foot	left	foot	0	0	0	0	0	0	0	0	0	0	0	0	3	1	CODD	CODD	CODD only	1	5				5	codd5	0	0	1	0	20632	0	0	0	0	0		codd
1	47-28-F3	47	post-treatment	2016-06-27	47	28	28F3	expt sheep	F3	Back left	back foot	left	foot	43.0678	0	0	0	0	1	0	0	0	0	0	0	3	0	0	no disease		1				0	0		0	0	0	0	20632	1.64412	0	0	0	0		no disease
1	43-22-F1	43	post-treatment	2016-06-13	43	22	22F1	expt sheep	F1	Front left	front foot	left	foot	21.5685	0	0	0	3.73067	1	0	0	0	0	0	0	3	0	scald	ID		1	0				0		1	0	0	0	20618	1.3535	0	0	0	0.674923	0.0946657	scald
1	15-13-F3	15	pre-treatment	2016-03-14	15	13	13F3	expt sheep	F3	Back left	back foot	left	foot	207.779	0	88.52	4.4893	53.4141	1	1	0	1	0	1	1	2	0	0	no disease		0				0	0		0	0	0	0	20527	2.31969	0	1.95192	0.739517	1.73571	1.68849	no disease
1	9-14-F4	9	pre-treatment	2016-02-22		14	14F4	expt sheep	F4	Back right	back foot	right	foot	0	0	0	0	0	0	0	0	0	0	0	0			0	no disease					0		0		0	0	0	0		0	0	0	0	0		codd
0	35-5-F4	35	pre-treatment	2016-05-23	35	5	5F4	expt sheep	F4	Back right	back foot	right	foot	69913.2	12034.6	0	108336	0	1	1	1	0	1	0	1	2	3	0	no disease		0			0		0		0	0	0	0	20597	4.84457	4.08047	0	5.03478	0	4.55765	codd
1	5-1-F4	5	pre-treatment	2016-02-08	5	1	1F4	expt sheep	F4	Back right	back foot	right	foot	0	0	0	0	0	0	0	0	0	0	0	0	3	0	0	no disease		1			0		0		0	0	0	0	20492	0	0	0	0	0		no disease
1	11-11-F4	11	pre-treatment	2016-02-29	11	11	11F4	expt sheep	F4	Back right	back foot	right	foot	0	0	0	0	0	0	0	0	0	0	0	0	3	0	0	no disease		0			0		0		0	0	0	0	20513	0	0	0	0	0		no disease
1	41-27-F1	41	pre-treatment	2016-06-06	41	27	27F1	expt sheep	F1	Front left	front foot	left	foot	0	0	0	26.9127	8.16243	1	0	0	0	1	0	1	3	0	0	no disease		0	0				0		0	0	0	0	20611	0	0	0	1.4458	0.962011	1.06788	no disease
1	23-6-F3	23	pre-treatment	2016-04-11	23	6	6F3	expt sheep	F3	Back left	back foot	left	foot	0	0	0	0	0	0	0	0	0	0	0	0	3	0	overgrown	other		0				0	0		0	0	0	1	20555	0	0	0	0	0		no disease
0	1-25-F3	1	pre-treatment	2016-01-26	1	25	25F3	expt sheep	F3	Back left	back foot	left	foot	0	0	0	0	0	0	0	0	0	0	0	0	2	0	0	no disease		1				0	0		0	0	0	0	20479	0	0	0	0	0		no disease
1	13-6-F4	13	pre-treatment	2016-03-07	13	6	6F4	expt sheep	F4	Back right	back foot	right	foot	0	24431.1	0	3.03606	0	1	0	1	0	0	0	0	3	0	0	no disease		1			0		0		0	0	0	0	20520	0	4.38796	0	0.605958	0	0.00518948	no disease
1	38-22-F4	38	pre-treatment	2016-05-31	38	22	22F4	expt sheep	F4	Back right	back foot	right	foot	0	0	0	0	0	0	0	0	0	0	0	0	3	0	0	no disease		1			0		0		0	0	0	0	20605	0	0	0	0	0		no disease
1	51-30-F1	51	post-treatment	2016-07-11	51	30	30F1	expt sheep	F1	Front left	front foot	left	foot	72171.5	0	0	9624.65	113121	1	1	0	0	1	1	1	3	3	footrot	FR		0	0				0		0	1	0	0	20646	4.85837	0	0	3.98343	5.05355	4.61188	footrot
1	9-23-F2	9	pre-treatment	2016-02-22	9	23	23F2	expt sheep	F2	Front right	front foot	right	foot	0	0	0	0	0	0	0	0	0	0	0	0	3	0	0	no disease		1					0		0	0	0	0	20506	0	0	0	0	0		no disease
1	29-10-F2	29	pre-treatment	2016-05-03	29	10	10F2	expt sheep	F2	Front right	front foot	right	foot	0	45.0014	36.6987	3.33483	9.15149	1	0	0	1	0	0	1	3	0	0	no disease		1		0			0		0	0	0	0	20577	0	1.66277	1.57633	0.636972	1.00653	1.21471	footrot
0	29-3-F4	29	pre-treatment	2016-05-03	29	3	3F4	expt sheep	F4	Back right	back foot	right	foot	0	0	59.3578	0	0	1	0	0	1	0	0	1	2	2	0	no disease		1			0		0		0	0	0	0	20577	0	0	1.78073	0	0	1.29636	no disease
1	43-18-F4	43	post-treatment	2016-06-13	43	18	18F4	expt sheep	F4	Back right	back foot	right	foot	0	0	0	0	0	0	0	0	0	0	0	0	3	0	0	no disease		1			0		0		0	0	0	0	20618	0	0	0	0	0		no disease
1	35-13-F2	35	pre-treatment	2016-05-23	35	13	13F2	expt sheep	F2	Front right	front foot	right	foot	0	0	19.7161	1.86015	0	0	0	0	0	0	0	0	3	0	0	no disease		0		0			0		0	0	0	0	20597	0	0	1.31631	0.456389	0	0.856855	no disease
1	17-22-F4	17	pre-treatment	2016-03-21		22	22F4	expt sheep	F4	Back right	back foot	right	foot	0	0	0	0	0	0	0	0	0	0	0	0			0	no disease					0		0		0	0	0	0		0	0	0	0	0		no disease
1	5-17-F2	5	pre-treatment	2016-02-08	5	17	17F2	expt sheep	F2	Front right	front foot	right	foot	0	0	0	0	0	0	0	0	0	0	0	0	3	0	0	no disease		1		0			0		0	0	0	0	20492	0	0	0	0	0		codd
0	29-2-F1	29	pre-treatment	2016-05-03	29	2	2F1	expt sheep	F1	Front left	front foot	left	foot	0	40707.6	0	0.718016	0	1	0	1	0	0	0	0	2	3	footrot	FR		1	0				0		0	1	0	0	20577	0	4.60969	0	0.235027	0	-0.620987	footrot
1	21-29-F3	21	pre-treatment	2016-04-04	21	29	29F3	expt sheep	F3	Back left	back foot	left	foot	84.6786	0	17.2454	0	8.25589	1	1	0	0	0	0	0	4	0	0	no disease		1				0	0		0	0	0	0	20548	1.93287	0	1.26115	0	0.966418	0.929442	no disease
1	38-30-F3	38	pre-treatment	2016-05-31	38	30	30F3	expt sheep	F3	Back left	back foot	left	foot	0	0	0	0	0	0	0	0	0	0	0	0	3	0	0	no disease		1				0	0		0	0	0	0	20605	0	0	0	0	0		scald
1	23-27-F1	23	pre-treatment	2016-04-11	23	27	27F1	expt sheep	F1	Front left	front foot	left	foot	0	0	0	0	0	0	0	0	0	0	0	0	3	0	0	no disease		0	0				0		0	0	0	0	20555	0	0	0	0	0		no disease
1	13-19-F3	13	pre-treatment	2016-03-07	13	19	19F3	expt sheep	F3	Back left	back foot	left	foot	17.6624	0	0	0	0	0	0	0	0	0	0	0	3	0	0	no disease		1				0	0		0	0	0	0	20520	1.27097	0	0	0	0		no disease
1	51-18-F3	51	post-treatment	2016-07-11	51	18	18F3	expt sheep	F3	Back left	back foot	left	foot	0	0	0	0	0	0	0	0	0	0	0	0	3	0	0	no disease		0				0	0		0	0	0	0	20646	0	0	0	0	0		no disease
1	38-6-F1	38	pre-treatment	2016-05-31	38	6	6F1	expt sheep	F1	Front left	front foot	left	foot	87154.5	50958.9	711342	178062	28877.5	1	1	1	1	1	1	1	2	3	fr&CODD	CODD	CODD & footrot	1	1				1	codd1-4	0	0	1	0	20605	4.94029	4.70723	5.85208	5.25057	4.46057	5.48585	codd
1	21-6-F3	21	pre-treatment	2016-04-04	21	6	6F3	expt sheep	F3	Back left	back foot	left	foot	0	0	0	0	0	0	0	0	0	0	0	0	3	0	overgrown	other		1				0	0		0	0	0	1	20548	0	0	0	0	0		no disease
0	3-34-F4	3	pre-treatment	2016-02-02	3	34	34F4	source sheep	F4	Back right	back foot	right	foot	0	0	0	0	5.78998	0	0	0	0	0	0	0	2	3	0	no disease		1			0		0		0	0	0	0	20486	0	0	0	0	0.831868	0.285555
1	33-7-F4	33	pre-treatment	2016-05-16	33	7	7F4	expt sheep	F4	Back right	back foot	right	foot	0	68.5447	27.5309	6.44281	29.0509	1	0	1	0	0	1	1	3	3	0	no disease		1			0		0		0	0	0	0	20590	0	1.84226	1.45531	0.871737	1.47786	1.32239	scald
1	33-6-F2	33	pre-treatment	2016-05-16	33	6	6F2	expt sheep	F2	Front right	front foot	right	foot	0	0	35.3004	0	0	1	0	0	1	0	0	1	3	3	0	no disease		1		0			0		0	0	0	0	20590	0	0	1.55991	0	0	1.07066	footrot
1	35-29-F2	35	pre-treatment	2016-05-23	35	29	29F2	expt sheep	F2	Front right	front foot	right	foot	0	0	0	0	0	0	0	0	0	0	0	0	3	0	0	no disease		0		0			0		0	0	0	0	20597	0	0	0	0	0		no disease
1	13-10-F2	13	pre-treatment	2016-03-07	13	10	10F2	expt sheep	F2	Front right	front foot	right	foot	0	0	0	0	0	0	0	0	0	0	0	0	3	0	0	no disease		1		0			0		0	0	0	0	20520	0	0	0	0	0		footrot
1	25-18-F2	25	pre-treatment	2016-04-18	25	18	18F2	expt sheep	F2	Front right	front foot	right	foot	0	0	0	0	0	0	0	0	0	0	0	0	3	0	0	no disease		1		0			0		0	0	0	0	20562	0	0	0	0	0		no disease
1	19-25-F2	19	pre-treatment	2016-03-28	19	25	25F2	expt sheep	F2	Front right	front foot	right	foot	0	0	0	0	0	0	0	0	0	0	0	0	4	0	0	no disease		0		0			0		0	0	0	0	20541	0	0	0	0	0		no disease
1	17-30-F4	17	pre-treatment	2016-03-21		30	30F4	expt sheep	F4	Back right	back foot	right	foot	85.462	0	0	3.89138	3.67542	1	1	0	0	0	0	0			0	no disease					0		0		0	0	0	0		1.93683	0	0	0.689432	0.669821	0.401791	scald
1	27-11-F2	27	pre-treatment	2016-04-25	27	11	11F2	expt sheep	F2	Front right	front foot	right	foot	0	0	0	0	0	0	0	0	0	0	0	0	3	0	0	no disease		0		0			0		0	0	0	0	20569	0	0	0	0	0		scald
1	9-7-F3	9	pre-treatment	2016-02-22	9	7	7F3	expt sheep	F3	Back left	back foot	left	foot	0	0	0	0	0	0	0	0	0	0	0	0	3	0	0	no disease		1					0		0	0	0	0	20506	0	0	0	0	0		scald
1	33-46-F2	33	pre-treatment	2016-05-16	33	46	46F2	source sheep	F2	Front right	front foot	right	foot	13.8818	34.803	53.6755	88.2604	6.76427	1	0	0	1	1	0	1	2	3	0	no disease		1		0			0		0	0	0	0	20590	1.17266	1.55392	1.73779	1.95066	0.890101	1.69519
1	13-20-F1	13	pre-treatment	2016-03-07	13	20	20F1	expt sheep	F1	Front left	front foot	left	foot	0	0	0	0	0	0	0	0	0	0	0	0	3	0	0	no disease		1	0				0		0	0	0	0	20520	0	0	0	0	0		no disease
1	51-27-F1	51	post-treatment	2016-07-11	51	27	27F1	expt sheep	F1	Front left	front foot	left	foot	52.5825	0	0	0	13.0092	1	1	0	0	0	1	1	3	1	0	no disease		0	0				0		0	0	0	0	20646	1.72902	0	0	0	1.14641	0.637129	no disease
1	23-15-F4	23	pre-treatment	2016-04-11	23	15	15F4	expt sheep	F4	Back right	back foot	right	foot	0	0	0	0	5.18775	0	0	0	0	0	0	0	3	3	0	no disease		0			0		0		0	0	0	0	20555	0	0	0	0	0.791533	0.237858	footrot
1	33-47-F4	33	pre-treatment	2016-05-16	33	47	47F4	source sheep	F4	Back right	back foot	right	foot	32.0775	232.12	29.045	8.81691	12.4585	1	0	1	0	0	1	1	3	3	0	no disease		1			0		0		0	0	0	0	20590	1.51953	2.36758	1.47777	0.991975	1.129	1.22462
1	30-42-F4	30	pre-treatment	2016-05-04	30	42	42F4	source sheep	F4	Back right	back foot	right	foot	405.842	0	99.8621	60.3753	20.4028	1	1	0	1	1	1	1	2	3	0	no disease		1			0		0		0	0	0	0	20578	2.60943	0	2.00373	1.78799	1.33047	1.77969
1	9-2-F4	9	pre-treatment	2016-02-22		2	2F4	expt sheep	F4	Back right	back foot	right	foot	0	0	0	0	0	0	0	0	0	0	0	0			0	no disease					0		0		0	0	0	0		0	0	0	0	0		footrot
0	1-6-F1	1	pre-treatment	2016-01-26	1	6	6F1	expt sheep	F1	Front left	front foot	left	foot	0	0	0	0	0	0	0	0	0	0	0	0	3	0	0	no disease		1	0				0		0	0	0	0	20479	0	0	0	0	0		codd
1	31-20-F1	31	pre-treatment	2016-05-09	31	20	20F1	expt sheep	F1	Front left	front foot	left	foot	0	0	0	0	0	0	0	0	0	0	0	0	3	0	0	no disease		0	0				0		0	0	0	0	20583	0	0	0	0	0		no disease
1	9-11-F1	9	pre-treatment	2016-02-22	9	11	11F1	expt sheep	F1	Front left	front foot	left	foot	25.1919	0	0	0	0	1	0	0	0	0	0	0	3	0	0	no disease		1	0				0		0	0	0	0	20506	1.41817	0	0	0	0		scald
1	25-29-F4	25	pre-treatment	2016-04-18	25	29	29F4	expt sheep	F4	Back right	back foot	right	foot	12.4911	0	0	0	0	0	0	0	0	0	0	0	3	0	0	no disease		1			0		0		0	0	0	0	20562	1.13005	0	0	0	0		scald
1	41-12-F4	41	pre-treatment	2016-06-06	41	12	12F4	expt sheep	F4	Back right	back foot	right	foot	0	0	0	4.61669	8.70519	0	0	0	0	0	0	0	2	3	0	no disease		0			0		0		0	0	0	0	20611	0	0	0	0.749481	0.987004	0.647444	no disease
0	1-2-F2	1	pre-treatment	2016-01-26	1	2	2F2	expt sheep	F2	Front right	front foot	right	foot	0	0	0	0	0	0	0	0	0	0	0	0	3	0	0	no disease		1		0			0		0	0	0	0	20479	0	0	0	0	0		codd
0	3-38-F4	3	pre-treatment	2016-02-02	3	38	38F4	source sheep	F4	Back right	back foot	right	foot	0	0	386955	8706.48	24210.7	1	0	0	1	1	1	1	2	3	CODD	CODD	CODD only	1			2		2	codd1-4	0	0	1	0	20486	0	0	5.58766	3.93989	4.38402	5.146
1	17-2-F4	17	pre-treatment	2016-03-21		2	2F4	expt sheep	F4	Back right	back foot	right	foot	0	0	0	0	9.80629	0	0	0	0	0	0	0			0	no disease					0		0		0	0	0	0		0	0	0	0	1.03368	0.514383	footrot
1	19-4-F2	19	pre-treatment	2016-03-28	19	4	4F2	expt sheep	F2	Front right	front foot	right	foot	0	0	0	3.80198	0	0	0	0	0	0	0	0	4	0	0	no disease		0		0			0		0	0	0	0	20541	0	0	0	0.68142	0	0.102888	scald
1	15-7-F4	15	pre-treatment	2016-03-14	15	7	7F4	expt sheep	F4	Back right	back foot	right	foot	0	0	0	0	0	0	0	0	0	0	0	0	4	0	scald	ID		0			0		0		1	0	0	0	20527	0	0	0	0	0		scald
1	7-22-F2	7	pre-treatment	2016-02-15	7	22	22F2	expt sheep	F2	Front right	front foot	right	foot	21.2144	0	0	4.84876	0	1	0	0	0	0	0	0	5	0	0	no disease		0		0			0		0	0	0	0	20499	1.34663	0	0	0.767063	0	0.208509	no disease
0	17-11-F4	17	pre-treatment	2016-03-21		11	11F4	expt sheep	F4	Back right	back foot	right	foot	0	0	0	0	0	0	0	0	0	0	0	0			0	no disease					0		0		0	0	0	0		0	0	0	0	0		no disease
1	17-25-F3	17	pre-treatment	2016-03-21	17	25	25F3	expt sheep	F3	Back left	back foot	left	foot	0	0	0	5.3825	0	0	0	0	0	0	0	0	4	0	0	no disease		1					0		0	0	0	0	20534	0	0	0	0.804991	0	0.253862	no disease
1	43-14-F2	43	post-treatment	2016-06-13	43	14	14F2	expt sheep	F2	Front right	front foot	right	foot	0	0	0	3.50574	7.45741	0	0	0	0	0	0	0	1	3	0	no disease		1		0			0		0	0	0	0	20618	0	0	0	0.653766	0.927237	0.562814	scald
1	9-27-F1	9	pre-treatment	2016-02-22	9	27	27F1	expt sheep	F1	Front left	front foot	left	foot	0	0	0	0	0	0	0	0	0	0	0	0	4	0	0	no disease		1	0				0		0	0	0	0	20506	0	0	0	0	0		no disease
1	9-25-F1	9	pre-treatment	2016-02-22	9	25	25F1	expt sheep	F1	Front left	front foot	left	foot	0	0	0	0	0	0	0	0	0	0	0	0	3	0	0	no disease		1	0				0		0	0	0	0	20506	0	0	0	0	0		no disease
0	1-26-F1	1	pre-treatment	2016-01-26	1	26	26F1	expt sheep	F1	Front left	front foot	left	foot	0	0	0	0	0	0	0	0	0	0	0	0	3	0	0	no disease		1	0				0		0	0	0	0	20479	0	0	0	0	0		codd
1	35-2-F2	35	pre-treatment	2016-05-23	35	2	2F2	expt sheep	F2	Front right	front foot	right	foot	65198.5	16836.9	83755.7	1953.95	206.203	1	1	1	1	1	1	1	2	3	fr&CODD	CODD	CODD & footrot	0		3			3	codd1-4	0	0	1	0	20597	4.81424	4.22629	4.92302	3.29114	2.3164	4.45695	codd
1	15-14-F1	15	pre-treatment	2016-03-14	15	14	14F1	expt sheep	F1	Front left	front foot	left	foot	0	0	0	0	0	0	0	0	0	0	0	0	3	0	0	no disease		0	0				0		0	0	0	0	20527	0	0	0	0	0		scald
1	43-2-F2	43	post-treatment	2016-06-13	43	2	2F2	expt sheep	F2	Front right	front foot	right	foot	0	250.103	0	0	0	1	0	1	0	0	0	0	3	2	CODD	CODD	CODD only	1		5			5	codd5	0	0	1	0	20618	0	2.39985	0	0	0		codd
1	47-11-F2	47	post-treatment	2016-06-27	47	11	11F2	expt sheep	F2	Front right	front foot	right	foot	0	0	0	0	0	0	0	0	0	0	0	0	2	0	0	no disease		1		0			0		0	0	0	0	20632	0	0	0	0	0		scald
1	35-11-F3	35	pre-treatment	2016-05-23	35	11	11F3	expt sheep	F3	Back left	back foot	left	foot	31.7356	8850.39	11.8763	0.509582	16.3232	1	0	1	0	0	1	1	2	0	0	no disease		0				0	0		0	0	0	0	20597	1.51502	3.94701	1.10979	0.178857	1.23863	0.980898	scald
1	15-27-F2	15	pre-treatment	2016-03-14	15	27	27F2	expt sheep	F2	Front right	front foot	right	foot	0	0	0	0	9.91237	0	0	0	0	0	0	0	4	0	0	no disease		0		0			0		0	0	0	0	20527	0	0	0	0	1.03792	0.519056	no disease
1	5-19-F3	5	pre-treatment	2016-02-08	5	19	19F3	expt sheep	F3	Back left	back foot	left	foot	0	0	0	0	0	0	0	0	0	0	0	0	2	0	0	no disease		1				0	0		0	0	0	0	20492	0	0	0	0	0		no disease
1	25-14-F2	25	pre-treatment	2016-04-18	25	14	14F2	expt sheep	F2	Front right	front foot	right	foot	0	0	0	0	6.53504	0	0	0	0	0	0	0	3	0	0	no disease		1		0			0		0	0	0	0	20562	0	0	0	0	0.877086	0.338127	scald
1	25-29-F2	25	pre-treatment	2016-04-18	25	29	29F2	expt sheep	F2	Front right	front foot	right	foot	38.4208	0	0	0	0	1	0	0	0	0	0	0	3	0	0	no disease		1		0			0		0	0	0	0	20562	1.59573	0	0	0	0		no disease
1	41-25-F1	41	pre-treatment	2016-06-06	41	25	25F1	expt sheep	F1	Front left	front foot	left	foot	55.817	0	0	0	0	1	1	0	0	0	0	0	3	0	0	no disease		0	0				0		0	0	0	0	20611	1.75448	0	0	0	0		no disease
1	9-9-F4	9	pre-treatment	2016-02-22		9	9F4	expt sheep	F4	Back right	back foot	right	foot	22.5126	0	0	0	0	1	0	0	0	0	0	0			0	no disease					0		0		0	0	0	0		1.3713	0	0	0	0		no disease
1	25-11-F3	25	pre-treatment	2016-04-18	25	11	11F3	expt sheep	F3	Back left	back foot	left	foot	57.7399	0	0	0	3.59801	1	1	0	0	0	0	0	3	0	0	no disease		1				0	0		0	0	0	0	20562	1.76893	0	0	0	0.66257	0.0789414	scald
1	5-23-F2	5	pre-treatment	2016-02-08	5	23	23F2	expt sheep	F2	Front right	front foot	right	foot	0	0	0	0	0	0	0	0	0	0	0	0	3	0	0	no disease		1		0			0		0	0	0	0	20492	0	0	0	0	0		no disease
1	11-6-F3	11	pre-treatment	2016-02-29	11	6	6F3	expt sheep	F3	Back left	back foot	left	foot	46.5656	0	0	0	0	1	1	0	0	0	0	0	4	0	0	no disease		0				0	0		0	0	0	0	20513	1.67729	0	0	0	0		no disease
0	1-24-F1	1	pre-treatment	2016-01-26	1	24	24F1	expt sheep	F1	Front left	front foot	left	foot	0	0	0	0	0	0	0	0	0	0	0	0	3	0	0	no disease		1	0				0		0	0	0	0	20479	0	0	0	0	0		no disease
1	38-1-F4	38	pre-treatment	2016-05-31	38	1	1F4	expt sheep	F4	Back right	back foot	right	foot	0	0	0	0	0	0	0	0	0	0	0	0	3	0	0	no disease		1			0		0		0	0	0	0	20605	0	0	0	0	0		no disease
1	3-37-F3	3	pre-treatment	2016-02-02	3	37	37F3	source sheep	F3	Back left	back foot	left	foot	83230.7	373.79	409369	7.81557	118716	1	1	1	1	0	1	1	2	3	CODD	CODD	CODD only	1				3	3	codd1-4	0	0	1	0	20486	4.92029	2.57379	5.61212	0.945251	5.07451	5.24559
1	5-1-F1	5	pre-treatment	2016-02-08	5	1	1F1	expt sheep	F1	Front left	front foot	left	foot	11.3397	0	0	0	0	0	0	0	0	0	0	0	3	0	0	no disease		1	0				0		0	0	0	0	20492	1.0913	0	0	0	0		no disease
1	17-28-F3	17	pre-treatment	2016-03-21	17	28	28F3	expt sheep	F3	Back left	back foot	left	foot	0	0	21.5844	0	13.3046	1	0	0	0	0	1	1	3	0	0	no disease		1				0	0		0	0	0	0	20534	0	0	1.35381	0	1.15548	1.06557	no disease
1	21-14-F3	21	pre-treatment	2016-04-04	21	14	14F3	expt sheep	F3	Back left	back foot	left	foot	0	0	0	0	0	0	0	0	0	0	0	0	3	0	0	no disease		1				0	0		0	0	0	0	20548	0	0	0	0	0		codd
1	11-13-F2	11	pre-treatment	2016-02-29	11	13	13F2	expt sheep	F2	Front right	front foot	right	foot	0	0	6.39802	3.75611	0	0	0	0	0	0	0	0	3	0	overgrown	other		0		0			0		0	0	0	1	20513	0	0	0.869115	0.677251	0	0.529521	no disease
1	5-13-F1	5	pre-treatment	2016-02-08	5	13	13F1	expt sheep	F1	Front left	front foot	left	foot	0	0	0	9.79542	0	0	0	0	0	0	0	0	2	0	0	no disease		1	0				0		0	0	0	0	20492	0	0	0	1.03324	0	0.513902	no disease
1	21-11-F1	21	pre-treatment	2016-04-04	21	11	11F1	expt sheep	F1	Front left	front foot	left	foot	0	0	0	1.53322	9.50774	0	0	0	0	0	0	0	3	0	0	no disease		1	0				0		0	0	0	0	20548	0	0	0	0.403673	1.02151	0.565885	scald
1	31-27-F2	31	pre-treatment	2016-05-09	31	27	27F2	expt sheep	F2	Front right	front foot	right	foot	0	0	0	0	0	0	0	0	0	0	0	0	3	0	0	no disease		0		0			0		0	0	0	0	20583	0	0	0	0	0		no disease
1	35-29-F3	35	pre-treatment	2016-05-23	35	29	29F3	expt sheep	F3	Back left	back foot	left	foot	0	0	0	0	0	0	0	0	0	0	0	0	3	0	0	no disease		0				0	0		0	0	0	0	20597	0	0	0	0	0		no disease
0	17-10-F4	17	pre-treatment	2016-03-21		10	10F4	expt sheep	F4	Back right	back foot	right	foot	0	0	0	0	0	0	0	0	0	0	0	0			0	no disease					0		0		0	0	0	0		0	0	0	0	0		codd
1	5-15-F2	5	pre-treatment	2016-02-08	5	15	15F2	expt sheep	F2	Front right	front foot	right	foot	14.8235	0	0	0	18.8351	0	0	0	0	0	1	1	3	0	0	no disease		1		0			0		0	0	0	0	20492	1.1993	0	0	0	1.29743	0.797847	codd
1	11-9-F3	11	pre-treatment	2016-02-29	11	9	9F3	expt sheep	F3	Back left	back foot	left	foot	0	0	0	0	0	0	0	0	0	0	0	0	4	0	0	no disease		0				0	0		0	0	0	0	20513	0	0	0	0	0		no disease
1	23-12-F3	23	pre-treatment	2016-04-11	23	12	12F3	expt sheep	F3	Back left	back foot	left	foot	3991.78	2573.97	224.8	39.4766	84.536	1	1	1	1	1	1	1	4	0	0	no disease		0				0	0		0	0	0	0	20555	3.60128	3.41077	2.35372	1.6072	1.93215	2.06547	codd
1	15-14-F2	15	pre-treatment	2016-03-14	15	14	14F2	expt sheep	F2	Front right	front foot	right	foot	0	0	0	0	8.00104	0	0	0	0	0	0	0	3	0	0	no disease		0		0			0		0	0	0	0	20527	0	0	0	0	0.954293	0.426025	scald
1	7-15-F1	7	pre-treatment	2016-02-15	7	15	15F1	expt sheep	F1	Front left	front foot	left	foot	0	0	0	0	0	0	0	0	0	0	0	0	4	0	0	no disease		0	0				0		0	0	0	0	20499	0	0	0	0	0		codd
1	9-10-F2	9	pre-treatment	2016-02-22	9	10	10F2	expt sheep	F2	Front right	front foot	right	foot	0	0	0	0	0	0	0	0	0	0	0	0	3	0	0	no disease		1					0		0	0	0	0	20506	0	0	0	0	0		footrot
1	5-17-F3	5	pre-treatment	2016-02-08	5	17	17F3	expt sheep	F3	Back left	back foot	left	foot	0	0	0	2.59488	0	0	0	0	0	0	0	0	3	0	0	no disease		1				0	0		0	0	0	0	20492	0	0	0	0.555684	0	-0.0630044	scald
1	17-20-F2	17	pre-treatment	2016-03-21	17	20	20F2	expt sheep	F2	Front right	front foot	right	foot	0	0	40.2451	0	6.4055	1	0	0	1	0	0	1	4	0	0	no disease		1		0			0		0	0	0	0	20534	0	0	1.61537	0	0.869554	1.19174	no disease
1	47-26-F1	47	post-treatment	2016-06-27	47	26	26F1	expt sheep	F1	Front left	front foot	left	foot	88914.6	6905.24	0	6.41174	18857.1	1	1	1	0	0	1	1	3	0	0	no disease		1	0				0		0	0	0	0	20632	4.94898	3.83924	0	0.86992	4.2755	3.7985	codd
1	1-17-F4	1	pre-treatment	2016-01-26	1	17	17F4	expt sheep	F4	Back right	back foot	right	foot	26.5948	0	0	0	0	1	0	0	0	0	0	0	3	0	0	no disease		1			0		0		0	0	0	0	20479	1.44083	0	0	0	0		scald
1	17-19-F2	17	pre-treatment	2016-03-21	17	19	19F2	expt sheep	F2	Front right	front foot	right	foot	0	0	0	0	0	0	0	0	0	0	0	0	3	0	0	no disease		1		0			0		0	0	0	0	20534	0	0	0	0	0		no disease
1	19-26-F3	19	pre-treatment	2016-03-28	19	26	26F3	expt sheep	F3	Back left	back foot	left	foot	7.03072	0	0	0	12.5059	0	0	0	0	0	1	1	4	0	0	no disease		0				0	0		0	0	0	0	20541	0.904755	0	0	0	1.13052	0.619994	no disease
0	3-35-F1	3	pre-treatment	2016-02-02	3	35	35F1	source sheep	F1	Front left	front foot	left	foot	0	0	0	1.01678	19.7497	0	0	0	0	0	1	1	2	3	0	no disease		1	0				0		0	0	0	0	20486	0	0	0	0.304659	1.31701	0.840241
1	13-11-F3	13	pre-treatment	2016-03-07	13	11	11F3	expt sheep	F3	Back left	back foot	left	foot	0	0	0	0	0	0	0	0	0	0	0	0	3	0	0	no disease		1				0	0		0	0	0	0	20520	0	0	0	0	0		scald
1	33-22-F4	33	pre-treatment	2016-05-16	33	22	22F4	expt sheep	F4	Back right	back foot	right	foot	0	0	0	0	0	0	0	0	0	0	0	0	3	0	0	no disease		1			0		0		0	0	0	0	20590	0	0	0	0	0		no disease
1	17-19-F1	17	pre-treatment	2016-03-21	17	19	19F1	expt sheep	F1	Front left	front foot	left	foot	0	0	0	0	0	0	0	0	0	0	0	0	3	0	0	no disease		1	0				0		0	0	0	0	20534	0	0	0	0	0		no disease
1	47-16-F1	47	post-treatment	2016-06-27	47	16	16F1	expt sheep	F1	Front left	front foot	left	foot	0	0	0	0	0	0	0	0	0	0	0	0	3	0	0	no disease		1	0				0		0	0	0	0	20632	0	0	0	0	0		no disease
1	21-8-F2	21	pre-treatment	2016-04-04	21	8	8F2	expt sheep	F2	Front right	front foot	right	foot	0	0	0	5.96852	0	0	0	0	0	0	0	0	3	0	0	no disease		1		0			0		0	0	0	0	20548	0	0	0	0.843141	0	0.298745	no disease
1	29-19-F1	29	pre-treatment	2016-05-03	29	19	19F1	expt sheep	F1	Front left	front foot	left	foot	0	0	44.4028	0	0	1	0	0	1	0	0	1	2	0	0	no disease		1	0				0		0	0	0	0	20577	0	0	1.65708	0	0	1.17029	no disease
1	15-20-F4	15	pre-treatment	2016-03-14	15	20	20F4	expt sheep	F4	Back right	back foot	right	foot	0	0	0	0	0	0	0	0	0	0	0	0	3	0	0	no disease		0			0		0		0	0	0	0	20527	0	0	0	0	0		no disease
1	47-20-F2	47	post-treatment	2016-06-27	47	20	20F2	expt sheep	F2	Front right	front foot	right	foot	8.91848	0	0	0	0	0	0	0	0	0	0	0	2	0	0	no disease		1		0			0		0	0	0	0	20632	0.996445	0	0	0	0		no disease
1	13-7-F3	13	pre-treatment	2016-03-07	13	7	7F3	expt sheep	F3	Back left	back foot	left	foot	0	0	0	0	0	0	0	0	0	0	0	0	3	0	0	no disease		1				0	0		0	0	0	0	20520	0	0	0	0	0		scald
1	21-23-F2	21	pre-treatment	2016-04-04	21	23	23F2	expt sheep	F2	Front right	front foot	right	foot	56.5702	0	0	0	0	1	1	0	0	0	0	0	2	3	0	no disease		1		0			0		0	0	0	0	20548	1.7602	0	0	0	0		no disease
1	38-5-F4	38	pre-treatment	2016-05-31	38	5	5F4	expt sheep	F4	Back right	back foot	right	foot	46636.9	1623.99	23217.6	7329.94	3315.58	1	1	1	1	1	1	1	2	3	CODD	CODD	CODD only	1			2		2	codd1-4	0	0	1	0	20605	4.66874	3.21085	4.36584	3.86516	3.52069	4.05261	codd
1	15-6-F2	15	pre-treatment	2016-03-14	15	6	6F2	expt sheep	F2	Front right	front foot	right	foot	0	0	0	0	0	0	0	0	0	0	0	0	3	0	0	no disease		0		0			0		0	0	0	0	20527	0	0	0	0	0		footrot
1	31-5-F3	31	pre-treatment	2016-05-09	31	5	5F3	expt sheep	F3	Back left	back foot	left	foot	0	0	0	0	0	0	0	0	0	0	0	0	3	3	0	no disease		0				0	0		0	0	0	0	20583	0	0	0	0	0		codd
1	35-10-F1	35	pre-treatment	2016-05-23	35	10	10F1	expt sheep	F1	Front left	front foot	left	foot	15.2749	0	0	0	0	0	0	0	0	0	0	0	3	2	0	no disease		0	0				0		0	0	0	0	20597	1.21152	0	0	0	0		no disease
1	38-30-F4	38	pre-treatment	2016-05-31	38	30	30F4	expt sheep	F4	Back right	back foot	right	foot	0	0	0	0	0	0	0	0	0	0	0	0	3	0	0	no disease		1			0		0		0	0	0	0	20605	0	0	0	0	0		scald
1	47-22-F2	47	post-treatment	2016-06-27	47	22	22F2	expt sheep	F2	Front right	front foot	right	foot	0	0	0	0	0	0	0	0	0	0	0	0	3	0	0	no disease		1		0			0		0	0	0	0	20632	0	0	0	0	0		no disease
1	29-22-F2	29	pre-treatment	2016-05-03	29	22	22F2	expt sheep	F2	Front right	front foot	right	foot	0	0	0	0	0	0	0	0	0	0	0	0	3	0	0	no disease		1		0			0		0	0	0	0	20577	0	0	0	0	0		no disease
1	5-6-F3	5	pre-treatment	2016-02-08	5	6	6F3	expt sheep	F3	Back left	back foot	left	foot	0	0	0	0	0	0	0	0	0	0	0	0	3	0	0	no disease		1				0	0		0	0	0	0	20492	0	0	0	0	0		no disease
1	19-8-F3	19	pre-treatment	2016-03-28	19	8	8F3	expt sheep	F3	Back left	back foot	left	foot	0	202.448	0	0	4.73487	1	0	1	0	0	0	0	3	0	overgrown	other		0				0	0		0	0	0	1	20541	0	2.30845	0	0	0.758524	0.198187	codd
1	23-12-F4	23	pre-treatment	2016-04-11	23	12	12F4	expt sheep	F4	Back right	back foot	right	foot	0	0	0	0	0	0	0	0	0	0	0	0	4	0	0	no disease		0			0		0		0	0	0	0	20555	0	0	0	0	0		no disease
1	43-20-F2	43	post-treatment	2016-06-13	43	20	20F2	expt sheep	F2	Front right	front foot	right	foot	0	0	0	0	0	0	0	0	0	0	0	0	3	0	0	no disease		1		0			0		0	0	0	0	20618	0	0	0	0	0		no disease
1	41-5-F3	41	pre-treatment	2016-06-06	41	5	5F3	expt sheep	F3	Back left	back foot	left	foot	227.466	0	4994.05	112.505	146.153	1	1	0	1	1	1	1	2	3	0	no disease		0				0	0		0	0	0	0	20611	2.35882	0	3.69854	2.05502	2.16777	3.24326	codd
1	13-19-F1	13	pre-treatment	2016-03-07	13	19	19F1	expt sheep	F1	Front left	front foot	left	foot	0	0	0	0	0	0	0	0	0	0	0	0	3	0	0	no disease		1	0				0		0	0	0	0	20520	0	0	0	0	0		no disease
0	1-10-F2	1	pre-treatment	2016-01-26	1	10	10F2	expt sheep	F2	Front right	front foot	right	foot	0	0	20.4316	0	13.6411	1	0	0	0	0	1	1	3	0	0	no disease		1		0			0		0	0	0	0	20479	0	0	1.33105	0	1.16557	1.05528	footrot
0	29-5-F4	29	pre-treatment	2016-05-03	29	5	5F4	expt sheep	F4	Back right	back foot	right	foot	0	1007.16	50.5657	0	0	1	0	1	1	0	0	1	3	3	scald	ID		1			0		0		1	0	0	0	20577	0	3.00353	1.71236	0	0	1.22674	codd
1	13-15-F3	13	pre-treatment	2016-03-07	13	15	15F3	expt sheep	F3	Back left	back foot	left	foot	10.9258	0	0	0	0	0	0	0	0	0	0	0	3	0	0	no disease		1				0	0		0	0	0	0	20520	1.07649	0	0	0	0		codd
1	5-4-F2	5	pre-treatment	2016-02-08	5	4	4F2	expt sheep	F2	Front right	front foot	right	foot	0	0	0	0	0	0	0	0	0	0	0	0	3	0	0	no disease		1		0			0		0	0	0	0	20492	0	0	0	0	0		scald
1	15-17-F4	15	pre-treatment	2016-03-14	15	17	17F4	expt sheep	F4	Back right	back foot	right	foot	0	0	0	0	0	0	0	0	0	0	0	0	3	0	0	no disease		0			0		0		0	0	0	0	20527	0	0	0	0	0		scald
1	15-12-F2	15	pre-treatment	2016-03-14	15	12	12F2	expt sheep	F2	Front right	front foot	right	foot	0	0	0	3.40782	0	0	0	0	0	0	0	0	3	0	0	no disease		0		0			0		0	0	0	0	20527	0	0	0	0.644224	0	0.0553554	codd
1	17-27-F4	17	pre-treatment	2016-03-21		27	27F4	expt sheep	F4	Back right	back foot	right	foot	50.0523	0	0	6.33417	5.71576	1	1	0	0	0	0	0			0	no disease					0		0		0	0	0	0		1.70802	0	0	0.865351	0.827095	0.603864	scald
1	35-2-F1	35	pre-treatment	2016-05-23	35	2	2F1	expt sheep	F1	Front left	front foot	left	foot	0	59631.1	0	0	0	1	0	1	0	0	0	0	2	3	scald	ID		0	0				0		1	0	0	0	20597	0	4.77548	0	0	0		footrot
1	29-22-F1	29	pre-treatment	2016-05-03	29	22	22F1	expt sheep	F1	Front left	front foot	left	foot	25.2674	0	0	0	0	1	0	0	0	0	0	0	3	0	0	no disease		1	0				0		0	0	0	0	20577	1.41942	0	0	0	0		scald
1	31-22-F4	31	pre-treatment	2016-05-09	31	22	22F4	expt sheep	F4	Back right	back foot	right	foot	0	0	0	0	0	0	0	0	0	0	0	0	3	0	0	no disease		0			0		0		0	0	0	0	20583	0	0	0	0	0		no disease
1	21-24-F1	21	pre-treatment	2016-04-04	21	24	24F1	expt sheep	F1	Front left	front foot	left	foot	39.802	0	0	0	0	1	0	0	0	0	0	0	4	0	0	no disease		1	0				0		0	0	0	0	20548	1.61068	0	0	0	0		no disease
1	7-9-F3	7	pre-treatment	2016-02-15	7	9	9F3	expt sheep	F3	Back left	back foot	left	foot	0	0	64.2607	11.3414	0	1	0	0	1	0	0	1	3	0	0	no disease		0					0		0	0	0	0	20499	0	0	1.81465	1.09136	0	1.40141	no disease
1	33-11-F2	33	pre-treatment	2016-05-16	33	11	11F2	expt sheep	F2	Front right	front foot	right	foot	35.3433	322.264	61.0155	0.45236	0	1	0	1	1	0	0	1	2	1	0	no disease		1		0			0		0	0	0	0	20590	1.56042	2.50956	1.7925	0.162074	0	1.31153	scald
1	5-19-F1	5	pre-treatment	2016-02-08	5	19	19F1	expt sheep	F1	Front left	front foot	left	foot	0	0	0	0	0	0	0	0	0	0	0	0	2	0	0	no disease		1	0				0		0	0	0	0	20492	0	0	0	0	0		no disease
1	33-43-F2	33	pre-treatment	2016-05-16	33	43	43F2	source sheep	F2	Front right	front foot	right	foot	0	0	0	0	0	0	0	0	0	0	0	0	3	3	CODD	CODD	CODD only	1		3			3	codd1-4	0	0	1	0	20590	0	0	0	0	0
1	33-17-F1	33	pre-treatment	2016-05-16	33	17	17F1	expt sheep	F1	Front left	front foot	left	foot	0	0	0	0	0	0	0	0	0	0	0	0	3	0	0	no disease		1	0				0		0	0	0	0	20590	0	0	0	0	0		no disease
1	29-1-F4	29	pre-treatment	2016-05-03	29	1	1F4	expt sheep	F4	Back right	back foot	right	foot	0	0	0	0	0	0	0	0	0	0	0	0	3	0	0	no disease		1			0		0		0	0	0	0	20577	0	0	0	0	0		no disease
1	47-9-F1	47	post-treatment	2016-06-27	47	9	9F1	expt sheep	F1	Front left	front foot	left	foot	0	0	0	0	0	0	0	0	0	0	0	0	2	0	CODD	CODD	CODD only	1	5				5	codd5	0	0	1	0	20632	0	0	0	0	0		codd
1	7-15-F2	7	pre-treatment	2016-02-15	7	15	15F2	expt sheep	F2	Front right	front foot	right	foot	0	0	0	0	0	0	0	0	0	0	0	0	4	0	0	no disease		0		0			0		0	0	0	0	20499	0	0	0	0	0		codd
1	9-1-F4	9	pre-treatment	2016-02-22		1	1F4	expt sheep	F4	Back right	back foot	right	foot	0	0	0	0	0	0	0	0	0	0	0	0			0	no disease					0		0		0	0	0	0		0	0	0	0	0		no disease
1	17-16-F3	17	pre-treatment	2016-03-21	17	16	16F3	expt sheep	F3	Back left	back foot	left	foot	19.048	0	0	0	0	0	0	0	0	0	0	0	3	0	0	no disease		1				0	0		0	0	0	0	20534	1.30207	0	0	0	0		no disease
0	15-9-F4	15	pre-treatment	2016-03-14	15	9	9F4	expt sheep	F4	Back right	back foot	right	foot	0	0	0	1.47481	0	0	0	0	0	0	0	0	3	0	0	no disease		0			0		0		0	0	0	0	20527	0	0	0	0.393542	0	-0.308385	no disease
1	41-1-F4	41	pre-treatment	2016-06-06	41	1	1F4	expt sheep	F4	Back right	back foot	right	foot	471.73	0	0	0	5.61827	1	1	0	0	0	0	0	3	0	0	no disease		0			0		0		0	0	0	0	20611	2.67461	0	0	0	0.820745	0.272482	no disease
1	19-3-F4	19	pre-treatment	2016-03-28	19	3	3F4	expt sheep	F4	Back right	back foot	right	foot	0	0	0	0	0	0	0	0	0	0	0	0	4	0	0	no disease		0			0		0		0	0	0	0	20541	0	0	0	0	0		no disease
1	19-11-F1	19	pre-treatment	2016-03-28	19	11	11F1	expt sheep	F1	Front left	front foot	left	foot	0	0	0	0	0	0	0	0	0	0	0	0	3	0	0	no disease		0	0				0		0	0	0	0	20541	0	0	0	0	0		scald
1	7-8-F2	7	pre-treatment	2016-02-15	7	8	8F2	expt sheep	F2	Front right	front foot	right	foot	3.44529	0	0	0	0	0	0	0	0	0	0	0	4	0	0	no disease		0		0			0		0	0	0	0	20499	0.6479	0	0	0	0		no disease
1	38-4-F3	38	pre-treatment	2016-05-31	38	4	4F3	expt sheep	F3	Back left	back foot	left	foot	0	0	30.5323	7.99694	0	1	0	0	0	0	0	0	2	3	0	no disease		1				0	0		0	0	0	0	20605	0	0	1.49875	0.954095	0	1.10867	no disease
1	7-8-F1	7	pre-treatment	2016-02-15	7	8	8F1	expt sheep	F1	Front left	front foot	left	foot	0	0	0	0	32.9862	1	0	0	0	0	1	1	4	0	0	no disease		0	0				0		0	0	0	0	20499	0	0	0	0	1.5313	1.04121	no disease
1	19-3-F3	19	pre-treatment	2016-03-28	19	3	3F3	expt sheep	F3	Back left	back foot	left	foot	0	0	0	0	0	0	0	0	0	0	0	0	4	0	0	no disease		0				0	0		0	0	0	0	20541	0	0	0	0	0		no disease
1	17-20-F4	17	pre-treatment	2016-03-21		20	20F4	expt sheep	F4	Back right	back foot	right	foot	10.7143	0	0	0	4.7841	0	0	0	0	0	0	0			0	no disease					0		0		0	0	0	0		1.06871	0	0	0	0.762236	0.202679	no disease
1	41-7-F1	41	pre-treatment	2016-06-06	41	7	7F1	expt sheep	F1	Front left	front foot	left	foot	66.7275	32669.1	95.5713	0	0	1	1	1	1	0	0	1	2	3	0	no disease		0	0				0		0	0	0	0	20611	1.83077	4.51415	1.98485	0	0	1.50321	codd
1	43-23-F1	43	post-treatment	2016-06-13	43	23	23F1	expt sheep	F1	Front left	front foot	left	foot	0	0	0	0	0	0	0	0	0	0	0	0	2	3	0	no disease		1	0				0		0	0	0	0	20618	0	0	0	0	0		no disease
0	1-3-F2	1	pre-treatment	2016-01-26	1	3	3F2	expt sheep	F2	Front right	front foot	right	foot	0	0	0	0	8.4321	0	0	0	0	0	0	0	3	0	0	no disease		1		0			0		0	0	0	0	20479	0	0	0	0	0.974608	0.448815	codd
1	51-17-F1	51	post-treatment	2016-07-11	51	17	17F1	expt sheep	F1	Front left	front foot	left	foot	0	0	0	0	0	0	0	0	0	0	0	0	2	3	0	no disease		0	0				0		0	0	0	0	20646	0	0	0	0	0		no disease
1	27-23-F2	27	pre-treatment	2016-04-25	27	23	23F2	expt sheep	F2	Front right	front foot	right	foot	0	0	0	0	0	0	0	0	0	0	0	0	2	3	0	no disease		0		0			0		0	0	0	0	20569	0	0	0	0	0		no disease
1	19-23-F4	19	pre-treatment	2016-03-28	19	23	23F4	expt sheep	F4	Back right	back foot	right	foot	8.57734	0	0	0	3.85426	0	0	0	0	0	0	0	4	0	0	no disease		0			0		0		0	0	0	0	20541	0.981245	0	0	0	0.686123	0.108819	codd
1	47-24-F1	47	post-treatment	2016-06-27	47	24	24F1	expt sheep	F1	Front left	front foot	left	foot	0	0	0	0	0	0	0	0	0	0	0	0	3	0	0	no disease		1	0				0		0	0	0	0	20632	0	0	0	0	0		no disease
1	33-20-F2	33	pre-treatment	2016-05-16	33	20	20F2	expt sheep	F2	Front right	front foot	right	foot	0	0	0	0	0	0	0	0	0	0	0	0	3	0	0	no disease		1		0			0		0	0	0	0	20590	0	0	0	0	0		no disease
1	27-25-F1	27	pre-treatment	2016-04-25	27	25	25F1	expt sheep	F1	Front left	front foot	left	foot	0	0	0	0	0	0	0	0	0	0	0	0	3	0	0	no disease		0	0				0		0	0	0	0	20569	0	0	0	0	0		no disease
1	38-11-F4	38	pre-treatment	2016-05-31	38	11	11F4	expt sheep	F4	Back right	back foot	right	foot	0	0	0	16.1717	0	0	0	0	0	0	0	0	3	0	0	no disease		1			0		0		0	0	0	0	20605	0	0	0	1.23481	0	0.731634	no disease
0	17-11-F1	17	pre-treatment	2016-03-21	17	11	11F1	expt sheep	F1	Front left	front foot	left	foot	0	0	0	0	0	0	0	0	0	0	0	0	3	0	0	no disease		1	0				0		0	0	0	0	20534	0	0	0	0	0		scald
1	5-9-F1	5	pre-treatment	2016-02-08	5	9	9F1	expt sheep	F1	Front left	front foot	left	foot	5.85761	0	0	0	4.51782	0	0	0	0	0	0	0	3	0	0	no disease		1	0				0		0	0	0	0	20492	0.836173	0	0	0	0.741768	0.177808	codd
1	5-21-F2	5	pre-treatment	2016-02-08	5	21	21F2	expt sheep	F2	Front right	front foot	right	foot	0	0	0	0	0	0	0	0	0	0	0	0	3	0	0	no disease		1		0			0		0	0	0	0	20492	0	0	0	0	0		no disease
1	43-14-F4	43	post-treatment	2016-06-13	43	14	14F4	expt sheep	F4	Back right	back foot	right	foot	429.718	1413.57	1486.59	157.948	22.7585	1	1	1	1	1	1	1	1	3	0	no disease		1			0		0		0	0	0	0	20618	2.63419	3.15063	3.17248	2.20126	1.37582	2.74489	codd
1	9-19-F4	9	pre-treatment	2016-02-22		19	19F4	expt sheep	F4	Back right	back foot	right	foot	0	0	0	14.9358	0	0	0	0	0	0	0	0			0	no disease					0		0		0	0	0	0		0	0	0	1.20237	0	0.697108	no disease
1	47-1-F4	47	post-treatment	2016-06-27	47	1	1F4	expt sheep	F4	Back right	back foot	right	foot	0	0	0	0	0	0	0	0	0	0	0	0	2	0	0	no disease		1			0		0		0	0	0	0	20632	0	0	0	0	0		no disease
1	47-7-F3	47	post-treatment	2016-06-27	47	7	7F3	expt sheep	F3	Back left	back foot	left	foot	0	0	0	0	0	0	0	0	0	0	0	0	2	0	0	no disease		1				0	0		0	0	0	0	20632	0	0	0	0	0		scald
1	25-18-F4	25	pre-treatment	2016-04-18	25	18	18F4	expt sheep	F4	Back right	back foot	right	foot	0	0	0	0	0	0	0	0	0	0	0	0	3	0	0	no disease		1			0		0		0	0	0	0	20562	0	0	0	0	0		no disease
1	27-22-F4	27	pre-treatment	2016-04-25	27	22	22F4	expt sheep	F4	Back right	back foot	right	foot	0	0	0	0	0	0	0	0	0	0	0	0	4	0	0	no disease		0			0		0		0	0	0	0	20569	0	0	0	0	0		no disease
0	35-23-F1	35	pre-treatment	2016-05-23	35	23	23F1	expt sheep	F1	Front left	front foot	left	foot	0	0	0	0	0	0	0	0	0	0	0	0	2	3	0	no disease		0	0				0		0	0	0	0	20597	0	0	0	0	0		no disease
1	41-2-F2	41	pre-treatment	2016-06-06	41	2	2F2	expt sheep	F2	Front right	front foot	right	foot	250.897	5215.95	1321.42	3.19638	28.9018	1	1	1	1	0	1	1	3	2	CODD	CODD	CODD only	0		4			4	codd1-4	0	0	1	0	20611	2.40122	3.71742	3.12137	0.622875	1.4757	2.65434	codd
1	25-22-F3	25	pre-treatment	2016-04-18	25	22	22F3	expt sheep	F3	Back left	back foot	left	foot	0	0	0	0	0	0	0	0	0	0	0	0	4	0	0	no disease		1				0	0		0	0	0	0	20562	0	0	0	0	0		scald
1	51-7-F4	51	post-treatment	2016-07-11	51	7	7F4	expt sheep	F4	Back right	back foot	right	foot	432.282	5686.45	0	0	0	1	1	1	0	0	0	0	2	0	scald	ID		0			0		0		1	0	0	0	20646	2.63677	3.75492	0	0	0		scald
1	5-22-F4	5	pre-treatment	2016-02-08	5	22	22F4	expt sheep	F4	Back right	back foot	right	foot	0	0	0	0	0	0	0	0	0	0	0	0	3	0	0	no disease		1			0		0		0	0	0	0	20492	0	0	0	0	0		no disease
1	17-15-F4	17	pre-treatment	2016-03-21		15	15F4	expt sheep	F4	Back right	back foot	right	foot	0	0	0	1.48952	5.31021	0	0	0	0	0	0	0			0	no disease					0		0		0	0	0	0		0	0	0	0.396115	0.800044	0.35537	footrot
1	47-24-F3	47	post-treatment	2016-06-27	47	24	24F3	expt sheep	F3	Back left	back foot	left	foot	0	0	0	0	0	0	0	0	0	0	0	0	3	0	0	no disease		1				0	0		0	0	0	0	20632	0	0	0	0	0		no disease
1	33-28-F3	33	pre-treatment	2016-05-16		28	28F3	expt sheep	F3	Back left	back foot	left	foot	0	0	0	0	0	0	0	0	0	0	0	0			0	no disease						0	0		0	0	0	0		0	0	0	0	0		no disease
1	7-5-F2	7	pre-treatment	2016-02-15	7	5	5F2	expt sheep	F2	Front right	front foot	right	foot	0	0	0	6.1798	23.4184	1	0	0	0	0	1	1	4	0	0	no disease		0		0			0		0	0	0	0	20499	0	0	0	0.856112	1.38772	0.994144	codd
1	33-45-F1	33	pre-treatment	2016-05-16	33	45	45F1	source sheep	F1	Front left	front foot	left	foot	0	0	0	14.8927	7.06462	0	0	0	0	0	0	0	2	3	0	no disease		1	0				0		0	0	0	0	20590	0	0	0	1.2012	0.906584	0.864458
1	11-26-F3	11	pre-treatment	2016-02-29	11	26	26F3	expt sheep	F3	Back left	back foot	left	foot	13.0595	0	0	0	0	0	0	0	0	0	0	0	4	0	0	no disease		0				0	0		0	0	0	0	20513	1.14797	0	0	0	0		no disease
1	13-6-F2	13	pre-treatment	2016-03-07	13	6	6F2	expt sheep	F2	Front right	front foot	right	foot	46.7664	1241.23	0	0	0	1	1	1	0	0	0	0	3	0	0	no disease		1		0			0		0	0	0	0	20520	1.67912	3.0942	0	0	0		footrot
1	19-28-F3	19	pre-treatment	2016-03-28	19	28	28F3	expt sheep	F3	Back left	back foot	left	foot	0	0	0	0	0	0	0	0	0	0	0	0	4	0	0	no disease		0				0	0		0	0	0	0	20541	0	0	0	0	0		no disease
1	51-21-F3	51	post-treatment	2016-07-11	51	21	21F3	expt sheep	F3	Back left	back foot	left	foot	0	0	0	0	0	0	0	0	0	0	0	0	3	0	0	no disease		0				0	0		0	0	0	0	20646	0	0	0	0	0		no disease
1	51-5-F1	51	post-treatment	2016-07-11		5	5F1	expt sheep	F1	Front left	front foot	left	foot	0	0	0	0	0	0	0	0	0	0	0	0			CODD	CODD	CODD only		5				5	codd5	0	0	1	0		0	0	0	0	0		codd
0	1-14-F4	1	pre-treatment	2016-01-26	1	14	14F4	expt sheep	F4	Back right	back foot	right	foot	0	0	0	0	10.6967	0	0	0	0	0	1	1	2	0	0	no disease		1			0		0		0	0	0	0	20479	0	0	0	0	1.06806	0.552127	codd
0	7-4-F3	7	pre-treatment	2016-02-15	7	4	4F3	expt sheep	F3	Back left	back foot	left	foot	0	0	0	5.88332	0	0	0	0	0	0	0	0	4	0	0	no disease		0			0		0		0	0	0	0	20499	0	0	0	0.837798	0	0.292501	no disease
1	29-10-F4	29	pre-treatment	2016-05-03	29	10	10F4	expt sheep	F4	Back right	back foot	right	foot	0	139.378	0	0	0	1	0	1	0	0	0	0	3	0	0	no disease		1			0		0		0	0	0	0	20577	0	2.1473	0	0	0		codd
1	51-13-F1	51	post-treatment	2016-07-11	51	13	13F1	expt sheep	F1	Front left	front foot	left	foot	6.14475	0	0	0	0	0	0	0	0	0	0	0	2	0	0	no disease		0	0				0		0	0	0	0	20646	0.853987	0	0	0	0		no disease
1	27-24-F3	27	pre-treatment	2016-04-25	27	24	24F3	expt sheep	F3	Back left	back foot	left	foot	15.8213	0	40.0616	0	7.77219	1	0	0	1	0	0	1	4	0	0	no disease		0				0	0		0	0	0	0	20569	1.22586	0	1.61344	0	0.943108	1.20261	no disease
0	1-21-F3	1	pre-treatment	2016-01-26	1	21	21F3	expt sheep	F3	Back left	back foot	left	foot	0	62.5855	0	0	0	1	0	0	0	0	0	0	3	0	0	no disease		1				0	0		0	0	0	0	20479	0	1.80336	0	0	0		no disease
1	47-30-F3	47	post-treatment	2016-06-27	47	30	30F3	expt sheep	F3	Back left	back foot	left	foot	0	0	0	0	0	0	0	0	0	0	0	0	3	1	0	no disease		1				0	0		0	0	0	0	20632	0	0	0	0	0		scald
1	47-13-F4	47	post-treatment	2016-06-27	47	13	13F4	expt sheep	F4	Back right	back foot	right	foot	0	0	0	0	0	0	0	0	0	0	0	0	3	0	0	no disease		1			0		0		0	0	0	0	20632	0	0	0	0	0		no disease
1	17-9-F2	17	pre-treatment	2016-03-21	17	9	9F2	expt sheep	F2	Front right	front foot	right	foot	27.991	0	0	0	0	1	0	0	0	0	0	0	3	0	0	no disease		1		0			0		0	0	0	0	20534	1.46226	0	0	0	0		codd
1	11-13-F1	11	pre-treatment	2016-02-29	11	13	13F1	expt sheep	F1	Front left	front foot	left	foot	0	0	0	3.56222	0	0	0	0	0	0	0	0	3	0	0	no disease		0	0				0		0	0	0	0	20513	0	0	0	0.659176	0	0.0745994	no disease
1	17-18-F3	17	pre-treatment	2016-03-21	17	18	18F3	expt sheep	F3	Back left	back foot	left	foot	0	0	0	0	0	0	0	0	0	0	0	0	3	0	0	no disease		1					0		0	0	0	0	20534	0	0	0	0	0		no disease
1	7-6-F4	7	pre-treatment	2016-02-15		6	6F4	expt sheep	F4	Back right	back foot	right	foot	3.03185	0	0	0	22.6414	1	0	0	0	0	1	1			0	no disease					0		0		0	0	0	0		0.605504	0	0	0	1.37367	0.877783	no disease
1	21-17-F1	21	pre-treatment	2016-04-04	21	17	17F1	expt sheep	F1	Front left	front foot	left	foot	0	0	0	0	0	0	0	0	0	0	0	0	4	0	0	no disease		1	0				0		0	0	0	0	20548	0	0	0	0	0		no disease
1	35-28-F3	35	pre-treatment	2016-05-23	35	28	28F3	expt sheep	F3	Back left	back foot	left	foot	0	174.144	0	0	0	1	0	1	0	0	0	0	3	0	0	no disease		0				0	0		0	0	0	0	20597	0	2.2434	0	0	0		no disease
1	5-17-F4	5	pre-treatment	2016-02-08	5	17	17F4	expt sheep	F4	Back right	back foot	right	foot	0	0	0	2.05492	0	0	0	0	0	0	0	0	3	0	0	no disease		1			0		0		0	0	0	0	20492	0	0	0	0.485001	0	-0.164325	scald
1	33-14-F2	33	pre-treatment	2016-05-16	33	14	14F2	expt sheep	F2	Front right	front foot	right	foot	0	0	0	5.37987	4.59366	0	0	0	0	0	0	0	2	3	0	no disease		1		0			0		0	0	0	0	20590	0	0	0	0.804812	0.747696	0.521728	scald
1	38-15-F2	38	pre-treatment	2016-05-31	38	15	15F2	expt sheep	F2	Front right	front foot	right	foot	739.341	193670	4302.26	3584.29	3097.59	1	1	1	1	1	1	1	2	3	footrot	FR		1		0			0		0	1	0	0	20605	2.86943	5.28707	3.6338	3.55452	3.49116	3.56364	codd
1	47-30-F1	47	post-treatment	2016-06-27	47	30	30F1	expt sheep	F1	Front left	front foot	left	foot	39857	0	0	14338.3	3695.39	1	1	0	0	1	1	1	3	1	scald	ID		1	0				0		1	0	0	0	20632	4.60052	0	0	4.15653	3.56778	3.77896	footrot
1	41-3-F4	41	pre-treatment	2016-06-06	41	3	3F4	expt sheep	F4	Back right	back foot	right	foot	584.445	115.543	326.395	30.2152	34.1998	1	1	1	1	1	1	1	2	3	0	no disease		0			0		0		0	0	0	0	20611	2.76749	2.06649	2.51507	1.49437	1.54654	2.11484	no disease
1	19-24-F1	19	pre-treatment	2016-03-28	19	24	24F1	expt sheep	F1	Front left	front foot	left	foot	0	0	0	0	0	0	0	0	0	0	0	0	4	0	0	no disease		0	0				0		0	0	0	0	20541	0	0	0	0	0		no disease
1	15-13-F4	15	pre-treatment	2016-03-14	15	13	13F4	expt sheep	F4	Back right	back foot	right	foot	0	0	0	0	0	0	0	0	0	0	0	0	2	0	0	no disease		0			0		0		0	0	0	0	20527	0	0	0	0	0		no disease
0	31-26-F4	31	pre-treatment	2016-05-09	31	26	26F4	expt sheep	F4	Back right	back foot	right	foot	53.8165	0	0	0	0	1	1	0	0	0	0	0	3	0	0	no disease		0			0		0		0	0	0	0	20583	1.73891	0	0	0	0		no disease
1	5-28-F1	5	pre-treatment	2016-02-08	5	28	28F1	expt sheep	F1	Front left	front foot	left	foot	0	0	0	0	0	0	0	0	0	0	0	0	3	0	0	no disease		1	0				0		0	0	0	0	20492	0	0	0	0	0		no disease
1	13-21-F1	13	pre-treatment	2016-03-07	13	21	21F1	expt sheep	F1	Front left	front foot	left	foot	0	0	0	0	0	0	0	0	0	0	0	0	3	0	0	no disease		1	0				0		0	0	0	0	20520	0	0	0	0	0		no disease
1	51-16-F4	51	post-treatment	2016-07-11	51	16	16F4	expt sheep	F4	Back right	back foot	right	foot	7.10686	0	0	0	0	0	0	0	0	0	0	0	3	0	0	no disease		0			0		0		0	0	0	0	20646	0.908853	0	0	0	0		no disease
1	5-5-F3	5	pre-treatment	2016-02-08	5	5	5F3	expt sheep	F3	Back left	back foot	left	foot	0	0	0	0	32.0732	1	0	0	0	0	1	1	3	0	0	no disease		1				0	0		0	0	0	0	20492	0	0	0	0	1.51948	1.02902	codd
0	1-11-F3	1	pre-treatment	2016-01-26	1	11	11F3	expt sheep	F3	Back left	back foot	left	foot	0	0	0	0	21.7011	1	0	0	0	0	1	1	2	0	0	no disease		1				0	0		0	0	0	0	20479	0	0	0	0	1.35605	0.85936	scald
1	43-13-F2	43	post-treatment	2016-06-13	43	13	13F2	expt sheep	F2	Front right	front foot	right	foot	0	0	0	0	0	0	0	0	0	0	0	0	2	0	0	no disease		1		0			0		0	0	0	0	20618	0	0	0	0	0		no disease
1	11-10-F2	11	pre-treatment	2016-02-29	11	10	10F2	expt sheep	F2	Front right	front foot	right	foot	35.0392	151.274	15.2605	21.6233	6.27221	1	0	1	0	0	0	0	3	0	overgrown	other		0		0			0		0	0	0	1	20513	1.55677	2.18263	1.21113	1.35456	0.861667	1.15792	footrot
1	17-2-F1	17	pre-treatment	2016-03-21	17	2	2F1	expt sheep	F1	Front left	front foot	left	foot	0	0	0	0	8.92225	0	0	0	0	0	0	0	4	0	0	no disease		1	0				0		0	0	0	0	20534	0	0	0	0	0.99661	0.473353	footrot
1	19-23-F3	19	pre-treatment	2016-03-28	19	23	23F3	expt sheep	F3	Back left	back foot	left	foot	0	0	0	0	0	0	0	0	0	0	0	0	4	0	0	no disease		0				0	0		0	0	0	0	20541	0	0	0	0	0		codd
1	38-21-F4	38	pre-treatment	2016-05-31	38	21	21F4	expt sheep	F4	Back right	back foot	right	foot	42.0234	0	13.1653	7.3076	12.1989	1	0	0	0	0	1	1	3	0	0	no disease		1			0		0		0	0	0	0	20605	1.63371	0	1.15122	0.919476	1.12054	1.03705	no disease
1	47-17-F4	47	post-treatment	2016-06-27	47	17	17F4	expt sheep	F4	Back right	back foot	right	foot	181.919	0	0	0	0	1	1	0	0	0	0	0	2	2	0	no disease		1			0		0		0	0	0	0	20632	2.26226	0	0	0	0		scald
0	3-35-F2	3	pre-treatment	2016-02-02	3	35	35F2	source sheep	F2	Front right	front foot	right	foot	0	0	74.5976	4.49378	11.5079	1	0	0	1	0	1	1	2	3	0	no disease		1		0			0		0	0	0	0	20486	0	0	1.87851	0.739872	1.09718	1.48
1	25-25-F2	25	pre-treatment	2016-04-18	25	25	25F2	expt sheep	F2	Front right	front foot	right	foot	51.164	0	243.083	39.2071	26.1911	1	1	0	1	1	1	1	3	0	0	no disease		1		0			0		0	0	0	0	20562	1.71737	0	2.38754	1.6043	1.43443	2.01211	no disease
0	15-28-F1	15	pre-treatment	2016-03-14	15	28	28F1	expt sheep	F1	Front left	front foot	left	foot	0	0	0	0	22.8467	1	0	0	0	0	1	1	3	0	0	no disease		0	0				0		0	0	0	0	20527	0	0	0	0	1.37743	0.881703	no disease
1	19-4-F4	19	pre-treatment	2016-03-28	19	4	4F4	expt sheep	F4	Back right	back foot	right	foot	70.4261	0	49.8665	3.80384	6.46438	1	1	0	1	0	0	1	4	0	0	no disease		0			0		0		0	0	0	0	20541	1.85386	0	1.70643	0.681589	0.872994	1.302	no disease
1	13-17-F2	13	pre-treatment	2016-03-07	13	17	17F2	expt sheep	F2	Front right	front foot	right	foot	0	0	0	0	0	0	0	0	0	0	0	0	3	0	0	no disease		1		0			0		0	0	0	0	20520	0	0	0	0	0		codd
1	41-28-F4	41	pre-treatment	2016-06-06	41	28	28F4	expt sheep	F4	Back right	back foot	right	foot	125.321	0	137.779	113.172	0	1	1	0	1	1	0	1	3	2	0	no disease		0			0		0		0	0	0	0	20611	2.10147	0	2.14232	2.05756	0	1.92247	scald
0	3-34-F3	3	pre-treatment	2016-02-02	3	34	34F3	source sheep	F3	Back left	back foot	left	foot	0	0	0	1.9539	12.3792	0	0	0	0	0	1	1	2	3	0	no disease		1				0	0		0	0	0	0	20486	0	0	0	0.470396	1.12643	0.67922
1	17-5-F3	17	pre-treatment	2016-03-21	17	5	5F3	expt sheep	F3	Back left	back foot	left	foot	0	0	0	0	0	0	0	0	0	0	0	0	3	0	0	no disease		1				0	0		0	0	0	0	20534	0	0	0	0	0		codd
1	33-25-F4	33	pre-treatment	2016-05-16	33	25	25F4	expt sheep	F4	Back right	back foot	right	foot	0	0	0	0	0	0	0	0	0	0	0	0	3	0	0	no disease		1			0		0		0	0	0	0	20590	0	0	0	0	0		no disease
1	25-26-F3	25	pre-treatment	2016-04-18	25	26	26F3	expt sheep	F3	Back left	back foot	left	foot	0	0	0	0	0	0	0	0	0	0	0	0	3	0	0	no disease		1				0	0		0	0	0	0	20562	0	0	0	0	0		no disease
1	31-25-F2	31	pre-treatment	2016-05-09	31	25	25F2	expt sheep	F2	Front right	front foot	right	foot	0	0	0	0	0	0	0	0	0	0	0	0	2	0	0	no disease		0		0			0		0	0	0	0	20583	0	0	0	0	0		no disease
1	15-15-F3	15	pre-treatment	2016-03-14	15	15	15F3	expt sheep	F3	Back left	back foot	left	foot	0	0	0	0	0	0	0	0	0	0	0	0	2	2	0	no disease		0				0	0		0	0	0	0	20527	0	0	0	0	0		codd
1	21-9-F1	21	pre-treatment	2016-04-04	21	9	9F1	expt sheep	F1	Front left	front foot	left	foot	0	0	0	0	0	0	0	0	0	0	0	0	3	0	0	no disease		1	0				0		0	0	0	0	20548	0	0	0	0	0		codd
1	11-10-F3	11	pre-treatment	2016-02-29	11	10	10F3	expt sheep	F3	Back left	back foot	left	foot	15.0642	446.517	0	3.26199	9.45168	1	0	1	0	0	0	0	3	0	0	no disease		0				0	0		0	0	0	0	20513	1.20586	2.65081	0	0.629612	1.01919	0.62715	no disease
1	13-12-F4	13	pre-treatment	2016-03-07	13	12	12F4	expt sheep	F4	Back right	back foot	right	foot	0	0	0	0	0	0	0	0	0	0	0	0	3	0	0	no disease		1			0		0		0	0	0	0	20520	0	0	0	0	0		no disease
0	3-33-F4	3	pre-treatment	2016-02-02	3	33	33F4	source sheep	F4	Back right	back foot	right	foot	0	0	0	0	42.4365	1	0	0	0	0	1	1	2	3	0	no disease		1			0		0		0	0	0	0	20486	0	0	0	0	1.63785	1.15062
1	38-15-F4	38	pre-treatment	2016-05-31	38	15	15F4	expt sheep	F4	Back right	back foot	right	foot	0	460.319	41.5894	9.22962	68.0172	1	0	1	1	0	1	1	2	3	scald	ID		1			0		0		1	0	0	0	20605	0	2.664	1.6293	1.00986	1.83896	1.59783	footrot
1	1-7-F3	1	pre-treatment	2016-01-26	1	7	7F3	expt sheep	F3	Back left	back foot	left	foot	15.9281	0	0	0	4.33528	0	0	0	0	0	0	0	3	0	0	no disease		1				0	0		0	0	0	0	20479	1.22861	0	0	0	0.727158	0.159896	scald
1	31-8-F3	31	pre-treatment	2016-05-09	31	8	8F3	expt sheep	F3	Back left	back foot	left	foot	54236.9	28135.4	38116.6	2131.87	8541.87	1	1	1	1	1	1	1	2	3	fr&CODD	CODD	CODD & footrot	0				1	1	codd1-4	0	0	1	0	20583	4.7343	4.44927	4.58113	3.32896	3.9316	4.21121	codd
1	13-19-F2	13	pre-treatment	2016-03-07	13	19	19F2	expt sheep	F2	Front right	front foot	right	foot	0	0	0	0	4.43222	0	0	0	0	0	0	0	3	0	0	no disease		1		0			0		0	0	0	0	20520	0	0	0	0	0.734977	0.1695	no disease
1	17-8-F2	17	pre-treatment	2016-03-21	17	8	8F2	expt sheep	F2	Front right	front foot	right	foot	35.1685	0	20.5933	0	13.8007	1	0	0	0	0	1	1	3	0	0	no disease		1		0			0		0	0	0	0	20534	1.55833	0	1.33432	0	1.17028	1.05936	no disease
1	27-10-F3	27	pre-treatment	2016-04-25	27	10	10F3	expt sheep	F3	Back left	back foot	left	foot	37.0857	0	109.308	4.63279	66.9226	1	0	0	1	0	1	1	3	0	0	no disease		0				0	0		0	0	0	0	20569	1.58076	0	2.04261	0.750723	1.83201	1.78023	no disease
1	25-20-F2	25	pre-treatment	2016-04-18	25	20	20F2	expt sheep	F2	Front right	front foot	right	foot	0	0	0	0	4.54884	0	0	0	0	0	0	0	3	0	0	no disease		1		0			0		0	0	0	0	20562	0	0	0	0	0.744202	0.18078	no disease
1	7-11-F1	7	pre-treatment	2016-02-15	7	11	11F1	expt sheep	F1	Front left	front foot	left	foot	0	0	0	0	0	0	0	0	0	0	0	0	4	0	0	no disease		0	0				0		0	0	0	0	20499	0	0	0	0	0		scald
1	29-24-F1	29	pre-treatment	2016-05-03	29	24	24F1	expt sheep	F1	Front left	front foot	left	foot	0	0	0	0	0	0	0	0	0	0	0	0	3	0	0	no disease		1	0				0		0	0	0	0	20577	0	0	0	0	0		no disease
1	5-23-F3	5	pre-treatment	2016-02-08	5	23	23F3	expt sheep	F3	Back left	back foot	left	foot	0	0	0	0	0	0	0	0	0	0	0	0	3	0	0	no disease		1				0	0		0	0	0	0	20492	0	0	0	0	0		codd
1	21-17-F4	21	pre-treatment	2016-04-04	21	17	17F4	expt sheep	F4	Back right	back foot	right	foot	0	0	0	0	0	0	0	0	0	0	0	0	4	0	0	no disease		1			0		0		0	0	0	0	20548	0	0	0	0	0		scald
0	11-11-F2	11	pre-treatment	2016-02-29	11	11	11F2	expt sheep	F2	Front right	front foot	right	foot	0	0	0	0	0	0	0	0	0	0	0	0	3	0	0	no disease		0		0			0		0	0	0	0	20513	0	0	0	0	0		scald
1	41-5-F4	41	pre-treatment	2016-06-06	41	5	5F4	expt sheep	F4	Back right	back foot	right	foot	16754.8	4113.15	18041	497.709	7209.18	1	1	1	1	1	1	1	2	3	fr&CODD	CODD	CODD & footrot	0			3		3	codd1-4	0	0	1	0	20611	4.22417	3.61428	4.25629	2.69785	3.85795	3.93362	codd
1	41-22-F2	41	pre-treatment	2016-06-06	41	22	22F2	expt sheep	F2	Front right	front foot	right	foot	0	0	0	0	0	0	0	0	0	0	0	0	3	0	0	no disease		0		0			0		0	0	0	0	20611	0	0	0	0	0		no disease
1	35-27-F3	35	pre-treatment	2016-05-23	35	27	27F3	expt sheep	F3	Back left	back foot	left	foot	0	0	0	37.1876	6.7238	1	0	0	0	1	0	1	3	0	0	no disease		0				0	0		0	0	0	0	20597	0	0	0	1.58192	0.887831	1.16546	no disease
1	51-9-F4	51	post-treatment	2016-07-11	51	9	9F4	expt sheep	F4	Back right	back foot	right	foot	5.11181	0	0	0	0	0	0	0	0	0	0	0	3	0	0	no disease		0			0		0		0	0	0	0	20646	0.78617	0	0	0	0		no disease
1	23-4-F3	23	pre-treatment	2016-04-11	23	4	4F3	expt sheep	F3	Back left	back foot	left	foot	0	0	0	0	0	0	0	0	0	0	0	0	3	0	0	no disease		0				0	0		0	0	0	0	20555	0	0	0	0	0		no disease
1	9-12-F2	9	pre-treatment	2016-02-22	9	12	12F2	expt sheep	F2	Front right	front foot	right	foot	23.6827	0	0	0	0	1	0	0	0	0	0	0	3	0	0	no disease		1					0		0	0	0	0	20506	1.39239	0	0	0	0		codd
1	27-27-F4	27	pre-treatment	2016-04-25	27	27	27F4	expt sheep	F4	Back right	back foot	right	foot	73.1816	0	0	1.07612	23.3524	1	1	0	0	0	1	1	3	0	0	no disease		0			0		0		0	0	0	0	20569	1.8703	0	0	0.317252	1.38654	0.910777	scald
1	43-18-F1	43	post-treatment	2016-06-13	43	18	18F1	expt sheep	F1	Front left	front foot	left	foot	188.73	0	252.691	9.3498	17.315	1	1	0	1	0	1	1	3	0	0	no disease		1	0				0		0	0	0	0	20618	2.27813	0	2.4043	1.01493	1.26281	1.96904	no disease
1	21-11-F2	21	pre-treatment	2016-04-04	21	11	11F2	expt sheep	F2	Front right	front foot	right	foot	0	0	0	0	0	0	0	0	0	0	0	0	3	0	0	no disease		1		0			0		0	0	0	0	20548	0	0	0	0	0		scald
1	15-12-F4	15	pre-treatment	2016-03-14	15	12	12F4	expt sheep	F4	Back right	back foot	right	foot	0	0	0	0	9.63026	0	0	0	0	0	0	0	3	0	0	no disease		0			0		0		0	0	0	0	20527	0	0	0	0	1.02654	0.506517	no disease
1	41-8-F4	41	pre-treatment	2016-06-06	41	8	8F4	expt sheep	F4	Back right	back foot	right	foot	0	0	43.6073	5.90741	28.456	1	0	0	1	0	1	1	2	3	0	no disease		0			0		0		0	0	0	0	20611	0	0	1.64941	0.839315	1.46917	1.41481	scald
1	35-14-F3	35	pre-treatment	2016-05-23	35	14	14F3	expt sheep	F3	Back left	back foot	left	foot	5932.64	1128.39	14489	1197.65	6954.06	1	1	1	1	1	1	1	1	3	CODD	CODD	CODD only	0				2	2	codd1-4	0	0	1	0	20597	3.77332	3.05284	4.16107	3.07869	3.8423	3.87777	codd
1	19-2-F3	19	pre-treatment	2016-03-28	19	2	2F3	expt sheep	F3	Back left	back foot	left	foot	0	270.437	0	2.40603	0	1	0	1	0	0	0	0	4	0	0	no disease		0				0	0		0	0	0	0	20541	0	2.43367	0	0.532248	0	-0.095821	footrot
1	43-29-F4	43	post-treatment	2016-06-13	43	29	29F4	expt sheep	F4	Back right	back foot	right	foot	0	0	46.1792	1.22754	0	1	0	0	1	0	0	1	3	1	0	no disease		1			0		0		0	0	0	0	20618	0	0	1.67375	0.347825	0	1.19872	scald
1	47-25-F3	47	post-treatment	2016-06-27	47	25	25F3	expt sheep	F3	Back left	back foot	left	foot	0	0	0	0	0	0	0	0	0	0	0	0	3	0	0	no disease		1				0	0		0	0	0	0	20632	0	0	0	0	0		no disease
1	13-30-F3	13	pre-treatment	2016-03-07	13	30	30F3	expt sheep	F3	Back left	back foot	left	foot	9.12723	0	0	4.03792	6.51221	0	0	0	0	0	0	0	3	0	0	no disease		1				0	0		0	0	0	0	20520	1.00549	0	0	0.702251	0.875768	0.546137	scald
1	47-7-F2	47	post-treatment	2016-06-27	47	7	7F2	expt sheep	F2	Front right	front foot	right	foot	0	0	0	2.37288	10.535	0	0	0	0	0	1	1	2	0	0	no disease		1		0			0		0	0	0	0	20632	0	0	0	0.528001	1.06202	0.633735	codd
1	9-6-F4	9	pre-treatment	2016-02-22		6	6F4	expt sheep	F4	Back right	back foot	right	foot	0	0	0	0	0	0	0	0	0	0	0	0			0	no disease					0		0		0	0	0	0		0	0	0	0	0		no disease
1	35-6-F4	35	pre-treatment	2016-05-23	35	6	6F4	expt sheep	F4	Back right	back foot	right	foot	103.459	0	164.227	8.13561	5.90971	1	1	0	1	0	0	1	2	3	0	no disease		0			0		0		0	0	0	0	20597	2.01894	0	2.21808	0.960738	0.83946	1.77396	no disease
1	33-28-F1	33	pre-treatment	2016-05-16	33	28	28F1	expt sheep	F1	Front left	front foot	left	foot	0	0	0	0	0	0	0	0	0	0	0	0	3	0	0	no disease		1	0				0		0	0	0	0	20590	0	0	0	0	0		no disease
0	35-25-F2	35	pre-treatment	2016-05-23	35	25	25F2	expt sheep	F2	Front right	front foot	right	foot	0	0	0	0	11.889	0	0	0	0	0	1	1	3	0	0	no disease		0		0			0		0	0	0	0	20597	0	0	0	0	1.11022	0.598024	no disease
1	29-18-F3	29	pre-treatment	2016-05-03	29	18	18F3	expt sheep	F3	Back left	back foot	left	foot	0	0	0	1.79664	2.69129	0	0	0	0	0	0	0	3	0	0	no disease		1				0	0		0	0	0	0	20577	0	0	0	0.446637	0.567179	0.174925	no disease
1	21-18-F1	21	pre-treatment	2016-04-04	21	18	18F1	expt sheep	F1	Front left	front foot	left	foot	0	0	0	0	0	0	0	0	0	0	0	0	4	0	0	no disease		1	0				0		0	0	0	0	20548	0	0	0	0	0		no disease
1	5-10-F1	5	pre-treatment	2016-02-08	5	10	10F1	expt sheep	F1	Front left	front foot	left	foot	5.60896	0	0	0	0	0	0	0	0	0	0	0	3	0	0	no disease		1	0				0		0	0	0	0	20492	0.820133	0	0	0	0		no disease
1	23-11-F4	23	pre-treatment	2016-04-11	23	11	11F4	expt sheep	F4	Back right	back foot	right	foot	0	0	0	0	0	0	0	0	0	0	0	0	3	0	0	no disease		0			0		0		0	0	0	0	20555	0	0	0	0	0		no disease
1	23-23-F1	23	pre-treatment	2016-04-11	23	23	23F1	expt sheep	F1	Front left	front foot	left	foot	0	0	0	0	0	0	0	0	0	0	0	0	2	3	0	no disease		0	0				0		0	0	0	0	20555	0	0	0	0	0		no disease
0	3-33-F2	3	pre-treatment	2016-02-02	3	33	33F2	source sheep	F2	Front right	front foot	right	foot	0	0	0	0	28.6307	1	0	0	0	0	1	1	2	3	0	no disease		1		0			0		0	0	0	0	20486	0	0	0	0	1.47174	0.979711
1	9-12-F1	9	pre-treatment	2016-02-22	9	12	12F1	expt sheep	F1	Front left	front foot	left	foot	24.688	0	0	0	0	1	0	0	0	0	0	0	3	0	0	no disease		1	0				0		0	0	0	0	20506	1.40973	0	0	0	0		no disease
1	19-22-F1	19	pre-treatment	2016-03-28	19	22	22F1	expt sheep	F1	Front left	front foot	left	foot	0	0	0	0	0	0	0	0	0	0	0	0	4	0	0	no disease		0	0				0		0	0	0	0	20541	0	0	0	0	0		scald
1	33-48-F1	33	pre-treatment	2016-05-16	33	48	48F1	source sheep	F1	Front left	front foot	left	foot	6034.82	0	787.983	59.0436	630.819	1	1	0	1	1	1	1	2	3	0	no disease		1	0				0		0	0	0	0	20590	3.78074	0	2.89707	1.77847	2.80059	2.69251
1	11-17-F4	11	pre-treatment	2016-02-29	11	17	17F4	expt sheep	F4	Back right	back foot	right	foot	22.1601	0	0	0	4.09181	1	0	0	0	0	0	0	4	0	scald	ID		0			0		0		1	0	0	0	20513	1.36474	0	0	0	0.706872	0.134794	scald
1	31-15-F4	31	pre-treatment	2016-05-09	31	15	15F4	expt sheep	F4	Back right	back foot	right	foot	9.1557	0	0	0	0	0	0	0	0	0	0	0	2	3	scald	ID		0			0		0		1	0	0	0	20583	1.00671	0	0	0	0		footrot
1	23-24-F1	23	pre-treatment	2016-04-11	23	24	24F1	expt sheep	F1	Front left	front foot	left	foot	0	0	0	0	0	0	0	0	0	0	0	0	3	0	0	no disease		0	0				0		0	0	0	0	20555	0	0	0	0	0		no disease
1	21-15-F1	21	pre-treatment	2016-04-04	21	15	15F1	expt sheep	F1	Front left	front foot	left	foot	431.425	102402	0	84.0678	539.244	1	1	1	0	1	1	1	3	3	footrot	FR		1	0				0		0	1	0	0	20548	2.63591	5.01031	0	1.92976	2.73259	2.31758	codd
1	17-17-F1	17	pre-treatment	2016-03-21	17	17	17F1	expt sheep	F1	Front left	front foot	left	foot	0	0	0	0	0	0	0	0	0	0	0	0	4	0	0	no disease		1	0				0		0	0	0	0	20534	0	0	0	0	0		no disease
1	33-3-F4	33	pre-treatment	2016-05-16	33	3	3F4	expt sheep	F4	Back right	back foot	right	foot	0	0	1166.51	82.0072	193.363	1	0	0	1	1	1	1	3	3	0	no disease		1			0		0		0	0	0	0	20590	0	0	3.06726	1.91912	2.28861	2.68181	no disease
1	25-29-F3	25	pre-treatment	2016-04-18	25	29	29F3	expt sheep	F3	Back left	back foot	left	foot	26.0628	0	0	0	0	1	0	0	0	0	0	0	3	0	0	no disease		1				0	0		0	0	0	0	20562	1.43237	0	0	0	0		no disease
0	1-28-F4	1	pre-treatment	2016-01-26	1	28	28F4	expt sheep	F4	Back right	back foot	right	foot	0	0	0	0	0	0	0	0	0	0	0	0	3	0	0	no disease		1			0		0		0	0	0	0	20479	0	0	0	0	0		scald
1	27-22-F2	27	pre-treatment	2016-04-25	27	22	22F2	expt sheep	F2	Front right	front foot	right	foot	0	0	0	0	0	0	0	0	0	0	0	0	4	0	0	no disease		0		0			0		0	0	0	0	20569	0	0	0	0	0		no disease
1	51-11-F3	51	post-treatment	2016-07-11	51	11	11F3	expt sheep	F3	Back left	back foot	left	foot	0	0	0	0	0	0	0	0	0	0	0	0	3	0	0	no disease		0				0	0		0	0	0	0	20646	0	0	0	0	0		scald
0	31-25-F3	31	pre-treatment	2016-05-09	31	25	25F3	expt sheep	F3	Back left	back foot	left	foot	0	0	0	0	0	0	0	0	0	0	0	0	2	0	0	no disease		0				0	0		0	0	0	0	20583	0	0	0	0	0		no disease
1	35-16-F4	35	pre-treatment	2016-05-23	35	16	16F4	expt sheep	F4	Back right	back foot	right	foot	36160	33565	23198.7	12344.8	3350.15	1	1	1	1	1	1	1	3	0	0	no disease		0			0		0		0	0	0	0	20597	4.55824	4.5259	4.36548	4.09152	3.52519	4.11276	no disease
1	5-27-F1	5	pre-treatment	2016-02-08	5	27	27F1	expt sheep	F1	Front left	front foot	left	foot	0	0	0	0	4.09558	0	0	0	0	0	0	0	3	0	0	no disease		1	0				0		0	0	0	0	20492	0	0	0	0	0.707194	0.135194	no disease
1	15-4-F1	15	pre-treatment	2016-03-14	15	4	4F1	expt sheep	F1	Front left	front foot	left	foot	0	0	0	3.03897	0	0	0	0	0	0	0	0	4	0	overgrown	other		0	0				0		0	0	0	1	20527	0	0	0	0.606271	0	0.00560573	codd
1	33-4-F2	33	pre-treatment	2016-05-16	33	4	4F2	expt sheep	F2	Front right	front foot	right	foot	0	0	64.386	0	12.9074	1	0	0	1	0	1	1	3	3	0	no disease		1		0			0		0	0	0	0	20590	0	0	1.81548	0	1.14325	1.41102	scald
1	7-25-F1	7	pre-treatment	2016-02-15	7	25	25F1	expt sheep	F1	Front left	front foot	left	foot	4.90045	0	0	0	0	0	0	0	0	0	0	0	5	0	0	no disease		0	0				0		0	0	0	0	20499	0.770885	0	0	0	0		no disease
0	1-25-F1	1	pre-treatment	2016-01-26	1	25	25F1	expt sheep	F1	Front left	front foot	left	foot	0	0	0	0	0	0	0	0	0	0	0	0	2	0	0	no disease		1	0				0		0	0	0	0	20479	0	0	0	0	0		no disease
1	17-3-F2	17	pre-treatment	2016-03-21	17	3	3F2	expt sheep	F2	Front right	front foot	right	foot	0	0	0	0	2.95159	0	0	0	0	0	0	0	4	0	0	no disease		1		0			0		0	0	0	0	20534	0	0	0	0	0.596772	-0.00706556	codd
1	33-30-F2	33	pre-treatment	2016-05-16	33	30	30F2	expt sheep	F2	Front right	front foot	right	foot	0	0	0	6.9664	0	0	0	0	0	0	0	0	3	0	0	no disease		1		0			0		0	0	0	0	20590	0	0	0	0.901262	0	0.365887	scald
1	11-5-F4	11	pre-treatment	2016-02-29	11	5	5F4	expt sheep	F4	Back right	back foot	right	foot	0	0	0	0	5.74967	0	0	0	0	0	0	0	3	0	0	no disease		0			0		0		0	0	0	0	20513	0	0	0	0	0.829282	0.282521	codd
1	43-8-F4	43	post-treatment	2016-06-13	43	8	8F4	expt sheep	F4	Back right	back foot	right	foot	0	1798.82	0	14.8306	0	1	0	1	0	0	0	0	2	2	0	no disease		1			0		0		0	0	0	0	20618	0	3.25523	0	1.1995	0	0.694038	scald
1	9-17-F1	9	pre-treatment	2016-02-22	9	17	17F1	expt sheep	F1	Front left	front foot	left	foot	0	0	0	0	4.80337	0	0	0	0	0	0	0	4	0	0	no disease		1	0				0		0	0	0	0	20506	0	0	0	0	0.76368	0.204425	no disease
1	33-7-F1	33	pre-treatment	2016-05-16	33	7	7F1	expt sheep	F1	Front left	front foot	left	foot	0	8881.46	0	0	0	1	0	1	0	0	0	0	3	3	scald	ID		1	0				0		1	0	0	0	20590	0	3.94853	0	0	0		codd
1	7-8-F4	7	pre-treatment	2016-02-15		8	8F4	expt sheep	F4	Back right	back foot	right	foot	0	39.574	0	0	25.4947	1	0	0	0	0	1	1			0	no disease					0		0		0	0	0	0		0	1.60825	0	0	1.42316	0.929329	scald
1	23-28-F2	23	pre-treatment	2016-04-11	23	28	28F2	expt sheep	F2	Front right	front foot	right	foot	0	0	0	0	0	0	0	0	0	0	0	0	3	0	0	no disease		0		0			0		0	0	0	0	20555	0	0	0	0	0		footrot
1	13-29-F3	13	pre-treatment	2016-03-07	13	29	29F3	expt sheep	F3	Back left	back foot	left	foot	17.3856	0	83.5442	2.04305	5.32548	1	0	0	1	0	0	1	3	0	0	no disease		1				0	0		0	0	0	0	20520	1.26448	0	1.92708	0.483309	0.801093	1.4815	no disease
1	21-8-F3	21	pre-treatment	2016-04-04	21	8	8F3	expt sheep	F3	Back left	back foot	left	foot	0	11925.7	0	0	5.55044	1	0	1	0	0	0	0	3	0	0	no disease		1				0	0		0	0	0	0	20548	0	4.07652	0	0	0.81627	0.267206	codd
1	31-28-F2	31	pre-treatment	2016-05-09	31	28	28F2	expt sheep	F2	Front right	front foot	right	foot	0	0	0	0	0	0	0	0	0	0	0	0	3	0	0	no disease		0		0			0		0	0	0	0	20583	0	0	0	0	0		footrot
0	3-31-F4	3	pre-treatment	2016-02-02	3	31	31F4	source sheep	F4	Back right	back foot	right	foot	0	0	0	0	0	0	0	0	0	0	0	0	2	3	0	no disease		1			0		0		0	0	0	0	20486	0	0	0	0	0
1	23-11-F3	23	pre-treatment	2016-04-11	23	11	11F3	expt sheep	F3	Back left	back foot	left	foot	0	0	0	0	0	0	0	0	0	0	0	0	3	0	0	no disease		0				0	0		0	0	0	0	20555	0	0	0	0	0		scald
1	33-27-F4	33	pre-treatment	2016-05-16	33	27	27F4	expt sheep	F4	Back right	back foot	right	foot	0	0	0	6.43593	6.47251	0	0	0	0	0	0	0	3	0	0	no disease		1			0		0		0	0	0	0	20590	0	0	0	0.871335	0.873467	0.633753	scald
1	23-3-F1	23	pre-treatment	2016-04-11	23	3	3F1	expt sheep	F1	Front left	front foot	left	foot	0	96.3343	0	0	10.6443	1	0	1	0	0	1	1	4	0	0	no disease		0	0				0		0	0	0	0	20555	0	1.98827	0	0	1.06612	0.549998	codd
1	5-22-F3	5	pre-treatment	2016-02-08	5	22	22F3	expt sheep	F3	Back left	back foot	left	foot	0	0	0	0	0	0	0	0	0	0	0	0	3	0	0	no disease		1				0	0		0	0	0	0	20492	0	0	0	0	0		scald
1	11-7-F2	11	pre-treatment	2016-02-29	11	7	7F2	expt sheep	F2	Front right	front foot	right	foot	0	0	0	0	0	0	0	0	0	0	0	0	4	0	0	no disease		0		0			0		0	0	0	0	20513	0	0	0	0	0		codd
1	27-26-F4	27	pre-treatment	2016-04-25	27	26	26F4	expt sheep	F4	Back right	back foot	right	foot	5.45691	0	0	0	0	0	0	0	0	0	0	0	3	0	0	no disease		0			0		0		0	0	0	0	20569	0.810025	0	0	0	0		no disease
1	17-30-F2	17	pre-treatment	2016-03-21	17	30	30F2	expt sheep	F2	Front right	front foot	right	foot	114.063	0	0	3.14185	3.85844	1	1	0	0	0	0	0	4	0	0	no disease		1		0			0		0	0	0	0	20534	2.06094	0	0	0.617194	0.686497	0.367995	scald
0	29-13-F2	29	pre-treatment	2016-05-03	29	13	13F2	expt sheep	F2	Front right	front foot	right	foot	0	0	0	0	6.03747	0	0	0	0	0	0	0	3	0	0	no disease		1		0			0		0	0	0	0	20577	0	0	0	0	0.847417	0.303734	no disease
1	38-4-F4	38	pre-treatment	2016-05-31	38	4	4F4	expt sheep	F4	Back right	back foot	right	foot	0	0	0	0	9.29774	0	0	0	0	0	0	0	2	3	0	no disease		1			0		0		0	0	0	0	20605	0	0	0	0	1.01274	0.491256	no disease
1	15-25-F1	15	pre-treatment	2016-03-14	15	25	25F1	expt sheep	F1	Front left	front foot	left	foot	0	0	0	0	3.2062	0	0	0	0	0	0	0	4	0	0	no disease		0	0				0		0	0	0	0	20527	0	0	0	0	0.62389	0.0288695	no disease
1	35-10-F2	35	pre-treatment	2016-05-23	35	10	10F2	expt sheep	F2	Front right	front foot	right	foot	0	0	0	0.547324	0	0	0	0	0	0	0	0	3	2	0	no disease		0		0			0		0	0	0	0	20597	0	0	0	0.189581	0	-0.738877	footrot
1	21-5-F1	21	pre-treatment	2016-04-04	21	5	5F1	expt sheep	F1	Front left	front foot	left	foot	0	761.309	0	5.38186	0	1	0	1	0	0	0	0	3	0	0	no disease		1	0				0		0	0	0	0	20548	0	2.88213	0	0.804947	0	0.253811	codd
1	43-9-F2	43	post-treatment	2016-06-13	43	9	9F2	expt sheep	F2	Front right	front foot	right	foot	0	0	0	0	0	0	0	0	0	0	0	0	2	0	0	no disease		1		0			0		0	0	0	0	20618	0	0	0	0	0		codd
1	21-18-F3	21	pre-treatment	2016-04-04	21	18	18F3	expt sheep	F3	Back left	back foot	left	foot	0	0	0	0	0	0	0	0	0	0	0	0	4	0	0	no disease		1				0	0		0	0	0	0	20548	0	0	0	0	0		no disease
1	13-26-F3	13	pre-treatment	2016-03-07	13	26	26F3	expt sheep	F3	Back left	back foot	left	foot	48.9201	0	94.0502	18.0347	14.4226	1	1	0	1	0	1	1	3	0	0	no disease		1				0	0		0	0	0	0	20520	1.69828	0	1.97795	1.27955	1.18816	1.625	no disease
1	27-9-F2	27	pre-treatment	2016-04-25	27	9	9F2	expt sheep	F2	Front right	front foot	right	foot	9343.96	5840.96	0	1370.48	854.927	1	1	1	0	1	1	1	3	3	footrot	FR		0		0			0		0	1	0	0	20569	3.97058	3.76656	0	3.13719	2.93244	2.87029	codd
1	13-28-F2	13	pre-treatment	2016-03-07	13	28	28F2	expt sheep	F2	Front right	front foot	right	foot	7.16661	0	0	0	4.12451	0	0	0	0	0	0	0	3	0	0	no disease		1		0			0		0	0	0	0	20520	0.912042	0	0	0	0.709652	0.138251	footrot
1	31-29-F1	31	pre-treatment	2016-05-09	31	29	29F1	expt sheep	F1	Front left	front foot	left	foot	18.5862	0	0	0	0	0	0	0	0	0	0	0	3	0	0	no disease		0	0				0		0	0	0	0	20583	1.29195	0	0	0	0		footrot
1	47-4-F3	47	post-treatment	2016-06-27	47	4	4F3	expt sheep	F3	Back left	back foot	left	foot	0	0	0	0	0	0	0	0	0	0	0	0	3	1	0	no disease		1				0	0		0	0	0	0	20632	0	0	0	0	0		no disease
1	27-9-F3	27	pre-treatment	2016-04-25	27	9	9F3	expt sheep	F3	Back left	back foot	left	foot	8.72553	0	0	0	27.5353	1	0	0	0	0	1	1	3	3	0	no disease		0				0	0		0	0	0	0	20569	0.987913	0	0	0	1.45538	0.962769	no disease
1	29-23-F3	29	pre-treatment	2016-05-03	29	23	23F3	expt sheep	F3	Back left	back foot	left	foot	59.4075	0	4576.33	308.204	1101.12	1	1	0	1	1	1	1	2	3	0	no disease		1				0	0		0	0	0	0	20577	1.78109	0	3.66061	2.49025	3.04223	3.29999	codd
1	21-21-F3	21	pre-treatment	2016-04-04	21	21	21F3	expt sheep	F3	Back left	back foot	left	foot	0	71.4162	0	0	0	1	0	1	0	0	0	0	4	0	0	no disease		1				0	0		0	0	0	0	20548	0	1.85984	0	0	0		no disease
1	51-16-F3	51	post-treatment	2016-07-11	51	16	16F3	expt sheep	F3	Back left	back foot	left	foot	5.20395	0	0	0	0	0	0	0	0	0	0	0	3	0	0	no disease		0				0	0		0	0	0	0	20646	0.792668	0	0	0	0		no disease
1	25-10-F4	25	pre-treatment	2016-04-18	25	10	10F4	expt sheep	F4	Back right	back foot	right	foot	9.41467	0	0	0	4.34004	0	0	0	0	0	0	0	3	0	0	no disease		1			0		0		0	0	0	0	20562	1.01765	0	0	0	0.727544	0.160372	codd
1	23-17-F2	23	pre-treatment	2016-04-11	23	17	17F2	expt sheep	F2	Front right	front foot	right	foot	0	0	0	0	0	0	0	0	0	0	0	0	3	0	0	no disease		0		0			0		0	0	0	0	20555	0	0	0	0	0		codd
1	43-24-F4	43	post-treatment	2016-06-13	43	24	24F4	expt sheep	F4	Back right	back foot	right	foot	0	0	47.7937	0	0	1	0	0	1	0	0	1	3	0	0	no disease		1			0		0		0	0	0	0	20618	0	0	1.68836	0	0	1.20225	no disease
0	1-23-F3	1	pre-treatment	2016-01-26	1	23	23F3	expt sheep	F3	Back left	back foot	left	foot	0	0	0	0	0	0	0	0	0	0	0	0	2	0	0	no disease		1				0	0		0	0	0	0	20479	0	0	0	0	0		codd
1	25-9-F3	25	pre-treatment	2016-04-18	25	9	9F3	expt sheep	F3	Back left	back foot	left	foot	0	0	0	6.87161	7.89995	0	0	0	0	0	0	0	3	2	0	no disease		1				0	0		0	0	0	0	20562	0	0	0	0.896064	0.949387	0.692305	no disease
1	29-18-F4	29	pre-treatment	2016-05-03	29	18	18F4	expt sheep	F4	Back right	back foot	right	foot	0	0	0	0	0	0	0	0	0	0	0	0	3	0	0	no disease		1			0		0		0	0	0	0	20577	0	0	0	0	0		no disease
1	5-2-F3	5	pre-treatment	2016-02-08	5	2	2F3	expt sheep	F3	Back left	back foot	left	foot	0	0	0	0	0	0	0	0	0	0	0	0	3	0	0	no disease		1				0	0		0	0	0	0	20492	0	0	0	0	0		footrot
1	29-16-F3	29	pre-treatment	2016-05-03	29	16	16F3	expt sheep	F3	Back left	back foot	left	foot	0	0	0	0	2.63829	0	0	0	0	0	0	0	3	0	0	no disease		1				0	0		0	0	0	0	20577	0	0	0	0	0.560897	-0.055799	no disease
1	38-7-F2	38	pre-treatment	2016-05-31	38	7	7F2	expt sheep	F2	Front right	front foot	right	foot	1508.9	9114.09	23349.3	3763.34	6869.63	1	1	1	1	1	1	1	2	3	fr&CODD	CODD	CODD & footrot	1		1			1	codd1-4	0	0	1	0	20605	3.17895	3.95976	4.36829	3.57569	3.837	4.05413	codd
1	5-12-F1	5	pre-treatment	2016-02-08	5	12	12F1	expt sheep	F1	Front left	front foot	left	foot	2.3042	0	0	0	0	0	0	0	0	0	0	0	3	0	0	no disease		1	0				0		0	0	0	0	20492	0.519066	0	0	0	0		no disease
1	47-18-F3	47	post-treatment	2016-06-27	47	18	18F3	expt sheep	F3	Back left	back foot	left	foot	0	0	0	0	0	0	0	0	0	0	0	0	3	0	0	no disease		1				0	0		0	0	0	0	20632	0	0	0	0	0		no disease
1	19-7-F1	19	pre-treatment	2016-03-28	19	7	7F1	expt sheep	F1	Front left	front foot	left	foot	0	0	0	0	0	0	0	0	0	0	0	0	3	0	0	no disease		0	0				0		0	0	0	0	20541	0	0	0	0	0		codd
1	5-22-F1	5	pre-treatment	2016-02-08	5	22	22F1	expt sheep	F1	Front left	front foot	left	foot	0	0	0	0	0	0	0	0	0	0	0	0	3	0	0	no disease		1	0				0		0	0	0	0	20492	0	0	0	0	0		scald
1	41-11-F1	41	pre-treatment	2016-06-06	41	11	11F1	expt sheep	F1	Front left	front foot	left	foot	0	1001.34	0	0	5.8925	1	0	1	0	0	0	0	3	0	0	no disease		0	0				0		0	0	0	0	20611	0	3.00102	0	0	0.838377	0.293178	scald
1	17-24-F3	17	pre-treatment	2016-03-21	17	24	24F3	expt sheep	F3	Back left	back foot	left	foot	0	0	0	0	0	0	0	0	0	0	0	0	4	0	0	no disease		1				0	0		0	0	0	0	20534	0	0	0	0	0		no disease
1	33-13-F2	33	pre-treatment	2016-05-16	33	13	13F2	expt sheep	F2	Front right	front foot	right	foot	0	0	65.7825	0	0	1	0	0	1	0	0	1	2	0	0	no disease		1		0			0		0	0	0	0	20590	0	0	1.82466	0	0	1.34099	no disease
1	7-6-F1	7	pre-treatment	2016-02-15	7	6	6F1	expt sheep	F1	Front left	front foot	left	foot	0	0	0	0	0	0	0	0	0	0	0	0	2	0	0	no disease		0	0				0		0	0	0	0	20499	0	0	0	0	0		codd
1	43-7-F1	43	post-treatment	2016-06-13	43	7	7F1	expt sheep	F1	Front left	front foot	left	foot	29.7272	2060.6	29.8211	0	6.63083	1	0	1	0	0	0	0	3	3	fr&CODD	CODD	CODD & footrot	1	1				1	codd1-4	0	0	1	0	20618	1.48752	3.31421	1.48885	0	0.882572	1.0846	codd
1	13-4-F1	13	pre-treatment	2016-03-07	13	4	4F1	expt sheep	F1	Front left	front foot	left	foot	0	0	229.328	0	118.871	1	0	0	1	0	1	1	3	0	0	no disease		1	0				0		0	0	0	0	20520	0	0	2.36235	0	2.07871	2.06471	codd
0	3-31-F2	3	pre-treatment	2016-02-02	3	31	31F2	source sheep	F2	Front right	front foot	right	foot	0	20.6726	368021	24972.4	66671.8	1	0	0	1	1	1	1	2	3	CODD	CODD	CODD only	1		3			3	codd1-4	0	0	1	0	20486	0	1.33591	5.56587	4.39748	4.82395	5.18532
0	35-22-F3	35	pre-treatment	2016-05-23	35	22	22F3	expt sheep	F3	Back left	back foot	left	foot	20.0402	0	37.3153	0	0	1	0	0	1	0	0	1	3	0	0	no disease		0				0	0		0	0	0	0	20597	1.32305	0	1.58337	0	0	1.09477	scald
1	9-22-F3	9	pre-treatment	2016-02-22	9	22	22F3	expt sheep	F3	Back left	back foot	left	foot	0	0	0	0	0	0	0	0	0	0	0	0	4	0	0	no disease		1					0		0	0	0	0	20506	0	0	0	0	0		scald
1	41-1-F1	41	pre-treatment	2016-06-06	41	1	1F1	expt sheep	F1	Front left	front foot	left	foot	85.7097	0	28.3326	1.03854	6.03215	1	1	0	0	0	0	0	3	0	0	no disease		0	0				0		0	0	0	0	20611	1.93807	0	1.46735	0.309319	0.847088	1.07192	no disease
1	9-4-F3	9	pre-treatment	2016-02-22	9	4	4F3	expt sheep	F3	Back left	back foot	left	foot	0	0	0	0	0	0	0	0	0	0	0	0	3	0	0	no disease		1					0		0	0	0	0	20506	0	0	0	0	0		no disease
1	9-6-F2	9	pre-treatment	2016-02-22	9	6	6F2	expt sheep	F2	Front right	front foot	right	foot	0	0	0	0	0	0	0	0	0	0	0	0	4	0	0	no disease		1		0			0		0	0	0	0	20506	0	0	0	0	0		footrot
1	35-16-F1	35	pre-treatment	2016-05-23	35	16	16F1	expt sheep	F1	Front left	front foot	left	foot	0	0	0	0	0	0	0	0	0	0	0	0	3	0	0	no disease		0	0				0		0	0	0	0	20597	0	0	0	0	0		no disease
1	35-28-F1	35	pre-treatment	2016-05-23	35	28	28F1	expt sheep	F1	Front left	front foot	left	foot	0	0	0	0	0	0	0	0	0	0	0	0	3	0	0	no disease		0	0				0		0	0	0	0	20597	0	0	0	0	0		no disease
1	5-14-F1	5	pre-treatment	2016-02-08	5	14	14F1	expt sheep	F1	Front left	front foot	left	foot	113.589	0	0	0	0	1	1	0	0	0	0	0	3	0	0	no disease		1	0				0		0	0	0	0	20492	2.05914	0	0	0	0		scald
1	21-20-F1	21	pre-treatment	2016-04-04	21	20	20F1	expt sheep	F1	Front left	front foot	left	foot	0	273.143	0	0	0	1	0	1	0	0	0	0	3	0	0	no disease		1	0				0		0	0	0	0	20548	0	2.43798	0	0	0		no disease
1	35-6-F3	35	pre-treatment	2016-05-23	35	6	6F3	expt sheep	F3	Back left	back foot	left	foot	0	0	63.8785	6.66053	14.1703	1	0	0	1	0	1	1	2	3	0	no disease		0				0	0		0	0	0	0	20597	0	0	1.8121	0.884259	1.18099	1.45081	no disease
1	43-13-F1	43	post-treatment	2016-06-13	43	13	13F1	expt sheep	F1	Front left	front foot	left	foot	0	56.4123	0	4.81836	0	1	0	0	0	0	0	0	2	0	0	no disease		1	0				0		0	0	0	0	20618	0	1.759	0	0.7648	0	0.205778	no disease
1	21-30-F2	21	pre-treatment	2016-04-04	21	30	30F2	expt sheep	F2	Front right	front foot	right	foot	12.6886	0	0	0	0	0	0	0	0	0	0	0	3	0	0	no disease		1		0			0		0	0	0	0	20548	1.13636	0	0	0	0		scald
1	43-29-F1	43	post-treatment	2016-06-13	43	29	29F1	expt sheep	F1	Front left	front foot	left	foot	2854.53	6018.23	460.806	59.2119	398.119	1	1	1	1	1	1	1	3	1	scald	ID		1	0				0		1	0	0	0	20618	3.45569	3.77954	2.66446	1.77968	2.6011	2.48579	footrot
1	25-19-F4	25	pre-treatment	2016-04-18	25	19	19F4	expt sheep	F4	Back right	back foot	right	foot	0	0	0	0	0	0	0	0	0	0	0	0	2	0	0	no disease		1			0		0		0	0	0	0	20562	0	0	0	0	0		no disease
1	29-11-F3	29	pre-treatment	2016-05-03	29	11	11F3	expt sheep	F3	Back left	back foot	left	foot	0	0	0	0	3.43031	0	0	0	0	0	0	0	2	0	0	no disease		1				0	0		0	0	0	0	20577	0	0	0	0	0.646434	0.0582122	scald
1	15-22-F3	15	pre-treatment	2016-03-14	15	22	22F3	expt sheep	F3	Back left	back foot	left	foot	15.8359	0	0	0	0	0	0	0	0	0	0	0	4	0	0	no disease		0				0	0		0	0	0	0	20527	1.22624	0	0	0	0		scald
1	27-11-F1	27	pre-treatment	2016-04-25	27	11	11F1	expt sheep	F1	Front left	front foot	left	foot	15.2916	91.6802	0	2.51371	9.39527	1	0	1	0	0	0	0	3	0	0	no disease		0	0				0		0	0	0	0	20569	1.21196	1.96699	0	0.545765	1.01684	0.598753	scald
1	15-25-F3	15	pre-treatment	2016-03-14	15	25	25F3	expt sheep	F3	Back left	back foot	left	foot	59.1619	0	55.4727	3.61568	10.0038	1	1	0	1	0	0	1	4	0	0	no disease		0				0	0		0	0	0	0	20527	1.77932	0	1.75184	0.664236	1.04154	1.36231	no disease
1	35-3-F3	35	pre-treatment	2016-05-23	35	3	3F3	expt sheep	F3	Back left	back foot	left	foot	25.846	0	78.1369	30.6666	0	1	0	0	1	1	0	1	2	3	0	no disease		0				0	0		0	0	0	0	20597	1.42888	0	1.89838	1.5006	0	1.55952	no disease
1	1-19-F2	1	pre-treatment	2016-01-26	1	19	19F2	expt sheep	F2	Front right	front foot	right	foot	0	0	0	0	0	0	0	0	0	0	0	0	2	0	0	no disease		1		0			0		0	0	0	0	20479	0	0	0	0	0		no disease
1	43-13-F3	43	post-treatment	2016-06-13	43	13	13F3	expt sheep	F3	Back left	back foot	left	foot	0	0	0	0	0	0	0	0	0	0	0	0	2	0	0	no disease		1				0	0		0	0	0	0	20618	0	0	0	0	0		no disease
1	13-29-F4	13	pre-treatment	2016-03-07	13	29	29F4	expt sheep	F4	Back right	back foot	right	foot	7.68541	0	59.942	0	0	1	0	0	1	0	0	1	3	0	0	no disease		1			0		0		0	0	0	0	20520	0.93879	0	1.78492	0	0	1.30061	scald
1	21-12-F2	21	pre-treatment	2016-04-04	21	12	12F2	expt sheep	F2	Front right	front foot	right	foot	335.146	0	0	0	0	1	1	0	0	0	0	0	3	0	overgrown	other		1		0			0		0	0	0	1	20548	2.52653	0	0	0	0		codd
1	38-7-F1	38	pre-treatment	2016-05-31	38	7	7F1	expt sheep	F1	Front left	front foot	left	foot	0	332.763	56.8043	0	0	1	0	1	1	0	0	1	2	3	0	no disease		1	0				0		0	0	0	0	20605	0	2.52344	1.76196	0	0	1.27726	codd
1	31-27-F1	31	pre-treatment	2016-05-09	31	27	27F1	expt sheep	F1	Front left	front foot	left	foot	14.1989	0	0	0	0	0	0	0	0	0	0	0	3	0	0	no disease		0	0				0		0	0	0	0	20583	1.18181	0	0	0	0		no disease
1	7-28-F3	7	pre-treatment	2016-02-15	7	28	28F3	expt sheep	F3	Back left	back foot	left	foot	0	0	0	0	0	0	0	0	0	0	0	0	4	0	0	no disease		0				0	0		0	0	0	0	20499	0	0	0	0	0		no disease
1	17-26-F3	17	pre-treatment	2016-03-21	17	26	26F3	expt sheep	F3	Back left	back foot	left	foot	13.1128	0	0	0	0	0	0	0	0	0	0	0	4	0	0	no disease		1				0	0		0	0	0	0	20534	1.14961	0	0	0	0		no disease
1	5-24-F1	5	pre-treatment	2016-02-08	5	24	24F1	expt sheep	F1	Front left	front foot	left	foot	0	0	0	0	0	0	0	0	0	0	0	0	3	0	0	no disease		1	0				0		0	0	0	0	20492	0	0	0	0	0		no disease
1	47-29-F2	47	post-treatment	2016-06-27	47	29	29F2	expt sheep	F2	Front right	front foot	right	foot	0	0	0	0	0	0	0	0	0	0	0	0	3	0	0	no disease		1		0			0		0	0	0	0	20632	0	0	0	0	0		no disease
1	15-27-F4	15	pre-treatment	2016-03-14	15	27	27F4	expt sheep	F4	Back right	back foot	right	foot	20.4971	0	0	6.14255	29.2996	1	0	0	0	0	1	1	4	0	0	no disease		0			0		0		0	0	0	0	20527	1.33238	0	0	0.853854	1.48144	1.0724	scald
1	27-12-F4	27	pre-treatment	2016-04-25	27	12	12F4	expt sheep	F4	Back right	back foot	right	foot	35.4023	252.012	1448.73	358.348	553.376	1	0	1	1	1	1	1	3	3	0	no disease		0			0		0		0	0	0	0	20569	1.56113	2.40314	3.16129	2.55552	2.7438	2.89587	no disease
1	41-28-F3	41	pre-treatment	2016-06-06	41	28	28F3	expt sheep	F3	Back left	back foot	left	foot	0	478.993	0	39.6514	8.51303	1	0	1	0	1	0	1	3	2	0	no disease		0				0	0		0	0	0	0	20611	0	2.68123	0	1.60908	0.978319	1.20561	no disease
1	21-10-F4	21	pre-treatment	2016-04-04	21	10	10F4	expt sheep	F4	Back right	back foot	right	foot	0	0	0	0	0	0	0	0	0	0	0	0	3	0	0	no disease		1			0		0		0	0	0	0	20548	0	0	0	0	0		codd
1	43-6-F4	43	post-treatment	2016-06-13	43	6	6F4	expt sheep	F4	Back right	back foot	right	foot	0	0	0	0	0	0	0	0	0	0	0	0	2	3	0	no disease		1			0		0		0	0	0	0	20618	0	0	0	0	0		no disease
1	31-13-F2	31	pre-treatment	2016-05-09	31	13	13F2	expt sheep	F2	Front right	front foot	right	foot	0	0	0	0	0	0	0	0	0	0	0	0	3	0	0	no disease		0		0			0		0	0	0	0	20583	0	0	0	0	0		no disease
0	17-10-F3	17	pre-treatment	2016-03-21	17	10	10F3	expt sheep	F3	Back left	back foot	left	foot	0	0	0	0	0	0	0	0	0	0	0	0	3	0	0	no disease		1					0		0	0	0	0	20534	0	0	0	0	0		no disease
1	43-14-F1	43	post-treatment	2016-06-13	43	14	14F1	expt sheep	F1	Front left	front foot	left	foot	0	11187.1	0	14.9822	10.7807	1	0	1	0	0	1	1	1	3	0	no disease		1	0				0		0	0	0	0	20618	0	4.04875	0	1.20364	1.07117	0.933873	scald
1	33-12-F2	33	pre-treatment	2016-05-16	33	12	12F2	expt sheep	F2	Front right	front foot	right	foot	10367.8	49492.5	12498.4	2176.87	1037.79	1	1	1	1	1	1	1	2	3	fr&CODD	CODD	CODD & footrot	1		1			1	codd1-4	0	0	1	0	20590	4.01573	4.69455	4.09689	3.33803	3.01653	3.71914	codd
1	9-9-F3	9	pre-treatment	2016-02-22	9	9	9F3	expt sheep	F3	Back left	back foot	left	foot	19.1231	0	0	0	0	0	0	0	0	0	0	0	3	0	0	no disease		1					0		0	0	0	0	20506	1.30369	0	0	0	0		no disease
1	13-12-F2	13	pre-treatment	2016-03-07	13	12	12F2	expt sheep	F2	Front right	front foot	right	foot	6.85657	0	0	0	0	0	0	0	0	0	0	0	3	0	0	no disease		1		0			0		0	0	0	0	20520	0.895233	0	0	0	0		codd
1	25-5-F3	25	pre-treatment	2016-04-18	25	5	5F3	expt sheep	F3	Back left	back foot	left	foot	30.1248	0	0	25.1961	15.4373	1	0	0	0	0	1	1	3	0	0	no disease		1				0	0		0	0	0	0	20562	1.49311	0	0	1.41824	1.21583	1.13176	codd
1	9-19-F2	9	pre-treatment	2016-02-22	9	19	19F2	expt sheep	F2	Front right	front foot	right	foot	25.1235	0	0	0	4.35805	1	0	0	0	0	0	0	2	0	0	no disease		1		0			0		0	0	0	0	20506	1.41703	0	0	0	0.729006	0.162171	no disease
1	19-12-F2	19	pre-treatment	2016-03-28	19	12	12F2	expt sheep	F2	Front right	front foot	right	foot	0	0	0	0	0	0	0	0	0	0	0	0	3	0	0	no disease		0		0			0		0	0	0	0	20541	0	0	0	0	0		codd
1	35-9-F3	35	pre-treatment	2016-05-23	35	9	9F3	expt sheep	F3	Back left	back foot	left	foot	0	0	0	0	0	0	0	0	0	0	0	0	2	2	0	no disease		0				0	0		0	0	0	0	20597	0	0	0	0	0		no disease
1	23-3-F3	23	pre-treatment	2016-04-11	23	3	3F3	expt sheep	F3	Back left	back foot	left	foot	0	0	0	0	0	0	0	0	0	0	0	0	4	0	0	no disease		0				0	0		0	0	0	0	20555	0	0	0	0	0		no disease
1	33-24-F1	33	pre-treatment	2016-05-16	33	24	24F1	expt sheep	F1	Front left	front foot	left	foot	0	872.347	0	1.79265	0	1	0	1	0	0	0	0	3	0	0	no disease		1	0				0		0	0	0	0	20590	0	2.94119	0	0.446017	0	-0.223625	no disease
0	17-12-F1	17	pre-treatment	2016-03-21	17	12	12F1	expt sheep	F1	Front left	front foot	left	foot	0	0	0	0	0	0	0	0	0	0	0	0	2	0	0	no disease		1	0				0		0	0	0	0	20534	0	0	0	0	0		no disease
1	43-13-F4	43	post-treatment	2016-06-13	43	13	13F4	expt sheep	F4	Back right	back foot	right	foot	14.4527	0	0	6.00133	8.92456	0	0	0	0	0	0	0	2	0	0	no disease		1			0		0		0	0	0	0	20618	1.189	0	0	0.845181	0.996711	0.696819	no disease
1	31-10-F4	31	pre-treatment	2016-05-09	31	10	10F4	expt sheep	F4	Back right	back foot	right	foot	11168.4	2353.93	0	0	0	1	1	1	0	0	0	0	3	0	0	no disease		0			0		0		0	0	0	0	20583	4.04803	3.37198	0	0	0		codd
1	29-13-F3	29	pre-treatment	2016-05-03	29	13	13F3	expt sheep	F3	Back left	back foot	left	foot	0	0	0	0	5.68109	0	0	0	0	0	0	0	3	0	0	no disease		1				0	0		0	0	0	0	20577	0	0	0	0	0.824847	0.27731	no disease
1	13-9-F3	13	pre-treatment	2016-03-07	13	9	9F3	expt sheep	F3	Back left	back foot	left	foot	51.2495	0	0	0	12.0571	1	1	0	0	0	1	1	3	0	0	no disease		1				0	0		0	0	0	0	20520	1.71808	0	0	0	1.11585	0.604121	no disease
1	7-17-F1	7	pre-treatment	2016-02-15	7	17	17F1	expt sheep	F1	Front left	front foot	left	foot	9.79091	0	0	0	0	0	0	0	0	0	0	0	4	0	0	no disease		0	0				0		0	0	0	0	20499	1.03306	0	0	0	0		no disease
1	31-7-F1	31	pre-treatment	2016-05-09	31	7	7F1	expt sheep	F1	Front left	front foot	left	foot	18.5122	9717.17	47.8691	0	3.59904	1	0	1	1	0	0	1	3	0	0	no disease		0	0				0		0	0	0	0	20583	1.29031	3.98758	1.68903	0	0.662667	1.23442	codd
1	27-13-F4	27	pre-treatment	2016-04-25	27	13	13F4	expt sheep	F4	Back right	back foot	right	foot	0	0	48.4592	0	0	1	0	0	1	0	0	1	3	0	0	no disease		0			0		0		0	0	0	0	20569	0	0	1.69425	0	0	1.20825	no disease
1	19-7-F2	19	pre-treatment	2016-03-28	19	7	7F2	expt sheep	F2	Front right	front foot	right	foot	0	18269.3	0	0	0	1	0	1	0	0	0	0	3	0	0	no disease		0		0			0		0	0	0	0	20541	0	4.26175	0	0	0		codd
0	1-8-F3	1	pre-treatment	2016-01-26	1	8	8F3	expt sheep	F3	Back left	back foot	left	foot	0	0	0	0	0	0	0	0	0	0	0	0	3	0	0	no disease		1				0	0		0	0	0	0	20479	0	0	0	0	0		codd
0	1-5-F4	1	pre-treatment	2016-01-26	1	5	5F4	expt sheep	F4	Back right	back foot	right	foot	0	0	0	0	0	0	0	0	0	0	0	0	3	0	0	no disease		1			0		0		0	0	0	0	20479	0	0	0	0	0		codd
1	29-14-F2	29	pre-treatment	2016-05-03	29	14	14F2	expt sheep	F2	Front right	front foot	right	foot	27.8584	0	42.5459	2.61227	0	1	0	0	1	0	0	1	2	3	0	no disease		1		0			0		0	0	0	0	20577	1.46027	0	1.63895	0.55778	0	1.17762	scald
1	33-21-F3	33	pre-treatment	2016-05-16	33	21	21F3	expt sheep	F3	Back left	back foot	left	foot	8.95896	0	0	2.62799	0	0	0	0	0	0	0	0	4	0	0	no disease		1				0	0		0	0	0	0	20590	0.998214	0	0	0.559666	0	-0.0574978	no disease
1	11-26-F4	11	pre-treatment	2016-02-29	11	26	26F4	expt sheep	F4	Back right	back foot	right	foot	0	0	0	0	0	0	0	0	0	0	0	0	4	0	0	no disease		0			0		0		0	0	0	0	20513	0	0	0	0	0		no disease
1	31-24-F1	31	pre-treatment	2016-05-09	31	24	24F1	expt sheep	F1	Front left	front foot	left	foot	8.09573	0	0	1.74051	0	0	0	0	0	0	0	0	3	0	0	no disease		0	0				0		0	0	0	0	20583	0.958838	0	0	0.437832	0	-0.236444	no disease
1	13-2-F1	13	pre-treatment	2016-03-07	13	2	2F1	expt sheep	F1	Front left	front foot	left	foot	35.948	0	0	0	0	1	0	0	0	0	0	0	3	0	0	no disease		1	0				0		0	0	0	0	20520	1.56759	0	0	0	0		footrot
1	25-12-F1	25	pre-treatment	2016-04-18	25	12	12F1	expt sheep	F1	Front left	front foot	left	foot	174.389	194.273	0	16.0114	0	1	1	1	0	0	0	0	3	1	0	no disease		1	0				0		0	0	0	0	20562	2.244	2.29064	0	1.23074	0	0.727309	no disease
1	9-26-F3	9	pre-treatment	2016-02-22	9	26	26F3	expt sheep	F3	Back left	back foot	left	foot	0	0	0	0	0	0	0	0	0	0	0	0	4	0	0	no disease		1					0		0	0	0	0	20506	0	0	0	0	0		no disease
1	13-14-F2	13	pre-treatment	2016-03-07	13	14	14F2	expt sheep	F2	Front right	front foot	right	foot	0	0	0	0	0	0	0	0	0	0	0	0	3	0	0	no disease		1		0			0		0	0	0	0	20520	0	0	0	0	0		scald
1	29-9-F3	29	pre-treatment	2016-05-03	29	9	9F3	expt sheep	F3	Back left	back foot	left	foot	0	0	0	0	0	0	0	0	0	0	0	0	2	2	0	no disease		1				0	0		0	0	0	0	20577	0	0	0	0	0		no disease
1	51-16-F1	51	post-treatment	2016-07-11	51	16	16F1	expt sheep	F1	Front left	front foot	left	foot	0	0	0	0	0	0	0	0	0	0	0	0	3	0	0	no disease		0	0				0		0	0	0	0	20646	0	0	0	0	0		no disease
1	7-22-F3	7	pre-treatment	2016-02-15	7	22	22F3	expt sheep	F3	Back left	back foot	left	foot	8.40195	0	0	0	0	0	0	0	0	0	0	0	5	0	0	no disease		0				0	0		0	0	0	0	20499	0.973218	0	0	0	0		scald
1	29-13-F1	29	pre-treatment	2016-05-03	29	13	13F1	expt sheep	F1	Front left	front foot	left	foot	19.0569	0	52.9297	1.46182	10.4355	1	0	0	1	0	1	1	3	0	0	no disease		1	0				0		0	0	0	0	20577	1.30226	0	1.73183	0.391255	1.05825	1.33463	no disease
1	11-17-F1	11	pre-treatment	2016-02-29	11	17	17F1	expt sheep	F1	Front left	front foot	left	foot	0	0	0	0	0	0	0	0	0	0	0	0	4	0	0	no disease		0	0				0		0	0	0	0	20513	0	0	0	0	0		no disease
1	19-12-F1	19	pre-treatment	2016-03-28	19	12	12F1	expt sheep	F1	Front left	front foot	left	foot	0	0	0	0	4.41674	0	0	0	0	0	0	0	3	0	0	no disease		0	0				0		0	0	0	0	20541	0	0	0	0	0.733738	0.16798	no disease
1	29-22-F4	29	pre-treatment	2016-05-03	29	22	22F4	expt sheep	F4	Back right	back foot	right	foot	0	0	0	0	0	0	0	0	0	0	0	0	3	0	0	no disease		1			0		0		0	0	0	0	20577	0	0	0	0	0		no disease
1	38-9-F2	38	pre-treatment	2016-05-31	38	9	9F2	expt sheep	F2	Front right	front foot	right	foot	329.418	2008.25	34.5735	23.7308	123.182	1	1	1	1	0	1	1	3	1	0	no disease		1		0			0		0	0	0	0	20605	2.51906	3.30303	1.55113	1.39324	2.09406	1.78172	codd
1	13-19-F4	13	pre-treatment	2016-03-07	13	19	19F4	expt sheep	F4	Back right	back foot	right	foot	0	0	0	0	0	0	0	0	0	0	0	0	3	0	0	no disease		1			0		0		0	0	0	0	20520	0	0	0	0	0		no disease
1	19-2-F2	19	pre-treatment	2016-03-28	19	2	2F2	expt sheep	F2	Front right	front foot	right	foot	0	0	0	0	0	0	0	0	0	0	0	0	4	0	0	no disease		0		0			0		0	0	0	0	20541	0	0	0	0	0		codd
1	3-36-F4	3	pre-treatment	2016-02-02	3	36	36F4	source sheep	F4	Back right	back foot	right	foot	41.1564	109.644	40.1116	15.9599	2.70362	1	0	1	1	0	0	1	3	3	0	no disease		1			0		0		0	0	0	0	20486	1.62486	2.04393	1.61396	1.22942	0.568626	1.29207
1	23-4-F1	23	pre-treatment	2016-04-11	23	4	4F1	expt sheep	F1	Front left	front foot	left	foot	0	0	0	0	0	0	0	0	0	0	0	0	3	0	0	no disease		0	0				0		0	0	0	0	20555	0	0	0	0	0		codd
1	25-28-F4	25	pre-treatment	2016-04-18	25	28	28F4	expt sheep	F4	Back right	back foot	right	foot	0	0	0	0	21.8467	1	0	0	0	0	1	1	3	0	0	no disease		1			0		0		0	0	0	0	20562	0	0	0	0	1.35882	0.862264	scald
1	33-45-F4	33	pre-treatment	2016-05-16	33	45	45F4	source sheep	F4	Back right	back foot	right	foot	19.52	0	58.2652	64.9545	18.0139	1	0	0	1	1	1	1	2	3	0	no disease		1			0		0		0	0	0	0	20590	1.31218	0	1.7728	1.81924	1.27907	1.67282
1	13-30-F1	13	pre-treatment	2016-03-07	13	30	30F1	expt sheep	F1	Front left	front foot	left	foot	18.8636	0	0	0	7.14212	0	0	0	0	0	0	0	3	0	0	no disease		1	0				0		0	0	0	0	20520	1.29806	0	0	0	0.910737	0.376706	footrot
1	38-15-F1	38	pre-treatment	2016-05-31	38	15	15F1	expt sheep	F1	Front left	front foot	left	foot	4122.4	231552	33.7753	67.5815	5801.77	1	1	1	1	1	1	1	2	3	footrot	FR		1	0				0		0	1	0	0	20605	3.61526	5.36465	1.54127	1.83621	3.76363	3.29396	codd
1	21-18-F4	21	pre-treatment	2016-04-04	21	18	18F4	expt sheep	F4	Back right	back foot	right	foot	0	0	0	0	0	0	0	0	0	0	0	0	4	0	0	no disease		1			0		0		0	0	0	0	20548	0	0	0	0	0		no disease
1	17-24-F1	17	pre-treatment	2016-03-21	17	24	24F1	expt sheep	F1	Front left	front foot	left	foot	0	0	0	0	3.89998	0	0	0	0	0	0	0	4	0	0	no disease		1	0				0		0	0	0	0	20534	0	0	0	0	0.690194	0.113941	no disease
1	47-25-F4	47	post-treatment	2016-06-27	47	25	25F4	expt sheep	F4	Back right	back foot	right	foot	0	0	0	0	0	0	0	0	0	0	0	0	3	0	0	no disease		1			0		0		0	0	0	0	20632	0	0	0	0	0		no disease
1	5-3-F2	5	pre-treatment	2016-02-08	5	3	3F2	expt sheep	F2	Front right	front foot	right	foot	0	0	0	0	0	0	0	0	0	0	0	0	3	0	0	no disease		1		0			0		0	0	0	0	20492	0	0	0	0	0		codd
1	1-18-F4	1	pre-treatment	2016-01-26	1	18	18F4	expt sheep	F4	Back right	back foot	right	foot	13.0807	46.0687	0	0	4.42675	1	0	0	0	0	0	0	2	0	0	no disease		1			0		0		0	0	0	0	20479	1.14862	1.67273	0	0	0.73454	0.168964	no disease
1	27-23-F1	27	pre-treatment	2016-04-25	27	23	23F1	expt sheep	F1	Front left	front foot	left	foot	0	0	30.9689	0	0	1	0	0	0	0	0	0	2	3	0	no disease		0	0				0		0	0	0	0	20569	0	0	1.50473	0	0	1.0138	no disease
1	23-9-F3	23	pre-treatment	2016-04-11	23	9	9F3	expt sheep	F3	Back left	back foot	left	foot	0	0	0	0	0	0	0	0	0	0	0	0	3	0	0	no disease		0				0	0		0	0	0	0	20555	0	0	0	0	0		no disease
1	11-1-F4	11	pre-treatment	2016-02-29	11	1	1F4	expt sheep	F4	Back right	back foot	right	foot	8.48209	0	0	0	0	0	0	0	0	0	0	0	3	0	0	no disease		0			0		0		0	0	0	0	20513	0.976904	0	0	0	0		no disease
1	21-6-F4	21	pre-treatment	2016-04-04	21	6	6F4	expt sheep	F4	Back right	back foot	right	foot	0	0	0	7.39475	0	0	0	0	0	0	0	0	3	0	overgrown	other		1			0		0		0	0	0	1	20548	0	0	0	0.924008	0	0.391802	no disease
1	5-6-F2	5	pre-treatment	2016-02-08	5	6	6F2	expt sheep	F2	Front right	front foot	right	foot	0	0	0	6.97891	0	0	0	0	0	0	0	0	3	0	0	no disease		1		0			0		0	0	0	0	20492	0	0	0	0.901944	0	0.366666	footrot
1	35-26-F3	35	pre-treatment	2016-05-23	35	26	26F3	expt sheep	F3	Back left	back foot	left	foot	23.7132	51.9611	55.0413	21.5218	7.29534	1	0	0	1	0	0	1	3	0	0	no disease		0				0	0		0	0	0	0	20597	1.39293	1.72396	1.74851	1.3526	0.918834	1.44643	no disease
1	7-17-F2	7	pre-treatment	2016-02-15	7	17	17F2	expt sheep	F2	Front right	front foot	right	foot	0	0	0	0	5.28043	0	0	0	0	0	0	0	4	0	0	no disease		0		0			0		0	0	0	0	20499	0	0	0	0	0.797989	0.245548	codd
1	21-5-F3	21	pre-treatment	2016-04-04	21	5	5F3	expt sheep	F3	Back left	back foot	left	foot	0	0	0	0	0	0	0	0	0	0	0	0	3	0	0	no disease		1				0	0		0	0	0	0	20548	0	0	0	0	0		codd
1	27-28-F1	27	pre-treatment	2016-04-25	27	28	28F1	expt sheep	F1	Front left	front foot	left	foot	0	0	0	0	0	0	0	0	0	0	0	0	3	0	0	no disease		0	0				0		0	0	0	0	20569	0	0	0	0	0		no disease
1	47-23-F1	47	post-treatment	2016-06-27	47	23	23F1	expt sheep	F1	Front left	front foot	left	foot	0	0	0	0	0	0	0	0	0	0	0	0	2	1	0	no disease		1	0				0		0	0	0	0	20632	0	0	0	0	0		no disease
0	3-35-F3	3	pre-treatment	2016-02-02	3	35	35F3	source sheep	F3	Back left	back foot	left	foot	0	6386.24	1.22068e+06	70393.9	98458.4	1	0	1	1	1	1	1	2	3	CODD	CODD	CODD only	1				2	2	codd1-4	0	0	1	0	20486	0	3.80531	6.0866	4.84754	4.99326	5.66575
1	31-17-F4	31	pre-treatment	2016-05-09	31	17	17F4	expt sheep	F4	Back right	back foot	right	foot	16.7116	0	0	0	0	0	0	0	0	0	0	0	3	0	0	no disease		0			0		0		0	0	0	0	20583	1.24826	0	0	0	0		scald
1	41-8-F3	41	pre-treatment	2016-06-06	41	8	8F3	expt sheep	F3	Back left	back foot	left	foot	15502.5	200374	196456	30566.8	102076	1	1	1	1	1	1	1	2	3	fr&CODD	CODD	CODD & footrot	0				3	3	codd1-4	0	0	1	0	20611	4.19043	5.30184	5.29327	4.48526	5.00893	5.04021	codd
1	33-16-F3	33	pre-treatment	2016-05-16	33	16	16F3	expt sheep	F3	Back left	back foot	left	foot	0	0	26.9192	0	0	1	0	0	0	0	0	0	3	0	0	no disease		1				0	0		0	0	0	0	20590	0	0	1.4459	0	0	0.952941	no disease
1	29-11-F2	29	pre-treatment	2016-05-03	29	11	11F2	expt sheep	F2	Front right	front foot	right	foot	0	0	0	0	0	0	0	0	0	0	0	0	2	0	0	no disease		1		0			0		0	0	0	0	20577	0	0	0	0	0		scald
1	19-12-F3	19	pre-treatment	2016-03-28	19	12	12F3	expt sheep	F3	Back left	back foot	left	foot	0	0	0	0	0	0	0	0	0	0	0	0	3	0	0	no disease		0				0	0		0	0	0	0	20541	0	0	0	0	0		codd
1	11-27-F1	11	pre-treatment	2016-02-29	11	27	27F1	expt sheep	F1	Front left	front foot	left	foot	10.6718	0	0	0	17.1968	0	0	0	0	0	1	1	3	0	0	no disease		0	0				0		0	0	0	0	20513	1.06714	0	0	0	1.25999	0.758326	no disease
1	5-30-F2	5	pre-treatment	2016-02-08	5	30	30F2	expt sheep	F2	Front right	front foot	right	foot	28.8536	0	0	0	0	1	0	0	0	0	0	0	3	0	0	no disease		1		0			0		0	0	0	0	20492	1.475	0	0	0	0		scald
1	21-3-F4	21	pre-treatment	2016-04-04	21	3	3F4	expt sheep	F4	Back right	back foot	right	foot	0	0	0	0	0	0	0	0	0	0	0	0	4	0	0	no disease		1			0		0		0	0	0	0	20548	0	0	0	0	0		no disease
1	15-3-F3	15	pre-treatment	2016-03-14	15	3	3F3	expt sheep	F3	Back left	back foot	left	foot	0	0	0	0	0	0	0	0	0	0	0	0	4	0	0	no disease		0				0	0		0	0	0	0	20527	0	0	0	0	0		no disease
1	5-10-F3	5	pre-treatment	2016-02-08	5	10	10F3	expt sheep	F3	Back left	back foot	left	foot	0	0	0	0	0	0	0	0	0	0	0	0	3	0	0	no disease		1				0	0		0	0	0	0	20492	0	0	0	0	0		no disease
1	31-11-F1	31	pre-treatment	2016-05-09	31	11	11F1	expt sheep	F1	Front left	front foot	left	foot	0	658.693	0	1.43162	0	1	0	1	0	0	0	0	3	0	0	no disease		0	0				0		0	0	0	0	20583	0	2.81934	0	0.385896	0	-0.321293	scald
1	13-17-F3	13	pre-treatment	2016-03-07	13	17	17F3	expt sheep	F3	Back left	back foot	left	foot	10.7732	0	0	0	0	0	0	0	0	0	0	0	3	0	0	no disease		1				0	0		0	0	0	0	20520	1.0709	0	0	0	0		scald
1	33-16-F4	33	pre-treatment	2016-05-16	33	16	16F4	expt sheep	F4	Back right	back foot	right	foot	0	0	0	0	0	0	0	0	0	0	0	0	3	0	0	no disease		1			0		0		0	0	0	0	20590	0	0	0	0	0		no disease
1	1-18-F3	1	pre-treatment	2016-01-26	1	18	18F3	expt sheep	F3	Back left	back foot	left	foot	0	0	0	0	5.3156	0	0	0	0	0	0	0	2	0	0	no disease		1				0	0		0	0	0	0	20479	0	0	0	0	0.800414	0.248431	no disease
1	43-27-F2	43	post-treatment	2016-06-13	43	27	27F2	expt sheep	F2	Front right	front foot	right	foot	0	0	0	0	3.63746	0	0	0	0	0	0	0	3	0	0	no disease		1		0			0		0	0	0	0	20618	0	0	0	0	0.66628	0.0836765	no disease
1	21-22-F4	21	pre-treatment	2016-04-04	21	22	22F4	expt sheep	F4	Back right	back foot	right	foot	0	0	0	0	0	0	0	0	0	0	0	0	3	0	0	no disease		1			0		0		0	0	0	0	20548	0	0	0	0	0		no disease
1	51-29-F4	51	post-treatment	2016-07-11	51	29	29F4	expt sheep	F4	Back right	back foot	right	foot	0	0	0	0	0	0	0	0	0	0	0	0	3	2	0	no disease		0			0		0		0	0	0	0	20646	0	0	0	0	0		scald
1	33-20-F3	33	pre-treatment	2016-05-16	33	20	20F3	expt sheep	F3	Back left	back foot	left	foot	0	0	0	0	0	0	0	0	0	0	0	0	3	0	0	no disease		1				0	0		0	0	0	0	20590	0	0	0	0	0		no disease
1	13-22-F4	13	pre-treatment	2016-03-07	13	22	22F4	expt sheep	F4	Back right	back foot	right	foot	0	0	110.598	0	0	1	0	0	1	0	0	1	3	0	0	no disease		1			0		0		0	0	0	0	20520	0	0	2.04766	0	0	1.56663	no disease
1	31-24-F4	31	pre-treatment	2016-05-09	31	24	24F4	expt sheep	F4	Back right	back foot	right	foot	0	0	0	0	0	0	0	0	0	0	0	0	3	0	0	no disease		0			0		0		0	0	0	0	20583	0	0	0	0	0		no disease
1	13-17-F4	13	pre-treatment	2016-03-07	13	17	17F4	expt sheep	F4	Back right	back foot	right	foot	67.3853	0	0	0	11.469	1	1	0	0	0	1	1	3	0	0	no disease		1			0		0		0	0	0	0	20520	1.83496	0	0	0	1.09583	0.582403	scald
1	51-29-F3	51	post-treatment	2016-07-11	51	29	29F3	expt sheep	F3	Back left	back foot	left	foot	0	0	0	0	5.92916	0	0	0	0	0	0	0	3	2	0	no disease		0				0	0		0	0	0	0	20646	0	0	0	0	0.840681	0.295872	no disease
1	33-43-F4	33	pre-treatment	2016-05-16	33	43	43F4	source sheep	F4	Back right	back foot	right	foot	0	0	49.0074	18.672	0	1	0	0	1	0	0	1	3	3	0	no disease		1			0		0		0	0	0	0	20590	0	0	1.69903	1.29385	0	1.35333
1	1-15-F1	1	pre-treatment	2016-01-26	1	15	15F1	expt sheep	F1	Front left	front foot	left	foot	38.1803	0	25.2111	0	7.16483	1	0	0	0	0	0	0	2	0	0	no disease		1	0				0		0	0	0	0	20479	1.59307	0	1.41849	0	0.911947	1.0331	codd
1	17-23-F2	17	pre-treatment	2016-03-21	17	23	23F2	expt sheep	F2	Front right	front foot	right	foot	0	0	0	0	0	0	0	0	0	0	0	0	3	0	0	no disease		1		0			0		0	0	0	0	20534	0	0	0	0	0		no disease
1	9-1-F1	9	pre-treatment	2016-02-22	9	1	1F1	expt sheep	F1	Front left	front foot	left	foot	0	0	0	0	0	0	0	0	0	0	0	0	4	0	0	no disease		1	0				0		0	0	0	0	20506	0	0	0	0	0		no disease
1	33-2-F4	33	pre-treatment	2016-05-16	33	2	2F4	expt sheep	F4	Back right	back foot	right	foot	61.7206	9351.2	0	3.5749	50.0129	1	1	1	0	0	1	1	3	3	scald	ID		1			0		0		1	0	0	0	20590	1.79741	3.97091	0	0.660381	1.70768	1.25195	footrot
1	41-17-F4	41	pre-treatment	2016-06-06	41	17	17F4	expt sheep	F4	Back right	back foot	right	foot	0	0	0	0	0	0	0	0	0	0	0	0	3	1	0	no disease		0			0		0		0	0	0	0	20611	0	0	0	0	0		scald
1	25-3-F1	25	pre-treatment	2016-04-18	25	3	3F1	expt sheep	F1	Front left	front foot	left	foot	51128.4	66009.5	219.846	297.697	39.7002	1	1	1	1	1	1	1	3	1	scald	ID		1	0				0		1	0	0	0	20562	4.70867	4.81961	2.34409	2.47523	1.6096	2.26892	codd
0	3-34-F2	3	pre-treatment	2016-02-02	3	34	34F2	source sheep	F2	Front right	front foot	right	foot	0	16.6907	121121	1064.66	5600.1	1	0	0	1	1	1	1	2	3	CODD	CODD	CODD only	1		2			2	codd1-4	0	0	1	0	20486	0	1.24774	5.08322	3.02762	3.74827	4.62936
1	25-21-F4	25	pre-treatment	2016-04-18	25	21	21F4	expt sheep	F4	Back right	back foot	right	foot	20.6172	0	0	0	0	1	0	0	0	0	0	0	4	0	0	no disease		1			0		0		0	0	0	0	20562	1.3348	0	0	0	0		no disease
1	43-12-F4	43	post-treatment	2016-06-13	43	12	12F4	expt sheep	F4	Back right	back foot	right	foot	0	0	0	0	0	0	0	0	0	0	0	0	2	3	0	no disease		1			0		0		0	0	0	0	20618	0	0	0	0	0		no disease
1	51-11-F4	51	post-treatment	2016-07-11	51	11	11F4	expt sheep	F4	Back right	back foot	right	foot	0	0	0	0	0	0	0	0	0	0	0	0	3	0	0	no disease		0			0		0		0	0	0	0	20646	0	0	0	0	0		no disease
1	5-17-F1	5	pre-treatment	2016-02-08	5	17	17F1	expt sheep	F1	Front left	front foot	left	foot	0	0	0	0	0	0	0	0	0	0	0	0	3	0	0	no disease		1	0				0		0	0	0	0	20492	0	0	0	0	0		no disease
1	13-25-F2	13	pre-treatment	2016-03-07	13	25	25F2	expt sheep	F2	Front right	front foot	right	foot	0	0	0	0	0	0	0	0	0	0	0	0	4	0	0	no disease		1		0			0		0	0	0	0	20520	0	0	0	0	0		no disease
1	33-47-F2	33	pre-treatment	2016-05-16	33	47	47F2	source sheep	F2	Front right	front foot	right	foot	51.4452	0	50.3049	27.4182	11.792	1	1	0	1	1	1	1	3	3	0	no disease		1		0			0		0	0	0	0	20590	1.71971	0	1.71016	1.4536	1.10694	1.47478
1	11-28-F1	11	pre-treatment	2016-02-29	11	28	28F1	expt sheep	F1	Front left	front foot	left	foot	0	0	0	0	0	0	0	0	0	0	0	0	3	0	0	no disease		0	0				0		0	0	0	0	20513	0	0	0	0	0		no disease
1	41-29-F3	41	pre-treatment	2016-06-06	41	29	29F3	expt sheep	F3	Back left	back foot	left	foot	0	192.538	0	9.28149	0	1	0	1	0	0	0	0	3	0	0	no disease		0				0	0		0	0	0	0	20611	0	2.28677	0	1.01206	0	0.490497	no disease
1	11-27-F2	11	pre-treatment	2016-02-29	11	27	27F2	expt sheep	F2	Front right	front foot	right	foot	0	0	0	0	0	0	0	0	0	0	0	0	3	0	0	no disease		0		0			0		0	0	0	0	20513	0	0	0	0	0		no disease
1	25-28-F2	25	pre-treatment	2016-04-18	25	28	28F2	expt sheep	F2	Front right	front foot	right	foot	0	0	0	0	0	0	0	0	0	0	0	0	3	0	0	no disease		1		0			0		0	0	0	0	20562	0	0	0	0	0		footrot
1	21-25-F4	21	pre-treatment	2016-04-04	21	25	25F4	expt sheep	F4	Back right	back foot	right	foot	0	0	0	0	14.7189	0	0	0	0	0	1	1	4	0	0	no disease		1			0		0		0	0	0	0	20548	0	0	0	0	1.19642	0.690755	no disease
1	27-6-F2	27	pre-treatment	2016-04-25	27	6	6F2	expt sheep	F2	Front right	front foot	right	foot	0	0	54.3964	4.99939	11.8605	1	0	0	1	0	1	1	3	0	0	no disease		0		0			0		0	0	0	0	20569	0	0	1.74348	0.778107	1.10926	1.3757	footrot
1	33-17-F3	33	pre-treatment	2016-05-16	33	17	17F3	expt sheep	F3	Back left	back foot	left	foot	0	0	47.5822	0	0	1	0	0	1	0	0	1	3	0	0	no disease		1				0	0		0	0	0	0	20590	0	0	1.68648	0	0	1.20032	scald
1	21-13-F3	21	pre-treatment	2016-04-04	21	13	13F3	expt sheep	F3	Back left	back foot	left	foot	23.5872	50.429	0	0	9.2732	1	0	0	0	0	0	0	3	0	0	no disease		1				0	0		0	0	0	0	20548	1.39071	1.71121	0	0	1.01171	0.490108	no disease
1	11-7-F4	11	pre-treatment	2016-02-29	11	7	7F4	expt sheep	F4	Back right	back foot	right	foot	0	0	0	0	0	0	0	0	0	0	0	0	4	0	0	no disease		0			0		0		0	0	0	0	20513	0	0	0	0	0		scald
1	31-9-F3	31	pre-treatment	2016-05-09	31	9	9F3	expt sheep	F3	Back left	back foot	left	foot	124.603	87.3691	3678.25	98.2509	379.943	1	1	1	1	1	1	1	3	2	0	no disease		0				0	0		0	0	0	0	20583	2.099	1.9463	3.56576	1.99673	2.58086	3.1416	no disease
1	47-21-F3	47	post-treatment	2016-06-27	47	21	21F3	expt sheep	F3	Back left	back foot	left	foot	92.5839	0	0	0	0	1	1	0	0	0	0	0	3	0	0	no disease		1				0	0		0	0	0	0	20632	1.9712	0	0	0	0		no disease
1	13-18-F1	13	pre-treatment	2016-03-07	13	18	18F1	expt sheep	F1	Front left	front foot	left	foot	0	0	0	0	0	0	0	0	0	0	0	0	3	0	0	no disease		1	0				0		0	0	0	0	20520	0	0	0	0	0		no disease
1	5-16-F1	5	pre-treatment	2016-02-08	5	16	16F1	expt sheep	F1	Front left	front foot	left	foot	0	0	0	0	0	0	0	0	0	0	0	0	3	0	0	no disease		1	0				0		0	0	0	0	20492	0	0	0	0	0		no disease
0	31-26-F1	31	pre-treatment	2016-05-09	31	26	26F1	expt sheep	F1	Front left	front foot	left	foot	31.085	0	25.1906	1.36047	7.62275	1	0	0	0	0	0	0	3	0	0	no disease		0	0				0		0	0	0	0	20583	1.5063	0	1.41815	0.372998	0.935646	1.05657	codd
1	19-5-F3	19	pre-treatment	2016-03-28	19	5	5F3	expt sheep	F3	Back left	back foot	left	foot	0	0	0	0	0	0	0	0	0	0	0	0	3	0	0	no disease		0				0	0		0	0	0	0	20541	0	0	0	0	0		codd
0	1-3-F4	1	pre-treatment	2016-01-26	1	3	3F4	expt sheep	F4	Back right	back foot	right	foot	0	0	0	0	0	0	0	0	0	0	0	0	3	0	0	no disease		1			0		0		0	0	0	0	20479	0	0	0	0	0		no disease
1	51-24-F3	51	post-treatment	2016-07-11	51	24	24F3	expt sheep	F3	Back left	back foot	left	foot	0	0	0	0	0	0	0	0	0	0	0	0	3	0	0	no disease		0				0	0		0	0	0	0	20646	0	0	0	0	0		no disease
1	5-11-F2	5	pre-treatment	2016-02-08	5	11	11F2	expt sheep	F2	Front right	front foot	right	foot	4.60488	0	25.0688	0	0	1	0	0	0	0	0	0	2	0	0	no disease		1		0			0		0	0	0	0	20492	0.748566	0	1.41612	0	0	0.922012	scald
1	7-3-F2	7	pre-treatment	2016-02-15	7	3	3F2	expt sheep	F2	Front right	front foot	right	foot	0	0	0	0	0	0	0	0	0	0	0	0	2	0	0	no disease		0		0			0		0	0	0	0	20499	0	0	0	0	0		codd
1	47-21-F4	47	post-treatment	2016-06-27	47	21	21F4	expt sheep	F4	Back right	back foot	right	foot	32.0815	0	0	0	0	1	0	0	0	0	0	0	3	0	0	no disease		1			0		0		0	0	0	0	20632	1.51959	0	0	0	0		no disease
0	35-24-F4	35	pre-treatment	2016-05-23	35	24	24F4	expt sheep	F4	Back right	back foot	right	foot	26.4318	0	147.92	0	9.69755	1	0	0	1	0	0	1	3	0	0	no disease		0			0		0		0	0	0	0	20597	1.43825	0	2.17295	0	1.02928	1.72048	no disease
1	29-22-F3	29	pre-treatment	2016-05-03	29	22	22F3	expt sheep	F3	Back left	back foot	left	foot	0	0	0	0	0	0	0	0	0	0	0	0	3	0	0	no disease		1				0	0		0	0	0	0	20577	0	0	0	0	0		scald
1	38-6-F3	38	pre-treatment	2016-05-31	38	6	6F3	expt sheep	F3	Back left	back foot	left	foot	0	0	77.6976	26.4472	0	1	0	0	1	0	0	1	2	3	0	no disease		1				0	0		0	0	0	0	20605	0	0	1.89596	1.4385	0	1.54052	no disease
1	11-10-F4	11	pre-treatment	2016-02-29	11	10	10F4	expt sheep	F4	Back right	back foot	right	foot	0	0	0	0	0	0	0	0	0	0	0	0	3	0	0	no disease		0			0		0		0	0	0	0	20513	0	0	0	0	0		codd
0	1-11-F4	1	pre-treatment	2016-01-26	1	11	11F4	expt sheep	F4	Back right	back foot	right	foot	0	0	0	0	0	0	0	0	0	0	0	0	2	0	0	no disease		1			0		0		0	0	0	0	20479	0	0	0	0	0		no disease
1	33-14-F4	33	pre-treatment	2016-05-16	33	14	14F4	expt sheep	F4	Back right	back foot	right	foot	5047.56	21186.8	5531.07	3848.61	683.819	1	1	1	1	1	1	1	2	3	scald	ID		1			0		0		1	0	0	0	20590	3.70317	4.32609	3.74289	3.58542	2.83558	3.52563	codd
1	43-10-F3	43	post-treatment	2016-06-13	43	10	10F3	expt sheep	F3	Back left	back foot	left	foot	0	0	43.5861	0	0	1	0	0	1	0	0	1	2	3	0	no disease		1				0	0		0	0	0	0	20618	0	0	1.6492	0	0	1.16223	no disease
1	41-10-F1	41	pre-treatment	2016-06-06	41	10	10F1	expt sheep	F1	Front left	front foot	left	foot	0	0	0	0	0	0	0	0	0	0	0	0	2	3	0	no disease		0	0				0		0	0	0	0	20611	0	0	0	0	0		no disease
1	21-27-F1	21	pre-treatment	2016-04-04	21	27	27F1	expt sheep	F1	Front left	front foot	left	foot	0	0	0	0	0	0	0	0	0	0	0	0	3	0	0	no disease		1	0				0		0	0	0	0	20548	0	0	0	0	0		no disease
0	29-7-F3	29	pre-treatment	2016-05-03	29	7	7F3	expt sheep	F3	Back left	back foot	left	foot	0	0	0	0.567059	0	0	0	0	0	0	0	0	3	3	0	no disease		1				0	0		0	0	0	0	20577	0	0	0	0.195085	0	-0.723493	scald
0	1-16-F1	1	pre-treatment	2016-01-26	1	16	16F1	expt sheep	F1	Front left	front foot	left	foot	0	0	0	0	6.15596	0	0	0	0	0	0	0	3	0	0	no disease		1	0				0		0	0	0	0	20479	0	0	0	0	0.854668	0.312174	no disease
1	27-25-F3	27	pre-treatment	2016-04-25	27	25	25F3	expt sheep	F3	Back left	back foot	left	foot	0	0	0	0.553422	0	0	0	0	0	0	0	0	3	0	0	no disease		0				0	0		0	0	0	0	20569	0	0	0	0.191289	0	-0.734065	no disease
1	9-24-F4	9	pre-treatment	2016-02-22		24	24F4	expt sheep	F4	Back right	back foot	right	foot	0	0	0	0	0	0	0	0	0	0	0	0			0	no disease					0		0		0	0	0	0		0	0	0	0	0		no disease
0	1-25-F2	1	pre-treatment	2016-01-26	1	25	25F2	expt sheep	F2	Front right	front foot	right	foot	0	0	0	0	0	0	0	0	0	0	0	0	2	0	0	no disease		1		0			0		0	0	0	0	20479	0	0	0	0	0		no disease
1	29-20-F3	29	pre-treatment	2016-05-03	29	20	20F3	expt sheep	F3	Back left	back foot	left	foot	0	0	0	0	0	0	0	0	0	0	0	0	2	0	0	no disease		1				0	0		0	0	0	0	20577	0	0	0	0	0		no disease
1	38-1-F1	38	pre-treatment	2016-05-31	38	1	1F1	expt sheep	F1	Front left	front foot	left	foot	0	0	0	2.26904	0	0	0	0	0	0	0	0	3	0	0	no disease		1	0				0		0	0	0	0	20605	0	0	0	0.51442	0	-0.121279	no disease
1	23-5-F1	23	pre-treatment	2016-04-11	23	5	5F1	expt sheep	F1	Front left	front foot	left	foot	125.311	1529	0	0	0	1	1	1	0	0	0	0	3	0	scald	ID		0	0				0		1	0	0	0	20555	2.10144	3.18469	0	0	0		codd
1	25-14-F1	25	pre-treatment	2016-04-18	25	14	14F1	expt sheep	F1	Front left	front foot	left	foot	14.7144	0	0	0	0	0	0	0	0	0	0	0	3	0	0	no disease		1	0				0		0	0	0	0	20562	1.1963	0	0	0	0		scald
0	29-4-F4	29	pre-treatment	2016-05-03	29	4	4F4	expt sheep	F4	Back right	back foot	right	foot	0	0	0	0	0	0	0	0	0	0	0	0	3	0	0	no disease		1			0		0		0	0	0	0	20577	0	0	0	0	0		no disease
1	21-13-F4	21	pre-treatment	2016-04-04	21	13	13F4	expt sheep	F4	Back right	back foot	right	foot	0	0	0	0	0	0	0	0	0	0	0	0	3	0	0	no disease		1			0		0		0	0	0	0	20548	0	0	0	0	0		no disease
0	1-10-F3	1	pre-treatment	2016-01-26	1	10	10F3	expt sheep	F3	Back left	back foot	left	foot	0	0	15.1502	0	19.1434	0	0	0	0	0	1	1	3	0	0	no disease		1				0	0		0	0	0	0	20479	0	0	1.20818	0	1.30413	1.05809	no disease
1	35-10-F4	35	pre-treatment	2016-05-23	35	10	10F4	expt sheep	F4	Back right	back foot	right	foot	0	0	0	0.805899	0	0	0	0	0	0	0	0	3	2	scald	ID		0			0		0		1	0	0	0	20597	0	0	0	0.256693	0	-0.570841	codd
1	27-23-F4	27	pre-treatment	2016-04-25	27	23	23F4	expt sheep	F4	Back right	back foot	right	foot	158028	0	252185	4426.59	28015.9	1	1	0	1	1	1	1	2	3	fr&CODD	CODD	CODD & footrot	0			1		1	codd1-4	0	0	1	0	20569	5.19874	0	5.40172	3.64617	4.44742	4.97716	codd
1	7-27-F4	7	pre-treatment	2016-02-15		27	27F4	expt sheep	F4	Back right	back foot	right	foot	29.6073	0	0	0	0	1	0	0	0	0	0	0			0	no disease					0		0		0	0	0	0		1.48583	0	0	0	0		scald
0	3-40-F4	3	pre-treatment	2016-02-03	3	40	40F4	source sheep	F4	Back right	back foot	right	foot	0	0	0	0	0	0	0	0	0	0	0	0	1	3	0	no disease		1			0		0		0	0	0	0	20487	0	0	0	0	0
1	1-12-F3	1	pre-treatment	2016-01-26	1	12	12F3	expt sheep	F3	Back left	back foot	left	foot	37.8375	0	0	0	11.136	1	0	0	0	0	1	1	2	0	0	no disease		1				0	0		0	0	0	0	20479	1.58925	0	0	0	1.08408	0.56961	codd
1	51-10-F1	51	post-treatment	2016-07-11	51	10	10F1	expt sheep	F1	Front left	front foot	left	foot	0	0	0	0	5.59442	0	0	0	0	0	0	0	2	0	0	no disease		0	0				0		0	0	0	0	20646	0	0	0	0	0.819176	0.270634	no disease
1	43-25-F3	43	post-treatment	2016-06-13	43	25	25F3	expt sheep	F3	Back left	back foot	left	foot	0	0	0	0	0	0	0	0	0	0	0	0	3	0	0	no disease		1				0	0		0	0	0	0	20618	0	0	0	0	0		no disease
1	25-16-F4	25	pre-treatment	2016-04-18	25	16	16F4	expt sheep	F4	Back right	back foot	right	foot	32.2674	0	0	0	0	1	0	0	0	0	0	0	3	0	0	no disease		1			0		0		0	0	0	0	20562	1.52202	0	0	0	0		no disease
1	43-8-F2	43	post-treatment	2016-06-13	43	8	8F2	expt sheep	F2	Front right	front foot	right	foot	16.8294	0	12.6103	16.6262	0	0	0	0	0	0	0	0	2	2	0	no disease		1		0			0		0	0	0	0	20618	1.25114	0	1.13387	1.24616	0	0.988804	no disease
1	19-8-F4	19	pre-treatment	2016-03-28	19	8	8F4	expt sheep	F4	Back right	back foot	right	foot	0	0	0	0	5.96795	0	0	0	0	0	0	0	3	0	overgrown	other		0			0		0		0	0	0	1	20541	0	0	0	0	0.843105	0.298704	scald
0	15-26-F4	15	pre-treatment	2016-03-14	15	26	26F4	expt sheep	F4	Back right	back foot	right	foot	0	0	0	0	0	0	0	0	0	0	0	0	3	0	0	no disease		0			0		0		0	0	0	0	20527	0	0	0	0	0		no disease
1	9-17-F3	9	pre-treatment	2016-02-22	9	17	17F3	expt sheep	F3	Back left	back foot	left	foot	14.3847	0	15.8245	0	7.59049	0	0	0	0	0	0	0	4	0	0	no disease		1					0		0	0	0	0	20506	1.18709	0	1.22594	0	0.934018	0.892373	scald
1	25-29-F1	25	pre-treatment	2016-04-18	25	29	29F1	expt sheep	F1	Front left	front foot	left	foot	0	0	0	0	0	0	0	0	0	0	0	0	3	0	0	no disease		1	0				0		0	0	0	0	20562	0	0	0	0	0		footrot
1	33-21-F4	33	pre-treatment	2016-05-16	33	21	21F4	expt sheep	F4	Back right	back foot	right	foot	0	0	0	0	0	0	0	0	0	0	0	0	4	0	0	no disease		1			0		0		0	0	0	0	20590	0	0	0	0	0		no disease
1	47-29-F3	47	post-treatment	2016-06-27	47	29	29F3	expt sheep	F3	Back left	back foot	left	foot	0	0	0	0	0	0	0	0	0	0	0	0	3	0	0	no disease		1				0	0		0	0	0	0	20632	0	0	0	0	0		no disease
1	15-5-F4	15	pre-treatment	2016-03-14	15	5	5F4	expt sheep	F4	Back right	back foot	right	foot	7.45875	0	24.4274	3.43729	0	1	0	0	0	0	0	0	4	0	0	no disease		0			0		0		0	0	0	0	20527	0.927306	0	1.4053	0.647117	0	0.967933	codd
0	35-24-F3	35	pre-treatment	2016-05-23	35	24	24F3	expt sheep	F3	Back left	back foot	left	foot	0	0	0	0	0	0	0	0	0	0	0	0	3	0	0	no disease		0				0	0		0	0	0	0	20597	0	0	0	0	0		no disease
1	9-25-F4	9	pre-treatment	2016-02-22		25	25F4	expt sheep	F4	Back right	back foot	right	foot	0	0	0	0	0	0	0	0	0	0	0	0			0	no disease					0		0		0	0	0	0		0	0	0	0	0		no disease
1	19-17-F3	19	pre-treatment	2016-03-28	19	17	17F3	expt sheep	F3	Back left	back foot	left	foot	17.0678	0	0	0	2.62112	0	0	0	0	0	0	0	4	0	0	no disease		0				0	0		0	0	0	0	20541	1.25691	0	0	0	0.558843	-0.058634	scald
1	9-23-F1	9	pre-treatment	2016-02-22	9	23	23F1	expt sheep	F1	Front left	front foot	left	foot	58.3032	0	43.1137	0	4.59577	1	1	0	1	0	0	1	3	0	0	no disease		1	0				0		0	0	0	0	20506	1.77308	0	1.64457	0	0.74786	1.20148	no disease
1	33-29-F1	33	pre-treatment	2016-05-16	33	29	29F1	expt sheep	F1	Front left	front foot	left	foot	79.3917	908.036	0	0	0	1	1	1	0	0	0	0	4	0	0	no disease		1	0				0		0	0	0	0	20590	1.90521	2.95858	0	0	0		footrot
1	21-26-F4	21	pre-treatment	2016-04-04	21	26	26F4	expt sheep	F4	Back right	back foot	right	foot	24.117	392.679	0	0	0	1	0	1	0	0	0	0	4	0	0	no disease		1			0		0		0	0	0	0	20548	1.39997	2.59514	0	0	0		no disease
1	31-28-F3	31	pre-treatment	2016-05-09	31	28	28F3	expt sheep	F3	Back left	back foot	left	foot	0	0	37.3985	0	8.017	1	0	0	1	0	0	1	3	0	0	no disease		0				0	0		0	0	0	0	20583	0	0	1.58431	0	0.955062	1.18008	no disease
1	21-29-F1	21	pre-treatment	2016-04-04	21	29	29F1	expt sheep	F1	Front left	front foot	left	foot	0	0	0	0	0	0	0	0	0	0	0	0	4	0	0	no disease		1	0				0		0	0	0	0	20548	0	0	0	0	0		footrot
1	43-5-F4	43	post-treatment	2016-06-13	43	5	5F4	expt sheep	F4	Back right	back foot	right	foot	5124.36	770.382	19225.2	3589.16	731.037	1	1	1	1	1	1	1	1	3	fr&CODD	CODD	CODD & footrot	1			3		3	codd1-4	0	0	1	0	20618	3.70972	2.88727	4.28389	3.55511	2.86453	3.89478	codd
1	35-8-F3	35	pre-treatment	2016-05-23	35	8	8F3	expt sheep	F3	Back left	back foot	left	foot	32395.1	84738.1	156968	56820.9	75734.3	1	1	1	1	1	1	1	2	3	CODD	CODD	CODD only	0				3	3	codd1-4	0	0	1	0	20597	4.51049	4.92808	5.19582	4.75452	4.8793	4.98456	codd
1	43-5-F1	43	post-treatment	2016-06-13	43	5	5F1	expt sheep	F1	Front left	front foot	left	foot	117299	0	14517.6	16983	6943.24	1	1	0	1	1	1	1	1	3	fr&CODD	CODD	CODD & footrot	1	3				3	codd1-4	0	0	1	0	20618	5.0693	0	4.16193	4.23004	3.84162	4.10771	codd
1	25-30-F2	25	pre-treatment	2016-04-18	25	30	30F2	expt sheep	F2	Front right	front foot	right	foot	0	0	0	0	0	0	0	0	0	0	0	0	3	0	0	no disease		1		0			0		0	0	0	0	20562	0	0	0	0	0		scald
1	33-13-F1	33	pre-treatment	2016-05-16	33	13	13F1	expt sheep	F1	Front left	front foot	left	foot	0	0	74.4112	0	0	1	0	0	1	0	0	1	2	0	0	no disease		1	0				0		0	0	0	0	20590	0	0	1.87744	0	0	1.39452	no disease
1	43-27-F3	43	post-treatment	2016-06-13	43	27	27F3	expt sheep	F3	Back left	back foot	left	foot	0	0	0	0	0	0	0	0	0	0	0	0	3	0	0	no disease		1				0	0		0	0	0	0	20618	0	0	0	0	0		no disease
1	31-20-F2	31	pre-treatment	2016-05-09	31	20	20F2	expt sheep	F2	Front right	front foot	right	foot	0	0	0	0	0	0	0	0	0	0	0	0	3	0	0	no disease		0		0			0		0	0	0	0	20583	0	0	0	0	0		no disease
1	7-5-F3	7	pre-treatment	2016-02-15	7	5	5F3	expt sheep	F3	Back left	back foot	left	foot	4.84121	0	0	0	67.9347	1	0	0	0	0	1	1	4	0	0	no disease		0				0	0		0	0	0	0	20499	0.766503	0	0	0	1.83844	1.35497	codd
1	17-20-F3	17	pre-treatment	2016-03-21	17	20	20F3	expt sheep	F3	Back left	back foot	left	foot	0	0	0	7.64509	8.04411	0	0	0	0	0	0	0	4	0	0	no disease		1				0	0		0	0	0	0	20534	0	0	0	0.93677	0.956366	0.718479	no disease
1	17-23-F3	17	pre-treatment	2016-03-21	17	23	23F3	expt sheep	F3	Back left	back foot	left	foot	18.6684	0	27.5728	18.7531	9.43259	1	0	0	0	0	0	0	3	0	0	no disease		1				0	0		0	0	0	0	20534	1.29377	0	1.45595	1.29564	1.01839	1.26919	codd
1	7-9-F1	7	pre-treatment	2016-02-15	7	9	9F1	expt sheep	F1	Front left	front foot	left	foot	0	0	44.5439	0	11.9262	1	0	0	1	0	1	1	3	0	0	no disease		0	0				0		0	0	0	0	20499	0	0	1.65843	0	1.11147	1.2747	codd
1	41-3-F2	41	pre-treatment	2016-06-06	41	3	3F2	expt sheep	F2	Front right	front foot	right	foot	913.334	56387.1	33774.2	8297.81	4236.88	1	1	1	1	1	1	1	2	3	fr&CODD	CODD	CODD & footrot	0		2			2	codd1-4	0	0	1	0	20611	2.9611	4.75119	4.5286	3.91902	3.62715	4.18854	codd
1	11-14-F4	11	pre-treatment	2016-02-29	11	14	14F4	expt sheep	F4	Back right	back foot	right	foot	0	0	0	0	0	0	0	0	0	0	0	0	3	0	0	no disease		0			0		0		0	0	0	0	20513	0	0	0	0	0		codd
1	9-3-F1	9	pre-treatment	2016-02-22	9	3	3F1	expt sheep	F1	Front left	front foot	left	foot	0	0	0	0	0	0	0	0	0	0	0	0	4	0	0	no disease		1	0				0		0	0	0	0	20506	0	0	0	0	0		codd
1	25-15-F3	25	pre-treatment	2016-04-18	25	15	15F3	expt sheep	F3	Back left	back foot	left	foot	0	43797.8	0	0	10.1527	1	0	1	0	0	0	0	2	3	0	no disease		1				0	0		0	0	0	0	20562	0	4.64146	0	0	1.04738	0.529459	codd
1	51-27-F4	51	post-treatment	2016-07-11	51	27	27F4	expt sheep	F4	Back right	back foot	right	foot	26.3647	87591.1	0	0	4.69771	1	0	1	0	0	0	0	3	1	scald	ID		0			0		0		1	0	0	0	20646	1.43719	4.94246	0	0	0.7557	0.194765	scald
0	1-12-F2	1	pre-treatment	2016-01-26	1	12	12F2	expt sheep	F2	Front right	front foot	right	foot	0	0	0	0	21.7829	1	0	0	0	0	1	1	2	0	0	no disease		1		0			0		0	0	0	0	20479	0	0	0	0	1.35761	0.860994	codd
1	9-23-F3	9	pre-treatment	2016-02-22	9	23	23F3	expt sheep	F3	Back left	back foot	left	foot	0	0	0	0	6.40003	0	0	0	0	0	0	0	3	0	0	no disease		1					0		0	0	0	0	20506	0	0	0	0	0.869233	0.32906	codd
1	13-23-F4	13	pre-treatment	2016-03-07	13	23	23F4	expt sheep	F4	Back right	back foot	right	foot	32.9572	0	0	7.68925	13.6842	1	0	0	0	0	1	1	3	0	0	no disease		1			0		0		0	0	0	0	20520	1.53093	0	0	0.938982	1.16685	0.852754	codd
1	35-15-F1	35	pre-treatment	2016-05-23	35	15	15F1	expt sheep	F1	Front left	front foot	left	foot	2023.67	455748	0	0	274.106	1	1	1	0	0	1	1	2	3	fr&CODD	CODD	CODD & footrot	0	1				1	codd1-4	0	0	1	0	20597	3.30635	5.65873	0	0	2.4395	1.9608	codd
1	19-1-F1	19	pre-treatment	2016-03-28	19	1	1F1	expt sheep	F1	Front left	front foot	left	foot	0	0	0	0	0	0	0	0	0	0	0	0	3	0	0	no disease		0	0				0		0	0	0	0	20541	0	0	0	0	0		no disease
1	51-23-F1	51	post-treatment	2016-07-11	51	23	23F1	expt sheep	F1	Front left	front foot	left	foot	70.7936	0	0	0	0	1	1	0	0	0	0	0	3	0	0	no disease		0	0				0		0	0	0	0	20646	1.85609	0	0	0	0		no disease
1	23-25-F1	23	pre-treatment	2016-04-11	23	25	25F1	expt sheep	F1	Front left	front foot	left	foot	0	0	0	0	0	0	0	0	0	0	0	0	4	0	0	no disease		0	0				0		0	0	0	0	20555	0	0	0	0	0		no disease
1	7-24-F1	7	pre-treatment	2016-02-15	7	24	24F1	expt sheep	F1	Front left	front foot	left	foot	5.9186	0	0	0	0	0	0	0	0	0	0	0	4	0	0	no disease		0	0				0		0	0	0	0	20499	0.840018	0	0	0	0		no disease
1	29-12-F3	29	pre-treatment	2016-05-03	29	12	12F3	expt sheep	F3	Back left	back foot	left	foot	23393.7	7814.3	120852	3015.09	12046.2	1	1	1	1	1	1	1	2	3	footrot	FR		1				0	0		0	1	0	0	20577	4.36912	3.89295	5.08226	3.47944	4.08089	4.65614	codd
1	30-41-F2	30	pre-treatment	2016-05-04	30	41	41F2	source sheep	F2	Front right	front foot	right	foot	66.6745	0	128.354	57.3361	7.01043	1	1	0	1	1	0	1	2	3	0	no disease		1		0			0		0	0	0	0	20578	1.83043	0	2.11178	1.76594	0.903656	1.80776
1	5-29-F1	5	pre-treatment	2016-02-08	5	29	29F1	expt sheep	F1	Front left	front foot	left	foot	32.4601	0	32.1648	0	0	1	0	0	0	0	0	0	3	0	0	no disease		1	0				0		0	0	0	0	20492	1.52453	0	1.52068	0	0	1.03026	footrot
1	9-11-F2	9	pre-treatment	2016-02-22	9	11	11F2	expt sheep	F2	Front right	front foot	right	foot	12.2821	0	0	0	0	0	0	0	0	0	0	0	3	0	0	no disease		1					0		0	0	0	0	20506	1.12327	0	0	0	0		scald
1	25-11-F4	25	pre-treatment	2016-04-18	25	11	11F4	expt sheep	F4	Back right	back foot	right	foot	0	0	0	0	0	0	0	0	0	0	0	0	3	0	0	no disease		1			0		0		0	0	0	0	20562	0	0	0	0	0		no disease
1	33-20-F4	33	pre-treatment	2016-05-16	33	20	20F4	expt sheep	F4	Back right	back foot	right	foot	0	0	0	0	0	0	0	0	0	0	0	0	3	0	0	no disease		1			0		0		0	0	0	0	20590	0	0	0	0	0		no disease
1	31-23-F1	31	pre-treatment	2016-05-09	31	23	23F1	expt sheep	F1	Front left	front foot	left	foot	16.6178	94.8655	0	0	0	1	0	1	0	0	0	0	2	3	0	no disease		0	0				0		0	0	0	0	20583	1.24595	1.98166	0	0	0		no disease
1	3-37-F1	3	pre-treatment	2016-02-02	3	37	37F1	source sheep	F1	Front left	front foot	left	foot	17.2984	0	67.498	2.85917	6.21697	1	0	0	1	0	0	1	2	3	0	no disease		1	0				0		0	0	0	0	20486	1.26241	0	1.83568	0.586494	0.858355	1.40696
0	1-4-F4	1	pre-treatment	2016-01-26	1	4	4F4	expt sheep	F4	Back right	back foot	right	foot	6.34317	0	0	0	12.8829	0	0	0	0	0	1	1	3	1	0	no disease		1			0		0		0	0	0	0	20479	0.865883	0	0	0	1.14248	0.632893	no disease
1	1-11-F1	1	pre-treatment	2016-01-26	1	11	11F1	expt sheep	F1	Front left	front foot	left	foot	0	0	21.7714	0	4.1595	1	0	0	0	0	0	0	2	0	0	no disease		1	0				0		0	0	0	0	20479	0	0	1.35739	0	0.712608	0.936696	scald
1	47-27-F2	47	post-treatment	2016-06-27	47	27	27F2	expt sheep	F2	Front right	front foot	right	foot	0	0	0	0	0	0	0	0	0	0	0	0	3	0	0	no disease		1		0			0		0	0	0	0	20632	0	0	0	0	0		no disease
1	7-13-F2	7	pre-treatment	2016-02-15	7	13	13F2	expt sheep	F2	Front right	front foot	right	foot	0	0	0	0	0	0	0	0	0	0	0	0	4	0	0	no disease		0		0			0		0	0	0	0	20499	0	0	0	0	0		no disease
1	9-5-F1	9	pre-treatment	2016-02-22	9	5	5F1	expt sheep	F1	Front left	front foot	left	foot	0	0	0	0	0	0	0	0	0	0	0	0	3	0	0	no disease		1	0				0		0	0	0	0	20506	0	0	0	0	0		codd
[truncated: 421 more rows]
[truncated: 7 more columns]
